# Supplementary material for: Leveraging methylation to identify the potential causal genes associated with survival in lung adenocarcinoma and lung squamous cell carcinoma
Source: PubMed Central journal article supplement — Oncol Lett. 2020 Apr 22;20(1):193–200. doi: 10.3892/ol.2020.11564 (PMC7291670; doi:10.3892/ol.2020.11564), 2020-04-22
Supplement: Supplementary_Data1.pdf [file Supplementary_Data1.pdf]

Table SI. Lung adenocarcinoma-specific Differential Gene Expression analysis.

| Gene            | logFC    | logCPM   | P-value                 | FDR                     |
|-----------------|----------|----------|-------------------------|-------------------------|
| <i>PYCR1</i>    | -3.7086  | 6.309846 | 1.25x10 <sup>-128</sup> | 2.14x10 <sup>-124</sup> |
| <i>KANK3</i>    | 3.049292 | 4.334926 | 1.88x10 <sup>-113</sup> | 1.62x10 <sup>-109</sup> |
| <i>SPOCK2</i>   | 3.392889 | 8.593921 | 1.26x10 <sup>-106</sup> | 7.24x10 <sup>-103</sup> |
| <i>LIMS2</i>    | 2.785837 | 5.961061 | 3.38x10 <sup>-106</sup> | 1.45x10 <sup>-102</sup> |
| <i>RAMP2</i>    | 2.894772 | 5.801139 | 6.41x10 <sup>-104</sup> | 2.21x10 <sup>-100</sup> |
| <i>RTKN2</i>    | 4.450645 | 7.263726 | 1.60x10 <sup>-102</sup> | 4.57x10 <sup>-99</sup>  |
| <i>GRK5</i>     | 2.540182 | 5.892225 | 1.95x10 <sup>-101</sup> | 4.80x10 <sup>-98</sup>  |
| <i>EMP2</i>     | 2.777652 | 9.932181 | 8.58x10 <sup>-99</sup>  | 1.84x10 <sup>-95</sup>  |
| <i>PECAM1</i>   | 2.120605 | 7.539866 | 3.25x10 <sup>-98</sup>  | 6.21x10 <sup>-95</sup>  |
| <i>TUBB3</i>    | -4.63199 | 6.176744 | 5.36x10 <sup>-90</sup>  | 7.67x10 <sup>-87</sup>  |
| <i>STX11</i>    | 2.921359 | 5.64036  | 9.15x10 <sup>-89</sup>  | 1.21x10 <sup>-85</sup>  |
| <i>C13orf15</i> | 2.845886 | 7.517775 | 1.55x10 <sup>-83</sup>  | 1.90x10 <sup>-80</sup>  |
| <i>GPT2</i>     | -2.98404 | 4.927083 | 9.05x10 <sup>-83</sup>  | 1.04x10 <sup>-79</sup>  |
| <i>FAM83A</i>   | -7.13148 | 6.239727 | 1.15x10 <sup>-82</sup>  | 1.23x10 <sup>-79</sup>  |
| <i>EPAS1</i>    | 2.683975 | 10.48087 | 1.73x10 <sup>-82</sup>  | 1.64x10 <sup>-79</sup>  |
| <i>WWC2</i>     | 2.305509 | 6.705067 | 1.81x10 <sup>-82</sup>  | 1.64x10 <sup>-79</sup>  |
| <i>PTPN21</i>   | 2.375231 | 5.912817 | 8.01x10 <sup>-82</sup>  | 6.88x10 <sup>-79</sup>  |
| <i>ETV4</i>     | -3.73355 | 4.445968 | 1.77x10 <sup>-81</sup>  | 1.45x10 <sup>-78</sup>  |
| <i>JAM2</i>     | 2.332984 | 4.039246 | 9.74x10 <sup>-81</sup>  | 7.61x10 <sup>-78</sup>  |
| <i>OTUD1</i>    | 2.086177 | 5.660774 | 1.36x10 <sup>-80</sup>  | 1.02x10 <sup>-77</sup>  |
| <i>GOLM1</i>    | -2.95286 | 7.774695 | 1.56x10 <sup>-80</sup>  | 1.08x10 <sup>-77</sup>  |
| <i>FHL1</i>     | 3.267621 | 7.691014 | 1.63x10 <sup>-80</sup>  | 1.08x10 <sup>-77</sup>  |
| <i>DENND3</i>   | 2.091368 | 6.499957 | 1.64x10 <sup>-80</sup>  | 1.08x10 <sup>-77</sup>  |
| <i>ADRB2</i>    | 3.186813 | 4.685376 | 2.19x10 <sup>-80</sup>  | 1.39x10 <sup>-77</sup>  |
| <i>SH2D3C</i>   | 2.218778 | 5.66917  | 7.94x10 <sup>-80</sup>  | 4.87x10 <sup>-77</sup>  |
| <i>EDNRB</i>    | 3.471667 | 6.706482 | 9.49x10 <sup>-80</sup>  | 5.62x10 <sup>-77</sup>  |
| <i>CAV1</i>     | 3.367912 | 9.727698 | 1.90x10 <sup>-78</sup>  | 1.09x10 <sup>-75</sup>  |

|                 |          |          |                        |                        |
|-----------------|----------|----------|------------------------|------------------------|
| <i>NECAB1</i>   | 3.200631 | 3.965567 | 2.17x10 <sup>-78</sup> | 1.20x10 <sup>-75</sup> |
| <i>TEK</i>      | 3.11977  | 5.882073 | 3.43x10 <sup>-78</sup> | 1.84x10 <sup>-75</sup> |
| <i>TOP2A</i>    | -4.27299 | 6.290073 | 1.68x10 <sup>-77</sup> | 8.48x10 <sup>-75</sup> |
| <i>PRX</i>      | 3.57202  | 6.148296 | 4.31x10 <sup>-77</sup> | 2.12x10 <sup>-74</sup> |
| <i>C9orf140</i> | -3.84478 | 3.537927 | 4.77x10 <sup>-77</sup> | 2.28x10 <sup>-74</sup> |
| <i>TAL1</i>     | 2.872479 | 3.368463 | 9.02x10 <sup>-77</sup> | 4.19x10 <sup>-74</sup> |
| <i>HSPA12B</i>  | 2.733328 | 4.500222 | 3.56x10 <sup>-76</sup> | 1.57x10 <sup>-73</sup> |
| <i>RAMP3</i>    | 3.383575 | 6.075504 | 7.53x10 <sup>-76</sup> | 3.24x10 <sup>-73</sup> |
| <i>ACVRL1</i>   | 2.365783 | 6.82717  | 5.27x10 <sup>-74</sup> | 2.21x10 <sup>-71</sup> |
| <i>CLEC3B</i>   | 3.883343 | 6.72535  | 6.13x10 <sup>-74</sup> | 2.51x10 <sup>-71</sup> |
| <i>RCCI</i>     | -2.12394 | 5.108533 | 9.77x10 <sup>-74</sup> | 3.91x10 <sup>-71</sup> |
| <i>ARHGEF15</i> | 2.395429 | 5.007123 | 5.12x10 <sup>-73</sup> | 2.00x10 <sup>-70</sup> |
| <i>FABP4</i>    | 5.358082 | 6.368492 | 1.41x10 <sup>-72</sup> | 5.38x10 <sup>-70</sup> |
| <i>USHBP1</i>   | 2.744683 | 2.761501 | 1.62x10 <sup>-72</sup> | 6.05x10 <sup>-70</sup> |
| <i>FERMT1</i>   | -3.44341 | 4.179461 | 2.77x10 <sup>-72</sup> | 1.00x10 <sup>-69</sup> |
| <i>KIF4A</i>    | -4.63249 | 3.708423 | 2.79x10 <sup>-72</sup> | 1.00x10 <sup>-69</sup> |
| <i>CENPF</i>    | -3.84591 | 5.214563 | 3.25x10 <sup>-72</sup> | 1.14x10 <sup>-69</sup> |
| <i>UBE2T</i>    | -3.49915 | 3.353289 | 7.18x10 <sup>-72</sup> | 2.47x10 <sup>-69</sup> |
| <i>LDB2</i>     | 2.451123 | 5.691392 | 8.62x10 <sup>-72</sup> | 2.91x10 <sup>-69</sup> |
| <i>SGEF</i>     | 2.795325 | 5.811863 | 3.85x10 <sup>-70</sup> | 1.20x10 <sup>-67</sup> |
| <i>ANLN</i>     | -4.27357 | 4.951034 | 4.08x10 <sup>-70</sup> | 1.25x10 <sup>-67</sup> |
| <i>CCNB1</i>    | -3.18874 | 4.758156 | 6.55x10 <sup>-70</sup> | 1.94x10 <sup>-67</sup> |
| <i>CDC6</i>     | -3.67073 | 3.607072 | 1.39x10 <sup>-69</sup> | 4.06x10 <sup>-67</sup> |
| <i>FMO2</i>     | 3.128877 | 7.471572 | 2.42x10 <sup>-69</sup> | 6.94x10 <sup>-67</sup> |
| <i>ASPM</i>     | -4.03251 | 3.733637 | 1.73x10 <sup>-68</sup> | 4.79x10 <sup>-66</sup> |
| <i>LGR4</i>     | -2.85    | 5.495939 | 2.77x10 <sup>-68</sup> | 7.57x10 <sup>-66</sup> |
| <i>IQGAP3</i>   | -4.11432 | 4.168017 | 4.13x10 <sup>-68</sup> | 1.09x10 <sup>-65</sup> |
| <i>DLGAP5</i>   | -4.31509 | 3.292848 | 5.08x10 <sup>-68</sup> | 1.32x10 <sup>-65</sup> |
| <i>HMGB3</i>    | -3.27826 | 7.141722 | 7.12x10 <sup>-68</sup> | 1.83x10 <sup>-65</sup> |

|                    |          |          |                        |                        |
|--------------------|----------|----------|------------------------|------------------------|
| <i>CALCRL</i>      | 2.587932 | 6.948808 | 1.73x10 <sup>-67</sup> | 4.36x10 <sup>-65</sup> |
| <i>KIF14</i>       | -4.30352 | 2.629729 | 1.94x10 <sup>-67</sup> | 4.84x10 <sup>-65</sup> |
| <i>SIPR1</i>       | 2.588716 | 6.687159 | 2.07x10 <sup>-67</sup> | 5.09x10 <sup>-65</sup> |
| <i>OCIAD2</i>      | -2.21885 | 6.117492 | 3.98x10 <sup>-67</sup> | 9.50x10 <sup>-65</sup> |
| <i>KIF26B</i>      | -3.45353 | 3.959136 | 9.81x10 <sup>-67</sup> | 2.31x10 <sup>-64</sup> |
| <i>UHRF1</i>       | -3.82789 | 3.343328 | 1.05x10 <sup>-66</sup> | 2.45x10 <sup>-64</sup> |
| <i>SEMA3G</i>      | 3.295627 | 5.415058 | 1.14x10 <sup>-66</sup> | 2.62x10 <sup>-64</sup> |
| <i>PSAT1</i>       | -3.60668 | 4.033114 | 1.35x10 <sup>-66</sup> | 3.01x10 <sup>-64</sup> |
| <i>FAM189A2</i>    | 3.250988 | 5.463548 | 1.35x10 <sup>-66</sup> | 3.01x10 <sup>-64</sup> |
| <i>PPAT</i>        | -2.06297 | 3.765902 | 2.96x10 <sup>-66</sup> | 6.45x10 <sup>-64</sup> |
| <i>TPX2</i>        | -4.06652 | 5.256174 | 3.09x10 <sup>-66</sup> | 6.65x10 <sup>-64</sup> |
| <i>GPR146</i>      | 2.359162 | 4.0514   | 4.13x10 <sup>-66</sup> | 8.77x10 <sup>-64</sup> |
| <i>PALM2-AKAP2</i> | 2.109067 | 7.413979 | 5.60x10 <sup>-66</sup> | 1.17x10 <sup>-63</sup> |
| <i>CLIC5</i>       | 3.827341 | 7.896351 | 7.65x10 <sup>-66</sup> | 1.58x10 <sup>-63</sup> |
| <i>ARHGAP6</i>     | 2.459825 | 3.57269  | 7.91x10 <sup>-66</sup> | 1.62x10 <sup>-63</sup> |
| <i>MDK</i>         | -2.89675 | 7.376977 | 1.36x10 <sup>-65</sup> | 2.75x10 <sup>-63</sup> |
| <i>C20orf160</i>   | 2.582881 | 3.393392 | 1.58x10 <sup>-65</sup> | 3.17x10 <sup>-63</sup> |
| <i>BUB1B</i>       | -3.9757  | 3.271491 | 2.57x10 <sup>-65</sup> | 5.07x10 <sup>-63</sup> |
| <i>KIF11</i>       | -3.23075 | 4.283291 | 3.07x10 <sup>-65</sup> | 5.99x10 <sup>-63</sup> |
| <i>AGER</i>        | 5.533612 | 10.21001 | 4.35x10 <sup>-65</sup> | 8.34x10 <sup>-63</sup> |
| <i>SPAG5</i>       | -3.43039 | 4.298376 | 4.37x10 <sup>-65</sup> | 8.34x10 <sup>-63</sup> |
| <i>WNT3A</i>       | 4.682663 | 3.041583 | 9.77x10 <sup>-65</sup> | 1.81x10 <sup>-62</sup> |
| <i>C13orf36</i>    | 5.896936 | 3.23554  | 1.58x10 <sup>-64</sup> | 2.89x10 <sup>-62</sup> |
| <i>MEX3A</i>       | -4.52866 | 4.399018 | 1.85x10 <sup>-64</sup> | 3.35x10 <sup>-62</sup> |
| <i>SLC19A3</i>     | 3.397671 | 3.9674   | 2.36x10 <sup>-64</sup> | 4.23x10 <sup>-62</sup> |
| <i>KIF20A</i>      | -3.67857 | 3.619323 | 3.26x10 <sup>-64</sup> | 5.78x10 <sup>-62</sup> |
| <i>RECQL4</i>      | -3.21711 | 3.369024 | 4.35x10 <sup>-64</sup> | 7.63x10 <sup>-62</sup> |
| <i>GPRIN1</i>      | -3.06304 | 3.026195 | 5.60x10 <sup>-64</sup> | 9.72x10 <sup>-62</sup> |
| <i>CDC48</i>       | -3.45884 | 3.752309 | 3.44x10 <sup>-63</sup> | 5.79x10 <sup>-61</sup> |

|                 |          |          |                        |                        |
|-----------------|----------|----------|------------------------|------------------------|
| <i>DEPDC1</i>   | -4.1903  | 2.884966 | 3.58x10 <sup>-63</sup> | 5.97x10 <sup>-61</sup> |
| <i>CRABP2</i>   | -5.98089 | 6.975558 | 4.17x10 <sup>-63</sup> | 6.90x10 <sup>-61</sup> |
| <i>NEK2</i>     | -4.07653 | 3.299612 | 8.77x10 <sup>-63</sup> | 1.41x10 <sup>-60</sup> |
| <i>KIF2C</i>    | -4.10077 | 3.764513 | 1.60x10 <sup>-62</sup> | 2.54x10 <sup>-60</sup> |
| <i>STIL</i>     | -2.87093 | 3.086547 | 2.01x10 <sup>-62</sup> | 3.17x10 <sup>-60</sup> |
| <i>HMMR</i>     | -3.58838 | 3.272481 | 2.76x10 <sup>-62</sup> | 4.32x10 <sup>-60</sup> |
| <i>SLC25A10</i> | -2.0736  | 4.655872 | 3.03x10 <sup>-62</sup> | 4.68x10 <sup>-60</sup> |
| <i>PLK1</i>     | -3.64872 | 4.003414 | 3.07x10 <sup>-62</sup> | 4.71x10 <sup>-60</sup> |
| <i>GPD1</i>     | 4.605345 | 5.354686 | 5.62x10 <sup>-62</sup> | 8.48x10 <sup>-60</sup> |
| <i>SLC2A1</i>   | -3.84446 | 6.983178 | 5.84x10 <sup>-62</sup> | 8.74x10 <sup>-60</sup> |
| <i>IGSF9</i>    | -3.8492  | 4.173656 | 7.33x10 <sup>-62</sup> | 1.09x10 <sup>-59</sup> |
| <i>NUF2</i>     | -4.25406 | 2.808089 | 7.39x10 <sup>-62</sup> | 1.09x10 <sup>-59</sup> |
| <i>B3GNT3</i>   | -4.45973 | 4.734296 | 9.13x10 <sup>-62</sup> | 1.33x10 <sup>-59</sup> |
| <i>LOC84740</i> | -6.42661 | 5.422287 | 1.07x10 <sup>-61</sup> | 1.54x10 <sup>-59</sup> |
| <i>ROBO4</i>    | 2.566358 | 6.45674  | 1.07x10 <sup>-61</sup> | 1.54x10 <sup>-59</sup> |
| <i>NCKAP5</i>   | 3.719499 | 5.026494 | 1.21x10 <sup>-61</sup> | 1.72x10 <sup>-59</sup> |
| <i>PAFAH1B3</i> | -2.19062 | 4.591398 | 1.34x10 <sup>-61</sup> | 1.89x10 <sup>-59</sup> |
| <i>STX1A</i>    | -3.44012 | 3.337163 | 1.57x10 <sup>-61</sup> | 2.17x10 <sup>-59</sup> |
| <i>RASIP1</i>   | 2.30091  | 4.919846 | 1.60x10 <sup>-61</sup> | 2.20x10 <sup>-59</sup> |
| <i>TNNC1</i>    | 4.218348 | 5.29727  | 1.62x10 <sup>-61</sup> | 2.21x10 <sup>-59</sup> |
| <i>TGMI</i>     | 3.330167 | 2.506846 | 3.35x10 <sup>-61</sup> | 4.43x10 <sup>-59</sup> |
| <i>FOXF1</i>    | 2.550933 | 4.920029 | 4.82x10 <sup>-61</sup> | 6.28x10 <sup>-59</sup> |
| <i>CDH5</i>     | 2.277131 | 7.345456 | 6.03x10 <sup>-61</sup> | 7.80x10 <sup>-59</sup> |
| <i>CDC20</i>    | -4.04854 | 4.330365 | 8.50x10 <sup>-61</sup> | 1.09x10 <sup>-58</sup> |
| <i>GINS1</i>    | -3.13453 | 3.156928 | 1.04x10 <sup>-60</sup> | 1.31x10 <sup>-58</sup> |
| <i>CCDC48</i>   | 2.954911 | 3.681844 | 1.26x10 <sup>-60</sup> | 1.58x10 <sup>-58</sup> |
| <i>HJURP</i>    | -4.08324 | 3.173139 | 1.42x10 <sup>-60</sup> | 1.76x10 <sup>-58</sup> |
| <i>KL</i>       | 2.92379  | 3.556937 | 1.74x10 <sup>-60</sup> | 2.15x10 <sup>-58</sup> |
| <i>PRCI</i>     | -2.83555 | 4.547435 | 2.15x10 <sup>-60</sup> | 2.64x10 <sup>-58</sup> |

|                 |          |          |                        |                        |
|-----------------|----------|----------|------------------------|------------------------|
| <i>CKAP2L</i>   | -3.68627 | 2.506734 | 3.70x10 <sup>-60</sup> | 4.48x10 <sup>-58</sup> |
| <i>TMEM184A</i> | -2.70939 | 4.427395 | 6.31x10 <sup>-60</sup> | 7.53x10 <sup>-58</sup> |
| <i>CEP55</i>    | -3.61864 | 3.910039 | 6.95x10 <sup>-60</sup> | 8.24x10 <sup>-58</sup> |
| <i>KIF23</i>    | -3.09947 | 3.56903  | 8.18x10 <sup>-60</sup> | 9.63x10 <sup>-58</sup> |
| <i>MELK</i>     | -4.26059 | 3.280399 | 1.74x10 <sup>-59</sup> | 2.04x10 <sup>-57</sup> |
| <i>UBE2C</i>    | -4.21361 | 4.257835 | 1.81x10 <sup>-59</sup> | 2.11x10 <sup>-57</sup> |
| <i>EMCN</i>     | 2.727988 | 5.563287 | 3.01x10 <sup>-59</sup> | 3.44x10 <sup>-57</sup> |
| <i>FOXM1</i>    | -3.55767 | 4.619286 | 3.89x10 <sup>-59</sup> | 4.40x10 <sup>-57</sup> |
| <i>CAV2</i>     | 2.299761 | 8.131186 | 1.01x10 <sup>-58</sup> | 1.12x10 <sup>-56</sup> |
| <i>CBLC</i>     | -3.54277 | 3.406721 | 1.51x10 <sup>-58</sup> | 1.66x10 <sup>-56</sup> |
| <i>CYYR1</i>    | 2.048652 | 5.207079 | 5.97x10 <sup>-58</sup> | 6.42x10 <sup>-56</sup> |
| <i>XDH</i>      | -4.80171 | 3.840118 | 6.42x10 <sup>-58</sup> | 6.86x10 <sup>-56</sup> |
| <i>MCM4</i>     | -2.44205 | 5.619217 | 8.56x10 <sup>-58</sup> | 9.08x10 <sup>-56</sup> |
| <i>ECT2</i>     | -2.33718 | 5.141886 | 1.16x10 <sup>-57</sup> | 1.22x10 <sup>-55</sup> |
| <i>TTK</i>      | -3.98801 | 2.648186 | 1.28x10 <sup>-57</sup> | 1.34x10 <sup>-55</sup> |
| <i>MKI67</i>    | -3.41813 | 5.796877 | 1.30x10 <sup>-57</sup> | 1.35x10 <sup>-55</sup> |
| <i>GREM1</i>    | -5.83692 | 5.906081 | 2.43x10 <sup>-57</sup> | 2.52x10 <sup>-55</sup> |
| <i>GIMAP8</i>   | 2.248968 | 5.788997 | 4.76x10 <sup>-57</sup> | 4.87x10 <sup>-55</sup> |
| <i>ZWINT</i>    | -2.74576 | 4.218289 | 5.32x10 <sup>-57</sup> | 5.41x10 <sup>-55</sup> |
| <i>ADM2</i>     | -3.43228 | 3.259686 | 6.15x10 <sup>-57</sup> | 6.22x10 <sup>-55</sup> |
| <i>INMT</i>     | 3.475325 | 7.517095 | 2.13x10 <sup>-56</sup> | 2.13x10 <sup>-54</sup> |
| <i>BIRC5</i>    | -4.15767 | 3.470559 | 3.66x10 <sup>-56</sup> | 3.63x10 <sup>-54</sup> |
| <i>PODXL2</i>   | -3.38854 | 4.950499 | 4.60x10 <sup>-56</sup> | 4.54x10 <sup>-54</sup> |
| <i>MYCT1</i>    | 2.050452 | 4.585187 | 1.15x10 <sup>-55</sup> | 1.13x10 <sup>-53</sup> |
| <i>NCAPH</i>    | -3.44443 | 3.118211 | 1.73x10 <sup>-55</sup> | 1.68x10 <sup>-53</sup> |
| <i>TNSI</i>     | 2.121052 | 9.43514  | 1.87x10 <sup>-55</sup> | 1.81x10 <sup>-53</sup> |
| <i>TROAP</i>    | -4.0591  | 2.687021 | 3.52x10 <sup>-55</sup> | 3.35x10 <sup>-53</sup> |
| <i>KIF18B</i>   | -3.91917 | 2.771388 | 4.59x10 <sup>-55</sup> | 4.29x10 <sup>-53</sup> |
| <i>FANCI</i>    | -2.29437 | 4.451377 | 4.87x10 <sup>-55</sup> | 4.52x10 <sup>-53</sup> |

|                |          |          |                        |                        |
|----------------|----------|----------|------------------------|------------------------|
| <i>RRM2</i>    | -3.48796 | 5.12621  | 5.81x10 <sup>-55</sup> | 5.31x10 <sup>-53</sup> |
| <i>GJB2</i>    | -4.73253 | 4.53354  | 8.00x10 <sup>-55</sup> | 7.28x10 <sup>-53</sup> |
| <i>EFNA4</i>   | -2.22762 | 3.72429  | 8.34x10 <sup>-55</sup> | 7.55x10 <sup>-53</sup> |
| <i>MCM10</i>   | -4.15889 | 2.501921 | 1.47x10 <sup>-54</sup> | 1.32x10 <sup>-52</sup> |
| <i>GCOM1</i>   | 3.1545   | 5.265156 | 1.68x10 <sup>-54</sup> | 1.50x10 <sup>-52</sup> |
| <i>SCUBE1</i>  | 3.931818 | 3.672727 | 1.74x10 <sup>-54</sup> | 1.55x10 <sup>-52</sup> |
| <i>CCNA2</i>   | -3.14684 | 3.812917 | 2.34x10 <sup>-54</sup> | 2.05x10 <sup>-52</sup> |
| <i>CLEC14A</i> | 2.14227  | 6.212785 | 2.38x10 <sup>-54</sup> | 2.08x10 <sup>-52</sup> |
| <i>NDC80</i>   | -3.60545 | 2.685353 | 4.78x10 <sup>-54</sup> | 4.15x10 <sup>-52</sup> |
| <i>BTNL9</i>   | 3.910795 | 4.954296 | 5.20x10 <sup>-54</sup> | 4.49x10 <sup>-52</sup> |
| <i>ECSCR</i>   | 2.210314 | 3.396861 | 6.65x10 <sup>-54</sup> | 5.71x10 <sup>-52</sup> |
| <i>CENPE</i>   | -3.1868  | 3.002389 | 1.29x10 <sup>-53</sup> | 1.09x10 <sup>-51</sup> |
| <i>EPR1</i>    | -3.62156 | 3.768822 | 1.40x10 <sup>-53</sup> | 1.18x10 <sup>-51</sup> |
| <i>CDCA5</i>   | -3.20337 | 3.889928 | 1.62x10 <sup>-53</sup> | 1.36x10 <sup>-51</sup> |
| <i>SERINC2</i> | -2.08798 | 6.974195 | 2.06x10 <sup>-53</sup> | 1.71x10 <sup>-51</sup> |
| <i>HIGD1B</i>  | 2.871754 | 2.776513 | 2.15x10 <sup>-53</sup> | 1.76x10 <sup>-51</sup> |
| <i>EZH2</i>    | -2.7878  | 3.451298 | 2.60x10 <sup>-53</sup> | 2.12x10 <sup>-51</sup> |
| <i>CGNL1</i>   | 2.281298 | 6.729941 | 3.12x10 <sup>-53</sup> | 2.53x10 <sup>-51</sup> |
| <i>NME1</i>    | -2.17506 | 5.978491 | 3.67x10 <sup>-53</sup> | 2.96x10 <sup>-51</sup> |
| <i>CCDC85A</i> | 2.922841 | 3.814331 | 3.90x10 <sup>-53</sup> | 3.13x10 <sup>-51</sup> |
| <i>AOC3</i>    | 2.26798  | 7.861842 | 5.17x10 <sup>-53</sup> | 4.11x10 <sup>-51</sup> |
| <i>NUSAP1</i>  | -2.74745 | 4.208516 | 6.24x10 <sup>-53</sup> | 4.92x10 <sup>-51</sup> |
| <i>SDPR</i>    | 2.950641 | 7.914752 | 9.22x10 <sup>-53</sup> | 7.18x10 <sup>-51</sup> |
| <i>CHAF1B</i>  | -2.29894 | 2.91549  | 9.24x10 <sup>-53</sup> | 7.18x10 <sup>-51</sup> |
| <i>GRASP</i>   | 2.442    | 4.454574 | 1.25x10 <sup>-52</sup> | 9.57x10 <sup>-51</sup> |
| <i>FHL2</i>    | -2.9228  | 5.746131 | 1.34x10 <sup>-52</sup> | 1.02x10 <sup>-50</sup> |
| <i>FAM107A</i> | 4.112955 | 7.223009 | 1.45x10 <sup>-52</sup> | 1.10x10 <sup>-50</sup> |
| <i>STXBP6</i>  | 3.448558 | 3.371817 | 1.74x10 <sup>-52</sup> | 1.32x10 <sup>-50</sup> |
| <i>GINS2</i>   | -2.8944  | 2.686978 | 1.76x10 <sup>-52</sup> | 1.33x10 <sup>-50</sup> |

|                |          |          |                        |                        |
|----------------|----------|----------|------------------------|------------------------|
| <i>AK3L1</i>   | -3.52617 | 3.153744 | 2.44x10 <sup>-52</sup> | 1.82x10 <sup>-50</sup> |
| <i>CLDN5</i>   | 2.852564 | 6.606271 | 2.49x10 <sup>-52</sup> | 1.84x10 <sup>-50</sup> |
| <i>NCAPG</i>   | -3.52058 | 3.533824 | 2.64x10 <sup>-52</sup> | 1.94x10 <sup>-50</sup> |
| <i>CCNB2</i>   | -3.38715 | 3.5462   | 3.22x10 <sup>-52</sup> | 2.37x10 <sup>-50</sup> |
| <i>RAPGEF4</i> | 2.123102 | 3.406817 | 3.39x10 <sup>-52</sup> | 2.47x10 <sup>-50</sup> |
| <i>BUB1</i>    | -3.12481 | 3.880232 | 3.56x10 <sup>-52</sup> | 2.57x10 <sup>-50</sup> |
| <i>AKAP2</i>   | 2.238092 | 7.26245  | 4.10x10 <sup>-52</sup> | 2.95x10 <sup>-50</sup> |
| <i>PTGES</i>   | -3.15401 | 4.84232  | 5.65x10 <sup>-52</sup> | 4.05x10 <sup>-50</sup> |
| <i>NFKBIL2</i> | -2.30182 | 3.390826 | 1.07x10 <sup>-51</sup> | 7.62x10 <sup>-50</sup> |
| <i>LYPD1</i>   | -4.10158 | 3.113354 | 1.22x10 <sup>-51</sup> | 8.57x10 <sup>-50</sup> |
| <i>EEF1A2</i>  | -6.55503 | 4.921757 | 1.33x10 <sup>-51</sup> | 9.32x10 <sup>-50</sup> |
| <i>GALNT14</i> | -4.47253 | 3.899556 | 1.54x10 <sup>-51</sup> | 1.08x10 <sup>-49</sup> |
| <i>KAL1</i>    | 2.586814 | 7.189084 | 1.70x10 <sup>-51</sup> | 1.19x10 <sup>-49</sup> |
| <i>DBNDD1</i>  | -2.15776 | 4.552361 | 2.71x10 <sup>-51</sup> | 1.88x10 <sup>-49</sup> |
| <i>KCNN4</i>   | -3.57513 | 5.150208 | 2.99x10 <sup>-51</sup> | 2.06x10 <sup>-49</sup> |
| <i>TK1</i>     | -2.76708 | 5.216623 | 3.03x10 <sup>-51</sup> | 2.07x10 <sup>-49</sup> |
| <i>KCNT2</i>   | 3.198941 | 2.593518 | 3.18x10 <sup>-51</sup> | 2.17x10 <sup>-49</sup> |
| <i>VIPR1</i>   | 3.649758 | 6.238515 | 3.23x10 <sup>-51</sup> | 2.20x10 <sup>-49</sup> |
| <i>PLEK2</i>   | -3.05507 | 3.729698 | 3.48x10 <sup>-51</sup> | 2.36x10 <sup>-49</sup> |
| <i>MAD2L1</i>  | -2.85694 | 3.596606 | 4.49x10 <sup>-51</sup> | 3.01x10 <sup>-49</sup> |
| <i>AURKA</i>   | -2.75864 | 3.883283 | 5.21x10 <sup>-51</sup> | 3.47x10 <sup>-49</sup> |
| <i>FBXO32</i>  | -2.92358 | 4.401293 | 5.54x10 <sup>-51</sup> | 3.68x10 <sup>-49</sup> |
| <i>PGM2L1</i>  | -2.18884 | 5.118641 | 5.95x10 <sup>-51</sup> | 3.93x10 <sup>-49</sup> |
| <i>MYEOV</i>   | -6.09438 | 2.919453 | 8.75x10 <sup>-51</sup> | 5.77x10 <sup>-49</sup> |
| <i>PROM2</i>   | -2.79226 | 5.832966 | 1.32x10 <sup>-50</sup> | 8.65x10 <sup>-49</sup> |
| <i>KIFC1</i>   | -2.80656 | 3.829076 | 1.51x10 <sup>-50</sup> | 9.84x10 <sup>-49</sup> |
| <i>ANGPTL1</i> | 2.724937 | 3.050487 | 1.55x10 <sup>-50</sup> | 1.01x10 <sup>-48</sup> |
| <i>FGF11</i>   | -3.72176 | 2.521316 | 1.94x10 <sup>-50</sup> | 1.26x10 <sup>-48</sup> |
| <i>ABCA12</i>  | -6.32859 | 2.773648 | 1.96x10 <sup>-50</sup> | 1.27x10 <sup>-48</sup> |

|                 |          |          |                        |                        |
|-----------------|----------|----------|------------------------|------------------------|
| <i>TNFRSF21</i> | -2.12656 | 7.178325 | 2.94x10 <sup>-50</sup> | 1.88x10 <sup>-48</sup> |
| <i>ERO1L</i>    | -2.43258 | 6.691914 | 3.42x10 <sup>-50</sup> | 2.19x10 <sup>-48</sup> |
| <i>CELSR3</i>   | -3.55476 | 3.183675 | 3.67x10 <sup>-50</sup> | 2.33x10 <sup>-48</sup> |
| <i>FAM111B</i>  | -2.96256 | 3.003793 | 3.67x10 <sup>-50</sup> | 2.33x10 <sup>-48</sup> |
| <i>CABYR</i>    | -4.80491 | 2.815829 | 7.21x10 <sup>-50</sup> | 4.52x10 <sup>-48</sup> |
| <i>SMAD6</i>    | 2.791294 | 4.745791 | 9.78x10 <sup>-50</sup> | 6.02x10 <sup>-48</sup> |
| <i>KIAA0101</i> | -2.95161 | 3.182847 | 9.81x10 <sup>-50</sup> | 6.02x10 <sup>-48</sup> |
| <i>CTHRC1</i>   | -4.0644  | 5.603476 | 1.07x10 <sup>-49</sup> | 6.54x10 <sup>-48</sup> |
| <i>RHBDL2</i>   | -3.21295 | 2.77616  | 1.23x10 <sup>-49</sup> | 7.47x10 <sup>-48</sup> |
| <i>ESPL1</i>    | -3.64168 | 3.033313 | 1.81x10 <sup>-49</sup> | 1.09x10 <sup>-47</sup> |
| <i>PTPRH</i>    | -5.81237 | 3.201888 | 2.01x10 <sup>-49</sup> | 1.20x10 <sup>-47</sup> |
| <i>GTSE1</i>    | -3.39998 | 2.694587 | 2.08x10 <sup>-49</sup> | 1.24x10 <sup>-47</sup> |
| <i>PTPRB</i>    | 2.610818 | 7.242177 | 2.42x10 <sup>-49</sup> | 1.43x10 <sup>-47</sup> |
| <i>NCAPG2</i>   | -2.11263 | 4.49811  | 2.45x10 <sup>-49</sup> | 1.44x10 <sup>-47</sup> |
| <i>PKNOX2</i>   | 2.474721 | 3.430709 | 3.11x10 <sup>-49</sup> | 1.82x10 <sup>-47</sup> |
| <i>DPEP2</i>    | 2.369898 | 3.734106 | 5.18x10 <sup>-49</sup> | 3.00x10 <sup>-47</sup> |
| <i>COX4I2</i>   | 2.627257 | 3.346161 | 8.09x10 <sup>-49</sup> | 4.65x10 <sup>-47</sup> |
| <i>SPTBN2</i>   | -2.56833 | 4.942098 | 1.02x10 <sup>-48</sup> | 5.84x10 <sup>-47</sup> |
| <i>SLC35F2</i>  | -2.09752 | 5.020597 | 1.11x10 <sup>-48</sup> | 6.36x10 <sup>-47</sup> |
| <i>FAM46B</i>   | 2.669847 | 4.634807 | 1.15x10 <sup>-48</sup> | 6.53x10 <sup>-47</sup> |
| <i>ITPKA</i>    | -5.69051 | 2.994903 | 1.37x10 <sup>-48</sup> | 7.76x10 <sup>-47</sup> |
| <i>CCNE1</i>    | -3.75046 | 2.548281 | 1.53x10 <sup>-48</sup> | 8.66x10 <sup>-47</sup> |
| <i>THSD1</i>    | 2.219939 | 3.66199  | 2.54x10 <sup>-48</sup> | 1.42x10 <sup>-46</sup> |
| <i>SRD5A1</i>   | -2.06014 | 3.935272 | 2.74x10 <sup>-48</sup> | 1.52x10 <sup>-46</sup> |
| <i>COL10A1</i>  | -5.13283 | 5.49586  | 3.16x10 <sup>-48</sup> | 1.75x10 <sup>-46</sup> |
| <i>HMGAI</i>    | -2.41437 | 7.252439 | 5.85x10 <sup>-48</sup> | 3.19x10 <sup>-46</sup> |
| <i>UPK3B</i>    | 4.960993 | 6.302941 | 7.08x10 <sup>-48</sup> | 3.84x10 <sup>-46</sup> |
| <i>LTBP4</i>    | 2.131525 | 8.049333 | 9.15x10 <sup>-48</sup> | 4.92x10 <sup>-46</sup> |
| <i>TCF21</i>    | 2.894521 | 5.643461 | 1.32x10 <sup>-47</sup> | 7.09x10 <sup>-46</sup> |



|                 |          |          |                        |                        |
|-----------------|----------|----------|------------------------|------------------------|
| <i>MCM2</i>     | -2.24681 | 5.319299 | 2.32x10 <sup>-47</sup> | 1.21x10 <sup>-45</sup> |
| <i>CD36</i>     | 2.942626 | 6.858637 | 2.44x10 <sup>-47</sup> | 1.27x10 <sup>-45</sup> |
| <i>SC65</i>     | -2.04171 | 4.597513 | 4.10x10 <sup>-47</sup> | 2.12x10 <sup>-45</sup> |
| <i>COCH</i>     | -4.39186 | 3.013164 | 4.26x10 <sup>-47</sup> | 2.19x10 <sup>-45</sup> |
| <i>SEMA5A</i>   | 2.346915 | 6.358638 | 4.30x10 <sup>-47</sup> | 2.21x10 <sup>-45</sup> |
| <i>KDELR3</i>   | -2.35096 | 5.172185 | 5.70x10 <sup>-47</sup> | 2.90x10 <sup>-45</sup> |
| <i>DACHI</i>    | 2.540962 | 3.518054 | 5.96x10 <sup>-47</sup> | 3.02x10 <sup>-45</sup> |
| <i>C16orf75</i> | -2.19272 | 3.125463 | 6.35x10 <sup>-47</sup> | 3.20x10 <sup>-45</sup> |
| <i>CD101</i>    | 2.812907 | 4.048064 | 1.05x10 <sup>-46</sup> | 5.21x10 <sup>-45</sup> |
| <i>DAPK2</i>    | 2.323489 | 5.407219 | 1.05x10 <sup>-46</sup> | 5.22x10 <sup>-45</sup> |
| <i>TMPRSS4</i>  | -5.09328 | 6.113555 | 1.06x10 <sup>-46</sup> | 5.23x10 <sup>-45</sup> |
| <i>PKMYT1</i>   | -3.27917 | 2.809633 | 1.12x10 <sup>-46</sup> | 5.52x10 <sup>-45</sup> |
| <i>CYP24A1</i>  | -6.83034 | 5.50716  | 1.23x10 <sup>-46</sup> | 6.05x10 <sup>-45</sup> |
| <i>SLC39A8</i>  | 2.26455  | 8.713892 | 2.03x10 <sup>-46</sup> | 9.90x10 <sup>-45</sup> |
| <i>ITLN2</i>    | 5.888068 | 3.859452 | 2.13x10 <sup>-46</sup> | 1.04x10 <sup>-44</sup> |
| <i>CHEK1</i>    | -2.42478 | 3.001416 | 2.23x10 <sup>-46</sup> | 1.08x10 <sup>-44</sup> |
| <i>FCN3</i>     | 4.7149   | 6.849796 | 3.06x10 <sup>-46</sup> | 1.47x10 <sup>-44</sup> |
| <i>CIQTNF6</i>  | -2.54388 | 4.47381  | 3.21x10 <sup>-46</sup> | 1.54x10 <sup>-44</sup> |
| <i>NPR1</i>     | 2.582333 | 5.525564 | 3.75x10 <sup>-46</sup> | 1.79x10 <sup>-44</sup> |
| <i>GPIHBP1</i>  | 3.533646 | 4.781385 | 4.05x10 <sup>-46</sup> | 1.93x10 <sup>-44</sup> |
| <i>CDT1</i>     | -2.87895 | 3.229674 | 4.28x10 <sup>-46</sup> | 2.03x10 <sup>-44</sup> |
| <i>PTTG1</i>    | -2.40414 | 3.796917 | 4.58x10 <sup>-46</sup> | 2.16x10 <sup>-44</sup> |
| <i>PBK</i>      | -3.83043 | 2.631589 | 4.83x10 <sup>-46</sup> | 2.27x10 <sup>-44</sup> |
| <i>ADCY4</i>    | 2.0324   | 3.841981 | 9.20x10 <sup>-46</sup> | 4.32x10 <sup>-44</sup> |
| <i>ASF1B</i>    | -2.49205 | 3.659556 | 1.49x10 <sup>-45</sup> | 6.95x10 <sup>-44</sup> |
| <i>ADAM12</i>   | -3.67905 | 4.457312 | 1.55x10 <sup>-45</sup> | 7.24x10 <sup>-44</sup> |
| <i>C19orf59</i> | 4.095663 | 6.403242 | 2.06x10 <sup>-45</sup> | 9.57x10 <sup>-44</sup> |
| <i>SLC5A9</i>   | 3.904511 | 2.689909 | 2.34x10 <sup>-45</sup> | 1.08x10 <sup>-43</sup> |
| <i>THBS2</i>    | -3.6333  | 7.561445 | 2.63x10 <sup>-45</sup> | 1.21x10 <sup>-43</sup> |

|                  |          |          |                        |                        |
|------------------|----------|----------|------------------------|------------------------|
| <i>ANKRD22</i>   | -3.07479 | 4.307795 | 2.66x10 <sup>-45</sup> | 1.22x10 <sup>-43</sup> |
| <i>KPNA2</i>     | -2.191   | 6.37447  | 3.32x10 <sup>-45</sup> | 1.51x10 <sup>-43</sup> |
| <i>CDO1</i>      | 2.699376 | 2.801539 | 5.48x10 <sup>-45</sup> | 2.47x10 <sup>-43</sup> |
| <i>TPBG</i>      | -2.10725 | 4.918862 | 5.96x10 <sup>-45</sup> | 2.67x10 <sup>-43</sup> |
| <i>LRRC36</i>    | 3.643382 | 3.681687 | 6.06x10 <sup>-45</sup> | 2.71x10 <sup>-43</sup> |
| <i>ARHGAP11A</i> | -2.35159 | 3.710549 | 7.34x10 <sup>-45</sup> | 3.26x10 <sup>-43</sup> |
| <i>C14orf132</i> | 2.280578 | 5.926994 | 7.70x10 <sup>-45</sup> | 3.41x10 <sup>-43</sup> |
| <i>CDK1</i>      | -2.66271 | 4.522638 | 7.86x10 <sup>-45</sup> | 3.47x10 <sup>-43</sup> |
| <i>SEMA6A</i>    | 2.580365 | 4.896538 | 8.03x10 <sup>-45</sup> | 3.54x10 <sup>-43</sup> |
| <i>MYBL2</i>     | -4.17115 | 5.040625 | 9.15x10 <sup>-45</sup> | 4.02x10 <sup>-43</sup> |
| <i>CD300LG</i>   | 5.272634 | 3.38445  | 1.07x10 <sup>-44</sup> | 4.67x10 <sup>-43</sup> |
| <i>AURKB</i>     | -3.55224 | 2.62794  | 1.40x10 <sup>-44</sup> | 6.11x10 <sup>-43</sup> |
| <i>LRRN3</i>     | 3.010754 | 3.147829 | 1.70x10 <sup>-44</sup> | 7.40x10 <sup>-43</sup> |
| <i>MMP11</i>     | -5.62187 | 6.529732 | 1.79x10 <sup>-44</sup> | 7.77x10 <sup>-43</sup> |
| <i>ATP10B</i>    | -5.56352 | 2.978922 | 2.37x10 <sup>-44</sup> | 1.02x10 <sup>-42</sup> |
| <i>CRYAB</i>     | 2.162392 | 4.357123 | 2.44x10 <sup>-44</sup> | 1.05x10 <sup>-42</sup> |
| <i>SCN4B</i>     | 2.73533  | 4.653607 | 2.97x10 <sup>-44</sup> | 1.27x10 <sup>-42</sup> |
| <i>SYT7</i>      | -3.16802 | 4.954181 | 3.46x10 <sup>-44</sup> | 1.48x10 <sup>-42</sup> |
| <i>GINS4</i>     | -3.00998 | 2.887395 | 3.51x10 <sup>-44</sup> | 1.49x10 <sup>-42</sup> |
| <i>PFKP</i>      | -2.36977 | 6.781632 | 7.43x10 <sup>-44</sup> | 3.14x10 <sup>-42</sup> |
| <i>PEAR1</i>     | 2.010554 | 4.062214 | 8.12x10 <sup>-44</sup> | 3.40x10 <sup>-42</sup> |
| <i>SHCBP1</i>    | -2.6954  | 2.97647  | 1.01x10 <sup>-43</sup> | 4.21x10 <sup>-42</sup> |
| <i>MANEAL</i>    | -2.13284 | 4.225674 | 1.08x10 <sup>-43</sup> | 4.49x10 <sup>-42</sup> |
| <i>SLC6A4</i>    | 6.693531 | 6.445339 | 1.19x10 <sup>-43</sup> | 4.92x10 <sup>-42</sup> |
| <i>CCRL1</i>     | 2.768634 | 3.040042 | 1.62x10 <sup>-43</sup> | 6.64x10 <sup>-42</sup> |
| <i>EGLN3</i>     | -2.95381 | 5.145623 | 1.84x10 <sup>-43</sup> | 7.53x10 <sup>-42</sup> |
| <i>KNTC1</i>     | -2.29638 | 3.887275 | 2.02x10 <sup>-43</sup> | 8.21x10 <sup>-42</sup> |
| <i>THBD</i>      | 2.200005 | 7.207904 | 2.48x10 <sup>-43</sup> | 1.01x10 <sup>-41</sup> |
| <i>GCNT3</i>     | -5.45367 | 4.888895 | 3.42x10 <sup>-43</sup> | 1.38x10 <sup>-41</sup> |

|                  |          |          |                        |                        |
|------------------|----------|----------|------------------------|------------------------|
| <i>SPN</i>       | 2.188501 | 5.968731 | $3.44 \times 10^{-43}$ | $1.38 \times 10^{-41}$ |
| <i>HHIPL2</i>    | -7.35079 | 2.975633 | $4.43 \times 10^{-43}$ | $1.77 \times 10^{-41}$ |
| <i>CCNF</i>      | -2.02265 | 3.548687 | $4.77 \times 10^{-43}$ | $1.90 \times 10^{-41}$ |
| <i>LYPD3</i>     | -3.80758 | 3.737446 | $4.81 \times 10^{-43}$ | $1.91 \times 10^{-41}$ |
| <i>WDHD1</i>     | -2.11622 | 3.282786 | $1.00 \times 10^{-42}$ | $3.95 \times 10^{-41}$ |
| <i>BCL2L15</i>   | -3.71874 | 3.309001 | $1.04 \times 10^{-42}$ | $4.07 \times 10^{-41}$ |
| <i>GLIPR2</i>    | 2.019564 | 6.678118 | $1.26 \times 10^{-42}$ | $4.94 \times 10^{-41}$ |
| <i>PRAMI</i>     | 2.498961 | 3.713474 | $1.38 \times 10^{-42}$ | $5.38 \times 10^{-41}$ |
| <i>TYMS</i>      | -2.28295 | 4.316875 | $1.55 \times 10^{-42}$ | $6.02 \times 10^{-41}$ |
| <i>STYK1</i>     | -2.80748 | 2.533606 | $2.63 \times 10^{-42}$ | $9.99 \times 10^{-41}$ |
| <i>TGFBR3</i>    | 2.442564 | 5.849298 | $2.79 \times 10^{-42}$ | $1.06 \times 10^{-40}$ |
| <i>C1orf106</i>  | -2.4238  | 5.878984 | $5.82 \times 10^{-42}$ | $2.17 \times 10^{-40}$ |
| <i>HIST1H2BD</i> | -2.39116 | 3.51828  | $5.86 \times 10^{-42}$ | $2.18 \times 10^{-40}$ |
| <i>MLF1IP</i>    | -2.35841 | 3.565187 | $6.29 \times 10^{-42}$ | $2.33 \times 10^{-40}$ |
| <i>STEAP1</i>    | -3.1261  | 4.084453 | $6.74 \times 10^{-42}$ | $2.49 \times 10^{-40}$ |
| <i>ADAM8</i>     | -2.53819 | 5.656137 | $6.83 \times 10^{-42}$ | $2.52 \times 10^{-40}$ |
| <i>SPDEF</i>     | -3.3833  | 4.657649 | $7.42 \times 10^{-42}$ | $2.73 \times 10^{-40}$ |
| <i>ACADL</i>     | 3.584059 | 3.819661 | $7.90 \times 10^{-42}$ | $2.89 \times 10^{-40}$ |
| <i>HS6ST2</i>    | -3.78122 | 4.764379 | $1.01 \times 10^{-41}$ | $3.68 \times 10^{-40}$ |
| <i>COL11A1</i>   | -7.5905  | 5.871438 | $1.01 \times 10^{-41}$ | $3.70 \times 10^{-40}$ |
| <i>C8orf84</i>   | 2.808342 | 3.532538 | $1.08 \times 10^{-41}$ | $3.90 \times 10^{-40}$ |
| <i>ECE2</i>      | -2.00308 | 2.979864 | $2.15 \times 10^{-41}$ | $7.63 \times 10^{-40}$ |
| <i>SOX17</i>     | 2.651874 | 3.158371 | $2.59 \times 10^{-41}$ | $9.17 \times 10^{-40}$ |
| <i>FUT2</i>      | -3.11722 | 3.696013 | $3.43 \times 10^{-41}$ | $1.20 \times 10^{-39}$ |
| <i>TMEM100</i>   | 4.22623  | 6.450295 | $3.76 \times 10^{-41}$ | $1.31 \times 10^{-39}$ |
| <i>GOLGA7B</i>   | -2.79273 | 3.641749 | $3.89 \times 10^{-41}$ | $1.36 \times 10^{-39}$ |
| <i>CNTN6</i>     | 4.177826 | 3.047445 | $4.23 \times 10^{-41}$ | $1.47 \times 10^{-39}$ |
| <i>MARCKSL1</i>  | -2.1557  | 7.264848 | $4.24 \times 10^{-41}$ | $1.47 \times 10^{-39}$ |
| <i>P2RY6</i>     | -2.99366 | 3.37816  | $4.50 \times 10^{-41}$ | $1.55 \times 10^{-39}$ |

|                  |          |          |                        |                        |
|------------------|----------|----------|------------------------|------------------------|
| <i>EPHB2</i>     | -2.69624 | 4.850972 | 6.61x10 <sup>-41</sup> | 2.27x10 <sup>-39</sup> |
| <i>FHL5</i>      | 2.726806 | 3.082521 | 9.79x10 <sup>-41</sup> | 3.33x10 <sup>-39</sup> |
| <i>GPA33</i>     | 3.649989 | 3.390738 | 1.20x10 <sup>-40</sup> | 4.08x10 <sup>-39</sup> |
| <i>BMP8A</i>     | -2.72959 | 3.094729 | 1.24x10 <sup>-40</sup> | 4.21x10 <sup>-39</sup> |
| <i>MASP1</i>     | 3.053975 | 3.264876 | 1.97x10 <sup>-40</sup> | 6.60x10 <sup>-39</sup> |
| <i>EPN3</i>      | -3.13178 | 3.406064 | 2.82x10 <sup>-40</sup> | 9.33x10 <sup>-39</sup> |
| <i>CCNE2</i>     | -2.56902 | 2.62503  | 3.47x10 <sup>-40</sup> | 1.14x10 <sup>-38</sup> |
| <i>CD52</i>      | 2.478082 | 6.986179 | 4.65x10 <sup>-40</sup> | 1.51x10 <sup>-38</sup> |
| <i>PLAU</i>      | -3.24816 | 7.397662 | 4.93x10 <sup>-40</sup> | 1.59x10 <sup>-38</sup> |
| <i>BCHE</i>      | 2.732457 | 3.15574  | 8.07x10 <sup>-40</sup> | 2.57x10 <sup>-38</sup> |
| <i>RAC3</i>      | -2.28257 | 2.958848 | 8.22x10 <sup>-40</sup> | 2.62x10 <sup>-38</sup> |
| <i>ADAMTS8</i>   | 3.484225 | 4.930884 | 1.50x10 <sup>-39</sup> | 4.74x10 <sup>-38</sup> |
| <i>CA4</i>       | 4.883847 | 4.443482 | 1.61x10 <sup>-39</sup> | 5.05x10 <sup>-38</sup> |
| <i>PLK4</i>      | -2.36864 | 2.560337 | 1.70x10 <sup>-39</sup> | 5.30x10 <sup>-38</sup> |
| <i>KRT80</i>     | -2.52279 | 5.371618 | 2.00x10 <sup>-39</sup> | 6.20x10 <sup>-38</sup> |
| <i>PLXNB3</i>    | -3.36835 | 3.603864 | 2.42x10 <sup>-39</sup> | 7.48x10 <sup>-38</sup> |
| <i>SLC7A5</i>    | -2.55384 | 6.281982 | 2.61x10 <sup>-39</sup> | 8.08x10 <sup>-38</sup> |
| <i>HSPB8</i>     | 2.008715 | 6.113874 | 2.66x10 <sup>-39</sup> | 8.22x10 <sup>-38</sup> |
| <i>MGAT3</i>     | 3.015675 | 5.370067 | 3.03x10 <sup>-39</sup> | 9.33x10 <sup>-38</sup> |
| <i>CLEC1A</i>    | 2.098356 | 3.067378 | 3.52x10 <sup>-39</sup> | 1.08x10 <sup>-37</sup> |
| <i>LRP2BP</i>    | 2.162271 | 3.019225 | 5.05x10 <sup>-39</sup> | 1.53x10 <sup>-37</sup> |
| <i>TFAP2A</i>    | -4.06497 | 3.204143 | 5.30x10 <sup>-39</sup> | 1.60x10 <sup>-37</sup> |
| <i>GDF10</i>     | 3.235143 | 4.06979  | 7.99x10 <sup>-39</sup> | 2.40x10 <sup>-37</sup> |
| <i>C10orf116</i> | 2.718265 | 6.650284 | 1.37x10 <sup>-38</sup> | 4.06x10 <sup>-37</sup> |
| <i>PVRL4</i>     | -2.27719 | 5.325718 | 1.43x10 <sup>-38</sup> | 4.25x10 <sup>-37</sup> |
| <i>MS4A7</i>     | 2.125747 | 6.506158 | 1.51x10 <sup>-38</sup> | 4.46x10 <sup>-37</sup> |
| <i>GRIA1</i>     | 3.961961 | 3.575827 | 1.79x10 <sup>-38</sup> | 5.26x10 <sup>-37</sup> |
| <i>UNC5CL</i>    | -2.89606 | 2.920857 | 1.83x10 <sup>-38</sup> | 5.35x10 <sup>-37</sup> |
| <i>SPP1</i>      | -4.87192 | 8.505926 | 2.27x10 <sup>-38</sup> | 6.63x10 <sup>-37</sup> |

|                  |          |          |                        |                        |
|------------------|----------|----------|------------------------|------------------------|
| <i>MYO7A</i>     | -2.13959 | 3.25145  | 3.57x10 <sup>-38</sup> | 1.04x10 <sup>-36</sup> |
| <i>LMNB1</i>     | -2.08565 | 5.078839 | 3.75x10 <sup>-38</sup> | 1.08x10 <sup>-36</sup> |
| <i>SEMA6D</i>    | 2.430487 | 3.878954 | 3.84x10 <sup>-38</sup> | 1.11x10 <sup>-36</sup> |
| <i>ADAMTSL4</i>  | 2.046398 | 6.244168 | 4.05x10 <sup>-38</sup> | 1.17x10 <sup>-36</sup> |
| <i>MME</i>       | 2.678643 | 6.000617 | 4.12x10 <sup>-38</sup> | 1.18x10 <sup>-36</sup> |
| <i>SULF1</i>     | -3.10928 | 7.162575 | 4.17x10 <sup>-38</sup> | 1.19x10 <sup>-36</sup> |
| <i>ABCC3</i>     | -2.27251 | 6.964919 | 6.90x10 <sup>-38</sup> | 1.95x10 <sup>-36</sup> |
| <i>GYLTL1B</i>   | -2.20265 | 4.004284 | 9.40x10 <sup>-38</sup> | 2.64x10 <sup>-36</sup> |
| <i>TNXB</i>      | 2.854058 | 7.274064 | 1.01x10 <sup>-37</sup> | 2.82x10 <sup>-36</sup> |
| <i>ANKRD1</i>    | 4.733098 | 5.462986 | 1.09x10 <sup>-37</sup> | 3.03x10 <sup>-36</sup> |
| <i>PDZD2</i>     | 2.33247  | 6.173694 | 1.22x10 <sup>-37</sup> | 3.37x10 <sup>-36</sup> |
| <i>SRPX2</i>     | -2.87814 | 4.527898 | 1.30x10 <sup>-37</sup> | 3.61x10 <sup>-36</sup> |
| <i>EPHX3</i>     | -2.33247 | 3.49065  | 1.42x10 <sup>-37</sup> | 3.93x10 <sup>-36</sup> |
| <i>MFAP4</i>     | 2.368803 | 8.37229  | 1.95x10 <sup>-37</sup> | 5.35x10 <sup>-36</sup> |
| <i>KIAA1524</i>  | -2.40146 | 2.625134 | 2.09x10 <sup>-37</sup> | 5.72x10 <sup>-36</sup> |
| <i>SYT15</i>     | 2.908772 | 5.166103 | 2.17x10 <sup>-37</sup> | 5.93x10 <sup>-36</sup> |
| <i>DLC1</i>      | 2.231588 | 7.87808  | 2.19x10 <sup>-37</sup> | 5.96x10 <sup>-36</sup> |
| <i>C14orf139</i> | 2.008782 | 3.001892 | 3.40x10 <sup>-37</sup> | 9.18x10 <sup>-36</sup> |
| <i>SBK1</i>      | -2.58313 | 4.253354 | 3.68x10 <sup>-37</sup> | 9.89x10 <sup>-36</sup> |
| <i>BEAN</i>      | -3.53729 | 2.681753 | 4.17x10 <sup>-37</sup> | 1.12x10 <sup>-35</sup> |
| <i>MAMDC2</i>    | 2.696251 | 5.281048 | 4.70x10 <sup>-37</sup> | 1.25x10 <sup>-35</sup> |
| <i>COL5A2</i>    | -2.76228 | 7.483841 | 6.01x10 <sup>-37</sup> | 1.59x10 <sup>-35</sup> |
| <i>HTR3A</i>     | -6.64864 | 2.783094 | 6.70x10 <sup>-37</sup> | 1.77x10 <sup>-35</sup> |
| <i>PHACTR1</i>   | 2.296141 | 3.277039 | 6.76x10 <sup>-37</sup> | 1.78x10 <sup>-35</sup> |
| <i>WDR62</i>     | -2.62231 | 2.705858 | 8.50x10 <sup>-37</sup> | 2.23x10 <sup>-35</sup> |
| <i>OLR1</i>      | 2.582257 | 6.780139 | 9.31x10 <sup>-37</sup> | 2.43x10 <sup>-35</sup> |
| <i>CSRNP1</i>    | 2.229768 | 7.371593 | 1.19x10 <sup>-36</sup> | 3.08x10 <sup>-35</sup> |
| <i>VEPH1</i>     | 2.763316 | 5.089576 | 1.42x10 <sup>-36</sup> | 3.68x10 <sup>-35</sup> |
| <i>ABI3BP</i>    | 2.399618 | 6.418575 | 1.60x10 <sup>-36</sup> | 4.14x10 <sup>-35</sup> |

|                 |          |          |                        |                        |
|-----------------|----------|----------|------------------------|------------------------|
| <i>GPX3</i>     | 2.200038 | 9.330486 | $3.44 \times 10^{-36}$ | $8.76 \times 10^{-35}$ |
| <i>CDH3</i>     | -3.19979 | 6.539753 | $3.70 \times 10^{-36}$ | $9.40 \times 10^{-35}$ |
| <i>FAM162B</i>  | 2.26354  | 2.633945 | $4.56 \times 10^{-36}$ | $1.16 \times 10^{-34}$ |
| <i>CDKN2A</i>   | -3.6005  | 3.579223 | $5.57 \times 10^{-36}$ | $1.40 \times 10^{-34}$ |
| <i>CCDC141</i>  | 3.283325 | 2.800086 | $5.90 \times 10^{-36}$ | $1.48 \times 10^{-34}$ |
| <i>SELP</i>     | 2.297376 | 4.437471 | $8.57 \times 10^{-36}$ | $2.14 \times 10^{-34}$ |
| <i>SIRPB1</i>   | 2.254941 | 4.780988 | $1.01 \times 10^{-35}$ | $2.49 \times 10^{-34}$ |
| <i>TMEM132A</i> | -2.3023  | 5.410544 | $1.44 \times 10^{-35}$ | $3.53 \times 10^{-34}$ |
| <i>DNAJC12</i>  | -3.56364 | 2.964645 | $1.49 \times 10^{-35}$ | $3.63 \times 10^{-34}$ |
| <i>FXYD1</i>    | 2.748571 | 3.212587 | $1.70 \times 10^{-35}$ | $4.13 \times 10^{-34}$ |
| <i>ADAMTSL3</i> | 2.210654 | 4.322661 | $1.79 \times 10^{-35}$ | $4.36 \times 10^{-34}$ |
| <i>MFI2</i>     | -3.82833 | 3.671173 | $1.81 \times 10^{-35}$ | $4.41 \times 10^{-34}$ |
| <i>CILP2</i>    | -4.09757 | 3.361334 | $1.98 \times 10^{-35}$ | $4.80 \times 10^{-34}$ |
| <i>COL1A1</i>   | -3.40366 | 11.1811  | $2.65 \times 10^{-35}$ | $6.35 \times 10^{-34}$ |
| <i>ARNTL2</i>   | -3.10407 | 3.053256 | $2.77 \times 10^{-35}$ | $6.62 \times 10^{-34}$ |
| <i>ABP1</i>     | -4.77299 | 4.203675 | $4.70 \times 10^{-35}$ | $1.12 \times 10^{-33}$ |
| <i>LYVE1</i>    | 2.725627 | 5.219167 | $4.76 \times 10^{-35}$ | $1.13 \times 10^{-33}$ |
| <i>TRIP13</i>   | -2.9518  | 3.875055 | $7.28 \times 10^{-35}$ | $1.71 \times 10^{-33}$ |
| <i>TBX4</i>     | 2.072008 | 4.756898 | $7.31 \times 10^{-35}$ | $1.72 \times 10^{-33}$ |
| <i>GYG2</i>     | -2.41836 | 3.065416 | $8.79 \times 10^{-35}$ | $2.05 \times 10^{-33}$ |
| <i>LAMP3</i>    | 2.630679 | 8.762665 | $9.25 \times 10^{-35}$ | $2.15 \times 10^{-33}$ |
| <i>LGI2</i>     | -3.07871 | 3.372322 | $1.01 \times 10^{-34}$ | $2.33 \times 10^{-33}$ |
| <i>FGFR4</i>    | 2.694309 | 5.531835 | $1.05 \times 10^{-34}$ | $2.43 \times 10^{-33}$ |
| <i>HBEGF</i>    | 2.324296 | 6.60568  | $1.38 \times 10^{-34}$ | $3.18 \times 10^{-33}$ |
| <i>COL3A1</i>   | -3.12956 | 10.86697 | $1.60 \times 10^{-34}$ | $3.66 \times 10^{-33}$ |
| <i>STRA6</i>    | -4.68041 | 2.899216 | $1.62 \times 10^{-34}$ | $3.70 \times 10^{-33}$ |
| <i>IGF2BP3</i>  | -3.84169 | 3.856068 | $2.38 \times 10^{-34}$ | $5.38 \times 10^{-33}$ |
| <i>SYT12</i>    | -5.3791  | 3.858354 | $2.85 \times 10^{-34}$ | $6.36 \times 10^{-33}$ |
| <i>NLRC4</i>    | 2.014443 | 3.543201 | $2.91 \times 10^{-34}$ | $6.50 \times 10^{-33}$ |

|                 |          |          |                        |                        |
|-----------------|----------|----------|------------------------|------------------------|
| <i>LADI</i>     | -2.0737  | 6.689828 | 3.18x10 <sup>-34</sup> | 7.06x10 <sup>-33</sup> |
| <i>PPP2R2C</i>  | -5.2576  | 2.78755  | 3.40x10 <sup>-34</sup> | 7.53x10 <sup>-33</sup> |
| <i>CEACAM1</i>  | -2.09216 | 5.242892 | 3.57x10 <sup>-34</sup> | 7.87x10 <sup>-33</sup> |
| <i>FUT3</i>     | -2.30524 | 4.426995 | 3.58x10 <sup>-34</sup> | 7.90x10 <sup>-33</sup> |
| <i>PLAC9</i>    | 2.717779 | 3.712557 | 3.98x10 <sup>-34</sup> | 8.74x10 <sup>-33</sup> |
| <i>LRRC32</i>   | 2.074121 | 6.747982 | 4.05x10 <sup>-34</sup> | 8.89x10 <sup>-33</sup> |
| <i>FAM40B</i>   | -2.95847 | 2.727631 | 4.33x10 <sup>-34</sup> | 9.49x10 <sup>-33</sup> |
| <i>SOX7</i>     | 2.615188 | 4.902121 | 4.65x10 <sup>-34</sup> | 1.01x10 <sup>-32</sup> |
| <i>SLIT2</i>    | 2.124241 | 5.606119 | 5.06x10 <sup>-34</sup> | 1.10x10 <sup>-32</sup> |
| <i>DES</i>      | 3.094904 | 5.755882 | 5.95x10 <sup>-34</sup> | 1.29x10 <sup>-32</sup> |
| <i>ARC</i>      | 3.50796  | 2.917811 | 7.82x10 <sup>-34</sup> | 1.69x10 <sup>-32</sup> |
| <i>BARX2</i>    | -4.95249 | 3.471428 | 1.09x10 <sup>-33</sup> | 2.34x10 <sup>-32</sup> |
| <i>NXPH3</i>    | 2.121531 | 3.125913 | 1.68x10 <sup>-33</sup> | 3.57x10 <sup>-32</sup> |
| <i>FGR</i>      | 2.036895 | 5.827885 | 1.91x10 <sup>-33</sup> | 4.03x10 <sup>-32</sup> |
| <i>SLC29A4</i>  | -2.99716 | 3.717852 | 2.07x10 <sup>-33</sup> | 4.36x10 <sup>-32</sup> |
| <i>IL20RB</i>   | -4.36432 | 2.650632 | 2.15x10 <sup>-33</sup> | 4.52x10 <sup>-32</sup> |
| <i>PODNL1</i>   | -2.97258 | 3.103188 | 2.37x10 <sup>-33</sup> | 4.97x10 <sup>-32</sup> |
| <i>ANGPT1</i>   | 2.251094 | 5.115685 | 3.17x10 <sup>-33</sup> | 6.58x10 <sup>-32</sup> |
| <i>GNG4</i>     | -4.92928 | 3.109396 | 3.76x10 <sup>-33</sup> | 7.78x10 <sup>-32</sup> |
| <i>PITX1</i>    | -4.60452 | 3.099099 | 5.39x10 <sup>-33</sup> | 1.10x10 <sup>-31</sup> |
| <i>TNS4</i>     | -4.41188 | 4.608931 | 5.59x10 <sup>-33</sup> | 1.14x10 <sup>-31</sup> |
| <i>SLC6A8</i>   | -2.19889 | 5.065981 | 5.83x10 <sup>-33</sup> | 1.19x10 <sup>-31</sup> |
| <i>RPL39L</i>   | -2.5935  | 3.383523 | 8.57x10 <sup>-33</sup> | 1.72x10 <sup>-31</sup> |
| <i>XAGE1D</i>   | -5.95336 | 6.642826 | 9.92x10 <sup>-33</sup> | 1.99x10 <sup>-31</sup> |
| <i>GHR</i>      | 2.016857 | 2.552053 | 1.84x10 <sup>-32</sup> | 3.62x10 <sup>-31</sup> |
| <i>MAP7D2</i>   | -4.13916 | 2.823014 | 1.99x10 <sup>-32</sup> | 3.91x10 <sup>-31</sup> |
| <i>C6orf174</i> | 2.498053 | 4.323157 | 2.00x10 <sup>-32</sup> | 3.92x10 <sup>-31</sup> |
| <i>ADAM28</i>   | -2.70604 | 4.173643 | 2.17x10 <sup>-32</sup> | 4.23x10 <sup>-31</sup> |
| <i>ABCA8</i>    | 2.963368 | 5.124509 | 3.15x10 <sup>-32</sup> | 6.08x10 <sup>-31</sup> |

|                  |          |          |                        |                        |
|------------------|----------|----------|------------------------|------------------------|
| <i>OSCAR</i>     | 2.179959 | 5.113255 | $3.52 \times 10^{-32}$ | $6.75 \times 10^{-31}$ |
| <i>SPOCK1</i>    | -3.72333 | 3.584749 | $3.69 \times 10^{-32}$ | $7.07 \times 10^{-31}$ |
| <i>FAP</i>       | -2.77422 | 4.460515 | $4.09 \times 10^{-32}$ | $7.81 \times 10^{-31}$ |
| <i>FAM83D</i>    | -2.51658 | 3.483818 | $4.59 \times 10^{-32}$ | $8.75 \times 10^{-31}$ |
| <i>COL5A1</i>    | -2.51313 | 8.041652 | $7.71 \times 10^{-32}$ | $1.45 \times 10^{-30}$ |
| <i>ITGA11</i>    | -3.71599 | 5.180785 | $8.28 \times 10^{-32}$ | $1.55 \times 10^{-30}$ |
| <i>PPAP2C</i>    | -2.32516 | 5.63694  | $8.83 \times 10^{-32}$ | $1.65 \times 10^{-30}$ |
| <i>SI00P</i>     | -4.85185 | 6.8783   | $1.31 \times 10^{-31}$ | $2.41 \times 10^{-30}$ |
| <i>CBX2</i>      | -2.64686 | 3.495549 | $1.40 \times 10^{-31}$ | $2.59 \times 10^{-30}$ |
| <i>INHA</i>      | -6.78285 | 2.71534  | $1.90 \times 10^{-31}$ | $3.46 \times 10^{-30}$ |
| <i>PAEP</i>      | -8.0084  | 5.462616 | $2.21 \times 10^{-31}$ | $4.02 \times 10^{-30}$ |
| <i>DKK2</i>      | 2.171738 | 3.627928 | $2.37 \times 10^{-31}$ | $4.31 \times 10^{-30}$ |
| <i>C2CD4A</i>    | -3.87738 | 2.985836 | $2.42 \times 10^{-31}$ | $4.38 \times 10^{-30}$ |
| <i>RAD51AP1</i>  | -2.16427 | 2.594273 | $3.04 \times 10^{-31}$ | $5.48 \times 10^{-30}$ |
| <i>MC1R</i>      | -2.00338 | 2.741399 | $3.60 \times 10^{-31}$ | $6.48 \times 10^{-30}$ |
| <i>CFP</i>       | 2.057108 | 3.251517 | $3.63 \times 10^{-31}$ | $6.51 \times 10^{-30}$ |
| <i>CPS1</i>      | -6.68394 | 6.563564 | $4.39 \times 10^{-31}$ | $7.84 \times 10^{-30}$ |
| <i>RPL13AP17</i> | 4.37679  | 2.923716 | $5.25 \times 10^{-31}$ | $9.35 \times 10^{-30}$ |
| <i>RTN4RL2</i>   | -3.01745 | 2.503731 | $5.69 \times 10^{-31}$ | $1.01 \times 10^{-29}$ |
| <i>NQO1</i>      | -3.23167 | 7.810012 | $6.13 \times 10^{-31}$ | $1.08 \times 10^{-29}$ |
| <i>DUSP4</i>     | -2.61776 | 4.913351 | $6.39 \times 10^{-31}$ | $1.13 \times 10^{-29}$ |
| <i>MMP1</i>      | -4.99525 | 5.642243 | $7.82 \times 10^{-31}$ | $1.37 \times 10^{-29}$ |
| <i>KRT81</i>     | -6.08385 | 4.390675 | $8.53 \times 10^{-31}$ | $1.49 \times 10^{-29}$ |
| <i>ADRB1</i>     | 3.257033 | 4.131586 | $1.53 \times 10^{-30}$ | $2.63 \times 10^{-29}$ |
| <i>WISP1</i>     | -2.61277 | 3.025197 | $1.72 \times 10^{-30}$ | $2.96 \times 10^{-29}$ |
| <i>CA9</i>       | -6.87219 | 4.44203  | $2.08 \times 10^{-30}$ | $3.55 \times 10^{-29}$ |
| <i>C8orf73</i>   | -2.23491 | 4.380236 | $2.24 \times 10^{-30}$ | $3.81 \times 10^{-29}$ |
| <i>GLDN</i>      | 2.653772 | 4.377068 | $2.37 \times 10^{-30}$ | $4.03 \times 10^{-29}$ |
| <i>SOX11</i>     | -6.23537 | 2.767129 | $3.03 \times 10^{-30}$ | $5.11 \times 10^{-29}$ |



|                 |          |          |                        |                        |
|-----------------|----------|----------|------------------------|------------------------|
| <i>SMOC1</i>    | -4.30246 | 3.974401 | 3.27x10 <sup>-30</sup> | 5.49x10 <sup>-29</sup> |
| <i>PANX2</i>    | -2.3585  | 3.222701 | 3.94x10 <sup>-30</sup> | 6.56x10 <sup>-29</sup> |
| <i>GPRIN2</i>   | 2.357432 | 5.361947 | 3.94x10 <sup>-30</sup> | 6.56x10 <sup>-29</sup> |
| <i>BOP1</i>     | -2.09581 | 3.602667 | 5.60x10 <sup>-30</sup> | 9.25x10 <sup>-29</sup> |
| <i>FGL1</i>     | -6.87638 | 4.18467  | 5.86x10 <sup>-30</sup> | 9.68x10 <sup>-29</sup> |
| <i>GPX2</i>     | -6.04859 | 5.866091 | 5.94x10 <sup>-30</sup> | 9.79x10 <sup>-29</sup> |
| <i>LGI3</i>     | 4.233729 | 5.683218 | 7.33x10 <sup>-30</sup> | 1.20x10 <sup>-28</sup> |
| <i>FNDC1</i>    | -3.31441 | 5.412804 | 1.07x10 <sup>-29</sup> | 1.73x10 <sup>-28</sup> |
| <i>MXRA5</i>    | -2.35498 | 7.160647 | 1.67x10 <sup>-29</sup> | 2.66x10 <sup>-28</sup> |
| <i>TUBB2B</i>   | -4.50984 | 3.119488 | 1.67x10 <sup>-29</sup> | 2.66x10 <sup>-28</sup> |
| <i>COL6A6</i>   | 2.698307 | 4.917919 | 2.76x10 <sup>-29</sup> | 4.35x10 <sup>-28</sup> |
| <i>GPM6A</i>    | 3.662262 | 5.136422 | 2.91x10 <sup>-29</sup> | 4.57x10 <sup>-28</sup> |
| <i>FA2H</i>     | -2.54968 | 4.07099  | 2.97x10 <sup>-29</sup> | 4.67x10 <sup>-28</sup> |
| <i>COL4A3</i>   | 2.719591 | 5.10929  | 3.12x10 <sup>-29</sup> | 4.88x10 <sup>-28</sup> |
| <i>CFD</i>      | 2.279418 | 6.202302 | 3.27x10 <sup>-29</sup> | 5.10x10 <sup>-28</sup> |
| <i>CP</i>       | -3.55542 | 8.105739 | 3.62x10 <sup>-29</sup> | 5.63x10 <sup>-28</sup> |
| <i>LPL</i>      | 2.479169 | 7.216827 | 3.88x10 <sup>-29</sup> | 6.01x10 <sup>-28</sup> |
| <i>SPTB</i>     | -3.27165 | 4.785077 | 4.01x10 <sup>-29</sup> | 6.19x10 <sup>-28</sup> |
| <i>ADAMTS1</i>  | 2.1079   | 7.009283 | 4.25x10 <sup>-29</sup> | 6.55x10 <sup>-28</sup> |
| <i>BARX1</i>    | -7.61341 | 3.023737 | 4.54x10 <sup>-29</sup> | 6.99x10 <sup>-28</sup> |
| <i>FIGF</i>     | 3.577826 | 4.949706 | 5.02x10 <sup>-29</sup> | 7.72x10 <sup>-28</sup> |
| <i>KIAA1683</i> | 2.855201 | 4.182609 | 5.70x10 <sup>-29</sup> | 8.73x10 <sup>-28</sup> |
| <i>MMP13</i>    | -6.77904 | 4.620044 | 9.23x10 <sup>-29</sup> | 1.38x10 <sup>-27</sup> |
| <i>ODZ4</i>     | -2.3449  | 3.857201 | 9.59x10 <sup>-29</sup> | 1.44x10 <sup>-27</sup> |
| <i>C15orf48</i> | -3.41735 | 5.461957 | 1.50x10 <sup>-28</sup> | 2.22x10 <sup>-27</sup> |
| <i>MDGA1</i>    | 2.091964 | 3.77661  | 1.61x10 <sup>-28</sup> | 2.37x10 <sup>-27</sup> |
| <i>FAM101A</i>  | -3.41555 | 2.66363  | 2.27x10 <sup>-28</sup> | 3.32x10 <sup>-27</sup> |
| <i>ABCC2</i>    | -5.43727 | 2.937864 | 2.97x10 <sup>-28</sup> | 4.34x10 <sup>-27</sup> |
| <i>DSP</i>      | -2.35894 | 8.113357 | 4.03x10 <sup>-28</sup> | 5.83x10 <sup>-27</sup> |

|                  |          |          |                        |                        |
|------------------|----------|----------|------------------------|------------------------|
| <i>ITIH5</i>     | 2.043262 | 5.565846 | 4.51x10 <sup>-28</sup> | 6.50x10 <sup>-27</sup> |
| <i>GJB3</i>      | -3.67737 | 3.282108 | 4.64x10 <sup>-28</sup> | 6.69x10 <sup>-27</sup> |
| <i>PLOD2</i>     | -2.40063 | 6.613971 | 5.13x10 <sup>-28</sup> | 7.38x10 <sup>-27</sup> |
| <i>GPR87</i>     | -4.63493 | 3.052481 | 5.74x10 <sup>-28</sup> | 8.23x10 <sup>-27</sup> |
| <i>CDK5R1</i>    | -2.17205 | 2.682974 | 5.83x10 <sup>-28</sup> | 8.35x10 <sup>-27</sup> |
| <i>TESC</i>      | -3.39234 | 5.251577 | 8.02x10 <sup>-28</sup> | 1.14x10 <sup>-26</sup> |
| <i>AIM2</i>      | -3.66812 | 3.11484  | 8.64x10 <sup>-28</sup> | 1.22x10 <sup>-26</sup> |
| <i>AATK</i>      | 2.285609 | 4.626126 | 8.75x10 <sup>-28</sup> | 1.23x10 <sup>-26</sup> |
| <i>COL7A1</i>    | -3.54111 | 3.109113 | 8.93x10 <sup>-28</sup> | 1.26x10 <sup>-26</sup> |
| <i>LOC149620</i> | 4.927388 | 2.988728 | 9.47x10 <sup>-28</sup> | 1.33x10 <sup>-26</sup> |
| <i>XKRX</i>      | -2.72615 | 2.98841  | 9.96x10 <sup>-28</sup> | 1.40x10 <sup>-26</sup> |
| <i>PDK4</i>      | 2.414236 | 7.258987 | 1.14x10 <sup>-27</sup> | 1.59x10 <sup>-26</sup> |
| <i>TFF1</i>      | -10.1548 | 5.513318 | 1.39x10 <sup>-27</sup> | 1.93x10 <sup>-26</sup> |
| <i>KRT4</i>      | 3.814787 | 4.579097 | 1.41x10 <sup>-27</sup> | 1.95x10 <sup>-26</sup> |
| <i>MMP12</i>     | -4.61803 | 4.474453 | 1.42x10 <sup>-27</sup> | 1.96x10 <sup>-26</sup> |
| <i>DTL</i>       | -2.20733 | 3.568057 | 1.87x10 <sup>-27</sup> | 2.57x10 <sup>-26</sup> |
| <i>HES6</i>      | -3.20895 | 4.132306 | 2.21x10 <sup>-27</sup> | 3.02x10 <sup>-26</sup> |
| <i>CLDN10</i>    | -4.4478  | 3.94563  | 2.23x10 <sup>-27</sup> | 3.04x10 <sup>-26</sup> |
| <i>ADAMTS12</i>  | -2.49923 | 3.235421 | 2.33x10 <sup>-27</sup> | 3.17x10 <sup>-26</sup> |
| <i>VCAN</i>      | -2.29467 | 7.945208 | 2.47x10 <sup>-27</sup> | 3.37x10 <sup>-26</sup> |
| <i>RETN</i>      | 3.463868 | 2.785951 | 3.80x10 <sup>-27</sup> | 5.12x10 <sup>-26</sup> |
| <i>PRAME</i>     | -7.32101 | 3.379457 | 4.20x10 <sup>-27</sup> | 5.64x10 <sup>-26</sup> |
| <i>ABCA9</i>     | 2.176026 | 2.596892 | 4.44x10 <sup>-27</sup> | 5.95x10 <sup>-26</sup> |
| <i>SPINK1</i>    | -6.78558 | 6.55231  | 4.96x10 <sup>-27</sup> | 6.62x10 <sup>-26</sup> |
| <i>SLCIA1</i>    | 2.156681 | 5.824524 | 5.04x10 <sup>-27</sup> | 6.72x10 <sup>-26</sup> |
| <i>MARCO</i>     | 2.766844 | 8.011023 | 6.02x10 <sup>-27</sup> | 8.00x10 <sup>-26</sup> |
| <i>DUOX1</i>     | 2.712008 | 7.172978 | 6.70x10 <sup>-27</sup> | 8.88x10 <sup>-26</sup> |
| <i>LHFPL5</i>    | -4.61967 | -2.52897 | 7.83x10 <sup>-27</sup> | 1.03x10 <sup>-25</sup> |
| <i>PLA2G4F</i>   | 2.704067 | 5.250777 | 8.13x10 <sup>-27</sup> | 1.07x10 <sup>-25</sup> |

|                 |          |          |                        |                        |
|-----------------|----------|----------|------------------------|------------------------|
| <i>CIQTNF7</i>  | 2.236467 | 3.577447 | 8.79x10 <sup>-27</sup> | 1.15x10 <sup>-25</sup> |
| <i>B3GNT6</i>   | -5.94194 | 3.325349 | 9.08x10 <sup>-27</sup> | 1.19x10 <sup>-25</sup> |
| <i>NT5E</i>     | -2.21025 | 5.925591 | 1.10x10 <sup>-26</sup> | 1.42x10 <sup>-25</sup> |
| <i>MAGED4B</i>  | -2.41074 | 3.906356 | 1.33x10 <sup>-26</sup> | 1.72x10 <sup>-25</sup> |
| <i>ABCA4</i>    | -4.15455 | 3.357688 | 1.90x10 <sup>-26</sup> | 2.43x10 <sup>-25</sup> |
| <i>PLA2G4A</i>  | -2.64686 | 5.301608 | 2.00x10 <sup>-26</sup> | 2.54x10 <sup>-25</sup> |
| <i>SLCO1A2</i>  | 4.399059 | 2.571467 | 2.05x10 <sup>-26</sup> | 2.61x10 <sup>-25</sup> |
| <i>MUC13</i>    | -6.01256 | 5.031862 | 2.31x10 <sup>-26</sup> | 2.92x10 <sup>-25</sup> |
| <i>LGSN</i>     | -4.3262  | 3.204225 | 2.32x10 <sup>-26</sup> | 2.93x10 <sup>-25</sup> |
| <i>RADIL</i>    | 2.311062 | 2.919896 | 2.37x10 <sup>-26</sup> | 2.99x10 <sup>-25</sup> |
| <i>HMGA2</i>    | -6.17301 | 3.590592 | 2.43x10 <sup>-26</sup> | 3.07x10 <sup>-25</sup> |
| <i>COL17A1</i>  | -4.78464 | 5.345824 | 2.62x10 <sup>-26</sup> | 3.29x10 <sup>-25</sup> |
| <i>PKHDIL1</i>  | 3.109038 | 2.523058 | 2.63x10 <sup>-26</sup> | 3.30x10 <sup>-25</sup> |
| <i>MUC6</i>     | -8.32821 | 7.073864 | 3.58x10 <sup>-26</sup> | 4.47x10 <sup>-25</sup> |
| <i>QPCT</i>     | -2.57449 | 4.814799 | 5.61x10 <sup>-26</sup> | 6.91x10 <sup>-25</sup> |
| <i>METTL7B</i>  | -2.26108 | 3.146645 | 6.48x10 <sup>-26</sup> | 7.94x10 <sup>-25</sup> |
| <i>SSTR1</i>    | 2.720363 | 3.608697 | 7.05x10 <sup>-26</sup> | 8.62x10 <sup>-25</sup> |
| <i>SLC16A14</i> | -2.88695 | 4.466032 | 8.43x10 <sup>-26</sup> | 1.03x10 <sup>-24</sup> |
| <i>PCDH9</i>    | 2.383859 | 2.641221 | 8.78x10 <sup>-26</sup> | 1.07x10 <sup>-24</sup> |
| <i>RHOV</i>     | -3.48802 | 4.056253 | 9.51x10 <sup>-26</sup> | 1.15x10 <sup>-24</sup> |
| <i>MMRN1</i>    | 2.232702 | 4.906045 | 1.06x10 <sup>-25</sup> | 1.28x10 <sup>-24</sup> |
| <i>ADH1B</i>    | 3.042605 | 8.218403 | 2.10x10 <sup>-25</sup> | 2.48x10 <sup>-24</sup> |
| <i>ARSH</i>     | -4.64328 | -2.70043 | 2.16x10 <sup>-25</sup> | 2.55x10 <sup>-24</sup> |
| <i>CYS1</i>     | 2.068159 | 3.593358 | 2.46x10 <sup>-25</sup> | 2.90x10 <sup>-24</sup> |
| <i>CRTAC1</i>   | 2.665233 | 6.66832  | 2.94x10 <sup>-25</sup> | 3.44x10 <sup>-24</sup> |
| <i>ZBED2</i>    | 2.338239 | 3.844096 | 3.02x10 <sup>-25</sup> | 3.54x10 <sup>-24</sup> |
| <i>APOBEC3B</i> | -2.50925 | 2.948393 | 3.27x10 <sup>-25</sup> | 3.82x10 <sup>-24</sup> |
| <i>GCLC</i>     | -2.5269  | 6.366035 | 3.43x10 <sup>-25</sup> | 3.99x10 <sup>-24</sup> |
| <i>ANKRD29</i>  | 2.334924 | 4.886    | 3.86x10 <sup>-25</sup> | 4.47x10 <sup>-24</sup> |

|                 |          |          |                        |                        |
|-----------------|----------|----------|------------------------|------------------------|
| <i>TCN1</i>     | -6.54539 | 3.710265 | 4.04x10 <sup>-25</sup> | 4.68x10 <sup>-24</sup> |
| <i>RCN3</i>     | -2.05994 | 4.978609 | 4.72x10 <sup>-25</sup> | 5.44x10 <sup>-24</sup> |
| <i>HGD</i>      | -3.96355 | 3.313563 | 4.77x10 <sup>-25</sup> | 5.49x10 <sup>-24</sup> |
| <i>CAPN3</i>    | 2.02237  | 3.585608 | 5.37x10 <sup>-25</sup> | 6.14x10 <sup>-24</sup> |
| <i>PHLDA2</i>   | -2.42374 | 4.254794 | 7.71x10 <sup>-25</sup> | 8.70x10 <sup>-24</sup> |
| <i>CPB2</i>     | 4.146909 | 4.608762 | 8.24x10 <sup>-25</sup> | 9.28x10 <sup>-24</sup> |
| <i>HOXB7</i>    | -2.05544 | 2.758396 | 9.92x10 <sup>-25</sup> | 1.11x10 <sup>-23</sup> |
| <i>UGT8</i>     | -2.45965 | 2.636493 | 1.05x10 <sup>-24</sup> | 1.17x10 <sup>-23</sup> |
| <i>NGEF</i>     | -3.36296 | 2.739382 | 1.08x10 <sup>-24</sup> | 1.21x10 <sup>-23</sup> |
| <i>SLC14A1</i>  | 2.968825 | 2.985224 | 1.24x10 <sup>-24</sup> | 1.38x10 <sup>-23</sup> |
| <i>HBA2</i>     | 3.380104 | 8.57358  | 1.69x10 <sup>-24</sup> | 1.86x10 <sup>-23</sup> |
| <i>GPER</i>     | 2.280383 | 3.20745  | 1.89x10 <sup>-24</sup> | 2.07x10 <sup>-23</sup> |
| <i>IL4I1</i>    | -2.23513 | 3.824132 | 2.56x10 <sup>-24</sup> | 2.79x10 <sup>-23</sup> |
| <i>FGF</i>      | -9.47581 | 7.443708 | 3.14x10 <sup>-24</sup> | 3.38x10 <sup>-23</sup> |
| <i>PCOLCE2</i>  | 2.436465 | 4.453611 | 3.22x10 <sup>-24</sup> | 3.47x10 <sup>-23</sup> |
| <i>ANXA10</i>   | -9.81215 | 3.287955 | 3.35x10 <sup>-24</sup> | 3.60x10 <sup>-23</sup> |
| <i>KIAA1199</i> | -2.63041 | 5.849028 | 4.20x10 <sup>-24</sup> | 4.47x10 <sup>-23</sup> |
| <i>ALDH3B2</i>  | -2.41362 | 2.816955 | 4.44x10 <sup>-24</sup> | 4.72x10 <sup>-23</sup> |
| <i>SLC7A11</i>  | -3.07927 | 4.825499 | 5.32x10 <sup>-24</sup> | 5.62x10 <sup>-23</sup> |
| <i>CDCA7</i>    | -2.48273 | 3.512947 | 5.43x10 <sup>-24</sup> | 5.74x10 <sup>-23</sup> |
| <i>NDRG4</i>    | 2.203508 | 4.456721 | 5.84x10 <sup>-24</sup> | 6.17x10 <sup>-23</sup> |
| <i>HSD17B6</i>  | 2.385949 | 6.135584 | 6.18x10 <sup>-24</sup> | 6.52x10 <sup>-23</sup> |
| <i>CXCL14</i>   | -3.50309 | 5.739744 | 7.75x10 <sup>-24</sup> | 8.09x10 <sup>-23</sup> |
| <i>SCN1A</i>    | 2.538662 | 2.68444  | 8.79x10 <sup>-24</sup> | 9.11x10 <sup>-23</sup> |
| <i>GALNT6</i>   | -2.12041 | 5.693329 | 9.49x10 <sup>-24</sup> | 9.83x10 <sup>-23</sup> |
| <i>MYBPC1</i>   | -8.61998 | 3.188838 | 1.00x10 <sup>-23</sup> | 1.04x10 <sup>-22</sup> |
| <i>LEPREL1</i>  | 2.090173 | 6.17196  | 1.03x10 <sup>-23</sup> | 1.06x10 <sup>-22</sup> |
| <i>DERL3</i>    | -2.29113 | 4.704924 | 1.31x10 <sup>-23</sup> | 1.34x10 <sup>-22</sup> |
| <i>FNDC4</i>    | -2.02895 | 3.08877  | 1.34x10 <sup>-23</sup> | 1.38x10 <sup>-22</sup> |

|                 |          |          |                        |                        |
|-----------------|----------|----------|------------------------|------------------------|
| <i>MUC21</i>    | -4.14845 | 6.275854 | 1.51x10 <sup>-23</sup> | 1.54x10 <sup>-22</sup> |
| <i>HBB</i>      | 3.432372 | 9.079305 | 1.74x10 <sup>-23</sup> | 1.77x10 <sup>-22</sup> |
| <i>LOXL2</i>    | -2.03557 | 5.519293 | 2.28x10 <sup>-23</sup> | 2.30x10 <sup>-22</sup> |
| <i>TOX3</i>     | -2.76472 | 3.957626 | 3.13x10 <sup>-23</sup> | 3.14x10 <sup>-22</sup> |
| <i>AKR1B10</i>  | -7.15397 | 5.196689 | 3.79x10 <sup>-23</sup> | 3.78x10 <sup>-22</sup> |
| <i>CEACAM5</i>  | -4.32011 | 8.601202 | 4.01x10 <sup>-23</sup> | 3.99x10 <sup>-22</sup> |
| <i>SFTPC</i>    | 4.423204 | 13.78501 | 4.02x10 <sup>-23</sup> | 4.00x10 <sup>-22</sup> |
| <i>ELOVL6</i>   | -2.07498 | 3.798399 | 4.41x10 <sup>-23</sup> | 4.37x10 <sup>-22</sup> |
| <i>FABP7</i>    | -9.10144 | 3.983563 | 5.15x10 <sup>-23</sup> | 5.09x10 <sup>-22</sup> |
| <i>SERPINE2</i> | -3.24553 | 6.127658 | 5.71x10 <sup>-23</sup> | 5.62x10 <sup>-22</sup> |
| <i>C8B</i>      | 3.778268 | 3.081883 | 6.48x10 <sup>-23</sup> | 6.36x10 <sup>-22</sup> |
| <i>PLA2G1B</i>  | 3.234892 | 3.412906 | 6.63x10 <sup>-23</sup> | 6.50x10 <sup>-22</sup> |
| <i>EGF</i>      | -2.78785 | 2.736755 | 6.66x10 <sup>-23</sup> | 6.52x10 <sup>-22</sup> |
| <i>AQP4</i>     | 2.885259 | 8.661691 | 8.13x10 <sup>-23</sup> | 7.92x10 <sup>-22</sup> |
| <i>PKIB</i>     | -2.85719 | 3.895033 | 8.59x10 <sup>-23</sup> | 8.36x10 <sup>-22</sup> |
| <i>KIF1A</i>    | -5.85183 | 4.355541 | 8.64x10 <sup>-23</sup> | 8.41x10 <sup>-22</sup> |
| <i>ATP1A2</i>   | 2.470661 | 2.683574 | 1.88x10 <sup>-22</sup> | 1.78x10 <sup>-21</sup> |
| <i>AFF3</i>     | 2.369799 | 4.447504 | 1.93x10 <sup>-22</sup> | 1.83x10 <sup>-21</sup> |
| <i>SLC17A9</i>  | -2.07284 | 3.353188 | 2.02x10 <sup>-22</sup> | 1.92x10 <sup>-21</sup> |
| <i>NTRK2</i>    | 2.740909 | 4.055496 | 2.03x10 <sup>-22</sup> | 1.93x10 <sup>-21</sup> |
| <i>RBP4</i>     | 2.607396 | 4.09182  | 2.58x10 <sup>-22</sup> | 2.42x10 <sup>-21</sup> |
| <i>HSPB6</i>    | 2.082944 | 5.379424 | 2.68x10 <sup>-22</sup> | 2.50x10 <sup>-21</sup> |
| <i>CPXMI</i>    | -2.5346  | 3.506531 | 3.00x10 <sup>-22</sup> | 2.80x10 <sup>-21</sup> |
| <i>ITLN1</i>    | 5.937616 | 5.251381 | 3.21x10 <sup>-22</sup> | 2.98x10 <sup>-21</sup> |
| <i>BDNF</i>     | 2.541508 | 2.761511 | 3.37x10 <sup>-22</sup> | 3.12x10 <sup>-21</sup> |
| <i>HHIP</i>     | 2.849578 | 5.094448 | 3.95x10 <sup>-22</sup> | 3.65x10 <sup>-21</sup> |
| <i>UCHL1</i>    | -3.2691  | 5.116495 | 4.54x10 <sup>-22</sup> | 4.18x10 <sup>-21</sup> |
| <i>C6orf105</i> | 2.100958 | 3.501033 | 4.84x10 <sup>-22</sup> | 4.44x10 <sup>-21</sup> |
| <i>TMEM59L</i>  | -3.84968 | 3.225987 | 6.54x10 <sup>-22</sup> | 5.93x10 <sup>-21</sup> |

|                 |          |          |                        |                        |
|-----------------|----------|----------|------------------------|------------------------|
| <i>TM4SF4</i>   | -5.35873 | 3.873793 | 8.88x10 <sup>-22</sup> | 7.97x10 <sup>-21</sup> |
| <i>REEP6</i>    | -2.11002 | 3.634343 | 9.59x10 <sup>-22</sup> | 8.59x10 <sup>-21</sup> |
| <i>CST1</i>     | -5.88443 | 3.700665 | 1.24x10 <sup>-21</sup> | 1.10x10 <sup>-20</sup> |
| <i>LY6K</i>     | -3.33802 | 2.952217 | 1.57x10 <sup>-21</sup> | 1.39x10 <sup>-20</sup> |
| <i>IGSF10</i>   | 2.524937 | 5.00745  | 1.94x10 <sup>-21</sup> | 1.70x10 <sup>-20</sup> |
| <i>CRLF1</i>    | -3.76973 | 5.702878 | 2.04x10 <sup>-21</sup> | 1.78x10 <sup>-20</sup> |
| <i>COL1A2</i>   | -2.09462 | 10.76784 | 2.46x10 <sup>-21</sup> | 2.14x10 <sup>-20</sup> |
| <i>SEMA3A</i>   | -2.72561 | 4.353348 | 2.62x10 <sup>-21</sup> | 2.27x10 <sup>-20</sup> |
| <i>AGR2</i>     | -2.47558 | 8.351463 | 2.70x10 <sup>-21</sup> | 2.34x10 <sup>-20</sup> |
| <i>SLC2A5</i>   | -2.80098 | 2.587861 | 3.47x10 <sup>-21</sup> | 2.97x10 <sup>-20</sup> |
| <i>IGFBP3</i>   | -2.17849 | 7.85845  | 4.02x10 <sup>-21</sup> | 3.43x10 <sup>-20</sup> |
| <i>SERPINB5</i> | -4.72025 | 3.318395 | 4.45x10 <sup>-21</sup> | 3.77x10 <sup>-20</sup> |
| <i>LRRC15</i>   | -2.95445 | 4.782877 | 4.82x10 <sup>-21</sup> | 4.08x10 <sup>-20</sup> |
| <i>ABCA3</i>    | 2.150956 | 9.39504  | 5.05x10 <sup>-21</sup> | 4.26x10 <sup>-20</sup> |
| <i>CSF3</i>     | 4.857813 | 5.239267 | 6.12x10 <sup>-21</sup> | 5.14x10 <sup>-20</sup> |
| <i>SUSD2</i>    | 2.388022 | 8.827694 | 6.40x10 <sup>-21</sup> | 5.36x10 <sup>-20</sup> |
| <i>TFPI2</i>    | -4.06853 | 6.454706 | 6.73x10 <sup>-21</sup> | 5.62x10 <sup>-20</sup> |
| <i>CILP</i>     | -2.96007 | 4.124913 | 7.87x10 <sup>-21</sup> | 6.54x10 <sup>-20</sup> |
| <i>DVWA</i>     | -4.2556  | -2.62158 | 9.37x10 <sup>-21</sup> | 7.75x10 <sup>-20</sup> |
| <i>SCN7A</i>    | 2.13838  | 5.031214 | 1.10x10 <sup>-20</sup> | 9.04x10 <sup>-20</sup> |
| <i>CLDN6</i>    | -5.42362 | 3.044198 | 1.18x10 <sup>-20</sup> | 9.74x10 <sup>-20</sup> |
| <i>DNASE1L3</i> | 3.11473  | 3.842186 | 1.83x10 <sup>-20</sup> | 1.48x10 <sup>-19</sup> |
| <i>ACOXL</i>    | 2.299982 | 2.893926 | 1.90x10 <sup>-20</sup> | 1.54x10 <sup>-19</sup> |
| <i>MUC20</i>    | -2.04217 | 5.698914 | 1.96x10 <sup>-20</sup> | 1.59x10 <sup>-19</sup> |
| <i>NPTX2</i>    | -3.91845 | 3.502478 | 2.15x10 <sup>-20</sup> | 1.73x10 <sup>-19</sup> |
| <i>PII6</i>     | 3.574093 | 2.841306 | 2.26x10 <sup>-20</sup> | 1.82x10 <sup>-19</sup> |
| <i>AKRIC2</i>   | -4.62428 | 7.748622 | 2.61x10 <sup>-20</sup> | 2.09x10 <sup>-19</sup> |
| <i>VSIG4</i>    | 2.055739 | 7.385769 | 2.84x10 <sup>-20</sup> | 2.26x10 <sup>-19</sup> |
| <i>CKMT1B</i>   | -2.72681 | 3.399383 | 3.01x10 <sup>-20</sup> | 2.39x10 <sup>-19</sup> |

|                  |          |          |                        |                        |
|------------------|----------|----------|------------------------|------------------------|
| <i>CXCR2</i>     | 2.125401 | 2.770004 | 4.08x10 <sup>-20</sup> | 3.21x10 <sup>-19</sup> |
| <i>NMNAT2</i>    | -2.72057 | 3.606454 | 5.04x10 <sup>-20</sup> | 3.93x10 <sup>-19</sup> |
| <i>TFF2</i>      | -13.8351 | 6.329752 | 5.82x10 <sup>-20</sup> | 4.52x10 <sup>-19</sup> |
| <i>DUOXA1</i>    | 2.161162 | 4.647651 | 6.67x10 <sup>-20</sup> | 5.17x10 <sup>-19</sup> |
| <i>BHMT2</i>     | -3.09911 | 3.171306 | 6.76x10 <sup>-20</sup> | 5.23x10 <sup>-19</sup> |
| <i>IVL</i>       | -4.66572 | 2.708245 | 7.15x10 <sup>-20</sup> | 5.52x10 <sup>-19</sup> |
| <i>CDA</i>       | -2.9602  | 3.785224 | 7.35x10 <sup>-20</sup> | 5.66x10 <sup>-19</sup> |
| <i>EMR1</i>      | 2.499037 | 3.124907 | 8.90x10 <sup>-20</sup> | 6.82x10 <sup>-19</sup> |
| <i>SLC6A3</i>    | -4.55271 | 2.697833 | 9.94x10 <sup>-20</sup> | 7.59x10 <sup>-19</sup> |
| <i>FCRL5</i>     | -2.74578 | 3.244501 | 9.97x10 <sup>-20</sup> | 7.61x10 <sup>-19</sup> |
| <i>DIO2</i>      | -2.66573 | 3.501783 | 1.32x10 <sup>-19</sup> | 9.95x10 <sup>-19</sup> |
| <i>SPINK4</i>    | -12.4556 | 3.72637  | 1.32x10 <sup>-19</sup> | 9.95x10 <sup>-19</sup> |
| <i>DARC</i>      | 2.247583 | 5.411365 | 1.35x10 <sup>-19</sup> | 1.02x10 <sup>-18</sup> |
| <i>LIPK</i>      | -5.52316 | -2.88717 | 1.43x10 <sup>-19</sup> | 1.08x10 <sup>-18</sup> |
| <i>SELE</i>      | 3.17465  | 3.707294 | 1.88x10 <sup>-19</sup> | 1.40x10 <sup>-18</sup> |
| <i>KRT16</i>     | -5.10334 | 2.935863 | 1.99x10 <sup>-19</sup> | 1.47x10 <sup>-18</sup> |
| <i>AHNAK2</i>    | -2.07546 | 6.352635 | 3.01x10 <sup>-19</sup> | 2.20x10 <sup>-18</sup> |
| <i>LOC96610</i>  | -2.68194 | 11.12164 | 3.11x10 <sup>-19</sup> | 2.27x10 <sup>-18</sup> |
| <i>COMP</i>      | -3.49068 | 5.102999 | 3.27x10 <sup>-19</sup> | 2.38x10 <sup>-18</sup> |
| <i>LRRK2</i>     | 2.274463 | 8.034696 | 3.84x10 <sup>-19</sup> | 2.78x10 <sup>-18</sup> |
| <i>LOC723809</i> | 2.652336 | 2.93528  | 6.46x10 <sup>-19</sup> | 4.60x10 <sup>-18</sup> |
| <i>PCDH7</i>     | -2.10478 | 4.589826 | 7.41x10 <sup>-19</sup> | 5.26x10 <sup>-18</sup> |
| <i>SI00A2</i>    | -2.93309 | 4.127744 | 8.25x10 <sup>-19</sup> | 5.84x10 <sup>-18</sup> |
| <i>MSMP</i>      | -3.88342 | 3.826585 | 8.72x10 <sup>-19</sup> | 6.17x10 <sup>-18</sup> |
| <i>F11</i>       | 3.283843 | 2.651947 | 1.14x10 <sup>-18</sup> | 7.98x10 <sup>-18</sup> |
| <i>TNNT1</i>     | -3.44455 | 3.512295 | 1.17x10 <sup>-18</sup> | 8.16x10 <sup>-18</sup> |
| <i>HBA1</i>      | 3.546867 | 7.167406 | 1.21x10 <sup>-18</sup> | 8.42x10 <sup>-18</sup> |
| <i>CXCL2</i>     | 2.656945 | 6.838542 | 1.47x10 <sup>-18</sup> | 1.02x10 <sup>-17</sup> |
| <i>BMPER</i>     | 2.305085 | 2.798302 | 1.50x10 <sup>-18</sup> | 1.04x10 <sup>-17</sup> |

|                  |          |          |                        |                        |
|------------------|----------|----------|------------------------|------------------------|
| <i>LOC645323</i> | -4.48561 | -2.76398 | 1.71x10 <sup>-18</sup> | 1.17x10 <sup>-17</sup> |
| <i>POSTN</i>     | -2.1676  | 7.885964 | 2.08x10 <sup>-18</sup> | 1.42x10 <sup>-17</sup> |
| <i>SLC16A9</i>   | -2.61923 | 3.435322 | 2.30x10 <sup>-18</sup> | 1.57x10 <sup>-17</sup> |
| <i>NPSRI</i>     | -5.50056 | -2.76469 | 2.65x10 <sup>-18</sup> | 1.79x10 <sup>-17</sup> |
| <i>GABRP</i>     | -4.3691  | 4.219656 | 3.30x10 <sup>-18</sup> | 2.22x10 <sup>-17</sup> |
| <i>FOSB</i>      | 3.255076 | 9.123579 | 3.50x10 <sup>-18</sup> | 2.34x10 <sup>-17</sup> |
| <i>MTNRI1A</i>   | -3.84109 | -2.73193 | 4.21x10 <sup>-18</sup> | 2.80x10 <sup>-17</sup> |
| <i>AGT</i>       | -2.66235 | 3.875499 | 7.11x10 <sup>-18</sup> | 4.64x10 <sup>-17</sup> |
| <i>PEBP4</i>     | 2.891779 | 5.923145 | 8.72x10 <sup>-18</sup> | 5.65x10 <sup>-17</sup> |
| <i>CALCA</i>     | -6.29861 | 4.252594 | 1.14x10 <sup>-17</sup> | 7.34x10 <sup>-17</sup> |
| <i>CCL14</i>     | 2.138081 | 5.209514 | 1.17x10 <sup>-17</sup> | 7.50x10 <sup>-17</sup> |
| <i>SFTPA1</i>    | 2.89069  | 12.94447 | 1.78x10 <sup>-17</sup> | 1.13x10 <sup>-16</sup> |
| <i>KCNE4</i>     | -2.39675 | 4.029175 | 1.89x10 <sup>-17</sup> | 1.19x10 <sup>-16</sup> |
| <i>SLC46A2</i>   | 2.258655 | 4.444582 | 2.58x10 <sup>-17</sup> | 1.61x10 <sup>-16</sup> |
| <i>UNC93A</i>    | -5.42947 | -2.70918 | 3.01x10 <sup>-17</sup> | 1.87x10 <sup>-16</sup> |
| <i>POF1B</i>     | -2.35297 | 3.621164 | 3.89x10 <sup>-17</sup> | 2.39x10 <sup>-16</sup> |
| <i>KLB</i>       | 2.458173 | 2.777213 | 4.20x10 <sup>-17</sup> | 2.58x10 <sup>-16</sup> |
| <i>MLLT11</i>    | -2.27229 | 3.235876 | 4.21x10 <sup>-17</sup> | 2.58x10 <sup>-16</sup> |
| <i>MTMR7</i>     | -3.23022 | 3.963509 | 5.22x10 <sup>-17</sup> | 3.18x10 <sup>-16</sup> |
| <i>CHGB</i>      | -3.96077 | 2.720361 | 5.73x10 <sup>-17</sup> | 3.47x10 <sup>-16</sup> |
| <i>MAGEA3</i>    | -8.12922 | 2.544954 | 6.79x10 <sup>-17</sup> | 4.09x10 <sup>-16</sup> |
| <i>SFTPD</i>     | 2.45247  | 9.225582 | 9.71x10 <sup>-17</sup> | 5.75x10 <sup>-16</sup> |
| <i>GPR110</i>    | -2.54432 | 5.292756 | 1.06x10 <sup>-16</sup> | 6.26x10 <sup>-16</sup> |
| <i>MUC5B</i>     | -4.32809 | 9.484624 | 1.52x10 <sup>-16</sup> | 8.85x10 <sup>-16</sup> |
| <i>KCNK3</i>     | 2.105479 | 4.957303 | 1.82x10 <sup>-16</sup> | 1.06x10 <sup>-15</sup> |
| <i>PCSK1N</i>    | -2.51313 | 2.924506 | 2.06x10 <sup>-16</sup> | 1.19x10 <sup>-15</sup> |
| <i>EPB42</i>     | 3.945226 | -2.66414 | 2.23x10 <sup>-16</sup> | 1.28x10 <sup>-15</sup> |
| <i>MMP9</i>      | -2.38961 | 6.18846  | 2.33x10 <sup>-16</sup> | 1.34x10 <sup>-15</sup> |
| <i>EFNA2</i>     | -5.12134 | -2.93473 | 2.44x10 <sup>-16</sup> | 1.40x10 <sup>-15</sup> |



|                 |          |          |                        |                        |
|-----------------|----------|----------|------------------------|------------------------|
| <i>KLK12</i>    | -5.973   | 3.640891 | 2.53x10 <sup>-16</sup> | 1.45x10 <sup>-15</sup> |
| <i>MAGEA6</i>   | -7.75338 | 2.928184 | 3.17x10 <sup>-16</sup> | 1.80x10 <sup>-15</sup> |
| <i>KRT6A</i>    | -4.71748 | 4.98037  | 3.84x10 <sup>-16</sup> | 2.16x10 <sup>-15</sup> |
| <i>ACTL8</i>    | -5.48295 | -2.60236 | 4.37x10 <sup>-16</sup> | 2.45x10 <sup>-15</sup> |
| <i>KIAA0408</i> | 2.873598 | 4.349209 | 4.88x10 <sup>-16</sup> | 2.73x10 <sup>-15</sup> |
| <i>SYT13</i>    | -3.90104 | 3.144807 | 5.09x10 <sup>-16</sup> | 2.84x10 <sup>-15</sup> |
| <i>TPPP3</i>    | 2.134711 | 7.058715 | 5.13x10 <sup>-16</sup> | 2.86x10 <sup>-15</sup> |
| <i>KRT15</i>    | -2.4332  | 4.915202 | 5.81x10 <sup>-16</sup> | 3.22x10 <sup>-15</sup> |
| <i>SFTPA2</i>   | 2.743477 | 13.91528 | 6.53x10 <sup>-16</sup> | 3.59x10 <sup>-15</sup> |
| <i>ENPP3</i>    | -2.79271 | 2.838002 | 6.63x10 <sup>-16</sup> | 3.65x10 <sup>-15</sup> |
| <i>F5</i>       | -2.62646 | 3.931091 | 8.84x10 <sup>-16</sup> | 4.80x10 <sup>-15</sup> |
| <i>ACRV1</i>    | -3.61744 | -3.02206 | 9.30x10 <sup>-16</sup> | 5.04x10 <sup>-15</sup> |
| <i>PLAC2</i>    | 2.078602 | 2.938388 | 9.42x10 <sup>-16</sup> | 5.10x10 <sup>-15</sup> |
| <i>RET</i>      | -2.88783 | 2.617731 | 1.17x10 <sup>-15</sup> | 6.29x10 <sup>-15</sup> |
| <i>NPTX1</i>    | -2.99902 | 3.554855 | 1.17x10 <sup>-15</sup> | 6.31x10 <sup>-15</sup> |
| <i>CYP4B1</i>   | 2.671511 | 8.439387 | 1.32x10 <sup>-15</sup> | 7.07x10 <sup>-15</sup> |
| <i>H19</i>      | -3.7689  | 8.748388 | 1.64x10 <sup>-15</sup> | 8.69x10 <sup>-15</sup> |
| <i>AKRIC1</i>   | -3.20739 | 7.824957 | 1.84x10 <sup>-15</sup> | 9.75x10 <sup>-15</sup> |
| <i>SOSTDC1</i>  | 3.222453 | 4.371298 | 2.00x10 <sup>-15</sup> | 1.06x10 <sup>-14</sup> |
| <i>IL6</i>      | 2.546031 | 5.206587 | 2.27x10 <sup>-15</sup> | 1.19x10 <sup>-14</sup> |
| <i>ANXA8L2</i>  | 2.457604 | 4.427918 | 2.29x10 <sup>-15</sup> | 1.20x10 <sup>-14</sup> |
| <i>NKX1-2</i>   | -4.88464 | -3.02504 | 3.28x10 <sup>-15</sup> | 1.70x10 <sup>-14</sup> |
| <i>VGLL2</i>    | -9.80826 | 2.850396 | 3.53x10 <sup>-15</sup> | 1.82x10 <sup>-14</sup> |
| <i>MGC29506</i> | -2.24045 | 4.975631 | 4.50x10 <sup>-15</sup> | 2.30x10 <sup>-14</sup> |
| <i>NXPH1</i>    | -4.22225 | -2.62374 | 5.12x10 <sup>-15</sup> | 2.60x10 <sup>-14</sup> |
| <i>ESPN</i>     | -2.15076 | 2.828581 | 6.11x10 <sup>-15</sup> | 3.08x10 <sup>-14</sup> |
| <i>C2orf40</i>  | 2.41446  | 3.037655 | 6.22x10 <sup>-15</sup> | 3.14x10 <sup>-14</sup> |
| <i>ASCL1</i>    | -5.35388 | 4.567434 | 6.30x10 <sup>-15</sup> | 3.18x10 <sup>-14</sup> |
| <i>ZBTB16</i>   | 2.400773 | 3.752431 | 7.50x10 <sup>-15</sup> | 3.76x10 <sup>-14</sup> |

|                  |          |          |                        |                        |
|------------------|----------|----------|------------------------|------------------------|
| <i>PRG4</i>      | 2.725761 | 5.392557 | 8.39x10 <sup>-15</sup> | 4.19x10 <sup>-14</sup> |
| <i>PAX7</i>      | -7.33032 | 3.431329 | 1.10x10 <sup>-14</sup> | 5.44x10 <sup>-14</sup> |
| <i>FER1L6</i>    | -5.3088  | 2.810238 | 1.12x10 <sup>-14</sup> | 5.55x10 <sup>-14</sup> |
| <i>WNK2</i>      | -2.21647 | 2.975385 | 1.15x10 <sup>-14</sup> | 5.65x10 <sup>-14</sup> |
| <i>TNFRSF6B</i>  | -2.40486 | 3.485817 | 1.32x10 <sup>-14</sup> | 6.48x10 <sup>-14</sup> |
| <i>RNASE10</i>   | -3.76924 | -2.70106 | 1.39x10 <sup>-14</sup> | 6.79x10 <sup>-14</sup> |
| <i>KRT6B</i>     | -4.25424 | 2.563671 | 1.48x10 <sup>-14</sup> | 7.23x10 <sup>-14</sup> |
| <i>CA3</i>       | 2.116953 | 2.94804  | 1.56x10 <sup>-14</sup> | 7.60x10 <sup>-14</sup> |
| <i>MTIM</i>      | 2.485889 | 3.803715 | 1.57x10 <sup>-14</sup> | 7.62x10 <sup>-14</sup> |
| <i>KRT17</i>     | -2.71174 | 6.259353 | 1.88x10 <sup>-14</sup> | 9.07x10 <sup>-14</sup> |
| <i>ADAM6</i>     | -2.21146 | 12.18012 | 1.94x10 <sup>-14</sup> | 9.37x10 <sup>-14</sup> |
| <i>BCAS1</i>     | -2.85506 | 4.747956 | 2.39x10 <sup>-14</sup> | 1.14x10 <sup>-13</sup> |
| <i>CDH2</i>      | -2.50676 | 2.632566 | 3.10x10 <sup>-14</sup> | 1.47x10 <sup>-13</sup> |
| <i>LCN2</i>      | -2.47999 | 6.697981 | 3.48x10 <sup>-14</sup> | 1.64x10 <sup>-13</sup> |
| <i>CACNA2D2</i>  | 2.291589 | 7.583587 | 3.95x10 <sup>-14</sup> | 1.85x10 <sup>-13</sup> |
| <i>VTCN1</i>     | -2.99722 | 2.880016 | 4.12x10 <sup>-14</sup> | 1.93x10 <sup>-13</sup> |
| <i>FSTL4</i>     | -2.50603 | 3.224558 | 4.54x10 <sup>-14</sup> | 2.11x10 <sup>-13</sup> |
| <i>TF</i>        | -3.53298 | 3.361313 | 5.63x10 <sup>-14</sup> | 2.60x10 <sup>-13</sup> |
| <i>SLC4A11</i>   | -2.1211  | 2.917705 | 6.31x10 <sup>-14</sup> | 2.89x10 <sup>-13</sup> |
| <i>TMPRSS6</i>   | -2.82298 | 3.140688 | 6.52x10 <sup>-14</sup> | 2.99x10 <sup>-13</sup> |
| <i>C3orf30</i>   | -3.73811 | -2.78826 | 7.41x10 <sup>-14</sup> | 3.38x10 <sup>-13</sup> |
| <i>POU2AF1</i>   | -2.12845 | 4.447465 | 8.31x10 <sup>-14</sup> | 3.78x10 <sup>-13</sup> |
| <i>LOC284798</i> | -3.06869 | -2.69784 | 9.29x10 <sup>-14</sup> | 4.20x10 <sup>-13</sup> |
| <i>MAGEA4</i>    | -8.55671 | 2.570619 | 1.02x10 <sup>-13</sup> | 4.60x10 <sup>-13</sup> |
| <i>SIX1</i>      | -2.11673 | 3.829164 | 1.21x10 <sup>-13</sup> | 5.40x10 <sup>-13</sup> |
| <i>FGA</i>       | -4.20616 | 8.117412 | 1.42x10 <sup>-13</sup> | 6.33x10 <sup>-13</sup> |
| <i>SYTI</i>      | -2.43782 | 3.243821 | 1.62x10 <sup>-13</sup> | 7.16x10 <sup>-13</sup> |
| <i>ADAMDEC1</i>  | -2.71027 | 3.194334 | 1.72x10 <sup>-13</sup> | 7.61x10 <sup>-13</sup> |
| <i>CBRI</i>      | -2.00144 | 7.374028 | 1.82x10 <sup>-13</sup> | 8.03x10 <sup>-13</sup> |

|                     |          |          |                        |                        |
|---------------------|----------|----------|------------------------|------------------------|
| <i>FPR2</i>         | 2.183262 | 3.953209 | 1.99x10 <sup>-13</sup> | 8.74x10 <sup>-13</sup> |
| <i>ACHE</i>         | -2.01692 | 3.038469 | 2.19x10 <sup>-13</sup> | 9.62x10 <sup>-13</sup> |
| <i>NEFH</i>         | -2.83313 | 2.659895 | 2.29x10 <sup>-13</sup> | 1.00x10 <sup>-12</sup> |
| <i>MMP7</i>         | -2.22586 | 6.275193 | 2.79x10 <sup>-13</sup> | 1.21x10 <sup>-12</sup> |
| <i>SLCIA7</i>       | -2.77259 | 3.777109 | 2.90x10 <sup>-13</sup> | 1.25x10 <sup>-12</sup> |
| <i>TSPAN8</i>       | -2.60888 | 6.316883 | 3.31x10 <sup>-13</sup> | 1.43x10 <sup>-12</sup> |
| <i>HIST1H1B</i>     | -3.07997 | -2.90462 | 3.36x10 <sup>-13</sup> | 1.44x10 <sup>-12</sup> |
| <i>MS4A15</i>       | 2.756929 | 5.662822 | 3.42x10 <sup>-13</sup> | 1.47x10 <sup>-12</sup> |
| <i>MUC4</i>         | -2.20329 | 6.452722 | 3.91x10 <sup>-13</sup> | 1.67x10 <sup>-12</sup> |
| <i>EYA2</i>         | -2.36802 | 3.739202 | 4.98x10 <sup>-13</sup> | 2.11x10 <sup>-12</sup> |
| <i>ERN2</i>         | -3.27169 | 3.81664  | 5.16x10 <sup>-13</sup> | 2.18x10 <sup>-12</sup> |
| <i>AVPR1B</i>       | -3.40704 | -3.21512 | 5.22x10 <sup>-13</sup> | 2.21x10 <sup>-12</sup> |
| <i>CLDN18</i>       | 3.0288   | 9.363938 | 6.02x10 <sup>-13</sup> | 2.53x10 <sup>-12</sup> |
| <i>ST6GALNAC1</i>   | -2.02582 | 5.521251 | 7.55x10 <sup>-13</sup> | 3.14x10 <sup>-12</sup> |
| <i>SOHLH1</i>       | -5.14149 | -2.70592 | 1.47x10 <sup>-12</sup> | 5.99x10 <sup>-12</sup> |
| <i>VSIG1</i>        | -3.39367 | 5.031752 | 2.08x10 <sup>-12</sup> | 8.36x10 <sup>-12</sup> |
| <i>LECT1</i>        | -5.81253 | 4.031348 | 2.11x10 <sup>-12</sup> | 8.47x10 <sup>-12</sup> |
| <i>FOXL2</i>        | -4.1289  | -2.51121 | 2.28x10 <sup>-12</sup> | 9.12x10 <sup>-12</sup> |
| <i>C3orf72</i>      | -4.22208 | -3.06166 | 2.40x10 <sup>-12</sup> | 9.60x10 <sup>-12</sup> |
| <i>UGT1A6</i>       | -3.55584 | 3.697141 | 3.11x10 <sup>-12</sup> | 1.23x10 <sup>-11</sup> |
| <i>CXCL3</i>        | 2.07874  | 3.687326 | 7.04x10 <sup>-12</sup> | 2.71x10 <sup>-11</sup> |
| <i>DKK1</i>         | -2.64581 | 3.629539 | 1.10x10 <sup>-11</sup> | 4.13x10 <sup>-11</sup> |
| <i>LOC100132354</i> | -2.98094 | -3.09509 | 1.32x10 <sup>-11</sup> | 4.95x10 <sup>-11</sup> |
| <i>SMEK3P</i>       | -5.68125 | -2.73647 | 1.48x10 <sup>-11</sup> | 5.50x10 <sup>-11</sup> |
| <i>FRG2B</i>        | -4.93938 | -3.0259  | 1.71x10 <sup>-11</sup> | 6.36x10 <sup>-11</sup> |
| <i>F2</i>           | -4.93169 | -2.6112  | 1.83x10 <sup>-11</sup> | 6.78x10 <sup>-11</sup> |
| <i>FOXE3</i>        | -3.48755 | -2.71814 | 2.14x10 <sup>-11</sup> | 7.89x10 <sup>-11</sup> |
| <i>GABRA5</i>       | -4.62365 | -2.75036 | 2.16x10 <sup>-11</sup> | 7.96x10 <sup>-11</sup> |
| <i>LOC153910</i>    | -3.81657 | -3.05233 | 2.18x10 <sup>-11</sup> | 8.03x10 <sup>-11</sup> |

|                  |          |          |                        |                        |
|------------------|----------|----------|------------------------|------------------------|
| <i>PKP1</i>      | -2.2644  | 4.602236 | 2.37x10 <sup>-11</sup> | 8.70x10 <sup>-11</sup> |
| <i>PLUNC</i>     | -4.5575  | 7.41481  | 2.41x10 <sup>-11</sup> | 8.84x10 <sup>-11</sup> |
| <i>C17orf93</i>  | -4.94973 | -2.60461 | 3.49x10 <sup>-11</sup> | 1.27x10 <sup>-10</sup> |
| <i>CA7</i>       | -3.35828 | -2.93653 | 4.32x10 <sup>-11</sup> | 1.56x10 <sup>-10</sup> |
| <i>NKX6-1</i>    | -2.83326 | -2.76782 | 4.55x10 <sup>-11</sup> | 1.63x10 <sup>-10</sup> |
| <i>C4orf26</i>   | -3.367   | -2.73635 | 4.59x10 <sup>-11</sup> | 1.65x10 <sup>-10</sup> |
| <i>CRYBA2</i>    | -3.60293 | -3.31467 | 4.65x10 <sup>-11</sup> | 1.67x10 <sup>-10</sup> |
| <i>DLX2</i>      | -3.9946  | -2.54487 | 4.66x10 <sup>-11</sup> | 1.67x10 <sup>-10</sup> |
| <i>DPCR1</i>     | -3.51849 | 6.511975 | 5.60x10 <sup>-11</sup> | 1.99x10 <sup>-10</sup> |
| <i>ONECUT3</i>   | -5.72572 | -2.87314 | 5.78x10 <sup>-11</sup> | 2.05x10 <sup>-10</sup> |
| <i>CNTNAP4</i>   | -4.0932  | -2.58088 | 6.88x10 <sup>-11</sup> | 2.43x10 <sup>-10</sup> |
| <i>CYP4F11</i>   | -3.08603 | 2.86593  | 6.89x10 <sup>-11</sup> | 2.43x10 <sup>-10</sup> |
| <i>KRT23</i>     | -3.19416 | 2.755638 | 7.23x10 <sup>-11</sup> | 2.54x10 <sup>-10</sup> |
| <i>TGIF2LX</i>   | -4.70303 | -3.28819 | 1.03x10 <sup>-10</sup> | 3.60x10 <sup>-10</sup> |
| <i>MAGEA11</i>   | -4.75473 | -3.21551 | 1.33x10 <sup>-10</sup> | 4.59x10 <sup>-10</sup> |
| <i>FOXR2</i>     | -5.80692 | -2.74744 | 1.57x10 <sup>-10</sup> | 5.38x10 <sup>-10</sup> |
| <i>NKX2-5</i>    | -4.27373 | -2.59442 | 1.63x10 <sup>-10</sup> | 5.58x10 <sup>-10</sup> |
| <i>ZNF280A</i>   | -4.19032 | -2.99772 | 2.08x10 <sup>-10</sup> | 7.05x10 <sup>-10</sup> |
| <i>EIF4E1B</i>   | -5.29602 | -2.55981 | 2.21x10 <sup>-10</sup> | 7.48x10 <sup>-10</sup> |
| <i>C14orf162</i> | -3.51282 | -2.75171 | 2.58x10 <sup>-10</sup> | 8.66x10 <sup>-10</sup> |
| <i>WIF1</i>      | 2.384607 | 6.681616 | 2.87x10 <sup>-10</sup> | 9.60x10 <sup>-10</sup> |
| <i>OR56A3</i>    | -5.01667 | -2.95673 | 3.22x10 <sup>-10</sup> | 1.07x10 <sup>-9</sup>  |
| <i>ZNF679</i>    | -5.10402 | -3.1298  | 3.37x10 <sup>-10</sup> | 1.12x10 <sup>-9</sup>  |
| <i>LGALS4</i>    | -3.09817 | 4.016309 | 3.50x10 <sup>-10</sup> | 1.16x10 <sup>-9</sup>  |
| <i>NKX2-4</i>    | -4.64831 | -3.37127 | 3.57x10 <sup>-10</sup> | 1.18x10 <sup>-9</sup>  |
| <i>LOC285696</i> | -2.46631 | -2.78239 | 3.69x10 <sup>-10</sup> | 1.22x10 <sup>-9</sup>  |
| <i>ADAMTS20</i>  | -4.1153  | -2.89211 | 3.72x10 <sup>-10</sup> | 1.23x10 <sup>-9</sup>  |
| <i>SCG2</i>      | -2.4162  | 3.118716 | 4.83x10 <sup>-10</sup> | 1.58x10 <sup>-9</sup>  |
| <i>PHOX2B</i>    | -4.96869 | -3.10574 | 5.19x10 <sup>-10</sup> | 1.69x10 <sup>-9</sup>  |

|                  |          |          |                        |                       |
|------------------|----------|----------|------------------------|-----------------------|
| <i>EDN2</i>      | -2.46298 | 2.604285 | 5.20x10 <sup>-10</sup> | 1.70x10 <sup>-9</sup> |
| <i>WDR72</i>     | -2.50228 | 2.869341 | 5.36x10 <sup>-10</sup> | 1.75x10 <sup>-9</sup> |
| <i>DUOX2</i>     | -2.75545 | 4.963473 | 5.78x10 <sup>-10</sup> | 1.88x10 <sup>-9</sup> |
| <i>MUC16</i>     | -2.88255 | 4.996767 | 7.45x10 <sup>-10</sup> | 2.40x10 <sup>-9</sup> |
| <i>SSX4</i>      | -4.25464 | -3.35442 | 9.11x10 <sup>-10</sup> | 2.92x10 <sup>-9</sup> |
| <i>MAGEB1</i>    | -4.56536 | -3.31165 | 1.01x10 <sup>-9</sup>  | 3.23x10 <sup>-9</sup> |
| <i>HOXC12</i>    | -4.78521 | -3.12035 | 1.11x10 <sup>-9</sup>  | 3.51x10 <sup>-9</sup> |
| <i>PRDM9</i>     | -4.48988 | -3.38007 | 1.15x10 <sup>-9</sup>  | 3.62x10 <sup>-9</sup> |
| <i>EREG</i>      | -2.54274 | 4.394341 | 1.38x10 <sup>-9</sup>  | 4.33x10 <sup>-9</sup> |
| <i>FAM169B</i>   | -4.29031 | -2.8705  | 1.39x10 <sup>-9</sup>  | 4.38x10 <sup>-9</sup> |
| <i>KCNU1</i>     | -4.3332  | -3.15012 | 1.46x10 <sup>-9</sup>  | 4.57x10 <sup>-9</sup> |
| <i>CCDC17</i>    | 2.220291 | 3.033616 | 1.95x10 <sup>-9</sup>  | 6.04x10 <sup>-9</sup> |
| <i>SCGB1A1</i>   | 2.983981 | 9.627928 | 1.96x10 <sup>-9</sup>  | 6.08x10 <sup>-9</sup> |
| <i>DDX53</i>     | -4.83808 | -2.90301 | 2.28x10 <sup>-9</sup>  | 7.01x10 <sup>-9</sup> |
| <i>IL1RL1</i>    | 2.341061 | 4.780418 | 2.75x10 <sup>-9</sup>  | 8.41x10 <sup>-9</sup> |
| <i>TFF3</i>      | -2.02678 | 5.458719 | 3.07x10 <sup>-9</sup>  | 9.33x10 <sup>-9</sup> |
| <i>IGFL3</i>     | -4.02291 | -3.22428 | 3.13x10 <sup>-9</sup>  | 9.50x10 <sup>-9</sup> |
| <i>ALOX15</i>    | 2.447457 | 4.287162 | 3.15x10 <sup>-9</sup>  | 9.55x10 <sup>-9</sup> |
| <i>NR5A1</i>     | -2.63884 | -2.97107 | 3.67x10 <sup>-9</sup>  | 1.11x10 <sup>-8</sup> |
| <i>FZD10</i>     | -2.16846 | 2.544836 | 3.83x10 <sup>-9</sup>  | 1.16x10 <sup>-8</sup> |
| <i>TSPY2</i>     | -5.69509 | -2.65374 | 3.85x10 <sup>-9</sup>  | 1.16x10 <sup>-8</sup> |
| <i>PLA2G2A</i>   | 2.375018 | 3.422367 | 4.65x10 <sup>-9</sup>  | 1.39x10 <sup>-8</sup> |
| <i>C10orf71</i>  | -3.57707 | -2.50103 | 4.88x10 <sup>-9</sup>  | 1.45x10 <sup>-8</sup> |
| <i>BAGE</i>      | -4.46595 | -3.14818 | 5.07x10 <sup>-9</sup>  | 1.51x10 <sup>-8</sup> |
| <i>FRG2</i>      | -4.39758 | -3.4865  | 9.48x10 <sup>-9</sup>  | 2.76x10 <sup>-8</sup> |
| <i>LOC441177</i> | -3.78912 | -2.66427 | 9.80x10 <sup>-9</sup>  | 2.85x10 <sup>-8</sup> |
| <i>C7orf52</i>   | -2.87774 | -2.90156 | 1.03x10 <sup>-8</sup>  | 2.97x10 <sup>-8</sup> |
| <i>GIP</i>       | -4.33585 | -3.31031 | 1.21x10 <sup>-8</sup>  | 3.48x10 <sup>-8</sup> |
| <i>CNDP1</i>     | -2.77868 | -2.83837 | 1.35x10 <sup>-8</sup>  | 3.86x10 <sup>-8</sup> |

|                 |          |          |                       |                       |
|-----------------|----------|----------|-----------------------|-----------------------|
| <i>AGTR2</i>    | 2.346076 | 4.682896 | 1.54x10 <sup>-8</sup> | 4.40x10 <sup>-8</sup> |
| <i>CGB8</i>     | -4.25672 | -3.1442  | 1.86x10 <sup>-8</sup> | 5.28x10 <sup>-8</sup> |
| <i>TRIM72</i>   | -2.85852 | -2.96663 | 2.04x10 <sup>-8</sup> | 5.75x10 <sup>-8</sup> |
| <i>MUC7</i>     | -4.70714 | -3.30145 | 2.12x10 <sup>-8</sup> | 5.98x10 <sup>-8</sup> |
| <i>GAGE8</i>    | -4.43385 | -3.34108 | 2.13x10 <sup>-8</sup> | 5.99x10 <sup>-8</sup> |
| <i>TSPY1</i>    | -4.47439 | -3.44712 | 2.38x10 <sup>-8</sup> | 6.68x10 <sup>-8</sup> |
| <i>RAET1L</i>   | -3.08365 | -2.85944 | 2.47x10 <sup>-8</sup> | 6.92x10 <sup>-8</sup> |
| <i>C14orf23</i> | -4.1184  | -3.56119 | 2.64x10 <sup>-8</sup> | 7.38x10 <sup>-8</sup> |
| <i>ATOH7</i>    | -2.09901 | -2.79827 | 2.71x10 <sup>-8</sup> | 7.57x10 <sup>-8</sup> |
| <i>RFPL4B</i>   | -3.19213 | -3.2644  | 2.71x10 <sup>-8</sup> | 7.58x10 <sup>-8</sup> |
| <i>MRGPRX3</i>  | -3.6739  | -2.71813 | 2.77x10 <sup>-8</sup> | 7.74x10 <sup>-8</sup> |
| <i>MAGEC3</i>   | -3.02789 | -2.92401 | 2.88x10 <sup>-8</sup> | 8.02x10 <sup>-8</sup> |
| <i>VCX</i>      | -3.48432 | -2.96863 | 3.01x10 <sup>-8</sup> | 8.35x10 <sup>-8</sup> |
| <i>APOA4</i>    | -4.5523  | -2.6771  | 4.01x10 <sup>-8</sup> | 1.10x10 <sup>-7</sup> |
| <i>SOX3</i>     | -3.54363 | -3.11257 | 4.08x10 <sup>-8</sup> | 1.12x10 <sup>-7</sup> |
| <i>KCNC2</i>    | -3.73993 | -2.90993 | 4.38x10 <sup>-8</sup> | 1.20x10 <sup>-7</sup> |
| <i>CLDN2</i>    | -2.22978 | 4.347403 | 5.27x10 <sup>-8</sup> | 1.43x10 <sup>-7</sup> |
| <i>SNTN</i>     | 2.206235 | 4.206678 | 6.32x10 <sup>-8</sup> | 1.69x10 <sup>-7</sup> |
| <i>SAAI</i>     | -2.03641 | 3.448041 | 6.37x10 <sup>-8</sup> | 1.71x10 <sup>-7</sup> |
| <i>GUCY2E</i>   | -3.5004  | -3.48055 | 1.10x10 <sup>-7</sup> | 2.89x10 <sup>-7</sup> |
| <i>FAM92B</i>   | 2.052142 | 2.776099 | 1.30x10 <sup>-7</sup> | 3.40x10 <sup>-7</sup> |
| <i>SAGE1</i>    | -3.83536 | -2.50197 | 1.34x10 <sup>-7</sup> | 3.49x10 <sup>-7</sup> |
| <i>PNLIPRP3</i> | -3.28429 | -2.99507 | 1.37x10 <sup>-7</sup> | 3.58x10 <sup>-7</sup> |
| <i>CAMKV</i>    | -2.44727 | -2.95868 | 1.62x10 <sup>-7</sup> | 4.19x10 <sup>-7</sup> |
| <i>II-Mar</i>   | -4.46901 | -2.6713  | 1.76x10 <sup>-7</sup> | 4.53x10 <sup>-7</sup> |
| <i>SLC38A8</i>  | -3.07889 | -3.04363 | 1.84x10 <sup>-7</sup> | 4.72x10 <sup>-7</sup> |
| <i>CPLX2</i>    | -3.37933 | 3.325683 | 1.93x10 <sup>-7</sup> | 4.94x10 <sup>-7</sup> |
| <i>C11orf88</i> | 2.266068 | 3.032305 | 2.24x10 <sup>-7</sup> | 5.70x10 <sup>-7</sup> |
| <i>GABRQ</i>    | -2.7649  | -3.29671 | 2.41x10 <sup>-7</sup> | 6.13x10 <sup>-7</sup> |

|                     |          |          |                       |                       |
|---------------------|----------|----------|-----------------------|-----------------------|
| <i>RTL1</i>         | -3.15234 | -3.2462  | 2.80x10 <sup>-7</sup> | 7.05x10 <sup>-7</sup> |
| <i>PABPC1L2A</i>    | -3.63979 | -3.52933 | 2.81x10 <sup>-7</sup> | 7.08x10 <sup>-7</sup> |
| <i>LOC283404</i>    | -2.11164 | -2.62784 | 2.94x10 <sup>-7</sup> | 7.38x10 <sup>-7</sup> |
| <i>PCSK2</i>        | -2.93914 | 5.506044 | 3.66x10 <sup>-7</sup> | 9.11x10 <sup>-7</sup> |
| <i>GKN2</i>         | 2.178714 | 5.130381 | 4.01x10 <sup>-7</sup> | 9.93x10 <sup>-7</sup> |
| <i>RFX6</i>         | -3.14157 | -2.55818 | 4.55x10 <sup>-7</sup> | 1.12x10 <sup>-6</sup> |
| <i>SCGB1D2</i>      | -4.05066 | -2.57885 | 5.01x10 <sup>-7</sup> | 1.23x10 <sup>-6</sup> |
| <i>LRFN2</i>        | -2.09023 | -2.50613 | 6.73x10 <sup>-7</sup> | 1.63x10 <sup>-6</sup> |
| <i>GDPD2</i>        | -2.16059 | -3.0598  | 8.48x10 <sup>-7</sup> | 2.03x10 <sup>-6</sup> |
| <i>NTS</i>          | -2.88066 | 3.470425 | 9.06x10 <sup>-7</sup> | 2.16x10 <sup>-6</sup> |
| <i>LIN28A</i>       | -3.78646 | -2.94582 | 1.20x10 <sup>-6</sup> | 2.83x10 <sup>-6</sup> |
| <i>UPK1B</i>        | -3.35716 | 3.151581 | 1.24x10 <sup>-6</sup> | 2.92x10 <sup>-6</sup> |
| <i>ALDH3A1</i>      | -2.227   | 6.086463 | 1.86x10 <sup>-6</sup> | 4.31x10 <sup>-6</sup> |
| <i>LOC116437</i>    | -2.93199 | -3.23073 | 2.55x10 <sup>-6</sup> | 5.82x10 <sup>-6</sup> |
| <i>GLYATL1</i>      | -2.05099 | -2.65658 | 3.78x10 <sup>-6</sup> | 8.47x10 <sup>-6</sup> |
| <i>GKNI</i>         | -3.44651 | -3.12948 | 4.12x10 <sup>-6</sup> | 9.22x10 <sup>-6</sup> |
| <i>TMEM190</i>      | 2.237447 | 2.926926 | 5.70x10 <sup>-6</sup> | 1.25x10 <sup>-5</sup> |
| <i>UBE2U</i>        | -2.94304 | -3.4203  | 5.76x10 <sup>-6</sup> | 1.27x10 <sup>-5</sup> |
| <i>KC6</i>          | -2.45654 | -2.51515 | 7.02x10 <sup>-6</sup> | 1.53x10 <sup>-5</sup> |
| <i>TEX19</i>        | -2.21901 | -2.70716 | 8.97x10 <sup>-6</sup> | 1.94x10 <sup>-5</sup> |
| <i>C1orf194</i>     | 2.003703 | 2.786501 | 1.12x10 <sup>-5</sup> | 2.39x10 <sup>-5</sup> |
| <i>NOTO</i>         | -2.30984 | -3.01377 | 1.48x10 <sup>-5</sup> | 3.13x10 <sup>-5</sup> |
| <i>GAGE2A</i>       | -3.86778 | -2.86907 | 1.50x10 <sup>-5</sup> | 3.16x10 <sup>-5</sup> |
| <i>GOLGA8C</i>      | -2.15592 | -2.79064 | 1.52x10 <sup>-5</sup> | 3.20x10 <sup>-5</sup> |
| <i>KLK9</i>         | -3.31208 | -3.28929 | 1.76x10 <sup>-5</sup> | 3.68x10 <sup>-5</sup> |
| <i>NDST4</i>        | -2.82371 | -3.12208 | 1.81x10 <sup>-5</sup> | 3.78x10 <sup>-5</sup> |
| <i>CLEC3A</i>       | -2.93245 | -3.24534 | 2.43x10 <sup>-5</sup> | 5.00x10 <sup>-5</sup> |
| <i>LOC100130386</i> | -2.229   | -2.99049 | 4.70x10 <sup>-5</sup> | 9.36x10 <sup>-5</sup> |
| <i>MDGA2</i>        | -2.05826 | -2.84194 | 5.75x10 <sup>-5</sup> | 1.13x10 <sup>-4</sup> |

|                 |          |          |                       |                       |
|-----------------|----------|----------|-----------------------|-----------------------|
| <i>RBMY1A1</i>  | -3.47385 | -3.20023 | 7.26x10 <sup>-5</sup> | 1.41x10 <sup>-4</sup> |
| <i>GATSL2</i>   | -2.22213 | -2.74544 | 9.19x10 <sup>-5</sup> | 1.76x10 <sup>-4</sup> |
| <i>SMR3B</i>    | -2.90781 | -3.33852 | 1.80x10 <sup>-4</sup> | 3.34x10 <sup>-4</sup> |
| <i>SERPINB3</i> | -2.18885 | 3.403289 | 2.41x10 <sup>-4</sup> | 4.41x10 <sup>-4</sup> |
| <i>CLCA1</i>    | -2.7263  | -2.67091 | 2.57x10 <sup>-4</sup> | 4.68x10 <sup>-4</sup> |
| <i>KCNH5</i>    | -2.15406 | -2.61267 | 3.48x10 <sup>-4</sup> | 6.26x10 <sup>-4</sup> |
| <i>ST8SIA3</i>  | 2.047743 | -2.85298 | 4.65x10 <sup>-4</sup> | 8.23x10 <sup>-4</sup> |
| <i>KLK5</i>     | -2.29931 | 3.358024 | 4.69x10 <sup>-4</sup> | 8.31x10 <sup>-4</sup> |
| <i>UGT1A1</i>   | -2.16751 | -2.84093 | 6.17x10 <sup>-4</sup> | 1.08x10 <sup>-3</sup> |

---

logFC, log<sub>2</sub> fold-change; logCPM, log<sub>2</sub> counts-per-million; FDR, false discovery rate.



Table SII. Lung squamous cell carcinoma-specific differential gene expression analysis.

| Gene             | logFC    | logCPM   | P-value                 | FDR                     |
|------------------|----------|----------|-------------------------|-------------------------|
| <i>C15orf42</i>  | -4.60275 | 3.284947 | 1.03x10 <sup>-124</sup> | 1.79x10 <sup>-120</sup> |
| <i>KIF23</i>     | -3.94036 | 4.555619 | 2.55x10 <sup>-124</sup> | 2.21x10 <sup>-120</sup> |
| <i>PRC1</i>      | -3.75778 | 5.609334 | 4.64x10 <sup>-124</sup> | 2.46x10 <sup>-120</sup> |
| <i>SLC2A1</i>    | -5.65474 | 9.02631  | 5.68x10 <sup>-124</sup> | 2.46x10 <sup>-120</sup> |
| <i>CDCA5</i>     | -4.14869 | 4.813192 | 1.10x10 <sup>-118</sup> | 3.80x10 <sup>-115</sup> |
| <i>MCM2</i>      | -3.54866 | 6.593756 | 4.92x10 <sup>-112</sup> | 1.42x10 <sup>-108</sup> |
| <i>MCM4</i>      | -3.12027 | 6.340532 | 1.12x10 <sup>-111</sup> | 2.78x10 <sup>-108</sup> |
| <i>NCAPH</i>     | -4.32414 | 4.218568 | 3.32x10 <sup>-111</sup> | 7.18x10 <sup>-108</sup> |
| <i>C17orf53</i>  | -3.76639 | 2.752899 | 7.42x10 <sup>-111</sup> | 1.43x10 <sup>-107</sup> |
| <i>E2F7</i>      | -4.82279 | 3.295729 | 1.85x10 <sup>-110</sup> | 3.20x10 <sup>-107</sup> |
| <i>TFAP2A</i>    | -5.67091 | 4.819092 | 5.21x10 <sup>-107</sup> | 7.52x10 <sup>-104</sup> |
| <i>ARHGAP11A</i> | -3.26072 | 4.4321   | 2.59x10 <sup>-105</sup> | 3.45x10 <sup>-102</sup> |
| <i>ECT2</i>      | -3.3942  | 6.096616 | 4.26x10 <sup>-105</sup> | 5.27x10 <sup>-102</sup> |
| <i>FAM83B</i>    | -6.87862 | 4.012544 | 2.49x10 <sup>-104</sup> | 2.88x10 <sup>-101</sup> |
| <i>CCNBI</i>     | -3.64705 | 5.224799 | 1.26x10 <sup>-103</sup> | 1.36x10 <sup>-100</sup> |
| <i>KIAA1524</i>  | -3.27665 | 3.66761  | 2.46x10 <sup>-103</sup> | 2.51x10 <sup>-100</sup> |
| <i>RACGAP1</i>   | -2.47393 | 5.339181 | 5.77x10 <sup>-103</sup> | 5.55x10 <sup>-100</sup> |
| <i>KIF11</i>     | -3.83186 | 4.943246 | 7.82x10 <sup>-103</sup> | 7.13x10 <sup>-100</sup> |
| <i>FANCI</i>     | -3.18772 | 5.468008 | 5.95x10 <sup>-102</sup> | 5.15x10 <sup>-99</sup>  |
| <i>EXO1</i>      | -4.74179 | 3.251419 | 9.17x10 <sup>-102</sup> | 7.57x10 <sup>-99</sup>  |
| <i>TPX2</i>      | -4.89305 | 6.268985 | 2.32x10 <sup>-101</sup> | 1.83x10 <sup>-98</sup>  |
| <i>CDCA4</i>     | -2.59327 | 4.717324 | 5.22x10 <sup>-101</sup> | 3.93x10 <sup>-98</sup>  |
| <i>RAD54L</i>    | -4.6558  | 3.261019 | 1.29x10 <sup>-100</sup> | 9.28x10 <sup>-98</sup>  |
| <i>GINS1</i>     | -4.13041 | 4.107722 | 1.88x10 <sup>-99</sup>  | 1.30x10 <sup>-96</sup>  |
| <i>CBLC</i>      | -4.07363 | 4.040162 | 3.62x10 <sup>-99</sup>  | 2.41x10 <sup>-96</sup>  |
| <i>WDHD1</i>     | -2.80398 | 3.967423 | 1.13x10 <sup>-98</sup>  | 7.23x10 <sup>-96</sup>  |

|                 |          |          |                        |                        |
|-----------------|----------|----------|------------------------|------------------------|
| <i>CENPF</i>    | -4.48162 | 5.998163 | 2.30x10 <sup>-98</sup> | 1.38x10 <sup>-95</sup> |
| <i>CHEK1</i>    | -3.058   | 3.591322 | 2.86x10 <sup>-98</sup> | 1.65x10 <sup>-95</sup> |
| <i>CDC6</i>     | -4.29675 | 4.582723 | 3.63x10 <sup>-98</sup> | 2.03x10 <sup>-95</sup> |
| <i>PLK1</i>     | -4.28176 | 4.8041   | 1.42x10 <sup>-97</sup> | 7.67x10 <sup>-95</sup> |
| <i>UBE2C</i>    | -4.86288 | 4.935504 | 1.54x10 <sup>-97</sup> | 8.10x10 <sup>-95</sup> |
| <i>CDK1</i>     | -3.43735 | 5.158636 | 4.49x10 <sup>-97</sup> | 2.29x10 <sup>-94</sup> |
| <i>NEK2</i>     | -4.74742 | 3.765172 | 8.46x10 <sup>-97</sup> | 4.18x10 <sup>-94</sup> |
| <i>PVRL1</i>    | -4.56572 | 8.14562  | 2.26x10 <sup>-96</sup> | 1.09x10 <sup>-93</sup> |
| <i>RFC4</i>     | -3.37744 | 4.935055 | 5.43x10 <sup>-96</sup> | 2.54x10 <sup>-93</sup> |
| <i>C9orf140</i> | -4.60533 | 4.231757 | 5.96x10 <sup>-96</sup> | 2.72x10 <sup>-93</sup> |
| <i>TTK</i>      | -5.00657 | 3.887363 | 1.20x10 <sup>-94</sup> | 5.33x10 <sup>-92</sup> |
| <i>AURKA</i>    | -3.37531 | 4.345553 | 1.72x10 <sup>-94</sup> | 7.44x10 <sup>-92</sup> |
| <i>FERMT1</i>   | -4.67446 | 5.796954 | 1.93x10 <sup>-94</sup> | 8.17x10 <sup>-92</sup> |
| <i>SKA1</i>     | -4.41317 | 2.989894 | 2.96x10 <sup>-94</sup> | 1.22x10 <sup>-91</sup> |
| <i>SPAG5</i>    | -3.77988 | 4.980014 | 3.50x10 <sup>-94</sup> | 1.41x10 <sup>-91</sup> |
| <i>CCNB2</i>    | -4.40621 | 4.653534 | 2.94x10 <sup>-93</sup> | 1.16x10 <sup>-90</sup> |
| <i>UBE2T</i>    | -3.7991  | 3.78844  | 8.75x10 <sup>-93</sup> | 3.37x10 <sup>-90</sup> |
| <i>RAD51</i>    | -3.72392 | 3.201518 | 1.02x10 <sup>-92</sup> | 3.83x10 <sup>-90</sup> |
| <i>TROAP</i>    | -4.82987 | 3.782184 | 5.95x10 <sup>-92</sup> | 2.10x10 <sup>-89</sup> |
| <i>POLQ</i>     | -4.78819 | 3.234372 | 6.09x10 <sup>-92</sup> | 2.11x10 <sup>-89</sup> |
| <i>TIMELESS</i> | -2.47546 | 5.601544 | 9.95x10 <sup>-92</sup> | 3.38x10 <sup>-89</sup> |
| <i>FOXMI</i>    | -4.76956 | 6.02642  | 1.20x10 <sup>-91</sup> | 3.99x10 <sup>-89</sup> |
| <i>CDC20</i>    | -4.71667 | 5.237449 | 7.99x10 <sup>-91</sup> | 2.61x10 <sup>-88</sup> |
| <i>KIF2C</i>    | -4.60497 | 4.620996 | 1.32x10 <sup>-90</sup> | 4.22x10 <sup>-88</sup> |
| <i>PERP</i>     | -3.60804 | 9.748464 | 1.65x10 <sup>-90</sup> | 5.18x10 <sup>-88</sup> |
| <i>KIF4A</i>    | -4.683   | 4.312099 | 1.74x10 <sup>-90</sup> | 5.38x10 <sup>-88</sup> |
| <i>CENPA</i>    | -4.91588 | 2.88005  | 2.78x10 <sup>-90</sup> | 8.46x10 <sup>-88</sup> |
| <i>EFNA3</i>    | -3.83619 | 3.192915 | 4.73x10 <sup>-89</sup> | 1.39x10 <sup>-86</sup> |
| <i>ZWILCH</i>   | -2.02639 | 4.322197 | 4.94x10 <sup>-89</sup> | 1.43x10 <sup>-86</sup> |

|               |          |          |                        |                        |
|---------------|----------|----------|------------------------|------------------------|
| <i>CKAP2L</i> | -4.44089 | 3.326784 | $6.55 \times 10^{-89}$ | $1.86 \times 10^{-86}$ |
| <i>RECQL4</i> | -3.78741 | 4.040691 | $7.12 \times 10^{-89}$ | $1.99 \times 10^{-86}$ |
| <i>SLC6A8</i> | -4.1548  | 7.103439 | $8.14 \times 10^{-89}$ | $2.24 \times 10^{-86}$ |
| <i>PLK4</i>   | -2.88513 | 3.111121 | $9.88 \times 10^{-89}$ | $2.67 \times 10^{-86}$ |
| <i>LDB2</i>   | 3.109837 | 5.531568 | $1.79 \times 10^{-88}$ | $4.76 \times 10^{-86}$ |
| <i>KIFC1</i>  | -3.64567 | 4.715194 | $2.68 \times 10^{-88}$ | $7.03 \times 10^{-86}$ |
| <i>MAD2L1</i> | -3.582   | 4.311594 | $4.16 \times 10^{-88}$ | $1.08 \times 10^{-85}$ |
| <i>PSATI</i>  | -4.80546 | 5.586701 | $1.78 \times 10^{-87}$ | $4.54 \times 10^{-85}$ |
| <i>CCNF</i>   | -2.87544 | 4.216489 | $2.67 \times 10^{-87}$ | $6.70 \times 10^{-85}$ |
| <i>ESPL1</i>  | -4.04147 | 3.948758 | $3.04 \times 10^{-87}$ | $7.52 \times 10^{-85}$ |
| <i>HJURP</i>  | -4.75296 | 3.940219 | $3.26 \times 10^{-87}$ | $7.95 \times 10^{-85}$ |
| <i>KIF18B</i> | -5.00411 | 3.92039  | $4.60 \times 10^{-87}$ | $1.11 \times 10^{-84}$ |
| <i>KPNA2</i>  | -2.55637 | 6.826015 | $1.06 \times 10^{-86}$ | $2.52 \times 10^{-84}$ |
| <i>ZWINT</i>  | -3.25327 | 4.712101 | $2.01 \times 10^{-86}$ | $4.71 \times 10^{-84}$ |
| <i>BIRC5</i>  | -4.89327 | 4.39281  | $3.12 \times 10^{-86}$ | $7.21 \times 10^{-84}$ |
| <i>ESAM</i>   | 2.846381 | 6.740833 | $3.39 \times 10^{-86}$ | $7.72 \times 10^{-84}$ |
| <i>KIF14</i>  | -4.8279  | 3.34601  | $4.38 \times 10^{-86}$ | $9.84 \times 10^{-84}$ |
| <i>NUF2</i>   | -4.70421 | 3.619074 | $8.48 \times 10^{-86}$ | $1.88 \times 10^{-83}$ |
| <i>TK1</i>    | -3.47656 | 5.842862 | $1.02 \times 10^{-85}$ | $2.23 \times 10^{-83}$ |
| <i>FEN1</i>   | -2.45587 | 5.276814 | $1.71 \times 10^{-85}$ | $3.69 \times 10^{-83}$ |
| <i>NCAPG2</i> | -2.4201  | 4.823036 | $2.26 \times 10^{-85}$ | $4.82 \times 10^{-83}$ |
| <i>LYPD3</i>  | -6.22888 | 6.70015  | $2.28 \times 10^{-85}$ | $4.82 \times 10^{-83}$ |
| <i>CCNA2</i>  | -3.97414 | 4.592415 | $4.55 \times 10^{-85}$ | $9.49 \times 10^{-83}$ |
| <i>MCM8</i>   | -2.52201 | 4.074113 | $5.39 \times 10^{-85}$ | $1.11 \times 10^{-82}$ |
| <i>CEP55</i>  | -4.16985 | 4.549364 | $6.44 \times 10^{-85}$ | $1.31 \times 10^{-82}$ |
| <i>ORC6L</i>  | -4.03959 | 3.018829 | $8.68 \times 10^{-85}$ | $1.75 \times 10^{-82}$ |
| <i>CDCA3</i>  | -4.36745 | 3.506191 | $1.11 \times 10^{-84}$ | $2.21 \times 10^{-82}$ |
| <i>AURKB</i>  | -4.62739 | 3.812612 | $2.55 \times 10^{-84}$ | $5.01 \times 10^{-82}$ |
| <i>MCM7</i>   | -2.09883 | 7.085472 | $4.50 \times 10^{-84}$ | $8.76 \times 10^{-82}$ |

|                 |          |          |                        |                        |
|-----------------|----------|----------|------------------------|------------------------|
| <i>STIL</i>     | -3.3681  | 3.573105 | 4.77x10 <sup>-84</sup> | 9.18x10 <sup>-82</sup> |
| <i>IQGAP3</i>   | -4.0787  | 4.422777 | 7.88x10 <sup>-84</sup> | 1.50x10 <sup>-81</sup> |
| <i>DSP</i>      | -4.2349  | 9.606718 | 9.91x10 <sup>-84</sup> | 1.87x10 <sup>-81</sup> |
| <i>BLM</i>      | -3.08416 | 3.246158 | 1.64x10 <sup>-83</sup> | 3.05x10 <sup>-81</sup> |
| <i>CENPE</i>    | -3.68481 | 3.717836 | 2.79x10 <sup>-83</sup> | 5.14x10 <sup>-81</sup> |
| <i>MYO19</i>    | -2.00864 | 5.355888 | 2.96x10 <sup>-83</sup> | 5.40x10 <sup>-81</sup> |
| <i>TMEM132A</i> | -3.19439 | 6.127167 | 3.91x10 <sup>-83</sup> | 7.05x10 <sup>-81</sup> |
| <i>SRD5A1</i>   | -2.75592 | 4.422158 | 4.95x10 <sup>-83</sup> | 8.83x10 <sup>-81</sup> |
| <i>HMGA1</i>    | -2.80737 | 7.559378 | 5.65x10 <sup>-83</sup> | 9.98x10 <sup>-81</sup> |
| <i>CHAF1B</i>   | -2.7179  | 3.539039 | 7.62x10 <sup>-83</sup> | 1.33x10 <sup>-80</sup> |
| <i>ANLN</i>     | -4.63561 | 5.633302 | 1.52x10 <sup>-82</sup> | 2.63x10 <sup>-80</sup> |
| <i>RNASEH2A</i> | -2.21224 | 4.595759 | 1.37x10 <sup>-81</sup> | 2.35x10 <sup>-79</sup> |
| <i>CDC45</i>    | -4.99757 | 3.896009 | 1.67x10 <sup>-81</sup> | 2.84x10 <sup>-79</sup> |
| <i>ASPM</i>     | -4.5746  | 4.573554 | 2.05x10 <sup>-81</sup> | 3.44x10 <sup>-79</sup> |
| <i>EZH2</i>     | -3.18619 | 4.097243 | 2.13x10 <sup>-81</sup> | 3.55x10 <sup>-79</sup> |
| <i>IGSF9</i>    | -5.05318 | 5.493488 | 2.62x10 <sup>-81</sup> | 4.33x10 <sup>-79</sup> |
| <i>GJB3</i>     | -5.41113 | 4.883794 | 4.23x10 <sup>-81</sup> | 6.91x10 <sup>-79</sup> |
| <i>UCK2</i>     | -2.80492 | 4.466353 | 4.56x10 <sup>-81</sup> | 7.38x10 <sup>-79</sup> |
| <i>EPR1</i>     | -4.39847 | 4.48708  | 7.77x10 <sup>-81</sup> | 1.25x10 <sup>-78</sup> |
| <i>NUSAP1</i>   | -3.6213  | 5.178751 | 2.25x10 <sup>-80</sup> | 3.57x10 <sup>-78</sup> |
| <i>MYCT1</i>    | 2.93907  | 4.452095 | 4.59x10 <sup>-80</sup> | 7.22x10 <sup>-78</sup> |
| <i>FAM72B</i>   | -3.33444 | 2.832145 | 7.06x10 <sup>-80</sup> | 1.10x10 <sup>-77</sup> |
| <i>TRIP13</i>   | -3.99725 | 4.747456 | 1.44x10 <sup>-79</sup> | 2.23x10 <sup>-77</sup> |
| <i>ECE2</i>     | -3.38905 | 4.151688 | 1.92x10 <sup>-79</sup> | 2.95x10 <sup>-77</sup> |
| <i>BUB1</i>     | -3.68069 | 4.557703 | 1.96x10 <sup>-79</sup> | 2.98x10 <sup>-77</sup> |
| <i>CD302</i>    | 2.703107 | 6.666212 | 2.01x10 <sup>-79</sup> | 3.03x10 <sup>-77</sup> |
| <i>MCM10</i>    | -4.58518 | 3.362658 | 2.73x10 <sup>-79</sup> | 4.08x10 <sup>-77</sup> |
| <i>CENPH</i>    | -2.57361 | 3.298844 | 2.82x10 <sup>-79</sup> | 4.17x10 <sup>-77</sup> |
| <i>UHRF1</i>    | -4.19827 | 3.968804 | 3.37x10 <sup>-79</sup> | 4.94x10 <sup>-77</sup> |

|                |          |          |                        |                        |
|----------------|----------|----------|------------------------|------------------------|
| <i>HELLS</i>   | -3.7093  | 2.997328 | 3.90x10 <sup>-79</sup> | 5.67x10 <sup>-77</sup> |
| <i>CKS1B</i>   | -2.48171 | 5.382395 | 4.81x10 <sup>-79</sup> | 6.94x10 <sup>-77</sup> |
| <i>MELK</i>    | -4.86065 | 4.152735 | 2.17x10 <sup>-78</sup> | 3.11x10 <sup>-76</sup> |
| <i>ASF1B</i>   | -3.38012 | 4.445777 | 2.39x10 <sup>-78</sup> | 3.40x10 <sup>-76</sup> |
| <i>MYBL2</i>   | -4.82349 | 5.705319 | 2.76x10 <sup>-78</sup> | 3.89x10 <sup>-76</sup> |
| <i>NCAPD2</i>  | -2.32704 | 7.024874 | 3.26x10 <sup>-78</sup> | 4.56x10 <sup>-76</sup> |
| <i>TOP2A</i>   | -4.69102 | 7.022908 | 6.25x10 <sup>-78</sup> | 8.67x10 <sup>-76</sup> |
| <i>ATAD2</i>   | -2.45408 | 5.555292 | 7.60x10 <sup>-78</sup> | 1.05x10 <sup>-75</sup> |
| <i>SKA3</i>    | -4.16541 | 2.715004 | 9.14x10 <sup>-78</sup> | 1.25x10 <sup>-75</sup> |
| <i>FKBP4</i>   | -2.12581 | 7.222873 | 1.61x10 <sup>-77</sup> | 2.18x10 <sup>-75</sup> |
| <i>IGF2BP3</i> | -5.09464 | 4.72067  | 1.93x10 <sup>-77</sup> | 2.59x10 <sup>-75</sup> |
| <i>BRIP1</i>   | -3.84604 | 2.520153 | 3.40x10 <sup>-77</sup> | 4.53x10 <sup>-75</sup> |
| <i>TLL12</i>   | -2.23778 | 6.474908 | 5.38x10 <sup>-77</sup> | 7.11x10 <sup>-75</sup> |
| <i>TRIM29</i>  | -4.95173 | 8.25671  | 6.00x10 <sup>-77</sup> | 7.87x10 <sup>-75</sup> |
| <i>GTSE1</i>   | -4.0796  | 3.523157 | 7.52x10 <sup>-77</sup> | 9.80x10 <sup>-75</sup> |
| <i>ACVRL1</i>  | 2.887734 | 6.847666 | 9.46x10 <sup>-77</sup> | 1.22x10 <sup>-74</sup> |
| <i>TNS4</i>    | -5.58453 | 6.111207 | 2.02x10 <sup>-76</sup> | 2.59x10 <sup>-74</sup> |
| <i>DEPDC1</i>  | -4.60841 | 3.405783 | 2.19x10 <sup>-76</sup> | 2.79x10 <sup>-74</sup> |
| <i>BUB1B</i>   | -4.64372 | 4.321263 | 2.47x10 <sup>-76</sup> | 3.12x10 <sup>-74</sup> |
| <i>RAD54B</i>  | -2.79393 | 2.582883 | 2.90x10 <sup>-76</sup> | 3.64x10 <sup>-74</sup> |
| <i>ORC1L</i>   | -3.93054 | 3.066076 | 3.98x10 <sup>-76</sup> | 4.96x10 <sup>-74</sup> |
| <i>GINS4</i>   | -3.42934 | 3.3628   | 9.15x10 <sup>-76</sup> | 1.13x10 <sup>-73</sup> |
| <i>UBE2S</i>   | -2.82253 | 4.708741 | 1.18x10 <sup>-75</sup> | 1.45x10 <sup>-73</sup> |
| <i>PTTG1</i>   | -3.18219 | 4.544228 | 1.42x10 <sup>-75</sup> | 1.72x10 <sup>-73</sup> |
| <i>NDC80</i>   | -4.1641  | 3.586083 | 1.50x10 <sup>-75</sup> | 1.81x10 <sup>-73</sup> |
| <i>DEPDC1B</i> | -4.33088 | 2.78026  | 2.51x10 <sup>-75</sup> | 3.00x10 <sup>-73</sup> |
| <i>WDR62</i>   | -3.33849 | 3.520834 | 4.03x10 <sup>-75</sup> | 4.78x10 <sup>-73</sup> |
| <i>RAMP2</i>   | 2.998932 | 5.702213 | 6.77x10 <sup>-75</sup> | 7.98x10 <sup>-73</sup> |
| <i>GAPDH</i>   | -2.5004  | 11.67972 | 1.52x10 <sup>-74</sup> | 1.78x10 <sup>-72</sup> |

|                 |          |          |                        |                        |
|-----------------|----------|----------|------------------------|------------------------|
| <i>CDC48</i>    | -4.50806 | 4.847811 | 2.90x10 <sup>-74</sup> | 3.37x10 <sup>-72</sup> |
| <i>WWC2</i>     | 2.627394 | 6.382383 | 3.11x10 <sup>-74</sup> | 3.60x10 <sup>-72</sup> |
| <i>CLEC14A</i>  | 2.89057  | 6.100151 | 3.82x10 <sup>-74</sup> | 4.38x10 <sup>-72</sup> |
| <i>ROBO4</i>    | 3.315096 | 6.4594   | 5.15x10 <sup>-74</sup> | 5.87x10 <sup>-72</sup> |
| <i>KNTC1</i>    | -2.57743 | 4.506463 | 6.89x10 <sup>-74</sup> | 7.80x10 <sup>-72</sup> |
| <i>CCNE1</i>    | -4.61553 | 3.496116 | 1.17x10 <sup>-73</sup> | 1.32x10 <sup>-71</sup> |
| <i>RPL39L</i>   | -3.70475 | 4.31441  | 1.55x10 <sup>-73</sup> | 1.74x10 <sup>-71</sup> |
| <i>C16orf75</i> | -3.31829 | 3.932677 | 1.86x10 <sup>-73</sup> | 2.07x10 <sup>-71</sup> |
| <i>GINS2</i>    | -3.68752 | 3.652429 | 4.94x10 <sup>-73</sup> | 5.38x10 <sup>-71</sup> |
| <i>NUP155</i>   | -2.2167  | 5.385921 | 5.96x10 <sup>-73</sup> | 6.46x10 <sup>-71</sup> |
| <i>CENPW</i>    | -2.93556 | 3.605114 | 7.46x10 <sup>-73</sup> | 8.02x10 <sup>-71</sup> |
| <i>RAD51API</i> | -3.42597 | 3.67624  | 7.97x10 <sup>-73</sup> | 8.52x10 <sup>-71</sup> |
| <i>NXPH4</i>    | -6.25076 | 3.942049 | 1.29x10 <sup>-72</sup> | 1.37x10 <sup>-70</sup> |
| <i>SPC25</i>    | -4.0436  | 2.535675 | 8.20x10 <sup>-72</sup> | 8.61x10 <sup>-70</sup> |
| <i>PKMYT1</i>   | -4.32593 | 3.809187 | 9.16x10 <sup>-72</sup> | 9.56x10 <sup>-70</sup> |
| <i>C1orf112</i> | -2.42159 | 3.303597 | 1.07x10 <sup>-71</sup> | 1.11x10 <sup>-69</sup> |
| <i>FAM64A</i>   | -4.27649 | 2.707331 | 1.42x10 <sup>-71</sup> | 1.47x10 <sup>-69</sup> |
| <i>MARK1</i>    | -2.84718 | 4.431086 | 1.46x10 <sup>-71</sup> | 1.50x10 <sup>-69</sup> |
| <i>B4GALNT4</i> | -6.43318 | 3.737432 | 1.54x10 <sup>-71</sup> | 1.56x10 <sup>-69</sup> |
| <i>CDH5</i>     | 3.124016 | 7.43789  | 3.24x10 <sup>-71</sup> | 3.28x10 <sup>-69</sup> |
| <i>DUSP9</i>    | -7.28373 | 2.806757 | 3.53x10 <sup>-71</sup> | 3.56x10 <sup>-69</sup> |
| <i>ARTN</i>     | -4.97589 | 2.648982 | 3.77x10 <sup>-71</sup> | 3.78x10 <sup>-69</sup> |
| <i>CDT1</i>     | -3.80048 | 4.057167 | 7.41x10 <sup>-71</sup> | 7.37x10 <sup>-69</sup> |
| <i>DLGAP5</i>   | -4.72085 | 4.132129 | 2.49x10 <sup>-70</sup> | 2.46x10 <sup>-68</sup> |
| <i>CDC42</i>    | -4.33492 | 2.946562 | 3.63x10 <sup>-70</sup> | 3.57x10 <sup>-68</sup> |
| <i>LMNB2</i>    | -2.18678 | 6.789558 | 3.75x10 <sup>-70</sup> | 3.67x10 <sup>-68</sup> |
| <i>SKP2</i>     | -2.92639 | 4.228946 | 5.56x10 <sup>-70</sup> | 5.41x10 <sup>-68</sup> |
| <i>ARHGEF15</i> | 3.143403 | 5.028507 | 8.51x10 <sup>-70</sup> | 8.24x10 <sup>-68</sup> |
| <i>GRHL3</i>    | -6.99682 | 3.891488 | 3.70x10 <sup>-69</sup> | 3.48x10 <sup>-67</sup> |

|                 |          |          |                        |                        |
|-----------------|----------|----------|------------------------|------------------------|
| <i>MKI67</i>    | -3.94432 | 6.521831 | 4.25x10 <sup>-69</sup> | 3.98x10 <sup>-67</sup> |
| <i>RRM2</i>     | -3.98842 | 5.794487 | 5.77x10 <sup>-69</sup> | 5.35x10 <sup>-67</sup> |
| <i>CHEK2</i>    | -2.41694 | 3.957464 | 5.84x10 <sup>-69</sup> | 5.38x10 <sup>-67</sup> |
| <i>HSD17B6</i>  | 3.969838 | 5.52999  | 8.40x10 <sup>-69</sup> | 7.70x10 <sup>-67</sup> |
| <i>RCCI</i>     | -2.17719 | 5.149501 | 1.44x10 <sup>-68</sup> | 1.31x10 <sup>-66</sup> |
| <i>NCAPG</i>    | -3.84909 | 4.139745 | 2.93x10 <sup>-68</sup> | 2.65x10 <sup>-66</sup> |
| <i>PPP2R2C</i>  | -6.92416 | 4.577727 | 3.34x10 <sup>-68</sup> | 3.00x10 <sup>-66</sup> |
| <i>NFKBIL2</i>  | -2.93697 | 4.034768 | 4.17x10 <sup>-68</sup> | 3.72x10 <sup>-66</sup> |
| <i>FAM83F</i>   | -5.36304 | 3.398205 | 5.34x10 <sup>-68</sup> | 4.72x10 <sup>-66</sup> |
| <i>ARNTL2</i>   | -3.85264 | 4.340107 | 6.54x10 <sup>-68</sup> | 5.75x10 <sup>-66</sup> |
| <i>CENPO</i>    | -2.09131 | 3.076686 | 7.27x10 <sup>-68</sup> | 6.36x10 <sup>-66</sup> |
| <i>PTPRB</i>    | 3.236191 | 7.016246 | 9.20x10 <sup>-68</sup> | 8.01x10 <sup>-66</sup> |
| <i>ATAD5</i>    | -2.84579 | 2.738581 | 1.29x10 <sup>-67</sup> | 1.11x10 <sup>-65</sup> |
| <i>CELSR2</i>   | -3.01402 | 6.057768 | 1.41x10 <sup>-67</sup> | 1.21x10 <sup>-65</sup> |
| <i>PAICS</i>    | -2.26196 | 6.769506 | 1.64x10 <sup>-67</sup> | 1.40x10 <sup>-65</sup> |
| <i>FBXO45</i>   | -2.48571 | 5.58984  | 1.90x10 <sup>-67</sup> | 1.62x10 <sup>-65</sup> |
| <i>MLF1IP</i>   | -3.29228 | 4.306424 | 4.15x10 <sup>-67</sup> | 3.51x10 <sup>-65</sup> |
| <i>SIPRI</i>    | 3.305818 | 6.646158 | 5.22x10 <sup>-67</sup> | 4.39x10 <sup>-65</sup> |
| <i>AK3L1</i>    | -3.64106 | 3.685886 | 7.21x10 <sup>-67</sup> | 6.03x10 <sup>-65</sup> |
| <i>GPDIL</i>    | 2.190214 | 6.064725 | 8.39x10 <sup>-67</sup> | 6.99x10 <sup>-65</sup> |
| <i>TEK</i>      | 3.633255 | 5.800597 | 1.02x10 <sup>-66</sup> | 8.41x10 <sup>-65</sup> |
| <i>LASS3</i>    | -8.4727  | 3.932892 | 1.39x10 <sup>-66</sup> | 1.14x10 <sup>-64</sup> |
| <i>TNSI</i>     | 2.803693 | 9.262732 | 1.76x10 <sup>-66</sup> | 1.43x10 <sup>-64</sup> |
| <i>DSCC1</i>    | -2.67501 | 2.927873 | 4.34x10 <sup>-66</sup> | 3.51x10 <sup>-64</sup> |
| <i>GMPS</i>     | -2.16441 | 6.483141 | 4.45x10 <sup>-66</sup> | 3.59x10 <sup>-64</sup> |
| <i>C12orf48</i> | -3.26977 | 3.062993 | 6.20x10 <sup>-66</sup> | 4.97x10 <sup>-64</sup> |
| <i>PECAMI</i>   | 2.676959 | 7.430096 | 7.19x10 <sup>-66</sup> | 5.71x10 <sup>-64</sup> |
| <i>DSG2</i>     | -2.41823 | 7.90413  | 7.48x10 <sup>-66</sup> | 5.92x10 <sup>-64</sup> |
| <i>PKP1</i>     | -6.40364 | 8.9871   | 8.55x10 <sup>-66</sup> | 6.73x10 <sup>-64</sup> |

|                 |          |          |                        |                        |
|-----------------|----------|----------|------------------------|------------------------|
| <i>CASC5</i>    | -3.6921  | 3.18649  | 1.69x10 <sup>-65</sup> | 1.32x10 <sup>-63</sup> |
| <i>IRF6</i>     | -2.95376 | 6.507666 | 1.99x10 <sup>-65</sup> | 1.55x10 <sup>-63</sup> |
| <i>KIF18A</i>   | -2.54606 | 3.09778  | 2.01x10 <sup>-65</sup> | 1.56x10 <sup>-63</sup> |
| <i>KIAA0101</i> | -3.67127 | 3.811176 | 2.45x10 <sup>-65</sup> | 1.89x10 <sup>-63</sup> |
| <i>KANK3</i>    | 3.430905 | 4.227997 | 3.65x10 <sup>-65</sup> | 2.80x10 <sup>-63</sup> |
| <i>CCDC34</i>   | -2.53238 | 3.636207 | 3.83x10 <sup>-65</sup> | 2.92x10 <sup>-63</sup> |
| <i>SPTBN2</i>   | -3.07603 | 5.378788 | 4.26x10 <sup>-65</sup> | 3.22x10 <sup>-63</sup> |
| <i>SH2D3C</i>   | 2.696774 | 5.688417 | 4.34x10 <sup>-65</sup> | 3.27x10 <sup>-63</sup> |
| <i>C19orf48</i> | -2.1441  | 5.550747 | 5.04x10 <sup>-65</sup> | 3.78x10 <sup>-63</sup> |
| <i>SI00A2</i>   | -6.88729 | 8.384424 | 6.43x10 <sup>-65</sup> | 4.80x10 <sup>-63</sup> |
| <i>AK1</i>      | 2.292524 | 6.314949 | 8.81x10 <sup>-65</sup> | 6.55x10 <sup>-63</sup> |
| <i>PRAME</i>    | -8.57658 | 5.122258 | 1.03x10 <sup>-64</sup> | 7.63x10 <sup>-63</sup> |
| <i>NUDT1</i>    | -2.09221 | 4.011458 | 1.17x10 <sup>-64</sup> | 8.60x10 <sup>-63</sup> |
| <i>KIF15</i>    | -3.88874 | 2.993379 | 1.23x10 <sup>-64</sup> | 8.99x10 <sup>-63</sup> |
| <i>BRCA1</i>    | -2.27448 | 4.159558 | 1.67x10 <sup>-64</sup> | 1.22x10 <sup>-62</sup> |
| <i>KLC3</i>     | -3.33397 | 3.38323  | 1.69x10 <sup>-64</sup> | 1.23x10 <sup>-62</sup> |
| <i>FGF11</i>    | -4.61028 | 3.885547 | 2.03x10 <sup>-64</sup> | 1.47x10 <sup>-62</sup> |
| <i>CTSL2</i>    | -4.86183 | 4.694693 | 2.60x10 <sup>-64</sup> | 1.87x10 <sup>-62</sup> |
| <i>PPAT</i>     | -2.27724 | 4.03524  | 5.26x10 <sup>-64</sup> | 3.75x10 <sup>-62</sup> |
| <i>ACTL6A</i>   | -2.36394 | 6.472722 | 6.09x10 <sup>-64</sup> | 4.31x10 <sup>-62</sup> |
| <i>DPYSL2</i>   | 2.432087 | 8.105671 | 7.19x10 <sup>-64</sup> | 5.06x10 <sup>-62</sup> |
| <i>ARRB1</i>    | 2.744121 | 5.680505 | 1.53x10 <sup>-63</sup> | 1.07x10 <sup>-61</sup> |
| <i>ITGB4</i>    | -3.08831 | 8.474058 | 1.68x10 <sup>-63</sup> | 1.16x10 <sup>-61</sup> |
| <i>CENPL</i>    | -2.09478 | 3.087678 | 1.87x10 <sup>-63</sup> | 1.29x10 <sup>-61</sup> |
| <i>SERPINB5</i> | -7.32552 | 6.882133 | 1.92x10 <sup>-63</sup> | 1.32x10 <sup>-61</sup> |
| <i>KRT17</i>    | -6.99907 | 10.78276 | 2.01x10 <sup>-63</sup> | 1.38x10 <sup>-61</sup> |
| <i>C9orf100</i> | -3.06107 | 2.799227 | 2.53x10 <sup>-63</sup> | 1.72x10 <sup>-61</sup> |
| <i>GPR116</i>   | 3.450959 | 8.186602 | 2.60x10 <sup>-63</sup> | 1.76x10 <sup>-61</sup> |
| <i>C21orf45</i> | -2.00234 | 3.46893  | 3.35x10 <sup>-63</sup> | 2.26x10 <sup>-61</sup> |



|                 |          |          |                        |                        |
|-----------------|----------|----------|------------------------|------------------------|
| <i>COL7A1</i>   | -5.88437 | 6.570033 | 4.14x10 <sup>-63</sup> | 2.77x10 <sup>-61</sup> |
| <i>LMO7</i>     | 2.569673 | 8.418831 | 4.96x10 <sup>-63</sup> | 3.31x10 <sup>-61</sup> |
| <i>GNG11</i>    | 2.950962 | 6.046489 | 5.87x10 <sup>-63</sup> | 3.89x10 <sup>-61</sup> |
| <i>KRT5</i>     | -7.61666 | 11.61179 | 7.47x10 <sup>-63</sup> | 4.92x10 <sup>-61</sup> |
| <i>MMP11</i>    | -6.04895 | 6.875084 | 1.08x10 <sup>-62</sup> | 7.10x10 <sup>-61</sup> |
| <i>IL20RB</i>   | -5.8415  | 4.403332 | 1.14x10 <sup>-62</sup> | 7.42x10 <sup>-61</sup> |
| <i>PBK</i>      | -4.38269 | 3.409076 | 1.30x10 <sup>-62</sup> | 8.44x10 <sup>-61</sup> |
| <i>CHAF1A</i>   | -2.23629 | 4.628633 | 2.29x10 <sup>-62</sup> | 1.48x10 <sup>-60</sup> |
| <i>CDKN3</i>    | -3.7682  | 3.023087 | 2.66x10 <sup>-62</sup> | 1.72x10 <sup>-60</sup> |
| <i>TACC3</i>    | -2.04982 | 5.397757 | 3.18x10 <sup>-62</sup> | 2.04x10 <sup>-60</sup> |
| <i>GJB5</i>     | -5.93392 | 4.223375 | 9.08x10 <sup>-62</sup> | 5.76x10 <sup>-60</sup> |
| <i>EMP2</i>     | 2.544973 | 9.746809 | 9.11x10 <sup>-62</sup> | 5.76x10 <sup>-60</sup> |
| <i>SFXN1</i>    | -2.07287 | 5.290347 | 9.40x10 <sup>-62</sup> | 5.92x10 <sup>-60</sup> |
| <i>PRR11</i>    | -3.47274 | 2.817503 | 2.64x10 <sup>-61</sup> | 1.64x10 <sup>-59</sup> |
| <i>MEX3A</i>    | -4.2861  | 4.065079 | 7.07x10 <sup>-61</sup> | 4.32x10 <sup>-59</sup> |
| <i>CAT</i>      | 2.097815 | 7.576703 | 7.78x10 <sup>-61</sup> | 4.74x10 <sup>-59</sup> |
| <i>ECSCR</i>    | 2.856301 | 3.353628 | 9.22x10 <sup>-61</sup> | 5.60x10 <sup>-59</sup> |
| <i>SLC39A8</i>  | 3.394731 | 8.390256 | 1.04x10 <sup>-60</sup> | 6.29x10 <sup>-59</sup> |
| <i>JUP</i>      | -2.33104 | 9.487833 | 1.18x10 <sup>-60</sup> | 7.14x10 <sup>-59</sup> |
| <i>PAFAH1B3</i> | -2.46135 | 4.695469 | 1.34x10 <sup>-60</sup> | 8.08x10 <sup>-59</sup> |
| <i>CDC25A</i>   | -3.44299 | 2.754662 | 1.64x10 <sup>-60</sup> | 9.80x10 <sup>-59</sup> |
| <i>GJB6</i>     | -8.9158  | 6.100038 | 2.85x10 <sup>-60</sup> | 1.69x10 <sup>-58</sup> |
| <i>RAPGEFL1</i> | -3.74319 | 5.463314 | 3.63x10 <sup>-60</sup> | 2.15x10 <sup>-58</sup> |
| <i>KANK2</i>    | 2.244287 | 7.213633 | 5.58x10 <sup>-60</sup> | 3.27x10 <sup>-58</sup> |
| <i>TENC1</i>    | 2.316613 | 7.018529 | 5.90x10 <sup>-60</sup> | 3.45x10 <sup>-58</sup> |
| <i>RNASE4</i>   | 2.283423 | 5.54099  | 1.53x10 <sup>-59</sup> | 8.87x10 <sup>-58</sup> |
| <i>PVRL4</i>    | -3.15405 | 5.938416 | 1.70x10 <sup>-59</sup> | 9.83x10 <sup>-58</sup> |
| <i>C3orf21</i>  | -2.44812 | 5.191503 | 1.92x10 <sup>-59</sup> | 1.11x10 <sup>-57</sup> |
| <i>TP63</i>     | -5.85565 | 8.083056 | 2.27x10 <sup>-59</sup> | 1.31x10 <sup>-57</sup> |

|                 |          |          |                        |                        |
|-----------------|----------|----------|------------------------|------------------------|
| <i>PITX1</i>    | -6.37952 | 5.152062 | 2.77x10 <sup>-59</sup> | 1.59x10 <sup>-57</sup> |
| <i>DLC1</i>     | 3.452003 | 7.612387 | 2.90x10 <sup>-59</sup> | 1.66x10 <sup>-57</sup> |
| <i>KIF20A</i>   | -3.95766 | 4.385922 | 3.25x10 <sup>-59</sup> | 1.85x10 <sup>-57</sup> |
| <i>HOXA10</i>   | -5.35107 | 2.663065 | 3.64x10 <sup>-59</sup> | 2.07x10 <sup>-57</sup> |
| <i>ARHGAP31</i> | 2.35444  | 6.587991 | 4.30x10 <sup>-59</sup> | 2.44x10 <sup>-57</sup> |
| <i>GPR87</i>    | -6.55996 | 4.869629 | 1.12x10 <sup>-58</sup> | 6.31x10 <sup>-57</sup> |
| <i>EMCN</i>     | 3.52316  | 5.389746 | 1.16x10 <sup>-58</sup> | 6.54x10 <sup>-57</sup> |
| <i>KCTD1</i>    | -2.85552 | 5.276223 | 1.60x10 <sup>-58</sup> | 8.98x10 <sup>-57</sup> |
| <i>GNG4</i>     | -5.67745 | 3.30372  | 2.31x10 <sup>-58</sup> | 1.29x10 <sup>-56</sup> |
| <i>DLX5</i>     | -6.84456 | 3.75604  | 2.50x10 <sup>-58</sup> | 1.39x10 <sup>-56</sup> |
| <i>TPBG</i>     | -2.48176 | 5.412757 | 2.71x10 <sup>-58</sup> | 1.51x10 <sup>-56</sup> |
| <i>PAR6G</i>    | -2.39152 | 4.375565 | 3.97x10 <sup>-58</sup> | 2.20x10 <sup>-56</sup> |
| <i>ABCA12</i>   | -7.21343 | 3.850479 | 4.37x10 <sup>-58</sup> | 2.41x10 <sup>-56</sup> |
| <i>KREMEN2</i>  | -7.54217 | 3.482038 | 5.66x10 <sup>-58</sup> | 3.10x10 <sup>-56</sup> |
| <i>INCENP</i>   | -2.00086 | 4.647924 | 6.43x10 <sup>-58</sup> | 3.51x10 <sup>-56</sup> |
| <i>GPR146</i>   | 2.622757 | 4.109749 | 8.09x10 <sup>-58</sup> | 4.39x10 <sup>-56</sup> |
| <i>GEN1</i>     | -2.00381 | 4.016161 | 8.41x10 <sup>-58</sup> | 4.55x10 <sup>-56</sup> |
| <i>USHBP1</i>   | 3.34883  | 2.701403 | 9.43x10 <sup>-58</sup> | 5.07x10 <sup>-56</sup> |
| <i>MCM6</i>     | -2.07395 | 5.895195 | 9.66x10 <sup>-58</sup> | 5.17x10 <sup>-56</sup> |
| <i>APOBEC3B</i> | -3.6923  | 4.139559 | 1.50x10 <sup>-57</sup> | 7.96x10 <sup>-56</sup> |
| <i>SHROOM4</i>  | 2.466687 | 5.597301 | 1.87x10 <sup>-57</sup> | 9.89x10 <sup>-56</sup> |
| <i>BTBD11</i>   | -4.21979 | 3.749063 | 2.11x10 <sup>-57</sup> | 1.12x10 <sup>-55</sup> |
| <i>GIMAP8</i>   | 2.964351 | 5.673192 | 2.78x10 <sup>-57</sup> | 1.46x10 <sup>-55</sup> |
| <i>FANCD2</i>   | -2.20722 | 3.899825 | 2.88x10 <sup>-57</sup> | 1.51x10 <sup>-55</sup> |
| <i>PTHLH</i>    | -6.79503 | 6.370735 | 4.21x10 <sup>-57</sup> | 2.19x10 <sup>-55</sup> |
| <i>C5orf4</i>   | 3.030676 | 5.727476 | 4.49x10 <sup>-57</sup> | 2.33x10 <sup>-55</sup> |
| <i>F8</i>       | 2.489682 | 5.450695 | 5.04x10 <sup>-57</sup> | 2.61x10 <sup>-55</sup> |
| <i>DSC2</i>     | -3.17187 | 7.246664 | 1.13x10 <sup>-56</sup> | 5.76x10 <sup>-55</sup> |
| <i>PYCR1</i>    | -2.86254 | 5.750414 | 1.16x10 <sup>-56</sup> | 5.93x10 <sup>-55</sup> |

|                 |          |          |                        |                        |
|-----------------|----------|----------|------------------------|------------------------|
| <i>PCNA</i>     | -2.03028 | 6.818893 | 1.63x10 <sup>-56</sup> | 8.27x10 <sup>-55</sup> |
| <i>PKP3</i>     | -2.48468 | 6.378844 | 1.78x10 <sup>-56</sup> | 9.00x10 <sup>-55</sup> |
| <i>TRIM59</i>   | -2.71949 | 3.780836 | 3.46x10 <sup>-56</sup> | 1.74x10 <sup>-54</sup> |
| <i>FAM83D</i>   | -3.61746 | 4.998955 | 3.93x10 <sup>-56</sup> | 1.97x10 <sup>-54</sup> |
| <i>TGFBR2</i>   | 2.45654  | 8.416371 | 4.84x10 <sup>-56</sup> | 2.42x10 <sup>-54</sup> |
| <i>GPT2</i>     | -2.68962 | 4.5946   | 5.60x10 <sup>-56</sup> | 2.79x10 <sup>-54</sup> |
| <i>C15orf41</i> | -2.18562 | 3.338065 | 6.29x10 <sup>-56</sup> | 3.12x10 <sup>-54</sup> |
| <i>C1orf74</i>  | -2.46577 | 2.625211 | 6.38x10 <sup>-56</sup> | 3.16x10 <sup>-54</sup> |
| <i>DRAM1</i>    | 2.396852 | 7.373482 | 6.79x10 <sup>-56</sup> | 3.35x10 <sup>-54</sup> |
| <i>GGH</i>      | -2.45711 | 4.997983 | 7.40x10 <sup>-56</sup> | 3.64x10 <sup>-54</sup> |
| <i>GPX3</i>     | 3.313992 | 9.324068 | 8.33x10 <sup>-56</sup> | 4.08x10 <sup>-54</sup> |
| <i>GJB2</i>     | -6.91164 | 7.712482 | 9.96x10 <sup>-56</sup> | 4.86x10 <sup>-54</sup> |
| <i>EPN3</i>     | -3.8631  | 3.998104 | 1.33x10 <sup>-55</sup> | 6.48x10 <sup>-54</sup> |
| <i>HMGA2</i>    | -6.95792 | 3.829086 | 1.51x10 <sup>-55</sup> | 7.29x10 <sup>-54</sup> |
| <i>TMEM79</i>   | -3.08138 | 4.297169 | 2.50x10 <sup>-55</sup> | 1.20x10 <sup>-53</sup> |
| <i>SGOL2</i>    | -2.41305 | 3.508486 | 2.64x10 <sup>-55</sup> | 1.27x10 <sup>-53</sup> |
| <i>NPR1</i>     | 3.480726 | 5.56151  | 2.93x10 <sup>-55</sup> | 1.40x10 <sup>-53</sup> |
| <i>MSL3L2</i>   | -3.00997 | 2.740176 | 3.52x10 <sup>-55</sup> | 1.67x10 <sup>-53</sup> |
| <i>VSNL1</i>    | -3.7965  | 4.560099 | 4.28x10 <sup>-55</sup> | 2.02x10 <sup>-53</sup> |
| <i>GYLTL1B</i>  | -3.28492 | 4.958431 | 4.81x10 <sup>-55</sup> | 2.26x10 <sup>-53</sup> |
| <i>NOSTRIN</i>  | 3.644849 | 4.127209 | 6.48x10 <sup>-55</sup> | 3.03x10 <sup>-53</sup> |
| <i>CDK5R1</i>   | -2.82752 | 3.336746 | 6.66x10 <sup>-55</sup> | 3.10x10 <sup>-53</sup> |
| <i>C13orf15</i> | 3.136913 | 7.416601 | 9.49x10 <sup>-55</sup> | 4.41x10 <sup>-53</sup> |
| <i>HMGB3</i>    | -2.42577 | 6.098782 | 1.29x10 <sup>-54</sup> | 5.95x10 <sup>-53</sup> |
| <i>KRT6A</i>    | -8.66585 | 11.35785 | 2.48x10 <sup>-54</sup> | 1.13x10 <sup>-52</sup> |
| <i>CLEC3B</i>   | 4.362102 | 6.508674 | 3.35x10 <sup>-54</sup> | 1.51x10 <sup>-52</sup> |
| <i>JAM2</i>     | 2.67041  | 4.113585 | 3.38x10 <sup>-54</sup> | 1.52x10 <sup>-52</sup> |
| <i>FAM105A</i>  | 2.697922 | 5.693998 | 3.79x10 <sup>-54</sup> | 1.70x10 <sup>-52</sup> |
| <i>MF12</i>     | -4.60261 | 4.840362 | 4.12x10 <sup>-54</sup> | 1.85x10 <sup>-52</sup> |

|                |          |          |                        |                        |
|----------------|----------|----------|------------------------|------------------------|
| <i>DNA2</i>    | -2.76545 | 2.622751 | 4.47x10 <sup>-54</sup> | 2.00x10 <sup>-52</sup> |
| <i>CKMT1B</i>  | -4.29573 | 4.722626 | 4.94x10 <sup>-54</sup> | 2.20x10 <sup>-52</sup> |
| <i>ALG3</i>    | -2.0394  | 6.131926 | 6.36x10 <sup>-54</sup> | 2.81x10 <sup>-52</sup> |
| <i>E2F2</i>    | -3.03834 | 2.914336 | 7.23x10 <sup>-54</sup> | 3.18x10 <sup>-52</sup> |
| <i>PLEKHG6</i> | -3.54461 | 4.323257 | 7.23x10 <sup>-54</sup> | 3.18x10 <sup>-52</sup> |
| <i>HIGD1B</i>  | 3.609595 | 2.731788 | 7.64x10 <sup>-54</sup> | 3.35x10 <sup>-52</sup> |
| <i>RPS6KA2</i> | 2.42585  | 7.005512 | 1.95x10 <sup>-53</sup> | 8.47x10 <sup>-52</sup> |
| <i>SOX15</i>   | -4.68428 | 3.542579 | 2.21x10 <sup>-53</sup> | 9.52x10 <sup>-52</sup> |
| <i>FAT2</i>    | -6.51575 | 6.816648 | 2.45x10 <sup>-53</sup> | 1.05x10 <sup>-51</sup> |
| <i>ALDH3B2</i> | -5.0105  | 5.244885 | 2.61x10 <sup>-53</sup> | 1.12x10 <sup>-51</sup> |
| <i>GIMAP6</i>  | 2.673398 | 5.754386 | 3.43x10 <sup>-53</sup> | 1.46x10 <sup>-51</sup> |
| <i>HAP1</i>    | -5.75819 | 3.483262 | 3.82x10 <sup>-53</sup> | 1.63x10 <sup>-51</sup> |
| <i>LRP2BP</i>  | 2.786851 | 2.603561 | 3.88x10 <sup>-53</sup> | 1.65x10 <sup>-51</sup> |
| <i>CCDC48</i>  | 3.724028 | 3.544974 | 4.94x10 <sup>-53</sup> | 2.09x10 <sup>-51</sup> |
| <i>WFS1</i>    | 2.053335 | 6.956076 | 5.28x10 <sup>-53</sup> | 2.22x10 <sup>-51</sup> |
| <i>KRT6B</i>   | -8.602   | 9.138437 | 8.08x10 <sup>-53</sup> | 3.37x10 <sup>-51</sup> |
| <i>CKAP2</i>   | -2.18692 | 5.101482 | 9.03x10 <sup>-53</sup> | 3.76x10 <sup>-51</sup> |
| <i>PTGFRN</i>  | -2.69819 | 7.559772 | 1.01x10 <sup>-52</sup> | 4.18x10 <sup>-51</sup> |
| <i>MAGED4</i>  | -2.78122 | 2.673368 | 1.42x10 <sup>-52</sup> | 5.84x10 <sup>-51</sup> |
| <i>SOX17</i>   | 3.352926 | 3.058004 | 1.48x10 <sup>-52</sup> | 6.07x10 <sup>-51</sup> |
| <i>CGNL1</i>   | 2.759918 | 6.404519 | 2.69x10 <sup>-52</sup> | 1.10x10 <sup>-50</sup> |
| <i>LYVE1</i>   | 3.717878 | 5.230308 | 2.95x10 <sup>-52</sup> | 1.20x10 <sup>-50</sup> |
| <i>TMPRSS4</i> | -5.43497 | 6.737454 | 3.20x10 <sup>-52</sup> | 1.30x10 <sup>-50</sup> |
| <i>FRY</i>     | 2.498025 | 5.67269  | 3.45x10 <sup>-52</sup> | 1.40x10 <sup>-50</sup> |
| <i>GRK5</i>    | 2.434445 | 5.858527 | 4.89x10 <sup>-52</sup> | 1.98x10 <sup>-50</sup> |
| <i>GPRIN1</i>  | -3.05351 | 3.227281 | 5.66x10 <sup>-52</sup> | 2.28x10 <sup>-50</sup> |
| <i>SHE</i>     | 3.09186  | 5.100432 | 5.70x10 <sup>-52</sup> | 2.29x10 <sup>-50</sup> |
| <i>WDR72</i>   | -5.21351 | 4.817638 | 5.70x10 <sup>-52</sup> | 2.29x10 <sup>-50</sup> |
| <i>DSG3</i>    | -8.83359 | 8.161222 | 5.99x10 <sup>-52</sup> | 2.40x10 <sup>-50</sup> |

|                  |          |          |                        |                        |
|------------------|----------|----------|------------------------|------------------------|
| <i>GINS3</i>     | -2.11095 | 3.504201 | 8.66x10 <sup>-52</sup> | 3.45x10 <sup>-50</sup> |
| <i>EPT1</i>      | -2.06907 | 6.008372 | 9.20x10 <sup>-52</sup> | 3.65x10 <sup>-50</sup> |
| <i>CALML3</i>    | -8.86249 | 7.556532 | 9.23x10 <sup>-52</sup> | 3.66x10 <sup>-50</sup> |
| <i>STARD8</i>    | 2.692333 | 4.887728 | 1.18x10 <sup>-51</sup> | 4.67x10 <sup>-50</sup> |
| <i>TYMS</i>      | -2.79867 | 4.967644 | 1.23x10 <sup>-51</sup> | 4.85x10 <sup>-50</sup> |
| <i>PRKCE</i>     | 2.266904 | 5.128032 | 1.30x10 <sup>-51</sup> | 5.11x10 <sup>-50</sup> |
| <i>EIF4EBP1</i>  | -2.68394 | 5.791589 | 1.39x10 <sup>-51</sup> | 5.45x10 <sup>-50</sup> |
| <i>NPM3</i>      | -2.22699 | 4.472269 | 1.54x10 <sup>-51</sup> | 6.02x10 <sup>-50</sup> |
| <i>TIE1</i>      | 2.511464 | 5.990577 | 2.22x10 <sup>-51</sup> | 8.60x10 <sup>-50</sup> |
| <i>LOC642587</i> | -5.77252 | 4.42532  | 3.27x10 <sup>-51</sup> | 1.26x10 <sup>-49</sup> |
| <i>ARHGEF19</i>  | -2.39353 | 5.071006 | 3.52x10 <sup>-51</sup> | 1.35x10 <sup>-49</sup> |
| <i>HYAL1</i>     | 2.859223 | 5.264721 | 4.23x10 <sup>-51</sup> | 1.62x10 <sup>-49</sup> |
| <i>ERG</i>       | 2.369728 | 5.462931 | 4.79x10 <sup>-51</sup> | 1.83x10 <sup>-49</sup> |
| <i>SDPR</i>      | 3.880995 | 7.651886 | 5.25x10 <sup>-51</sup> | 2.00x10 <sup>-49</sup> |
| <i>FBXO32</i>    | -2.64902 | 4.396213 | 5.89x10 <sup>-51</sup> | 2.23x10 <sup>-49</sup> |
| <i>GPC1</i>      | -2.96798 | 7.798428 | 8.07x10 <sup>-51</sup> | 3.05x10 <sup>-49</sup> |
| <i>SC65</i>      | -2.28969 | 4.869623 | 8.75x10 <sup>-51</sup> | 3.30x10 <sup>-49</sup> |
| <i>CENPM</i>     | -3.02041 | 3.282091 | 9.59x10 <sup>-51</sup> | 3.60x10 <sup>-49</sup> |
| <i>CDH3</i>      | -4.00306 | 7.51887  | 9.76x10 <sup>-51</sup> | 3.65x10 <sup>-49</sup> |
| <i>C6orf167</i>  | -2.02706 | 3.938439 | 1.14x10 <sup>-50</sup> | 4.27x10 <sup>-49</sup> |
| <i>ABCC5</i>     | -3.26164 | 7.208291 | 1.18x10 <sup>-50</sup> | 4.41x10 <sup>-49</sup> |
| <i>DSC3</i>      | -6.60632 | 7.900467 | 1.38x10 <sup>-50</sup> | 5.11x10 <sup>-49</sup> |
| <i>PTPN21</i>    | 2.375582 | 5.674583 | 2.76x10 <sup>-50</sup> | 1.02x10 <sup>-48</sup> |
| <i>CBX2</i>      | -3.38417 | 4.31974  | 3.08x10 <sup>-50</sup> | 1.13x10 <sup>-48</sup> |
| <i>ALG1L</i>     | -4.43182 | 3.027578 | 3.45x10 <sup>-50</sup> | 1.26x10 <sup>-48</sup> |
| <i>LMNB1</i>     | -2.2377  | 5.488204 | 3.68x10 <sup>-50</sup> | 1.35x10 <sup>-48</sup> |
| <i>LIMCH1</i>    | 3.08728  | 7.843001 | 4.11x10 <sup>-50</sup> | 1.50x10 <sup>-48</sup> |
| <i>FHL1</i>      | 3.373304 | 7.705052 | 4.90x10 <sup>-50</sup> | 1.78x10 <sup>-48</sup> |
| <i>SORBS1</i>    | 2.557567 | 5.497898 | 5.33x10 <sup>-50</sup> | 1.92x10 <sup>-48</sup> |

|                |          |          |                        |                        |
|----------------|----------|----------|------------------------|------------------------|
| <i>CD34</i>    | 2.386922 | 6.767778 | 1.05x10 <sup>-49</sup> | 3.74x10 <sup>-48</sup> |
| <i>FANCA</i>   | -2.29596 | 3.970782 | 1.53x10 <sup>-49</sup> | 5.42x10 <sup>-48</sup> |
| <i>GPIHBP1</i> | 4.8858   | 4.940448 | 1.58x10 <sup>-49</sup> | 5.59x10 <sup>-48</sup> |
| <i>KRT15</i>   | -6.12383 | 8.690884 | 1.71x10 <sup>-49</sup> | 6.03x10 <sup>-48</sup> |
| <i>FANCE</i>   | -2.09935 | 4.072573 | 1.99x10 <sup>-49</sup> | 6.98x10 <sup>-48</sup> |
| <i>KRT6C</i>   | -8.72984 | 7.991372 | 2.02x10 <sup>-49</sup> | 7.09x10 <sup>-48</sup> |
| <i>AQP1</i>    | 3.283663 | 9.880569 | 2.18x10 <sup>-49</sup> | 7.60x10 <sup>-48</sup> |
| <i>SHCBP1</i>  | -2.84483 | 3.294857 | 2.43x10 <sup>-49</sup> | 8.47x10 <sup>-48</sup> |
| <i>LY6K</i>    | -4.51126 | 3.581046 | 2.82x10 <sup>-49</sup> | 9.80x10 <sup>-48</sup> |
| <i>MAGED4B</i> | -2.88368 | 4.388584 | 2.88x10 <sup>-49</sup> | 9.98x10 <sup>-48</sup> |
| <i>SYNE1</i>   | 2.70058  | 7.066221 | 3.10x10 <sup>-49</sup> | 1.07x10 <sup>-47</sup> |
| <i>AHCYL2</i>  | 2.402403 | 6.898691 | 3.31x10 <sup>-49</sup> | 1.14x10 <sup>-47</sup> |
| <i>CEP72</i>   | -2.03944 | 2.637831 | 4.34x10 <sup>-49</sup> | 1.49x10 <sup>-47</sup> |
| <i>PFN2</i>    | -2.78825 | 7.039529 | 5.53x10 <sup>-49</sup> | 1.89x10 <sup>-47</sup> |
| <i>GRHL1</i>   | -3.03482 | 4.984196 | 6.71x10 <sup>-49</sup> | 2.29x10 <sup>-47</sup> |
| <i>CD93</i>    | 2.630644 | 8.040143 | 6.81x10 <sup>-49</sup> | 2.32x10 <sup>-47</sup> |
| <i>HMMR</i>    | -3.42117 | 3.483841 | 7.10x10 <sup>-49</sup> | 2.41x10 <sup>-47</sup> |
| <i>FIGNL1</i>  | -2.11229 | 4.054351 | 7.60x10 <sup>-49</sup> | 2.57x10 <sup>-47</sup> |
| <i>SUSD2</i>   | 4.118405 | 8.459855 | 7.88x10 <sup>-49</sup> | 2.66x10 <sup>-47</sup> |
| <i>COL17A1</i> | -6.5861  | 7.595181 | 1.89x10 <sup>-48</sup> | 6.34x10 <sup>-47</sup> |
| <i>MMP12</i>   | -5.80126 | 5.627573 | 2.04x10 <sup>-48</sup> | 6.81x10 <sup>-47</sup> |
| <i>P2RY14</i>  | 2.613732 | 2.556869 | 3.13x10 <sup>-48</sup> | 1.04x10 <sup>-46</sup> |
| <i>RHOJ</i>    | 2.387947 | 4.002357 | 3.25x10 <sup>-48</sup> | 1.08x10 <sup>-46</sup> |
| <i>BCL6B</i>   | 2.373048 | 4.861791 | 3.56x10 <sup>-48</sup> | 1.18x10 <sup>-46</sup> |
| <i>FHL5</i>    | 3.929572 | 3.154317 | 4.26x10 <sup>-48</sup> | 1.40x10 <sup>-46</sup> |
| <i>FOXF1</i>   | 2.820708 | 4.76356  | 4.83x10 <sup>-48</sup> | 1.59x10 <sup>-46</sup> |
| <i>CLSPN</i>   | -3.50435 | 2.832599 | 5.04x10 <sup>-48</sup> | 1.65x10 <sup>-46</sup> |
| <i>CCNE2</i>   | -3.0905  | 3.145394 | 5.33x10 <sup>-48</sup> | 1.74x10 <sup>-46</sup> |
| <i>PHACTR1</i> | 2.925955 | 3.081975 | 6.46x10 <sup>-48</sup> | 2.10x10 <sup>-46</sup> |

|                |          |          |                        |                        |
|----------------|----------|----------|------------------------|------------------------|
| <i>ODZ4</i>    | -3.17701 | 4.806944 | 6.69x10 <sup>-48</sup> | 2.17x10 <sup>-46</sup> |
| <i>LRRC36</i>  | 4.619827 | 3.167507 | 7.79x10 <sup>-48</sup> | 2.52x10 <sup>-46</sup> |
| <i>EPHB3</i>   | -2.99087 | 5.838426 | 8.92x10 <sup>-48</sup> | 2.88x10 <sup>-46</sup> |
| <i>PCDH12</i>  | 2.502257 | 5.404717 | 1.21x10 <sup>-47</sup> | 3.88x10 <sup>-46</sup> |
| <i>RTKN2</i>   | 3.725844 | 6.935769 | 1.21x10 <sup>-47</sup> | 3.89x10 <sup>-46</sup> |
| <i>MIF</i>     | -2.02617 | 7.916107 | 1.34x10 <sup>-47</sup> | 4.28x10 <sup>-46</sup> |
| <i>RAMP3</i>   | 3.386078 | 5.94305  | 1.58x10 <sup>-47</sup> | 5.04x10 <sup>-46</sup> |
| <i>LGALS7B</i> | -7.76471 | 3.916869 | 1.95x10 <sup>-47</sup> | 6.19x10 <sup>-46</sup> |
| <i>HSPB6</i>   | 3.426169 | 5.407266 | 2.27x10 <sup>-47</sup> | 7.16x10 <sup>-46</sup> |
| <i>INMT</i>    | 4.445275 | 7.198748 | 2.78x10 <sup>-47</sup> | 8.72x10 <sup>-46</sup> |
| <i>CABYR</i>   | -4.76207 | 3.060319 | 2.80x10 <sup>-47</sup> | 8.77x10 <sup>-46</sup> |
| <i>CDCA7</i>   | -3.51572 | 4.209152 | 3.26x10 <sup>-47</sup> | 1.02x10 <sup>-45</sup> |
| <i>DLX6</i>    | -8.79802 | 2.514852 | 5.08x10 <sup>-47</sup> | 1.57x10 <sup>-45</sup> |
| <i>SYT15</i>   | 3.435305 | 4.888237 | 7.65x10 <sup>-47</sup> | 2.36x10 <sup>-45</sup> |
| <i>RHOV</i>    | -4.46342 | 4.992698 | 7.96x10 <sup>-47</sup> | 2.45x10 <sup>-45</sup> |
| <i>GPM6A</i>   | 5.45107  | 4.708973 | 1.07x10 <sup>-46</sup> | 3.26x10 <sup>-45</sup> |
| <i>EPHA1</i>   | -2.08378 | 4.599197 | 1.22x10 <sup>-46</sup> | 3.72x10 <sup>-45</sup> |
| <i>PROM2</i>   | -3.40362 | 6.323373 | 1.35x10 <sup>-46</sup> | 4.11x10 <sup>-45</sup> |
| <i>EPAS1</i>   | 2.91354  | 10.36945 | 1.88x10 <sup>-46</sup> | 5.69x10 <sup>-45</sup> |
| <i>TMEM117</i> | -2.87337 | 3.249503 | 2.48x10 <sup>-46</sup> | 7.41x10 <sup>-45</sup> |
| <i>CAPNS2</i>  | -6.50134 | 3.176612 | 3.48x10 <sup>-46</sup> | 1.04x10 <sup>-44</sup> |
| <i>A2M</i>     | 2.976709 | 11.54099 | 4.06x10 <sup>-46</sup> | 1.20x10 <sup>-44</sup> |
| <i>CLIC5</i>   | 4.705406 | 7.639607 | 7.06x10 <sup>-46</sup> | 2.08x10 <sup>-44</sup> |
| <i>HR</i>      | -4.23757 | 4.933036 | 7.08x10 <sup>-46</sup> | 2.08x10 <sup>-44</sup> |
| <i>WASF1</i>   | -2.67949 | 4.070553 | 7.13x10 <sup>-46</sup> | 2.10x10 <sup>-44</sup> |
| <i>HSPA12B</i> | 2.727733 | 4.418367 | 9.11x10 <sup>-46</sup> | 2.67x10 <sup>-44</sup> |
| <i>NME1</i>    | -2.06792 | 6.082728 | 9.12x10 <sup>-46</sup> | 2.67x10 <sup>-44</sup> |
| <i>TAL1</i>    | 3.02603  | 3.357071 | 1.01x10 <sup>-45</sup> | 2.96x10 <sup>-44</sup> |
| <i>EGLN3</i>   | -3.46126 | 5.950525 | 1.05x10 <sup>-45</sup> | 3.07x10 <sup>-44</sup> |

|                 |          |          |                        |                        |
|-----------------|----------|----------|------------------------|------------------------|
| <i>GPR133</i>   | 3.787435 | 5.545143 | 1.18x10 <sup>-45</sup> | 3.43x10 <sup>-44</sup> |
| <i>TMEM100</i>  | 5.070713 | 6.101674 | 1.26x10 <sup>-45</sup> | 3.65x10 <sup>-44</sup> |
| <i>RAI2</i>     | 2.343733 | 4.712651 | 1.46x10 <sup>-45</sup> | 4.20x10 <sup>-44</sup> |
| <i>FGD5</i>     | 2.280967 | 5.896916 | 1.61x10 <sup>-45</sup> | 4.61x10 <sup>-44</sup> |
| <i>VWF</i>      | 2.800857 | 9.532872 | 1.84x10 <sup>-45</sup> | 5.27x10 <sup>-44</sup> |
| <i>CCDC69</i>   | 2.197889 | 6.366289 | 1.94x10 <sup>-45</sup> | 5.56x10 <sup>-44</sup> |
| <i>C6orf174</i> | 3.516351 | 3.861744 | 3.29x10 <sup>-45</sup> | 9.34x10 <sup>-44</sup> |
| <i>DAPL1</i>    | -7.46563 | 4.780592 | 4.06x10 <sup>-45</sup> | 1.14x10 <sup>-43</sup> |
| <i>LEPR</i>     | 2.579886 | 5.411548 | 9.22x10 <sup>-45</sup> | 2.58x10 <sup>-43</sup> |
| <i>GLDN</i>     | 3.04605  | 4.162327 | 1.28x10 <sup>-44</sup> | 3.55x10 <sup>-43</sup> |
| <i>DTL</i>      | -2.84903 | 4.295339 | 1.32x10 <sup>-44</sup> | 3.64x10 <sup>-43</sup> |
| <i>NOTCH4</i>   | 2.274829 | 5.803558 | 1.52x10 <sup>-44</sup> | 4.19x10 <sup>-43</sup> |
| <i>TCF21</i>    | 3.867168 | 5.630357 | 1.55x10 <sup>-44</sup> | 4.25x10 <sup>-43</sup> |
| <i>LAD1</i>     | -2.58522 | 7.29057  | 1.58x10 <sup>-44</sup> | 4.34x10 <sup>-43</sup> |
| <i>C11orf41</i> | -4.79817 | 3.521409 | 1.60x10 <sup>-44</sup> | 4.38x10 <sup>-43</sup> |
| <i>SRRM3</i>    | -3.63702 | 2.839727 | 2.23x10 <sup>-44</sup> | 6.07x10 <sup>-43</sup> |
| <i>KRT14</i>    | -9.3499  | 9.760411 | 3.29x10 <sup>-44</sup> | 8.92x10 <sup>-43</sup> |
| <i>FAM83A</i>   | -6.77295 | 5.593375 | 3.59x10 <sup>-44</sup> | 9.72x10 <sup>-43</sup> |
| <i>ATP11A</i>   | 2.049079 | 7.542311 | 4.26x10 <sup>-44</sup> | 1.15x10 <sup>-42</sup> |
| <i>KCNT2</i>    | 3.574002 | 2.552952 | 4.33x10 <sup>-44</sup> | 1.17x10 <sup>-42</sup> |
| <i>LIMS2</i>    | 2.725147 | 5.890039 | 5.85x10 <sup>-44</sup> | 1.56x10 <sup>-42</sup> |
| <i>F10</i>      | 2.805426 | 2.539357 | 5.89x10 <sup>-44</sup> | 1.57x10 <sup>-42</sup> |
| <i>ZNF367</i>   | -2.45749 | 3.25446  | 6.67x10 <sup>-44</sup> | 1.77x10 <sup>-42</sup> |
| <i>CHTF18</i>   | -2.27594 | 3.70107  | 7.29x10 <sup>-44</sup> | 1.93x10 <sup>-42</sup> |
| <i>CALCRL</i>   | 2.706817 | 6.832846 | 8.06x10 <sup>-44</sup> | 2.13x10 <sup>-42</sup> |
| <i>FST</i>      | -3.59209 | 4.153264 | 1.09x10 <sup>-43</sup> | 2.85x10 <sup>-42</sup> |
| <i>SLC6A15</i>  | -7.2435  | 3.3057   | 1.23x10 <sup>-43</sup> | 3.24x10 <sup>-42</sup> |
| <i>KRT16</i>    | -8.79823 | 9.347233 | 1.40x10 <sup>-43</sup> | 3.65x10 <sup>-42</sup> |
| <i>CNFN</i>     | -5.74277 | 3.498766 | 1.50x10 <sup>-43</sup> | 3.93x10 <sup>-42</sup> |



|                  |          |          |                        |                        |
|------------------|----------|----------|------------------------|------------------------|
| <i>DISP1</i>     | 2.166057 | 4.307981 | 1.65x10 <sup>-43</sup> | 4.30x10 <sup>-42</sup> |
| <i>LGALS7</i>    | -7.72958 | 4.564785 | 1.87x10 <sup>-43</sup> | 4.86x10 <sup>-42</sup> |
| <i>PGM5</i>      | 3.448198 | 4.325886 | 1.90x10 <sup>-43</sup> | 4.93x10 <sup>-42</sup> |
| <i>FOXE1</i>     | -7.94982 | 5.263896 | 3.24x10 <sup>-43</sup> | 8.37x10 <sup>-42</sup> |
| <i>C20orf160</i> | 2.620949 | 3.296846 | 3.35x10 <sup>-43</sup> | 8.63x10 <sup>-42</sup> |
| <i>GALNT14</i>   | -4.6497  | 4.173655 | 3.42x10 <sup>-43</sup> | 8.80x10 <sup>-42</sup> |
| <i>CNTNAP2</i>   | -5.2525  | 4.320414 | 3.99x10 <sup>-43</sup> | 1.02x10 <sup>-41</sup> |
| <i>NUDT11</i>    | -3.60118 | 2.518538 | 5.06x10 <sup>-43</sup> | 1.29x10 <sup>-41</sup> |
| <i>TNFSF13</i>   | 2.121833 | 6.46209  | 5.43x10 <sup>-43</sup> | 1.38x10 <sup>-41</sup> |
| <i>PRX</i>       | 3.467104 | 5.977994 | 5.62x10 <sup>-43</sup> | 1.43x10 <sup>-41</sup> |
| <i>FAM111B</i>   | -3.42989 | 3.617241 | 5.87x10 <sup>-43</sup> | 1.49x10 <sup>-41</sup> |
| <i>NLRC4</i>     | 2.705088 | 3.312515 | 6.10x10 <sup>-43</sup> | 1.54x10 <sup>-41</sup> |
| <i>RHCG</i>      | -8.17525 | 5.254395 | 6.19x10 <sup>-43</sup> | 1.56x10 <sup>-41</sup> |
| <i>SH3BP5</i>    | 2.038192 | 6.465182 | 8.57x10 <sup>-43</sup> | 2.16x10 <sup>-41</sup> |
| <i>GCOM1</i>     | 3.712314 | 5.244329 | 9.13x10 <sup>-43</sup> | 2.29x10 <sup>-41</sup> |
| <i>ACE</i>       | 2.312551 | 6.924942 | 1.19x10 <sup>-42</sup> | 2.98x10 <sup>-41</sup> |
| <i>VEPH1</i>     | 4.002778 | 4.841639 | 1.43x10 <sup>-42</sup> | 3.54x10 <sup>-41</sup> |
| <i>BCL11A</i>    | -3.24612 | 4.367623 | 1.96x10 <sup>-42</sup> | 4.81x10 <sup>-41</sup> |
| <i>SPOCK1</i>    | -3.54715 | 3.973073 | 2.26x10 <sup>-42</sup> | 5.54x10 <sup>-41</sup> |
| <i>STX11</i>     | 2.628161 | 5.583791 | 2.63x10 <sup>-42</sup> | 6.41x10 <sup>-41</sup> |
| <i>BARX2</i>     | -4.69436 | 3.397965 | 2.75x10 <sup>-42</sup> | 6.68x10 <sup>-41</sup> |
| <i>EROIL</i>     | -2.31843 | 6.6394   | 3.91x10 <sup>-42</sup> | 9.45x10 <sup>-41</sup> |
| <i>ASNS</i>      | -2.30664 | 5.315785 | 3.99x10 <sup>-42</sup> | 9.63x10 <sup>-41</sup> |
| <i>MMRN1</i>     | 3.383554 | 4.807796 | 4.36x10 <sup>-42</sup> | 1.05x10 <sup>-40</sup> |
| <i>B4GALNT1</i>  | -4.1438  | 2.792299 | 4.37x10 <sup>-42</sup> | 1.05x10 <sup>-40</sup> |
| <i>SEMA3G</i>    | 3.103848 | 5.286223 | 4.92x10 <sup>-42</sup> | 1.18x10 <sup>-40</sup> |
| <i>MFNG</i>      | 2.111447 | 4.838954 | 5.66x10 <sup>-42</sup> | 1.36x10 <sup>-40</sup> |
| <i>ETV4</i>      | -3.74688 | 4.541846 | 6.46x10 <sup>-42</sup> | 1.54x10 <sup>-40</sup> |
| <i>ABCC6</i>     | 3.290126 | 3.929643 | 8.11x10 <sup>-42</sup> | 1.91x10 <sup>-40</sup> |

|                 |          |          |                        |                        |
|-----------------|----------|----------|------------------------|------------------------|
| <i>ANGPTL1</i>  | 3.430697 | 3.011864 | 8.34x10 <sup>-42</sup> | 1.96x10 <sup>-40</sup> |
| <i>PIGX</i>     | -2.24975 | 5.578072 | 1.01x10 <sup>-41</sup> | 2.34x10 <sup>-40</sup> |
| <i>PHGDH</i>    | -2.45972 | 6.025303 | 1.02x10 <sup>-41</sup> | 2.36x10 <sup>-40</sup> |
| <i>SELENBP1</i> | 3.50954  | 7.77497  | 1.03x10 <sup>-41</sup> | 2.38x10 <sup>-40</sup> |
| <i>SORD</i>     | -2.17576 | 4.95255  | 1.07x10 <sup>-41</sup> | 2.47x10 <sup>-40</sup> |
| <i>SLC7A5</i>   | -3.27626 | 7.419744 | 1.20x10 <sup>-41</sup> | 2.77x10 <sup>-40</sup> |
| <i>MFSD2A</i>   | 2.439633 | 6.09501  | 1.31x10 <sup>-41</sup> | 3.00x10 <sup>-40</sup> |
| <i>OVOL1</i>    | -3.94777 | 3.768429 | 1.40x10 <sup>-41</sup> | 3.21x10 <sup>-40</sup> |
| <i>GSTM5</i>    | 2.843008 | 3.277878 | 1.61x10 <sup>-41</sup> | 3.68x10 <sup>-40</sup> |
| <i>PNCK</i>     | -5.99447 | 2.778359 | 1.63x10 <sup>-41</sup> | 3.70x10 <sup>-40</sup> |
| <i>SLC16A1</i>  | -2.73112 | 6.107739 | 1.76x10 <sup>-41</sup> | 4.01x10 <sup>-40</sup> |
| <i>GPX2</i>     | -6.65956 | 6.999808 | 1.98x10 <sup>-41</sup> | 4.49x10 <sup>-40</sup> |
| <i>C11orf82</i> | -2.2657  | 3.451808 | 2.30x10 <sup>-41</sup> | 5.19x10 <sup>-40</sup> |
| <i>ETNK2</i>    | -2.23785 | 4.005852 | 3.01x10 <sup>-41</sup> | 6.75x10 <sup>-40</sup> |
| <i>TNXB</i>     | 4.087045 | 7.425518 | 3.03x10 <sup>-41</sup> | 6.79x10 <sup>-40</sup> |
| <i>CXorf36</i>  | 2.405787 | 4.862807 | 3.16x10 <sup>-41</sup> | 7.05x10 <sup>-40</sup> |
| <i>ALDH2</i>    | 2.038833 | 8.471098 | 3.30x10 <sup>-41</sup> | 7.35x10 <sup>-40</sup> |
| <i>PLEK2</i>    | -3.22871 | 3.872451 | 4.50x10 <sup>-41</sup> | 9.93x10 <sup>-40</sup> |
| <i>FSCN1</i>    | -2.82365 | 8.146401 | 4.98x10 <sup>-41</sup> | 1.10x10 <sup>-39</sup> |
| <i>HES2</i>     | -3.56109 | 4.399999 | 5.75x10 <sup>-41</sup> | 1.26x10 <sup>-39</sup> |
| <i>SMO</i>      | -2.40263 | 4.939022 | 5.75x10 <sup>-41</sup> | 1.26x10 <sup>-39</sup> |
| <i>JAG1</i>     | -2.43561 | 7.828087 | 6.32x10 <sup>-41</sup> | 1.38x10 <sup>-39</sup> |
| <i>BIK</i>      | -2.97724 | 2.672521 | 6.53x10 <sup>-41</sup> | 1.43x10 <sup>-39</sup> |
| <i>LPL</i>      | 3.293389 | 6.94431  | 7.29x10 <sup>-41</sup> | 1.58x10 <sup>-39</sup> |
| <i>CYB5A</i>    | 2.181211 | 7.289453 | 8.32x10 <sup>-41</sup> | 1.80x10 <sup>-39</sup> |
| <i>DNMT3B</i>   | -3.37299 | 2.926086 | 8.49x10 <sup>-41</sup> | 1.83x10 <sup>-39</sup> |
| <i>CFP</i>      | 3.04142  | 3.252943 | 9.17x10 <sup>-41</sup> | 1.97x10 <sup>-39</sup> |
| <i>HBA2</i>     | 4.573881 | 8.154836 | 1.02x10 <sup>-40</sup> | 2.19x10 <sup>-39</sup> |
| <i>FRMD6</i>    | -2.40225 | 6.206758 | 1.11x10 <sup>-40</sup> | 2.36x10 <sup>-39</sup> |

|                 |          |          |                        |                        |
|-----------------|----------|----------|------------------------|------------------------|
| <i>RNASE1</i>   | 2.609509 | 8.995371 | 1.26x10 <sup>-40</sup> | 2.68x10 <sup>-39</sup> |
| <i>EDNRB</i>    | 3.637507 | 6.547833 | 1.29x10 <sup>-40</sup> | 2.75x10 <sup>-39</sup> |
| <i>IGF2BP2</i>  | -2.84681 | 5.943681 | 1.44x10 <sup>-40</sup> | 3.05x10 <sup>-39</sup> |
| <i>C4orf31</i>  | 3.879379 | 6.867799 | 1.65x10 <sup>-40</sup> | 3.49x10 <sup>-39</sup> |
| <i>SLC1A1</i>   | 3.300588 | 5.372674 | 1.70x10 <sup>-40</sup> | 3.60x10 <sup>-39</sup> |
| <i>GPR115</i>   | -5.67407 | 2.891574 | 2.63x10 <sup>-40</sup> | 5.52x10 <sup>-39</sup> |
| <i>RASL12</i>   | 2.263645 | 4.59803  | 2.65x10 <sup>-40</sup> | 5.55x10 <sup>-39</sup> |
| <i>HBB</i>      | 4.789439 | 8.704721 | 2.99x10 <sup>-40</sup> | 6.25x10 <sup>-39</sup> |
| <i>CLCN2</i>    | -2.39767 | 2.979077 | 3.30x10 <sup>-40</sup> | 6.89x10 <sup>-39</sup> |
| <i>CCRL1</i>    | 2.80662  | 3.025554 | 3.84x10 <sup>-40</sup> | 7.97x10 <sup>-39</sup> |
| <i>ENG</i>      | 2.0827   | 8.219026 | 3.85x10 <sup>-40</sup> | 7.97x10 <sup>-39</sup> |
| <i>RAC3</i>     | -2.82895 | 3.2689   | 4.81x10 <sup>-40</sup> | 9.94x10 <sup>-39</sup> |
| <i>ADCY4</i>    | 2.539404 | 3.910939 | 5.33x10 <sup>-40</sup> | 1.10x10 <sup>-38</sup> |
| <i>ATOH8</i>    | 3.897688 | 5.560001 | 6.73x10 <sup>-40</sup> | 1.38x10 <sup>-38</sup> |
| <i>TMEM125</i>  | 3.187307 | 6.110968 | 6.80x10 <sup>-40</sup> | 1.40x10 <sup>-38</sup> |
| <i>PKHD1L1</i>  | 4.473107 | 2.931785 | 7.84x10 <sup>-40</sup> | 1.61x10 <sup>-38</sup> |
| <i>TMEM158</i>  | -3.49411 | 3.387331 | 7.95x10 <sup>-40</sup> | 1.63x10 <sup>-38</sup> |
| <i>THOC3</i>    | -2.14818 | 5.598788 | 8.09x10 <sup>-40</sup> | 1.65x10 <sup>-38</sup> |
| <i>FBLN5</i>    | 2.55675  | 6.760589 | 8.83x10 <sup>-40</sup> | 1.80x10 <sup>-38</sup> |
| <i>CIQTNF7</i>  | 3.508423 | 3.450278 | 1.35x10 <sup>-39</sup> | 2.74x10 <sup>-38</sup> |
| <i>EXOC3L</i>   | 2.02674  | 2.887332 | 1.43x10 <sup>-39</sup> | 2.89x10 <sup>-38</sup> |
| <i>FXYD1</i>    | 3.612762 | 3.279505 | 2.42x10 <sup>-39</sup> | 4.85x10 <sup>-38</sup> |
| <i>KRT13</i>    | -7.54652 | 8.567938 | 2.69x10 <sup>-39</sup> | 5.37x10 <sup>-38</sup> |
| <i>CABLES1</i>  | 2.098878 | 5.197368 | 2.92x10 <sup>-39</sup> | 5.83x10 <sup>-38</sup> |
| <i>SLC9A3R1</i> | -2.37976 | 6.905826 | 3.64x10 <sup>-39</sup> | 7.22x10 <sup>-38</sup> |
| <i>COX4I2</i>   | 2.97137  | 3.364962 | 3.96x10 <sup>-39</sup> | 7.87x10 <sup>-38</sup> |
| <i>CDKN2A</i>   | -4.4899  | 4.30212  | 4.33x10 <sup>-39</sup> | 8.58x10 <sup>-38</sup> |
| <i>LAMP3</i>    | 2.771494 | 8.618046 | 4.41x10 <sup>-39</sup> | 8.73x10 <sup>-38</sup> |
| <i>FAM107A</i>  | 4.639205 | 7.287642 | 4.70x10 <sup>-39</sup> | 9.28x10 <sup>-38</sup> |

|                 |          |          |                        |                        |
|-----------------|----------|----------|------------------------|------------------------|
| <i>SULT1A1</i>  | 2.26212  | 5.308711 | 5.06x10 <sup>-39</sup> | 9.98x10 <sup>-38</sup> |
| <i>BMP7</i>     | -3.87071 | 5.223011 | 5.30x10 <sup>-39</sup> | 1.04x10 <sup>-37</sup> |
| <i>HEPHL1</i>   | -8.33103 | 2.838049 | 6.17x10 <sup>-39</sup> | 1.21x10 <sup>-37</sup> |
| <i>AOC3</i>     | 3.073315 | 7.856166 | 8.95x10 <sup>-39</sup> | 1.74x10 <sup>-37</sup> |
| <i>ALDH3B1</i>  | 2.991767 | 6.618246 | 9.36x10 <sup>-39</sup> | 1.82x10 <sup>-37</sup> |
| <i>XDH</i>      | -4.37893 | 3.169111 | 1.18x10 <sup>-38</sup> | 2.29x10 <sup>-37</sup> |
| <i>GGTLC1</i>   | 4.999635 | 4.286582 | 2.14x10 <sup>-38</sup> | 4.10x10 <sup>-37</sup> |
| <i>IVL</i>      | -6.83213 | 4.944225 | 2.20x10 <sup>-38</sup> | 4.21x10 <sup>-37</sup> |
| <i>ABCB6</i>    | -2.15791 | 5.06248  | 2.50x10 <sup>-38</sup> | 4.79x10 <sup>-37</sup> |
| <i>CSRNPI</i>   | 2.905837 | 7.366649 | 2.60x10 <sup>-38</sup> | 4.96x10 <sup>-37</sup> |
| <i>EDARADD</i>  | -3.37868 | 4.141698 | 2.65x10 <sup>-38</sup> | 5.05x10 <sup>-37</sup> |
| <i>KIAA1462</i> | 2.418844 | 6.957585 | 2.80x10 <sup>-38</sup> | 5.33x10 <sup>-37</sup> |
| <i>SLC6A20</i>  | 4.013984 | 2.744678 | 3.28x10 <sup>-38</sup> | 6.21x10 <sup>-37</sup> |
| <i>GSDMC</i>    | -4.12439 | 3.077474 | 3.34x10 <sup>-38</sup> | 6.31x10 <sup>-37</sup> |
| <i>RAB37</i>    | 2.421446 | 3.06449  | 3.37x10 <sup>-38</sup> | 6.37x10 <sup>-37</sup> |
| <i>PID1</i>     | 2.37964  | 4.908735 | 3.40x10 <sup>-38</sup> | 6.41x10 <sup>-37</sup> |
| <i>MLLT11</i>   | -3.02144 | 4.029477 | 4.47x10 <sup>-38</sup> | 8.34x10 <sup>-37</sup> |
| <i>LILRA5</i>   | 2.732114 | 3.423377 | 5.42x10 <sup>-38</sup> | 1.01x10 <sup>-36</sup> |
| <i>IL3RA</i>    | 2.405165 | 4.393888 | 6.02x10 <sup>-38</sup> | 1.12x10 <sup>-36</sup> |
| <i>ACOX2</i>    | 2.548839 | 2.883637 | 6.10x10 <sup>-38</sup> | 1.13x10 <sup>-36</sup> |
| <i>TBX4</i>     | 3.073636 | 4.741426 | 7.67x10 <sup>-38</sup> | 1.41x10 <sup>-36</sup> |
| <i>MFAP4</i>    | 3.130903 | 8.579694 | 7.79x10 <sup>-38</sup> | 1.44x10 <sup>-36</sup> |
| <i>FGFR4</i>    | 3.211658 | 5.486127 | 7.85x10 <sup>-38</sup> | 1.45x10 <sup>-36</sup> |
| <i>B4GALT4</i>  | -2.16519 | 5.685699 | 8.89x10 <sup>-38</sup> | 1.63x10 <sup>-36</sup> |
| <i>SPN</i>      | 2.844123 | 5.837942 | 1.11x10 <sup>-37</sup> | 2.03x10 <sup>-36</sup> |
| <i>C7orf58</i>  | 2.666439 | 4.601106 | 1.35x10 <sup>-37</sup> | 2.44x10 <sup>-36</sup> |
| <i>COL22A1</i>  | -5.43211 | 2.733147 | 1.43x10 <sup>-37</sup> | 2.59x10 <sup>-36</sup> |
| <i>SLC19A3</i>  | 3.469794 | 3.692278 | 1.46x10 <sup>-37</sup> | 2.64x10 <sup>-36</sup> |
| <i>PLAC9</i>    | 3.244303 | 3.563042 | 1.49x10 <sup>-37</sup> | 2.70x10 <sup>-36</sup> |

|                 |          |          |                        |                        |
|-----------------|----------|----------|------------------------|------------------------|
| <i>GCLC</i>     | -3.17585 | 7.00967  | 1.51x10 <sup>-37</sup> | 2.72x10 <sup>-36</sup> |
| <i>CYBRD1</i>   | 2.050168 | 8.19665  | 1.57x10 <sup>-37</sup> | 2.82x10 <sup>-36</sup> |
| <i>FAM162B</i>  | 3.008036 | 2.619403 | 1.71x10 <sup>-37</sup> | 3.07x10 <sup>-36</sup> |
| <i>TSKU</i>     | -2.0956  | 6.17151  | 1.76x10 <sup>-37</sup> | 3.15x10 <sup>-36</sup> |
| <i>SPRR1B</i>   | -8.26242 | 6.953557 | 1.82x10 <sup>-37</sup> | 3.26x10 <sup>-36</sup> |
| <i>SLC9A3R2</i> | 2.150572 | 6.838304 | 1.93x10 <sup>-37</sup> | 3.45x10 <sup>-36</sup> |
| <i>PODXL2</i>   | -2.88008 | 4.363345 | 2.06x10 <sup>-37</sup> | 3.69x10 <sup>-36</sup> |
| <i>HSPA4L</i>   | -2.47739 | 3.632325 | 3.00x10 <sup>-37</sup> | 5.31x10 <sup>-36</sup> |
| <i>VANGL2</i>   | -2.40784 | 5.738916 | 3.29x10 <sup>-37</sup> | 5.82x10 <sup>-36</sup> |
| <i>SLC46A2</i>  | 3.779701 | 3.90677  | 3.49x10 <sup>-37</sup> | 6.16x10 <sup>-36</sup> |
| <i>MMP13</i>    | -8.42938 | 6.621535 | 3.74x10 <sup>-37</sup> | 6.61x10 <sup>-36</sup> |
| <i>TFAP2C</i>   | -2.32498 | 4.516151 | 3.78x10 <sup>-37</sup> | 6.67x10 <sup>-36</sup> |
| <i>MAGEA9B</i>  | -10.706  | 3.967784 | 3.82x10 <sup>-37</sup> | 6.73x10 <sup>-36</sup> |
| <i>DES</i>      | 4.269716 | 5.984833 | 3.87x10 <sup>-37</sup> | 6.81x10 <sup>-36</sup> |
| <i>ACOXL</i>    | 3.786769 | 2.500011 | 4.47x10 <sup>-37</sup> | 7.84x10 <sup>-36</sup> |
| <i>CENPP</i>    | -2.0817  | 2.523846 | 4.55x10 <sup>-37</sup> | 7.97x10 <sup>-36</sup> |
| <i>KL</i>       | 3.064953 | 3.257797 | 4.79x10 <sup>-37</sup> | 8.38x10 <sup>-36</sup> |
| <i>PLAU</i>     | -2.99842 | 7.392393 | 5.29x10 <sup>-37</sup> | 9.21x10 <sup>-36</sup> |
| <i>LRRC32</i>   | 2.650923 | 7.00053  | 5.63x10 <sup>-37</sup> | 9.79x10 <sup>-36</sup> |
| <i>MMP1</i>     | -5.71197 | 7.113599 | 5.73x10 <sup>-37</sup> | 9.95x10 <sup>-36</sup> |
| <i>GBP6</i>     | -5.42245 | 5.58499  | 6.16x10 <sup>-37</sup> | 1.07x10 <sup>-35</sup> |
| <i>GIMAP5</i>   | 2.430614 | 5.588265 | 7.26x10 <sup>-37</sup> | 1.26x10 <sup>-35</sup> |
| <i>PPP1R14A</i> | 2.591989 | 3.345016 | 7.98x10 <sup>-37</sup> | 1.38x10 <sup>-35</sup> |
| <i>SOX2</i>     | -4.86082 | 6.386808 | 9.40x10 <sup>-37</sup> | 1.62x10 <sup>-35</sup> |
| <i>KIAA0802</i> | -2.27511 | 3.927825 | 1.14x10 <sup>-36</sup> | 1.94x10 <sup>-35</sup> |
| <i>SCARF1</i>   | 2.123186 | 4.653176 | 1.26x10 <sup>-36</sup> | 2.15x10 <sup>-35</sup> |
| <i>ANXA3</i>    | 2.403363 | 6.763697 | 1.29x10 <sup>-36</sup> | 2.20x10 <sup>-35</sup> |
| <i>SCN7A</i>    | 4.076286 | 4.941312 | 1.31x10 <sup>-36</sup> | 2.22x10 <sup>-35</sup> |
| <i>Clorf106</i> | -2.14333 | 5.459557 | 1.32x10 <sup>-36</sup> | 2.25x10 <sup>-35</sup> |

|                  |          |          |                        |                        |
|------------------|----------|----------|------------------------|------------------------|
| <i>PLXNB3</i>    | -3.10194 | 3.695215 | 1.50x10 <sup>-36</sup> | 2.55x10 <sup>-35</sup> |
| <i>NINJ2</i>     | 2.276169 | 3.787802 | 1.58x10 <sup>-36</sup> | 2.67x10 <sup>-35</sup> |
| <i>GLIPR2</i>    | 2.248428 | 6.508795 | 1.84x10 <sup>-36</sup> | 3.11x10 <sup>-35</sup> |
| <i>C1orf116</i>  | 2.681433 | 7.545478 | 2.53x10 <sup>-36</sup> | 4.24x10 <sup>-35</sup> |
| <i>FBN2</i>      | -5.72117 | 5.361599 | 2.97x10 <sup>-36</sup> | 4.96x10 <sup>-35</sup> |
| <i>CYB5R2</i>    | -2.33517 | 4.224425 | 3.68x10 <sup>-36</sup> | 6.11x10 <sup>-35</sup> |
| <i>GIMAP7</i>    | 2.513717 | 4.787188 | 3.68x10 <sup>-36</sup> | 6.11x10 <sup>-35</sup> |
| <i>CD97</i>      | 2.188232 | 7.632688 | 4.07x10 <sup>-36</sup> | 6.75x10 <sup>-35</sup> |
| <i>C10orf99</i>  | -8.39576 | 2.783117 | 4.86x10 <sup>-36</sup> | 8.01x10 <sup>-35</sup> |
| <i>RGN</i>       | 3.04683  | 2.907874 | 4.88x10 <sup>-36</sup> | 8.03x10 <sup>-35</sup> |
| <i>PCDH19</i>    | -4.44334 | 3.518228 | 5.47x10 <sup>-36</sup> | 8.99x10 <sup>-35</sup> |
| <i>DOCK4</i>     | 2.047856 | 5.770379 | 5.62x10 <sup>-36</sup> | 9.22x10 <sup>-35</sup> |
| <i>COL11A1</i>   | -6.64888 | 6.03875  | 5.78x10 <sup>-36</sup> | 9.48x10 <sup>-35</sup> |
| <i>ATP8A1</i>    | 2.663401 | 5.490898 | 6.23x10 <sup>-36</sup> | 1.02x10 <sup>-34</sup> |
| <i>PI3</i>       | -6.78042 | 7.769124 | 6.26x10 <sup>-36</sup> | 1.02x10 <sup>-34</sup> |
| <i>RICH2</i>     | 2.762909 | 5.220046 | 7.01x10 <sup>-36</sup> | 1.14x10 <sup>-34</sup> |
| <i>KCNK3</i>     | 3.648575 | 4.870222 | 7.01x10 <sup>-36</sup> | 1.14x10 <sup>-34</sup> |
| <i>RGMA</i>      | -2.88557 | 4.742333 | 8.12x10 <sup>-36</sup> | 1.32x10 <sup>-34</sup> |
| <i>TSPAN12</i>   | 2.68561  | 5.694774 | 9.67x10 <sup>-36</sup> | 1.57x10 <sup>-34</sup> |
| <i>ST3GAL5</i>   | 2.084706 | 5.116847 | 1.17x10 <sup>-35</sup> | 1.89x10 <sup>-34</sup> |
| <i>CKMT1A</i>    | -4.32452 | 3.425992 | 1.18x10 <sup>-35</sup> | 1.91x10 <sup>-34</sup> |
| <i>PTPRZ1</i>    | -4.90446 | 5.745757 | 1.18x10 <sup>-35</sup> | 1.91x10 <sup>-34</sup> |
| <i>SPRR2D</i>    | -7.85639 | 6.26005  | 1.20x10 <sup>-35</sup> | 1.94x10 <sup>-34</sup> |
| <i>PRRX2</i>     | -3.13946 | 2.687792 | 1.36x10 <sup>-35</sup> | 2.19x10 <sup>-34</sup> |
| <i>VIPR1</i>     | 3.429834 | 6.050727 | 2.01x10 <sup>-35</sup> | 3.21x10 <sup>-34</sup> |
| <i>IGF2BP1</i>   | -6.86452 | 2.537299 | 2.39x10 <sup>-35</sup> | 3.79x10 <sup>-34</sup> |
| <i>DAPK2</i>     | 2.525342 | 5.061958 | 3.54x10 <sup>-35</sup> | 5.58x10 <sup>-34</sup> |
| <i>TMPRSS11D</i> | -8.33177 | 4.661766 | 4.00x10 <sup>-35</sup> | 6.29x10 <sup>-34</sup> |
| <i>SI00A7</i>    | -9.55029 | 6.016537 | 4.12x10 <sup>-35</sup> | 6.47x10 <sup>-34</sup> |

|                    |          |          |                        |                        |
|--------------------|----------|----------|------------------------|------------------------|
| <i>DENND3</i>      | 2.2867   | 6.420292 | 4.20x10 <sup>-35</sup> | 6.59x10 <sup>-34</sup> |
| <i>CIB2</i>        | -2.34959 | 3.030618 | 4.36x10 <sup>-35</sup> | 6.84x10 <sup>-34</sup> |
| <i>LGR4</i>        | -2.32013 | 5.058139 | 4.98x10 <sup>-35</sup> | 7.77x10 <sup>-34</sup> |
| <i>FAM83C</i>      | -8.10806 | 3.449581 | 5.53x10 <sup>-35</sup> | 8.62x10 <sup>-34</sup> |
| <i>KLK6</i>        | -8.40151 | 4.137066 | 5.62x10 <sup>-35</sup> | 8.76x10 <sup>-34</sup> |
| <i>ODZ2</i>        | -5.55413 | 5.439766 | 6.65x10 <sup>-35</sup> | 1.03x10 <sup>-33</sup> |
| <i>LOC728554</i>   | -2.67203 | 4.017348 | 6.91x10 <sup>-35</sup> | 1.07x10 <sup>-33</sup> |
| <i>CYYR1</i>       | 2.225532 | 5.086258 | 9.20x10 <sup>-35</sup> | 1.41x10 <sup>-33</sup> |
| <i>C1orf162</i>    | 2.445954 | 5.085822 | 9.72x10 <sup>-35</sup> | 1.49x10 <sup>-33</sup> |
| <i>CIQTNF6</i>     | -2.63097 | 4.923668 | 1.03x10 <sup>-34</sup> | 1.57x10 <sup>-33</sup> |
| <i>PKNOX2</i>      | 2.571074 | 3.540826 | 1.09x10 <sup>-34</sup> | 1.66x10 <sup>-33</sup> |
| <i>MAGEA4</i>      | -9.41267 | 5.660437 | 1.17x10 <sup>-34</sup> | 1.77x10 <sup>-33</sup> |
| <i>ICAM2</i>       | 2.265039 | 5.445349 | 1.23x10 <sup>-34</sup> | 1.87x10 <sup>-33</sup> |
| <i>PLD1</i>        | -2.37924 | 5.676023 | 1.27x10 <sup>-34</sup> | 1.93x10 <sup>-33</sup> |
| <i>GPER</i>        | 2.739823 | 3.013426 | 1.47x10 <sup>-34</sup> | 2.21x10 <sup>-33</sup> |
| <i>TLR4</i>        | 2.110466 | 5.480282 | 1.55x10 <sup>-34</sup> | 2.33x10 <sup>-33</sup> |
| <i>TMEM40</i>      | -4.48753 | 3.227867 | 1.65x10 <sup>-34</sup> | 2.48x10 <sup>-33</sup> |
| <i>MMP3</i>        | -6.7683  | 3.344503 | 1.66x10 <sup>-34</sup> | 2.48x10 <sup>-33</sup> |
| <i>AKR1C2</i>      | -5.109   | 7.90274  | 2.02x10 <sup>-34</sup> | 3.01x10 <sup>-33</sup> |
| <i>A2ML1</i>       | -8.10591 | 5.650476 | 2.68x10 <sup>-34</sup> | 3.97x10 <sup>-33</sup> |
| <i>CRABP2</i>      | -4.0103  | 5.660857 | 2.86x10 <sup>-34</sup> | 4.23x10 <sup>-33</sup> |
| <i>FAM13C</i>      | 2.388153 | 3.310724 | 3.22x10 <sup>-34</sup> | 4.76x10 <sup>-33</sup> |
| <i>DLL4</i>        | 2.028341 | 4.974072 | 3.26x10 <sup>-34</sup> | 4.81x10 <sup>-33</sup> |
| <i>PALM2-AKAP2</i> | 2.300149 | 7.277244 | 3.30x10 <sup>-34</sup> | 4.86x10 <sup>-33</sup> |
| <i>TRPV2</i>       | 2.069615 | 5.848841 | 3.51x10 <sup>-34</sup> | 5.17x10 <sup>-33</sup> |
| <i>RASGRP4</i>     | 2.610787 | 2.953024 | 3.69x10 <sup>-34</sup> | 5.43x10 <sup>-33</sup> |
| <i>CACNA2D2</i>    | 4.12461  | 7.178436 | 4.66x10 <sup>-34</sup> | 6.83x10 <sup>-33</sup> |
| <i>HOXB9</i>       | -8.25341 | 2.949881 | 4.69x10 <sup>-34</sup> | 6.86x10 <sup>-33</sup> |
| <i>TPD52L1</i>     | -2.35381 | 5.474184 | 4.73x10 <sup>-34</sup> | 6.91x10 <sup>-33</sup> |

|                  |          |          |                        |                        |
|------------------|----------|----------|------------------------|------------------------|
| <i>ROR1</i>      | 2.735992 | 3.073283 | 5.01x10 <sup>-34</sup> | 7.31x10 <sup>-33</sup> |
| <i>SERPINB13</i> | -7.91678 | 5.977756 | 5.42x10 <sup>-34</sup> | 7.90x10 <sup>-33</sup> |
| <i>KRT31</i>     | -11.2841 | 4.076729 | 6.37x10 <sup>-34</sup> | 9.25x10 <sup>-33</sup> |
| <i>DLK2</i>      | -3.76757 | 2.585957 | 6.43x10 <sup>-34</sup> | 9.32x10 <sup>-33</sup> |
| <i>ARHGAP6</i>   | 2.7239   | 3.536016 | 6.55x10 <sup>-34</sup> | 9.48x10 <sup>-33</sup> |
| <i>FMO2</i>      | 3.187272 | 7.406122 | 7.09x10 <sup>-34</sup> | 1.02x10 <sup>-32</sup> |
| <i>ABCA9</i>     | 2.696404 | 2.852639 | 7.35x10 <sup>-34</sup> | 1.06x10 <sup>-32</sup> |
| <i>SGMS2</i>     | 2.530173 | 6.705608 | 7.72x10 <sup>-34</sup> | 1.11x10 <sup>-32</sup> |
| <i>WFDC1</i>     | 2.45498  | 3.283201 | 8.00x10 <sup>-34</sup> | 1.15x10 <sup>-32</sup> |
| <i>ANKRD13B</i>  | -2.43291 | 3.285459 | 8.05x10 <sup>-34</sup> | 1.16x10 <sup>-32</sup> |
| <i>SLC1A4</i>    | -2.26889 | 6.194512 | 8.21x10 <sup>-34</sup> | 1.18x10 <sup>-32</sup> |
| <i>AHNAK2</i>    | -3.20856 | 7.467376 | 9.04x10 <sup>-34</sup> | 1.29x10 <sup>-32</sup> |
| <i>C16orf74</i>  | -2.93644 | 2.502959 | 9.13x10 <sup>-34</sup> | 1.30x10 <sup>-32</sup> |
| <i>MRC1</i>      | 3.170623 | 7.735488 | 9.97x10 <sup>-34</sup> | 1.42x10 <sup>-32</sup> |
| <i>C11orf9</i>   | 3.257278 | 6.052824 | 1.08x10 <sup>-33</sup> | 1.53x10 <sup>-32</sup> |
| <i>HSPB7</i>     | 2.633257 | 3.162765 | 1.09x10 <sup>-33</sup> | 1.55x10 <sup>-32</sup> |
| <i>ZNF750</i>    | -3.1191  | 4.805722 | 1.30x10 <sup>-33</sup> | 1.85x10 <sup>-32</sup> |
| <i>FBXO27</i>    | -3.07275 | 4.548396 | 1.34x10 <sup>-33</sup> | 1.90x10 <sup>-32</sup> |
| <i>PLLP</i>      | 2.311239 | 5.469042 | 1.35x10 <sup>-33</sup> | 1.91x10 <sup>-32</sup> |
| <i>AOX1</i>      | 3.124186 | 4.286502 | 1.37x10 <sup>-33</sup> | 1.93x10 <sup>-32</sup> |
| <i>KLF2</i>      | 2.701242 | 5.58144  | 1.39x10 <sup>-33</sup> | 1.96x10 <sup>-32</sup> |
| <i>NECAB1</i>    | 2.820431 | 3.520395 | 1.77x10 <sup>-33</sup> | 2.48x10 <sup>-32</sup> |
| <i>RNASE7</i>    | -7.50499 | 3.055337 | 1.87x10 <sup>-33</sup> | 2.62x10 <sup>-32</sup> |
| <i>EGFL7</i>     | 2.073059 | 5.85793  | 2.24x10 <sup>-33</sup> | 3.11x10 <sup>-32</sup> |
| <i>UCHL1</i>     | -4.04563 | 5.719248 | 2.65x10 <sup>-33</sup> | 3.67x10 <sup>-32</sup> |
| <i>UGT1A6</i>    | -5.60346 | 5.718237 | 2.99x10 <sup>-33</sup> | 4.14x10 <sup>-32</sup> |
| <i>LY6D</i>      | -8.0456  | 6.46286  | 3.03x10 <sup>-33</sup> | 4.19x10 <sup>-32</sup> |
| <i>CDKL2</i>     | 2.739363 | 3.342054 | 3.09x10 <sup>-33</sup> | 4.26x10 <sup>-32</sup> |
| <i>PEAR1</i>     | 2.251367 | 4.238176 | 3.23x10 <sup>-33</sup> | 4.46x10 <sup>-32</sup> |



|                  |          |          |                        |                        |
|------------------|----------|----------|------------------------|------------------------|
| <i>MMP10</i>     | -6.94512 | 6.125542 | 3.34x10 <sup>-33</sup> | 4.60x10 <sup>-32</sup> |
| <i>MS4A15</i>    | 4.820392 | 5.249832 | 3.49x10 <sup>-33</sup> | 4.79x10 <sup>-32</sup> |
| <i>SOX21</i>     | -4.57149 | 3.152888 | 4.15x10 <sup>-33</sup> | 5.67x10 <sup>-32</sup> |
| <i>BOP1</i>      | -2.5693  | 4.324907 | 4.78x10 <sup>-33</sup> | 6.52x10 <sup>-32</sup> |
| <i>MMRN2</i>     | 2.165508 | 5.948845 | 6.17x10 <sup>-33</sup> | 8.39x10 <sup>-32</sup> |
| <i>KRT75</i>     | -8.67606 | 3.104378 | 6.82x10 <sup>-33</sup> | 9.27x10 <sup>-32</sup> |
| <i>CLDN5</i>     | 2.763982 | 6.372008 | 8.41x10 <sup>-33</sup> | 1.14x10 <sup>-31</sup> |
| <i>SPRR2A</i>    | -8.19772 | 6.98514  | 8.52x10 <sup>-33</sup> | 1.15x10 <sup>-31</sup> |
| <i>CTSH</i>      | 2.344129 | 9.183609 | 8.56x10 <sup>-33</sup> | 1.15x10 <sup>-31</sup> |
| <i>FAM189A2</i>  | 3.644064 | 5.121895 | 8.60x10 <sup>-33</sup> | 1.16x10 <sup>-31</sup> |
| <i>ADAMTS8</i>   | 4.318426 | 4.992287 | 1.11x10 <sup>-32</sup> | 1.48x10 <sup>-31</sup> |
| <i>CLCA2</i>     | -6.40298 | 7.64145  | 1.19x10 <sup>-32</sup> | 1.58x10 <sup>-31</sup> |
| <i>CITED2</i>    | 2.090398 | 7.212571 | 1.31x10 <sup>-32</sup> | 1.74x10 <sup>-31</sup> |
| <i>ITGB8</i>     | -2.50953 | 5.855148 | 1.38x10 <sup>-32</sup> | 1.83x10 <sup>-31</sup> |
| <i>FAM84A</i>    | -2.65067 | 5.101517 | 1.53x10 <sup>-32</sup> | 2.02x10 <sup>-31</sup> |
| <i>CCRL2</i>     | 2.247076 | 3.793014 | 1.64x10 <sup>-32</sup> | 2.16x10 <sup>-31</sup> |
| <i>FLT4</i>      | 2.124219 | 5.149516 | 1.68x10 <sup>-32</sup> | 2.21x10 <sup>-31</sup> |
| <i>STON2</i>     | -2.04683 | 4.493345 | 1.78x10 <sup>-32</sup> | 2.34x10 <sup>-31</sup> |
| <i>CELF2</i>     | 2.258844 | 6.556395 | 1.83x10 <sup>-32</sup> | 2.41x10 <sup>-31</sup> |
| <i>CSTA</i>      | -3.66744 | 6.895724 | 2.10x10 <sup>-32</sup> | 2.76x10 <sup>-31</sup> |
| <i>PMAIP1</i>    | -2.43294 | 4.560637 | 3.10x10 <sup>-32</sup> | 4.02x10 <sup>-31</sup> |
| <i>PDK4</i>      | 3.620566 | 6.89953  | 3.28x10 <sup>-32</sup> | 4.26x10 <sup>-31</sup> |
| <i>PLEKHH2</i>   | 2.345242 | 4.962442 | 3.70x10 <sup>-32</sup> | 4.79x10 <sup>-31</sup> |
| <i>RHOBTB2</i>   | 2.411879 | 7.081438 | 3.79x10 <sup>-32</sup> | 4.90x10 <sup>-31</sup> |
| <i>ESYT3</i>     | 2.646622 | 3.87411  | 5.02x10 <sup>-32</sup> | 6.44x10 <sup>-31</sup> |
| <i>PSPH</i>      | -2.25002 | 4.280926 | 5.35x10 <sup>-32</sup> | 6.86x10 <sup>-31</sup> |
| <i>TMPRSS11A</i> | -8.69864 | 3.762349 | 5.66x10 <sup>-32</sup> | 7.26x10 <sup>-31</sup> |
| <i>ILIF5</i>     | -7.63564 | 3.480786 | 5.75x10 <sup>-32</sup> | 7.36x10 <sup>-31</sup> |
| <i>CX3CR1</i>    | 3.049305 | 3.506409 | 5.77x10 <sup>-32</sup> | 7.39x10 <sup>-31</sup> |

|                 |          |          |                        |                        |
|-----------------|----------|----------|------------------------|------------------------|
| <i>SCARA5</i>   | 4.353821 | 4.16774  | 6.63x10 <sup>-32</sup> | 8.47x10 <sup>-31</sup> |
| <i>GMFG</i>     | 2.069765 | 5.267699 | 7.18x10 <sup>-32</sup> | 9.15x10 <sup>-31</sup> |
| <i>WNK2</i>     | -4.37387 | 4.805238 | 7.43x10 <sup>-32</sup> | 9.44x10 <sup>-31</sup> |
| <i>COL10A1</i>  | -4.06208 | 5.081155 | 9.55x10 <sup>-32</sup> | 1.21x10 <sup>-30</sup> |
| <i>DIO2</i>     | -3.55728 | 4.062464 | 1.06x10 <sup>-31</sup> | 1.34x10 <sup>-30</sup> |
| <i>CA4</i>      | 5.199955 | 4.416432 | 1.18x10 <sup>-31</sup> | 1.48x10 <sup>-30</sup> |
| <i>SERPINE2</i> | -2.47387 | 5.776204 | 1.36x10 <sup>-31</sup> | 1.71x10 <sup>-30</sup> |
| <i>KIF1A</i>    | -6.79798 | 4.246197 | 1.42x10 <sup>-31</sup> | 1.78x10 <sup>-30</sup> |
| <i>SFTA1P</i>   | 4.115904 | 4.792485 | 1.48x10 <sup>-31</sup> | 1.84x10 <sup>-30</sup> |
| <i>CALML5</i>   | -8.69231 | 4.621113 | 1.71x10 <sup>-31</sup> | 2.12x10 <sup>-30</sup> |
| <i>GATA6</i>    | 2.321841 | 4.851744 | 1.71x10 <sup>-31</sup> | 2.12x10 <sup>-30</sup> |
| <i>GDA</i>      | -5.31315 | 3.376506 | 1.73x10 <sup>-31</sup> | 2.15x10 <sup>-30</sup> |
| <i>FBP1</i>     | 2.972775 | 7.314933 | 1.78x10 <sup>-31</sup> | 2.21x10 <sup>-30</sup> |
| <i>MGLL</i>     | 2.089296 | 7.628559 | 1.79x10 <sup>-31</sup> | 2.21x10 <sup>-30</sup> |
| <i>AKAP2</i>    | 2.585215 | 7.224609 | 1.99x10 <sup>-31</sup> | 2.46x10 <sup>-30</sup> |
| <i>TNNC1</i>    | 4.722472 | 5.099524 | 2.06x10 <sup>-31</sup> | 2.54x10 <sup>-30</sup> |
| <i>SPRR2G</i>   | -8.21898 | 3.00769  | 2.24x10 <sup>-31</sup> | 2.76x10 <sup>-30</sup> |
| <i>SI00A7A</i>  | -9.2399  | 3.41199  | 2.27x10 <sup>-31</sup> | 2.80x10 <sup>-30</sup> |
| <i>RGS5</i>     | 2.127739 | 7.131531 | 2.62x10 <sup>-31</sup> | 3.22x10 <sup>-30</sup> |
| <i>AKR1B10</i>  | -7.99854 | 7.617442 | 2.98x10 <sup>-31</sup> | 3.65x10 <sup>-30</sup> |
| <i>NCCRPI</i>   | -4.79903 | 3.364297 | 3.14x10 <sup>-31</sup> | 3.84x10 <sup>-30</sup> |
| <i>GPA33</i>    | 4.353732 | 3.064195 | 3.31x10 <sup>-31</sup> | 4.04x10 <sup>-30</sup> |
| <i>CFD</i>      | 2.712259 | 5.908191 | 3.55x10 <sup>-31</sup> | 4.32x10 <sup>-30</sup> |
| <i>DYNC111</i>  | -3.34686 | 2.799662 | 3.73x10 <sup>-31</sup> | 4.53x10 <sup>-30</sup> |
| <i>SLC7A11</i>  | -3.90378 | 5.291374 | 4.15x10 <sup>-31</sup> | 5.03x10 <sup>-30</sup> |
| <i>SMAD6</i>    | 2.686661 | 4.408823 | 4.21x10 <sup>-31</sup> | 5.09x10 <sup>-30</sup> |
| <i>ADRB2</i>    | 2.689085 | 4.569583 | 4.23x10 <sup>-31</sup> | 5.12x10 <sup>-30</sup> |
| <i>CDHR1</i>    | -4.10806 | 3.091557 | 4.44x10 <sup>-31</sup> | 5.35x10 <sup>-30</sup> |
| <i>TUBB3</i>    | -3.0991  | 5.260813 | 5.20x10 <sup>-31</sup> | 6.25x10 <sup>-30</sup> |

|                 |          |          |                        |                        |
|-----------------|----------|----------|------------------------|------------------------|
| <i>GRASP</i>    | 2.433365 | 4.569165 | 5.38x10 <sup>-31</sup> | 6.46x10 <sup>-30</sup> |
| <i>CD52</i>     | 2.873108 | 6.794963 | 6.39x10 <sup>-31</sup> | 7.59x10 <sup>-30</sup> |
| <i>ITGA8</i>    | 3.261084 | 4.050668 | 6.50x10 <sup>-31</sup> | 7.72x10 <sup>-30</sup> |
| <i>ABCA8</i>    | 3.955584 | 5.11725  | 7.41x10 <sup>-31</sup> | 8.76x10 <sup>-30</sup> |
| <i>ENPP4</i>    | 2.09322  | 5.406268 | 8.06x10 <sup>-31</sup> | 9.50x10 <sup>-30</sup> |
| <i>RHBDL2</i>   | -2.71748 | 2.518879 | 9.48x10 <sup>-31</sup> | 1.11x10 <sup>-29</sup> |
| <i>CCL14</i>    | 3.539323 | 5.240959 | 9.81x10 <sup>-31</sup> | 1.15x10 <sup>-29</sup> |
| <i>AGER</i>     | 5.184729 | 9.956782 | 9.94x10 <sup>-31</sup> | 1.16x10 <sup>-29</sup> |
| <i>FCN3</i>     | 4.3993   | 6.861509 | 1.04x10 <sup>-30</sup> | 1.22x10 <sup>-29</sup> |
| <i>FMO5</i>     | 3.048595 | 4.415227 | 1.08x10 <sup>-30</sup> | 1.26x10 <sup>-29</sup> |
| <i>CA9</i>      | -6.66006 | 5.269014 | 1.17x10 <sup>-30</sup> | 1.36x10 <sup>-29</sup> |
| <i>PNPLA7</i>   | 2.270187 | 2.899391 | 1.19x10 <sup>-30</sup> | 1.38x10 <sup>-29</sup> |
| <i>SESN3</i>    | -2.55594 | 4.330129 | 1.35x10 <sup>-30</sup> | 1.57x10 <sup>-29</sup> |
| <i>CD55</i>     | 2.129007 | 8.41287  | 1.36x10 <sup>-30</sup> | 1.57x10 <sup>-29</sup> |
| <i>CST1</i>     | -7.43526 | 4.666741 | 1.64x10 <sup>-30</sup> | 1.89x10 <sup>-29</sup> |
| <i>CCDC85A</i>  | 2.842302 | 3.684065 | 1.67x10 <sup>-30</sup> | 1.92x10 <sup>-29</sup> |
| <i>SEMA4B</i>   | -2.18813 | 7.719967 | 1.74x10 <sup>-30</sup> | 1.99x10 <sup>-29</sup> |
| <i>SEMA3B</i>   | 2.836646 | 5.715042 | 1.80x10 <sup>-30</sup> | 2.06x10 <sup>-29</sup> |
| <i>TNFRSF18</i> | -3.28305 | 3.064008 | 1.87x10 <sup>-30</sup> | 2.14x10 <sup>-29</sup> |
| <i>DPEP2</i>    | 2.677623 | 3.651884 | 1.96x10 <sup>-30</sup> | 2.24x10 <sup>-29</sup> |
| <i>TRIM16L</i>  | -3.09305 | 4.696455 | 1.96x10 <sup>-30</sup> | 2.24x10 <sup>-29</sup> |
| <i>CLCA4</i>    | -7.01339 | 3.274565 | 2.24x10 <sup>-30</sup> | 2.55x10 <sup>-29</sup> |
| <i>CD300C</i>   | 2.445557 | 3.053175 | 2.29x10 <sup>-30</sup> | 2.60x10 <sup>-29</sup> |
| <i>FZD4</i>     | 2.028768 | 5.945218 | 2.38x10 <sup>-30</sup> | 2.70x10 <sup>-29</sup> |
| <i>SOX9</i>     | -2.4216  | 5.399081 | 2.40x10 <sup>-30</sup> | 2.72x10 <sup>-29</sup> |
| <i>MDK</i>      | -2.55175 | 7.078877 | 2.51x10 <sup>-30</sup> | 2.84x10 <sup>-29</sup> |
| <i>SOD3</i>     | 2.261183 | 5.793601 | 2.86x10 <sup>-30</sup> | 3.24x10 <sup>-29</sup> |
| <i>FGR</i>      | 2.244876 | 5.771696 | 2.95x10 <sup>-30</sup> | 3.33x10 <sup>-29</sup> |
| <i>SLC4A3</i>   | -2.51816 | 2.9007   | 2.96x10 <sup>-30</sup> | 3.34x10 <sup>-29</sup> |

|                |          |          |                        |                        |
|----------------|----------|----------|------------------------|------------------------|
| <i>SGCA</i>    | 2.963708 | 3.253148 | 2.98x10 <sup>-30</sup> | 3.37x10 <sup>-29</sup> |
| <i>SLC44A5</i> | -3.67608 | 2.708486 | 3.08x10 <sup>-30</sup> | 3.48x10 <sup>-29</sup> |
| <i>MS4A2</i>   | 2.822057 | 3.34533  | 3.67x10 <sup>-30</sup> | 4.11x10 <sup>-29</sup> |
| <i>NEDD9</i>   | 2.121994 | 8.048053 | 3.75x10 <sup>-30</sup> | 4.20x10 <sup>-29</sup> |
| <i>AMICA1</i>  | 2.517831 | 5.45391  | 4.44x10 <sup>-30</sup> | 4.96x10 <sup>-29</sup> |
| <i>RAB38</i>   | -2.46075 | 4.549394 | 4.56x10 <sup>-30</sup> | 5.09x10 <sup>-29</sup> |
| <i>LMOD1</i>   | 2.397371 | 5.433737 | 4.61x10 <sup>-30</sup> | 5.14x10 <sup>-29</sup> |
| <i>FCN1</i>    | 2.985103 | 4.439279 | 5.19x10 <sup>-30</sup> | 5.77x10 <sup>-29</sup> |
| <i>MSR1</i>    | 2.605548 | 7.374605 | 5.35x10 <sup>-30</sup> | 5.94x10 <sup>-29</sup> |
| <i>GNA14</i>   | 2.587457 | 3.086428 | 5.44x10 <sup>-30</sup> | 6.03x10 <sup>-29</sup> |
| <i>TMEM163</i> | 2.440478 | 4.301404 | 5.63x10 <sup>-30</sup> | 6.24x10 <sup>-29</sup> |
| <i>COLEC12</i> | 2.211936 | 6.295489 | 6.26x10 <sup>-30</sup> | 6.90x10 <sup>-29</sup> |
| <i>OGN</i>     | 3.873524 | 4.489428 | 7.03x10 <sup>-30</sup> | 7.73x10 <sup>-29</sup> |
| <i>CASS4</i>   | 2.640882 | 3.674778 | 8.03x10 <sup>-30</sup> | 8.80x10 <sup>-29</sup> |
| <i>MDF1</i>    | -2.08092 | 4.667886 | 8.33x10 <sup>-30</sup> | 9.13x10 <sup>-29</sup> |
| <i>SUSD4</i>   | -2.80606 | 4.436286 | 8.51x10 <sup>-30</sup> | 9.30x10 <sup>-29</sup> |
| <i>ALOX5</i>   | 2.42473  | 6.764884 | 9.68x10 <sup>-30</sup> | 1.06x10 <sup>-28</sup> |
| <i>LRRN3</i>   | 3.26136  | 2.956065 | 1.32x10 <sup>-29</sup> | 1.43x10 <sup>-28</sup> |
| <i>MS4A7</i>   | 2.461864 | 6.383386 | 1.41x10 <sup>-29</sup> | 1.53x10 <sup>-28</sup> |
| <i>CADMI</i>   | 2.375007 | 7.045028 | 1.58x10 <sup>-29</sup> | 1.70x10 <sup>-28</sup> |
| <i>MYCL1</i>   | -2.27973 | 4.48842  | 1.63x10 <sup>-29</sup> | 1.76x10 <sup>-28</sup> |
| <i>ABCA6</i>   | 2.40711  | 3.469273 | 1.66x10 <sup>-29</sup> | 1.79x10 <sup>-28</sup> |
| <i>ANKRD22</i> | -2.482   | 3.793115 | 1.72x10 <sup>-29</sup> | 1.85x10 <sup>-28</sup> |
| <i>BDH1</i>    | -2.26574 | 4.59901  | 1.80x10 <sup>-29</sup> | 1.93x10 <sup>-28</sup> |
| <i>HOXB13</i>  | -9.88299 | 2.938349 | 2.02x10 <sup>-29</sup> | 2.16x10 <sup>-28</sup> |
| <i>SPPI</i>    | -4.12614 | 8.757229 | 2.05x10 <sup>-29</sup> | 2.19x10 <sup>-28</sup> |
| <i>CTHRC1</i>  | -3.24847 | 5.653562 | 2.10x10 <sup>-29</sup> | 2.25x10 <sup>-28</sup> |
| <i>CLDN18</i>  | 5.344554 | 8.855471 | 2.24x10 <sup>-29</sup> | 2.39x10 <sup>-28</sup> |
| <i>C2</i>      | 2.034225 | 7.628255 | 3.16x10 <sup>-29</sup> | 3.34x10 <sup>-28</sup> |

|                |          |          |                        |                        |
|----------------|----------|----------|------------------------|------------------------|
| <i>PLOD2</i>   | -2.08483 | 6.48379  | 3.30x10 <sup>-29</sup> | 3.49x10 <sup>-28</sup> |
| <i>SIX4</i>    | -2.33614 | 3.717476 | 4.12x10 <sup>-29</sup> | 4.34x10 <sup>-28</sup> |
| <i>NCKAP5</i>  | 2.655396 | 4.988126 | 4.12x10 <sup>-29</sup> | 4.34x10 <sup>-28</sup> |
| <i>NR2F1</i>   | 2.073005 | 4.607473 | 4.36x10 <sup>-29</sup> | 4.58x10 <sup>-28</sup> |
| <i>CD33</i>    | 2.094517 | 3.299461 | 4.51x10 <sup>-29</sup> | 4.73x10 <sup>-28</sup> |
| <i>COCH</i>    | -4.04289 | 3.622735 | 5.72x10 <sup>-29</sup> | 5.98x10 <sup>-28</sup> |
| <i>ITGA9</i>   | 2.220143 | 3.911781 | 6.51x10 <sup>-29</sup> | 6.79x10 <sup>-28</sup> |
| <i>ITM2A</i>   | 2.268906 | 5.235232 | 7.10x10 <sup>-29</sup> | 7.38x10 <sup>-28</sup> |
| <i>DENND2A</i> | 2.272845 | 4.297817 | 7.60x10 <sup>-29</sup> | 7.88x10 <sup>-28</sup> |
| <i>TGFA</i>    | -2.23957 | 5.508221 | 8.50x10 <sup>-29</sup> | 8.78x10 <sup>-28</sup> |
| <i>GJA4</i>    | 2.017024 | 4.109165 | 9.94x10 <sup>-29</sup> | 1.02x10 <sup>-27</sup> |
| <i>HOXB7</i>   | -2.57232 | 3.14548  | 1.03x10 <sup>-28</sup> | 1.05x10 <sup>-27</sup> |
| <i>NEFL</i>    | -6.49113 | 4.346021 | 1.04x10 <sup>-28</sup> | 1.07x10 <sup>-27</sup> |
| <i>PNMA2</i>   | 2.269145 | 4.074206 | 1.06x10 <sup>-28</sup> | 1.08x10 <sup>-27</sup> |
| <i>FPR2</i>    | 3.341162 | 4.014411 | 1.28x10 <sup>-28</sup> | 1.31x10 <sup>-27</sup> |
| <i>SNAI2</i>   | -2.09586 | 5.140131 | 1.29x10 <sup>-28</sup> | 1.31x10 <sup>-27</sup> |
| <i>SPRR1A</i>  | -7.95515 | 6.414437 | 1.45x10 <sup>-28</sup> | 1.47x10 <sup>-27</sup> |
| <i>AATK</i>    | 2.695275 | 4.301243 | 1.58x10 <sup>-28</sup> | 1.60x10 <sup>-27</sup> |
| <i>NR5A2</i>   | 2.235178 | 2.568986 | 1.61x10 <sup>-28</sup> | 1.63x10 <sup>-27</sup> |
| <i>CD300LG</i> | 5.049084 | 3.102864 | 1.68x10 <sup>-28</sup> | 1.70x10 <sup>-27</sup> |
| <i>MAGEA6</i>  | -9.25304 | 3.717172 | 1.79x10 <sup>-28</sup> | 1.80x10 <sup>-27</sup> |
| <i>CD101</i>   | 2.313168 | 3.715291 | 1.95x10 <sup>-28</sup> | 1.97x10 <sup>-27</sup> |
| <i>GIMAP4</i>  | 2.008669 | 5.784473 | 2.12x10 <sup>-28</sup> | 2.13x10 <sup>-27</sup> |
| <i>SIRPB1</i>  | 2.158251 | 4.647959 | 2.22x10 <sup>-28</sup> | 2.23x10 <sup>-27</sup> |
| <i>IL1RL1</i>  | 4.448162 | 4.98289  | 2.26x10 <sup>-28</sup> | 2.27x10 <sup>-27</sup> |
| <i>OSCAR</i>   | 2.401268 | 4.871508 | 2.42x10 <sup>-28</sup> | 2.42x10 <sup>-27</sup> |
| <i>NRIP3</i>   | -2.08795 | 2.623766 | 2.57x10 <sup>-28</sup> | 2.57x10 <sup>-27</sup> |
| <i>SIX2</i>    | -4.40799 | 3.205907 | 2.61x10 <sup>-28</sup> | 2.60x10 <sup>-27</sup> |
| <i>PRDM16</i>  | 2.764764 | 3.604259 | 2.72x10 <sup>-28</sup> | 2.71x10 <sup>-27</sup> |

|                  |          |          |                        |                        |
|------------------|----------|----------|------------------------|------------------------|
| <i>LAMA1</i>     | -4.29033 | 4.521037 | 3.36x10 <sup>-28</sup> | 3.33x10 <sup>-27</sup> |
| <i>G RTP1</i>    | -2.53651 | 3.614239 | 3.79x10 <sup>-28</sup> | 3.74x10 <sup>-27</sup> |
| <i>ITGA6</i>     | -2.06707 | 8.322272 | 3.85x10 <sup>-28</sup> | 3.80x10 <sup>-27</sup> |
| <i>HBA1</i>      | 5.041437 | 6.773263 | 4.47x10 <sup>-28</sup> | 4.40x10 <sup>-27</sup> |
| <i>UPK3B</i>     | 3.979139 | 6.227469 | 4.66x10 <sup>-28</sup> | 4.58x10 <sup>-27</sup> |
| <i>HPGDS</i>     | 2.529144 | 2.674818 | 5.21x10 <sup>-28</sup> | 5.11x10 <sup>-27</sup> |
| <i>ACADL</i>     | 3.557684 | 3.465719 | 5.48x10 <sup>-28</sup> | 5.37x10 <sup>-27</sup> |
| <i>CNTN6</i>     | 4.942522 | 2.811398 | 5.71x10 <sup>-28</sup> | 5.59x10 <sup>-27</sup> |
| <i>LTB4R</i>     | -2.30194 | 4.517341 | 5.96x10 <sup>-28</sup> | 5.82x10 <sup>-27</sup> |
| <i>EYA2</i>      | -3.3685  | 4.785401 | 6.09x10 <sup>-28</sup> | 5.95x10 <sup>-27</sup> |
| <i>C19orf59</i>  | 4.276784 | 6.253058 | 6.56x10 <sup>-28</sup> | 6.38x10 <sup>-27</sup> |
| <i>MFAP2</i>     | -2.22582 | 5.498998 | 7.53x10 <sup>-28</sup> | 7.32x10 <sup>-27</sup> |
| <i>ITLN1</i>     | 8.140251 | 5.679202 | 9.09x10 <sup>-28</sup> | 8.79x10 <sup>-27</sup> |
| <i>LOC723809</i> | 4.146121 | 2.516998 | 9.66x10 <sup>-28</sup> | 9.31x10 <sup>-27</sup> |
| <i>SMOX</i>      | -2.09321 | 4.038609 | 9.68x10 <sup>-28</sup> | 9.33x10 <sup>-27</sup> |
| <i>CLDN1</i>     | -3.37424 | 8.737704 | 9.69x10 <sup>-28</sup> | 9.33x10 <sup>-27</sup> |
| <i>RASGRP2</i>   | 2.514406 | 3.412899 | 1.00x10 <sup>-27</sup> | 9.62x10 <sup>-27</sup> |
| <i>PAX9</i>      | -3.29623 | 3.541089 | 1.12x10 <sup>-27</sup> | 1.08x10 <sup>-26</sup> |
| <i>SELP</i>      | 2.888886 | 4.496954 | 1.16x10 <sup>-27</sup> | 1.11x10 <sup>-26</sup> |
| <i>ANGPT1</i>    | 2.594961 | 5.097823 | 1.19x10 <sup>-27</sup> | 1.14x10 <sup>-26</sup> |
| <i>ESPN</i>      | -3.28701 | 3.499804 | 1.50x10 <sup>-27</sup> | 1.43x10 <sup>-26</sup> |
| <i>IGFL1</i>     | -9.46532 | 4.014163 | 1.52x10 <sup>-27</sup> | 1.45x10 <sup>-26</sup> |
| <i>ULBP2</i>     | -2.659   | 3.025698 | 1.56x10 <sup>-27</sup> | 1.48x10 <sup>-26</sup> |
| <i>KRT10</i>     | -2.54384 | 5.564443 | 2.14x10 <sup>-27</sup> | 2.02x10 <sup>-26</sup> |
| <i>IL22RA1</i>   | -2.48273 | 2.517949 | 2.39x10 <sup>-27</sup> | 2.25x10 <sup>-26</sup> |
| <i>NRCAM</i>     | -2.75466 | 4.808397 | 2.44x10 <sup>-27</sup> | 2.29x10 <sup>-26</sup> |
| <i>AMTN</i>      | -9.7454  | 3.738497 | 2.58x10 <sup>-27</sup> | 2.43x10 <sup>-26</sup> |
| <i>TBX2</i>      | 2.025795 | 5.829264 | 2.84x10 <sup>-27</sup> | 2.66x10 <sup>-26</sup> |
| <i>TRPV4</i>     | -2.05053 | 4.331824 | 2.89x10 <sup>-27</sup> | 2.70x10 <sup>-26</sup> |

|                 |          |          |                        |                        |
|-----------------|----------|----------|------------------------|------------------------|
| <i>BTK</i>      | 2.083743 | 4.534658 | 3.90x10 <sup>-27</sup> | 3.61x10 <sup>-26</sup> |
| <i>FILIP1</i>   | 2.192606 | 4.135824 | 4.54x10 <sup>-27</sup> | 4.18x10 <sup>-26</sup> |
| <i>SIPR5</i>    | -2.55867 | 3.503816 | 4.56x10 <sup>-27</sup> | 4.20x10 <sup>-26</sup> |
| <i>CEL</i>      | -4.56878 | 3.578204 | 4.78x10 <sup>-27</sup> | 4.40x10 <sup>-26</sup> |
| <i>SVEP1</i>    | 2.202904 | 6.17894  | 4.90x10 <sup>-27</sup> | 4.50x10 <sup>-26</sup> |
| <i>ADRB1</i>    | 3.374196 | 3.886966 | 5.24x10 <sup>-27</sup> | 4.80x10 <sup>-26</sup> |
| <i>IGFBP3</i>   | -2.80099 | 8.413598 | 5.24x10 <sup>-27</sup> | 4.80x10 <sup>-26</sup> |
| <i>PTPRN2</i>   | 2.258405 | 3.918732 | 5.53x10 <sup>-27</sup> | 5.06x10 <sup>-26</sup> |
| <i>ADH1B</i>    | 4.584596 | 8.161172 | 5.71x10 <sup>-27</sup> | 5.21x10 <sup>-26</sup> |
| <i>EPHB2</i>    | -2.26034 | 4.652298 | 6.24x10 <sup>-27</sup> | 5.69x10 <sup>-26</sup> |
| <i>ZP3</i>      | -2.14274 | 3.128122 | 6.68x10 <sup>-27</sup> | 6.06x10 <sup>-26</sup> |
| <i>CSF3R</i>    | 2.384596 | 6.082781 | 6.79x10 <sup>-27</sup> | 6.16x10 <sup>-26</sup> |
| <i>ADM2</i>     | -2.53518 | 2.745198 | 6.96x10 <sup>-27</sup> | 6.30x10 <sup>-26</sup> |
| <i>LTB4R2</i>   | -2.25191 | 2.529327 | 7.02x10 <sup>-27</sup> | 6.35x10 <sup>-26</sup> |
| <i>RASGRF1</i>  | 3.477514 | 5.102632 | 7.04x10 <sup>-27</sup> | 6.36x10 <sup>-26</sup> |
| <i>CYP26A1</i>  | -6.37502 | 2.734085 | 7.55x10 <sup>-27</sup> | 6.82x10 <sup>-26</sup> |
| <i>VSIG4</i>    | 2.680805 | 7.184271 | 7.59x10 <sup>-27</sup> | 6.85x10 <sup>-26</sup> |
| <i>ABI3BP</i>   | 2.866583 | 6.544194 | 7.97x10 <sup>-27</sup> | 7.18x10 <sup>-26</sup> |
| <i>COL4A3</i>   | 3.708403 | 4.755041 | 8.11x10 <sup>-27</sup> | 7.29x10 <sup>-26</sup> |
| <i>IGFBP2</i>   | -3.03287 | 8.22275  | 8.84x10 <sup>-27</sup> | 7.95x10 <sup>-26</sup> |
| <i>LST1</i>     | 2.159442 | 4.412936 | 9.67x10 <sup>-27</sup> | 8.66x10 <sup>-26</sup> |
| <i>ARHGAP29</i> | 2.096908 | 6.340307 | 1.12x10 <sup>-26</sup> | 1.00x10 <sup>-25</sup> |
| <i>SPRR3</i>    | -8.13285 | 6.926051 | 1.20x10 <sup>-26</sup> | 1.07x10 <sup>-25</sup> |
| <i>CCDC141</i>  | 3.458231 | 2.719767 | 1.21x10 <sup>-26</sup> | 1.08x10 <sup>-25</sup> |
| <i>CA12</i>     | -3.35813 | 6.706184 | 1.22x10 <sup>-26</sup> | 1.09x10 <sup>-25</sup> |
| <i>NR3C2</i>    | 2.406697 | 4.234853 | 1.25x10 <sup>-26</sup> | 1.12x10 <sup>-25</sup> |
| <i>ZNF703</i>   | -2.09683 | 3.598292 | 1.36x10 <sup>-26</sup> | 1.20x10 <sup>-25</sup> |
| <i>SLC4A11</i>  | -2.57683 | 3.529181 | 1.36x10 <sup>-26</sup> | 1.21x10 <sup>-25</sup> |
| <i>CLEC12A</i>  | 2.518276 | 3.182333 | 1.53x10 <sup>-26</sup> | 1.35x10 <sup>-25</sup> |

|                   |          |          |                        |                        |
|-------------------|----------|----------|------------------------|------------------------|
| <i>CPB2</i>       | 5.111853 | 4.02153  | 1.57x10 <sup>-26</sup> | 1.39x10 <sup>-25</sup> |
| <i>PPAP2C</i>     | -2.24651 | 5.370235 | 1.61x10 <sup>-26</sup> | 1.42x10 <sup>-25</sup> |
| <i>ST6GALNAC5</i> | 2.20386  | 3.995827 | 1.91x10 <sup>-26</sup> | 1.67x10 <sup>-25</sup> |
| <i>NGEF</i>       | -3.34343 | 2.573436 | 1.96x10 <sup>-26</sup> | 1.72x10 <sup>-25</sup> |
| <i>COL4A6</i>     | -3.64642 | 4.665983 | 2.06x10 <sup>-26</sup> | 1.81x10 <sup>-25</sup> |
| <i>STEAP4</i>     | 3.16361  | 7.606158 | 2.16x10 <sup>-26</sup> | 1.89x10 <sup>-25</sup> |
| <i>GIMAP1</i>     | 2.143514 | 3.392654 | 2.19x10 <sup>-26</sup> | 1.91x10 <sup>-25</sup> |
| <i>RPL3L</i>      | -6.0832  | -2.61285 | 2.32x10 <sup>-26</sup> | 2.02x10 <sup>-25</sup> |
| <i>LRRK2</i>      | 3.214994 | 7.803835 | 2.44x10 <sup>-26</sup> | 2.12x10 <sup>-25</sup> |
| <i>PLA2G1B</i>    | 4.783924 | 3.08499  | 2.56x10 <sup>-26</sup> | 2.22x10 <sup>-25</sup> |
| <i>SSTR1</i>      | 3.636239 | 3.344624 | 2.90x10 <sup>-26</sup> | 2.51x10 <sup>-25</sup> |
| <i>SERPINB7</i>   | -5.08039 | 2.915585 | 3.07x10 <sup>-26</sup> | 2.65x10 <sup>-25</sup> |
| <i>SPRR2E</i>     | -7.88341 | 5.749141 | 3.09x10 <sup>-26</sup> | 2.67x10 <sup>-25</sup> |
| <i>EIF5A2</i>     | -2.08351 | 3.95946  | 3.18x10 <sup>-26</sup> | 2.74x10 <sup>-25</sup> |
| <i>SLC29A4</i>    | -2.43081 | 2.861267 | 3.33x10 <sup>-26</sup> | 2.87x10 <sup>-25</sup> |
| <i>ALOX5AP</i>    | 2.424772 | 6.642368 | 3.57x10 <sup>-26</sup> | 3.07x10 <sup>-25</sup> |
| <i>PRUNE2</i>     | 2.14421  | 3.739676 | 3.70x10 <sup>-26</sup> | 3.17x10 <sup>-25</sup> |
| <i>PREX2</i>      | 3.045014 | 2.620358 | 4.60x10 <sup>-26</sup> | 3.93x10 <sup>-25</sup> |
| <i>PDE2A</i>      | 2.41016  | 3.914909 | 5.05x10 <sup>-26</sup> | 4.30x10 <sup>-25</sup> |
| <i>SERPINB4</i>   | -6.42207 | 4.549882 | 5.29x10 <sup>-26</sup> | 4.49x10 <sup>-25</sup> |
| <i>ADAM12</i>     | -3.24279 | 5.169823 | 6.14x10 <sup>-26</sup> | 5.20x10 <sup>-25</sup> |
| <i>SIPR4</i>      | 2.335397 | 3.415032 | 6.22x10 <sup>-26</sup> | 5.26x10 <sup>-25</sup> |
| <i>CD300LF</i>    | 2.420378 | 4.108342 | 6.69x10 <sup>-26</sup> | 5.63x10 <sup>-25</sup> |
| <i>NRGN</i>       | 2.697003 | 5.384995 | 7.31x10 <sup>-26</sup> | 6.14x10 <sup>-25</sup> |
| <i>DOK2</i>       | 2.206563 | 5.144191 | 8.49x10 <sup>-26</sup> | 7.09x10 <sup>-25</sup> |
| <i>FAM167A</i>    | 2.507478 | 4.584212 | 8.67x10 <sup>-26</sup> | 7.24x10 <sup>-25</sup> |
| <i>FIGF</i>       | 4.209804 | 4.970308 | 8.77x10 <sup>-26</sup> | 7.32x10 <sup>-25</sup> |
| <i>MGP</i>        | 2.192034 | 8.176752 | 9.26x10 <sup>-26</sup> | 7.71x10 <sup>-25</sup> |
| <i>WNT7B</i>      | -2.09124 | 5.818688 | 9.45x10 <sup>-26</sup> | 7.86x10 <sup>-25</sup> |



|                 |          |          |                        |                        |
|-----------------|----------|----------|------------------------|------------------------|
| <i>MAGEA3</i>   | -9.21366 | 3.189832 | 1.03x10 <sup>-25</sup> | 8.54x10 <sup>-25</sup> |
| <i>TRIM7</i>    | -2.93047 | 2.880989 | 1.04x10 <sup>-25</sup> | 8.57x10 <sup>-25</sup> |
| <i>CYP27A1</i>  | 2.146728 | 6.957668 | 1.05x10 <sup>-25</sup> | 8.73x10 <sup>-25</sup> |
| <i>SPARCL1</i>  | 2.067567 | 9.009382 | 1.06x10 <sup>-25</sup> | 8.74x10 <sup>-25</sup> |
| <i>MNDA</i>     | 2.08309  | 5.064771 | 1.10x10 <sup>-25</sup> | 9.08x10 <sup>-25</sup> |
| <i>KRT19</i>    | -2.10433 | 9.816249 | 1.11x10 <sup>-25</sup> | 9.15x10 <sup>-25</sup> |
| <i>CACNA1D</i>  | 2.955423 | 3.26372  | 1.12x10 <sup>-25</sup> | 9.21x10 <sup>-25</sup> |
| <i>KIF26B</i>   | -2.63497 | 3.855494 | 1.16x10 <sup>-25</sup> | 9.52x10 <sup>-25</sup> |
| <i>ADAM23</i>   | -4.72094 | 4.916898 | 1.18x10 <sup>-25</sup> | 9.68x10 <sup>-25</sup> |
| <i>BTNL9</i>    | 3.466321 | 4.959543 | 1.20x10 <sup>-25</sup> | 9.83x10 <sup>-25</sup> |
| <i>EEF1A2</i>   | -4.89739 | 3.118557 | 1.25x10 <sup>-25</sup> | 1.03x10 <sup>-24</sup> |
| <i>STRA6</i>    | -3.95404 | 3.057888 | 1.37x10 <sup>-25</sup> | 1.12x10 <sup>-24</sup> |
| <i>PLCH2</i>    | -3.04197 | 3.873353 | 1.44x10 <sup>-25</sup> | 1.18x10 <sup>-24</sup> |
| <i>LRRC15</i>   | -3.48505 | 5.178055 | 1.80x10 <sup>-25</sup> | 1.46x10 <sup>-24</sup> |
| <i>PII6</i>     | 4.183205 | 2.589766 | 1.99x10 <sup>-25</sup> | 1.61x10 <sup>-24</sup> |
| <i>LRP8</i>     | -2.08956 | 3.981269 | 2.07x10 <sup>-25</sup> | 1.68x10 <sup>-24</sup> |
| <i>MAGEA5</i>   | -5.19041 | -2.86105 | 2.25x10 <sup>-25</sup> | 1.82x10 <sup>-24</sup> |
| <i>ABCA3</i>    | 3.294232 | 9.19789  | 2.35x10 <sup>-25</sup> | 1.90x10 <sup>-24</sup> |
| <i>FOLR1</i>    | 3.780332 | 6.938429 | 2.42x10 <sup>-25</sup> | 1.96x10 <sup>-24</sup> |
| <i>LONRF3</i>   | 2.72288  | 2.700601 | 3.39x10 <sup>-25</sup> | 2.72x10 <sup>-24</sup> |
| <i>PDE4C</i>    | 2.686129 | 2.70335  | 3.55x10 <sup>-25</sup> | 2.85x10 <sup>-24</sup> |
| <i>AFF3</i>     | 2.928951 | 4.19953  | 3.65x10 <sup>-25</sup> | 2.92x10 <sup>-24</sup> |
| <i>BASPI1</i>   | -2.06093 | 6.152867 | 3.68x10 <sup>-25</sup> | 2.95x10 <sup>-24</sup> |
| <i>AKR1C1</i>   | -4.18888 | 8.542837 | 4.25x10 <sup>-25</sup> | 3.39x10 <sup>-24</sup> |
| <i>MLPH</i>     | 2.726696 | 6.687546 | 4.38x10 <sup>-25</sup> | 3.49x10 <sup>-24</sup> |
| <i>PTGES</i>    | -2.64867 | 4.972827 | 4.42x10 <sup>-25</sup> | 3.53x10 <sup>-24</sup> |
| <i>C17orf91</i> | 2.010957 | 4.357281 | 4.88x10 <sup>-25</sup> | 3.88x10 <sup>-24</sup> |
| <i>STAC</i>     | 2.818966 | 4.027865 | 6.54x10 <sup>-25</sup> | 5.17x10 <sup>-24</sup> |
| <i>KAL1</i>     | 2.322816 | 6.711889 | 6.69x10 <sup>-25</sup> | 5.28x10 <sup>-24</sup> |

|                        |          |          |                        |                        |
|------------------------|----------|----------|------------------------|------------------------|
| <i>DUSP1</i>           | 2.348128 | 9.304717 | 7.72x10 <sup>-25</sup> | 6.07x10 <sup>-24</sup> |
| <i>LOC648691</i>       | -6.39944 | -2.79341 | 7.93x10 <sup>-25</sup> | 6.23x10 <sup>-24</sup> |
| <i>FUT2</i>            | -2.59759 | 3.368325 | 8.80x10 <sup>-25</sup> | 6.90x10 <sup>-24</sup> |
| <i>KLHL13</i>          | -2.52496 | 3.655127 | 8.85x10 <sup>-25</sup> | 6.93x10 <sup>-24</sup> |
| <i>PRAMI</i>           | 2.63059  | 3.576635 | 9.61x10 <sup>-25</sup> | 7.50x10 <sup>-24</sup> |
| <i>PLA2G4F</i>         | 2.542753 | 5.194942 | 9.98x10 <sup>-25</sup> | 7.78x10 <sup>-24</sup> |
| <i>POF1B</i>           | -3.33785 | 4.562571 | 1.17x10 <sup>-24</sup> | 9.12x10 <sup>-24</sup> |
| <i>KRTDAP</i>          | -8.41127 | 3.883752 | 1.33x10 <sup>-24</sup> | 1.03x10 <sup>-23</sup> |
| <i>VSIG2</i>           | 3.627072 | 4.889665 | 1.33x10 <sup>-24</sup> | 1.03x10 <sup>-23</sup> |
| <i>ILIF9</i>           | -7.06138 | 2.934637 | 1.38x10 <sup>-24</sup> | 1.07x10 <sup>-23</sup> |
| <i>GPD1</i>            | 4.114744 | 5.097945 | 1.63x10 <sup>-24</sup> | 1.25x10 <sup>-23</sup> |
| <i>PGR</i>             | 2.364801 | 2.573864 | 1.70x10 <sup>-24</sup> | 1.31x10 <sup>-23</sup> |
| <i>ATP6VIC2</i>        | -2.35716 | 2.732233 | 2.16x10 <sup>-24</sup> | 1.65x10 <sup>-23</sup> |
| <i>ITLN2</i>           | 4.408438 | 3.628887 | 2.30x10 <sup>-24</sup> | 1.76x10 <sup>-23</sup> |
| <i>ABLIM3</i>          | 2.06796  | 4.955475 | 2.59x10 <sup>-24</sup> | 1.97x10 <sup>-23</sup> |
| <i>KCNA3</i>           | 2.594081 | 3.070002 | 2.79x10 <sup>-24</sup> | 2.12x10 <sup>-23</sup> |
| <i>CD109</i>           | -2.00369 | 6.692094 | 2.95x10 <sup>-24</sup> | 2.24x10 <sup>-23</sup> |
| <i>HOPX</i>            | 2.582361 | 7.742939 | 3.16x10 <sup>-24</sup> | 2.39x10 <sup>-23</sup> |
| <i>HS6ST2</i>          | -2.85113 | 3.766116 | 3.68x10 <sup>-24</sup> | 2.78x10 <sup>-23</sup> |
| <i>TNFSF12-TNFSF13</i> | 2.103856 | 4.64567  | 4.00x10 <sup>-24</sup> | 3.01x10 <sup>-23</sup> |
| <i>PHYHD1</i>          | 2.091766 | 3.983521 | 4.12x10 <sup>-24</sup> | 3.10x10 <sup>-23</sup> |
| <i>SERPINB2</i>        | -4.84628 | 4.895288 | 4.46x10 <sup>-24</sup> | 3.35x10 <sup>-23</sup> |
| <i>CPM</i>             | 2.29099  | 7.268948 | 5.43x10 <sup>-24</sup> | 4.07x10 <sup>-23</sup> |
| <i>CYP2B7P1</i>        | 3.989939 | 6.344969 | 5.82x10 <sup>-24</sup> | 4.35x10 <sup>-23</sup> |
| <i>NIPAL4</i>          | -4.83632 | 3.627907 | 6.12x10 <sup>-24</sup> | 4.58x10 <sup>-23</sup> |
| <i>C7</i>              | 3.302092 | 7.920522 | 7.65x10 <sup>-24</sup> | 5.68x10 <sup>-23</sup> |
| <i>PANX2</i>           | -2.56976 | 3.425646 | 8.14x10 <sup>-24</sup> | 6.04x10 <sup>-23</sup> |
| <i>GREM1</i>           | -3.90662 | 5.69597  | 9.18x10 <sup>-24</sup> | 6.80x10 <sup>-23</sup> |
| <i>CXCL14</i>          | -3.9533  | 6.507669 | 9.92x10 <sup>-24</sup> | 7.32x10 <sup>-23</sup> |

|                  |          |          |                        |                        |
|------------------|----------|----------|------------------------|------------------------|
| <i>LRRN4</i>     | 3.640342 | 4.151254 | 1.09x10 <sup>-23</sup> | 8.01x10 <sup>-23</sup> |
| <i>PPP1R16B</i>  | 2.05741  | 4.725704 | 1.11x10 <sup>-23</sup> | 8.16x10 <sup>-23</sup> |
| <i>DSG1</i>      | -6.90091 | 3.798678 | 1.15x10 <sup>-23</sup> | 8.43x10 <sup>-23</sup> |
| <i>NDRG1</i>     | -2.10638 | 10.06687 | 1.16x10 <sup>-23</sup> | 8.53x10 <sup>-23</sup> |
| <i>SFN</i>       | -2.72391 | 8.843507 | 1.18x10 <sup>-23</sup> | 8.66x10 <sup>-23</sup> |
| <i>BANK1</i>     | 2.322549 | 3.752252 | 1.19x10 <sup>-23</sup> | 8.69x10 <sup>-23</sup> |
| <i>SLIT2</i>     | 2.072426 | 5.754508 | 1.24x10 <sup>-23</sup> | 9.07x10 <sup>-23</sup> |
| <i>PIGR</i>      | 3.579811 | 8.868873 | 1.24x10 <sup>-23</sup> | 9.07x10 <sup>-23</sup> |
| <i>FABP7</i>     | -9.94767 | 4.789108 | 1.41x10 <sup>-23</sup> | 1.03x10 <sup>-22</sup> |
| <i>FHOD3</i>     | -2.90021 | 4.318565 | 1.42x10 <sup>-23</sup> | 1.04x10 <sup>-22</sup> |
| <i>GADD45B</i>   | 2.359008 | 7.185865 | 1.59x10 <sup>-23</sup> | 1.16x10 <sup>-22</sup> |
| <i>PRG1</i>      | -5.09336 | -2.94481 | 1.81x10 <sup>-23</sup> | 1.31x10 <sup>-22</sup> |
| <i>Cl6orf89</i>  | 3.7778   | 6.925837 | 1.84x10 <sup>-23</sup> | 1.33x10 <sup>-22</sup> |
| <i>HHIP</i>      | 3.717222 | 4.807433 | 2.09x10 <sup>-23</sup> | 1.51x10 <sup>-22</sup> |
| <i>TLR8</i>      | 2.211304 | 3.927721 | 2.22x10 <sup>-23</sup> | 1.60x10 <sup>-22</sup> |
| <i>SYT7</i>      | -2.07163 | 3.916992 | 2.31x10 <sup>-23</sup> | 1.66x10 <sup>-22</sup> |
| <i>PNMA5</i>     | -8.29693 | 3.343904 | 2.55x10 <sup>-23</sup> | 1.83x10 <sup>-22</sup> |
| <i>CBR3</i>      | -2.35545 | 3.745891 | 2.70x10 <sup>-23</sup> | 1.93x10 <sup>-22</sup> |
| <i>SLC34A2</i>   | 3.565876 | 10.74175 | 2.96x10 <sup>-23</sup> | 2.11x10 <sup>-22</sup> |
| <i>SLC6A4</i>    | 5.045427 | 6.285097 | 3.04x10 <sup>-23</sup> | 2.16x10 <sup>-22</sup> |
| <i>NEGR1</i>     | 2.179147 | 3.197243 | 3.28x10 <sup>-23</sup> | 2.33x10 <sup>-22</sup> |
| <i>CAVI</i>      | 2.462342 | 9.614883 | 3.76x10 <sup>-23</sup> | 2.66x10 <sup>-22</sup> |
| <i>TNFRSF10C</i> | 2.059376 | 2.763599 | 4.30x10 <sup>-23</sup> | 3.03x10 <sup>-22</sup> |
| <i>FGFBP1</i>    | -3.34401 | 5.938371 | 4.63x10 <sup>-23</sup> | 3.25x10 <sup>-22</sup> |
| <i>CCDC68</i>    | 2.245944 | 3.801927 | 4.67x10 <sup>-23</sup> | 3.28x10 <sup>-22</sup> |
| <i>MARCO</i>     | 3.241039 | 7.715469 | 4.93x10 <sup>-23</sup> | 3.45x10 <sup>-22</sup> |
| <i>APLN</i>      | 2.642532 | 5.211691 | 5.03x10 <sup>-23</sup> | 3.52x10 <sup>-22</sup> |
| <i>C2CD4A</i>    | -3.702   | 3.180808 | 5.68x10 <sup>-23</sup> | 3.96x10 <sup>-22</sup> |
| <i>LOC730101</i> | -2.56474 | 3.66738  | 5.73x10 <sup>-23</sup> | 4.00x10 <sup>-22</sup> |

|                 |          |          |                        |                        |
|-----------------|----------|----------|------------------------|------------------------|
| <i>BMP8A</i>    | -2.20773 | 3.05402  | 6.36x10 <sup>-23</sup> | 4.42x10 <sup>-22</sup> |
| <i>LIPK</i>     | -6.37732 | -2.70623 | 6.51x10 <sup>-23</sup> | 4.53x10 <sup>-22</sup> |
| <i>EDN1</i>     | 2.248716 | 5.84952  | 6.56x10 <sup>-23</sup> | 4.56x10 <sup>-22</sup> |
| <i>FETUB</i>    | -9.36649 | 2.669743 | 6.71x10 <sup>-23</sup> | 4.66x10 <sup>-22</sup> |
| <i>PPIL6</i>    | 2.30054  | 2.824898 | 7.00x10 <sup>-23</sup> | 4.85x10 <sup>-22</sup> |
| <i>NTN4</i>     | 2.055368 | 6.586381 | 7.35x10 <sup>-23</sup> | 5.09x10 <sup>-22</sup> |
| <i>FPR1</i>     | 2.36557  | 5.32838  | 8.20x10 <sup>-23</sup> | 5.66x10 <sup>-22</sup> |
| <i>KIAA0408</i> | 4.743102 | 3.901186 | 9.44x10 <sup>-23</sup> | 6.51x10 <sup>-22</sup> |
| <i>GNG7</i>     | 2.02195  | 3.303338 | 9.50x10 <sup>-23</sup> | 6.54x10 <sup>-22</sup> |
| <i>RBP1</i>     | -2.51836 | 6.0397   | 9.85x10 <sup>-23</sup> | 6.78x10 <sup>-22</sup> |
| <i>ATP1A2</i>   | 3.388945 | 2.788723 | 1.03x10 <sup>-22</sup> | 7.07x10 <sup>-22</sup> |
| <i>RPTN</i>     | -8.78592 | 2.787525 | 1.05x10 <sup>-22</sup> | 7.21x10 <sup>-22</sup> |
| <i>CA3</i>      | 3.249665 | 2.874359 | 1.07x10 <sup>-22</sup> | 7.35x10 <sup>-22</sup> |
| <i>ANK2</i>     | 2.019627 | 4.085017 | 1.11x10 <sup>-22</sup> | 7.57x10 <sup>-22</sup> |
| <i>LYPD6B</i>   | -2.62415 | 2.562259 | 1.12x10 <sup>-22</sup> | 7.66x10 <sup>-22</sup> |
| <i>AQP4</i>     | 3.94346  | 8.279938 | 1.15x10 <sup>-22</sup> | 7.84x10 <sup>-22</sup> |
| <i>COL4A4</i>   | 2.68641  | 5.052335 | 1.22x10 <sup>-22</sup> | 8.31x10 <sup>-22</sup> |
| <i>NDUFA4L2</i> | -2.4072  | 6.681973 | 1.32x10 <sup>-22</sup> | 8.95x10 <sup>-22</sup> |
| <i>CYP4B1</i>   | 4.138746 | 8.169199 | 1.40x10 <sup>-22</sup> | 9.53x10 <sup>-22</sup> |
| <i>GKN2</i>     | 4.914013 | 4.646499 | 1.44x10 <sup>-22</sup> | 9.79x10 <sup>-22</sup> |
| <i>SBSN</i>     | -6.88009 | 4.931547 | 1.52x10 <sup>-22</sup> | 1.03x10 <sup>-21</sup> |
| <i>FZD10</i>    | -3.6275  | 3.90722  | 1.57x10 <sup>-22</sup> | 1.06x10 <sup>-21</sup> |
| <i>DNASE1L3</i> | 3.035319 | 3.714738 | 1.92x10 <sup>-22</sup> | 1.30x10 <sup>-21</sup> |
| <i>ADAMTSL3</i> | 2.66155  | 4.403881 | 2.13x10 <sup>-22</sup> | 1.43x10 <sup>-21</sup> |
| <i>KRT80</i>    | -2.28166 | 5.344485 | 2.42x10 <sup>-22</sup> | 1.62x10 <sup>-21</sup> |
| <i>GDF10</i>    | 3.65504  | 3.980027 | 2.78x10 <sup>-22</sup> | 1.87x10 <sup>-21</sup> |
| <i>KLK8</i>     | -6.31169 | 2.625813 | 2.98x10 <sup>-22</sup> | 1.99x10 <sup>-21</sup> |
| <i>LY86</i>     | 2.030645 | 3.933582 | 3.17x10 <sup>-22</sup> | 2.11x10 <sup>-21</sup> |
| <i>BMP5</i>     | 2.791438 | 3.125308 | 3.28x10 <sup>-22</sup> | 2.19x10 <sup>-21</sup> |

|                  |          |          |                        |                        |
|------------------|----------|----------|------------------------|------------------------|
| <i>ZFP36</i>     | 2.248011 | 9.46353  | 3.60x10 <sup>-22</sup> | 2.40x10 <sup>-21</sup> |
| <i>CRIP1</i>     | 2.126912 | 7.070641 | 4.01x10 <sup>-22</sup> | 2.66x10 <sup>-21</sup> |
| <i>C1orf68</i>   | -6.76984 | -2.54886 | 4.61x10 <sup>-22</sup> | 3.05x10 <sup>-21</sup> |
| <i>TMEM184A</i>  | -2.36178 | 4.129255 | 4.71x10 <sup>-22</sup> | 3.11x10 <sup>-21</sup> |
| <i>CYP2S1</i>    | -2.45127 | 6.186947 | 4.91x10 <sup>-22</sup> | 3.24x10 <sup>-21</sup> |
| <i>FAM184A</i>   | 2.476108 | 3.602019 | 5.10x10 <sup>-22</sup> | 3.36x10 <sup>-21</sup> |
| <i>KMO</i>       | 2.185625 | 2.99062  | 5.89x10 <sup>-22</sup> | 3.88x10 <sup>-21</sup> |
| <i>LOC149620</i> | 5.840191 | 2.84809  | 5.96x10 <sup>-22</sup> | 3.92x10 <sup>-21</sup> |
| <i>CHRD1</i>     | 3.09315  | 6.000346 | 6.21x10 <sup>-22</sup> | 4.08x10 <sup>-21</sup> |
| <i>ITGA10</i>    | 2.239013 | 2.591894 | 6.30x10 <sup>-22</sup> | 4.13x10 <sup>-21</sup> |
| <i>TMEM45A</i>   | -2.31087 | 5.573737 | 7.53x10 <sup>-22</sup> | 4.91x10 <sup>-21</sup> |
| <i>C10orf116</i> | 2.37778  | 6.464588 | 7.97x10 <sup>-22</sup> | 5.19x10 <sup>-21</sup> |
| <i>NXP3</i>      | 2.322459 | 3.062486 | 8.40x10 <sup>-22</sup> | 5.46x10 <sup>-21</sup> |
| <i>ZBTB16</i>    | 3.826241 | 3.668463 | 8.53x10 <sup>-22</sup> | 5.55x10 <sup>-21</sup> |
| <i>WSCD1</i>     | 2.705046 | 2.65609  | 8.56x10 <sup>-22</sup> | 5.56x10 <sup>-21</sup> |
| <i>BAI2</i>      | -2.62474 | 3.073121 | 8.62x10 <sup>-22</sup> | 5.59x10 <sup>-21</sup> |
| <i>SRXN1</i>     | -2.69007 | 7.461584 | 8.70x10 <sup>-22</sup> | 5.64x10 <sup>-21</sup> |
| <i>ARC</i>       | 3.138954 | 2.580157 | 8.77x10 <sup>-22</sup> | 5.68x10 <sup>-21</sup> |
| <i>MYBPC1</i>    | -9.39603 | 3.472081 | 9.06x10 <sup>-22</sup> | 5.86x10 <sup>-21</sup> |
| <i>LAMC2</i>     | -2.46729 | 9.125169 | 9.74x10 <sup>-22</sup> | 6.29x10 <sup>-21</sup> |
| <i>KIAA1683</i>  | 2.594589 | 3.730563 | 1.02x10 <sup>-21</sup> | 6.59x10 <sup>-21</sup> |
| <i>FABP4</i>     | 3.681555 | 6.118515 | 1.22x10 <sup>-21</sup> | 7.80x10 <sup>-21</sup> |
| <i>GVIN1</i>     | 2.129864 | 3.476423 | 1.35x10 <sup>-21</sup> | 8.62x10 <sup>-21</sup> |
| <i>CYP4F11</i>   | -5.30272 | 5.306907 | 1.35x10 <sup>-21</sup> | 8.62x10 <sup>-21</sup> |
| <i>COL5A2</i>    | -2.40785 | 8.002611 | 1.37x10 <sup>-21</sup> | 8.72x10 <sup>-21</sup> |
| <i>C6orf168</i>  | -2.24947 | 3.487323 | 1.38x10 <sup>-21</sup> | 8.77x10 <sup>-21</sup> |
| <i>PLEKHG4B</i>  | -2.61881 | 3.631287 | 1.58x10 <sup>-21</sup> | 1.00x10 <sup>-20</sup> |
| <i>KLF15</i>     | 2.294202 | 3.478692 | 1.61x10 <sup>-21</sup> | 1.02x10 <sup>-20</sup> |
| <i>HIST1H2BO</i> | -3.44001 | -2.63221 | 1.62x10 <sup>-21</sup> | 1.02x10 <sup>-20</sup> |

|                  |          |          |                        |                        |
|------------------|----------|----------|------------------------|------------------------|
| <i>VTCN1</i>     | -4.47765 | 4.199756 | 1.63x10 <sup>-21</sup> | 1.03x10 <sup>-20</sup> |
| <i>DEFB126</i>   | -5.39244 | -3.22293 | 1.72x10 <sup>-21</sup> | 1.09x10 <sup>-20</sup> |
| <i>FOXA2</i>     | 2.991587 | 4.432766 | 1.79x10 <sup>-21</sup> | 1.13x10 <sup>-20</sup> |
| <i>TPPP3</i>     | 2.561815 | 6.756104 | 2.02x10 <sup>-21</sup> | 1.27x10 <sup>-20</sup> |
| <i>MMP9</i>      | -2.92108 | 6.918695 | 2.20x10 <sup>-21</sup> | 1.38x10 <sup>-20</sup> |
| <i>DARC</i>      | 3.146311 | 5.63649  | 2.27x10 <sup>-21</sup> | 1.42x10 <sup>-20</sup> |
| <i>ATP13A4</i>   | 2.904481 | 5.359795 | 2.29x10 <sup>-21</sup> | 1.44x10 <sup>-20</sup> |
| <i>CAPN3</i>     | 2.095285 | 3.494219 | 2.30x10 <sup>-21</sup> | 1.44x10 <sup>-20</sup> |
| <i>ZNF385B</i>   | 3.083235 | 4.529362 | 2.32x10 <sup>-21</sup> | 1.45x10 <sup>-20</sup> |
| <i>FJX1</i>      | -2.10522 | 3.366722 | 2.41x10 <sup>-21</sup> | 1.51x10 <sup>-20</sup> |
| <i>CYP4F3</i>    | -4.94569 | 4.243995 | 2.43x10 <sup>-21</sup> | 1.52x10 <sup>-20</sup> |
| <i>SULF2</i>     | -2.09348 | 7.147299 | 2.78x10 <sup>-21</sup> | 1.73x10 <sup>-20</sup> |
| <i>LOC84740</i>  | -4.40748 | 3.112612 | 3.17x10 <sup>-21</sup> | 1.96x10 <sup>-20</sup> |
| <i>TPSAB1</i>    | 2.173613 | 6.085924 | 3.43x10 <sup>-21</sup> | 2.11x10 <sup>-20</sup> |
| <i>ICAM4</i>     | 2.886833 | 4.020682 | 3.50x10 <sup>-21</sup> | 2.16x10 <sup>-20</sup> |
| <i>NTS</i>       | -6.24088 | 7.393477 | 3.73x10 <sup>-21</sup> | 2.29x10 <sup>-20</sup> |
| <i>SLC11A1</i>   | 2.154904 | 6.202518 | 4.55x10 <sup>-21</sup> | 2.78x10 <sup>-20</sup> |
| <i>CD69</i>      | 2.282616 | 4.436878 | 4.57x10 <sup>-21</sup> | 2.79x10 <sup>-20</sup> |
| <i>ALPL</i>      | 2.389709 | 7.549539 | 4.62x10 <sup>-21</sup> | 2.82x10 <sup>-20</sup> |
| <i>LOC153328</i> | -4.92958 | -2.73417 | 4.93x10 <sup>-21</sup> | 3.00x10 <sup>-20</sup> |
| <i>COBL</i>      | 2.389649 | 5.337231 | 5.09x10 <sup>-21</sup> | 3.09x10 <sup>-20</sup> |
| <i>ALDH1A2</i>   | 2.95541  | 4.01313  | 5.66x10 <sup>-21</sup> | 3.43x10 <sup>-20</sup> |
| <i>NPTX2</i>     | -5.66732 | 5.794696 | 6.36x10 <sup>-21</sup> | 3.84x10 <sup>-20</sup> |
| <i>C13orf36</i>  | 4.474138 | 2.954025 | 6.47x10 <sup>-21</sup> | 3.91x10 <sup>-20</sup> |
| <i>LIFR</i>      | 2.106636 | 6.811365 | 6.65x10 <sup>-21</sup> | 4.01x10 <sup>-20</sup> |
| <i>WISP2</i>     | 2.66124  | 5.057695 | 6.73x10 <sup>-21</sup> | 4.06x10 <sup>-20</sup> |
| <i>DMRT2</i>     | -3.19394 | 2.759192 | 6.85x10 <sup>-21</sup> | 4.13x10 <sup>-20</sup> |
| <i>CFTR</i>      | 2.96527  | 4.60328  | 7.58x10 <sup>-21</sup> | 4.55x10 <sup>-20</sup> |
| <i>DPCR1</i>     | 3.770882 | 2.792686 | 7.95x10 <sup>-21</sup> | 4.77x10 <sup>-20</sup> |

|                 |          |          |                        |                        |
|-----------------|----------|----------|------------------------|------------------------|
| <i>LPAR3</i>    | -2.36714 | 2.629091 | 8.47x10 <sup>-21</sup> | 5.07x10 <sup>-20</sup> |
| <i>PEBP4</i>    | 4.228233 | 5.607485 | 9.03x10 <sup>-21</sup> | 5.40x10 <sup>-20</sup> |
| <i>SLC4A4</i>   | 2.597647 | 4.774582 | 1.01x10 <sup>-20</sup> | 6.01x10 <sup>-20</sup> |
| <i>SFTPD</i>    | 3.718121 | 8.851584 | 1.02x10 <sup>-20</sup> | 6.09x10 <sup>-20</sup> |
| <i>CHI3L2</i>   | 2.994428 | 5.582513 | 1.03x10 <sup>-20</sup> | 6.11x10 <sup>-20</sup> |
| <i>PADI3</i>    | -6.61717 | 3.542773 | 1.10x10 <sup>-20</sup> | 6.56x10 <sup>-20</sup> |
| <i>FGF19</i>    | -10.3221 | 3.159093 | 1.43x10 <sup>-20</sup> | 8.46x10 <sup>-20</sup> |
| <i>PCDHAC2</i>  | 2.309083 | 2.760994 | 1.53x10 <sup>-20</sup> | 8.99x10 <sup>-20</sup> |
| <i>SULF1</i>    | -2.4755  | 7.409789 | 1.53x10 <sup>-20</sup> | 9.01x10 <sup>-20</sup> |
| <i>DCDC2</i>    | 2.702303 | 2.816888 | 1.66x10 <sup>-20</sup> | 9.74x10 <sup>-20</sup> |
| <i>CAPN9</i>    | 3.378429 | 2.826683 | 1.81x10 <sup>-20</sup> | 1.06x10 <sup>-19</sup> |
| <i>TREMI</i>    | 2.401063 | 5.580202 | 1.88x10 <sup>-20</sup> | 1.10x10 <sup>-19</sup> |
| <i>SFTPC</i>    | 5.246129 | 13.46245 | 1.92x10 <sup>-20</sup> | 1.12x10 <sup>-19</sup> |
| <i>UNC93A</i>   | -6.10367 | -2.55233 | 2.30x10 <sup>-20</sup> | 1.33x10 <sup>-19</sup> |
| <i>VSIG10L</i>  | -2.89172 | 3.587135 | 2.43x10 <sup>-20</sup> | 1.41x10 <sup>-19</sup> |
| <i>STEAP1</i>   | -2.03836 | 3.926508 | 2.75x10 <sup>-20</sup> | 1.58x10 <sup>-19</sup> |
| <i>CPA3</i>     | 2.29476  | 5.783478 | 2.95x10 <sup>-20</sup> | 1.69x10 <sup>-19</sup> |
| <i>AQPEP</i>    | -6.32228 | 2.962148 | 3.14x10 <sup>-20</sup> | 1.80x10 <sup>-19</sup> |
| <i>CRTAC1</i>   | 3.109954 | 6.350125 | 3.28x10 <sup>-20</sup> | 1.88x10 <sup>-19</sup> |
| <i>UGT8</i>     | -2.78001 | 2.783842 | 3.53x10 <sup>-20</sup> | 2.02x10 <sup>-19</sup> |
| <i>GCLM</i>     | -2.15494 | 5.49557  | 3.86x10 <sup>-20</sup> | 2.20x10 <sup>-19</sup> |
| <i>MAMDC2</i>   | 2.815551 | 5.421635 | 5.11x10 <sup>-20</sup> | 2.89x10 <sup>-19</sup> |
| <i>NRARP</i>    | -2.10101 | 4.935192 | 5.47x10 <sup>-20</sup> | 3.09x10 <sup>-19</sup> |
| <i>TUBB2B</i>   | -3.80602 | 2.586356 | 1.09x10 <sup>-19</sup> | 6.01x10 <sup>-19</sup> |
| <i>ITGA11</i>   | -2.85753 | 4.915603 | 1.17x10 <sup>-19</sup> | 6.47x10 <sup>-19</sup> |
| <i>APOLD1</i>   | 2.059852 | 5.791817 | 1.20x10 <sup>-19</sup> | 6.63x10 <sup>-19</sup> |
| <i>SBK1</i>     | -2.27835 | 3.856278 | 1.26x10 <sup>-19</sup> | 6.96x10 <sup>-19</sup> |
| <i>MXRA5</i>    | -2.3308  | 7.75508  | 1.32x10 <sup>-19</sup> | 7.23x10 <sup>-19</sup> |
| <i>C10orf10</i> | 2.192123 | 8.233694 | 1.35x10 <sup>-19</sup> | 7.41x10 <sup>-19</sup> |

|                 |          |          |                        |                        |
|-----------------|----------|----------|------------------------|------------------------|
| <i>MAPK8IP2</i> | -2.29381 | 3.132721 | 1.36x10 <sup>-19</sup> | 7.48x10 <sup>-19</sup> |
| <i>KRT23</i>    | -3.98915 | 4.034002 | 1.83x10 <sup>-19</sup> | 9.97x10 <sup>-19</sup> |
| <i>RAB17</i>    | 2.169388 | 4.230228 | 1.88x10 <sup>-19</sup> | 1.02x10 <sup>-18</sup> |
| <i>CXCR1</i>    | 3.1548   | 2.912908 | 1.95x10 <sup>-19</sup> | 1.06x10 <sup>-18</sup> |
| <i>CPS1</i>     | -4.8038  | 4.933872 | 2.21x10 <sup>-19</sup> | 1.20x10 <sup>-18</sup> |
| <i>SLC16A9</i>  | -2.43054 | 3.072378 | 2.39x10 <sup>-19</sup> | 1.29x10 <sup>-18</sup> |
| <i>TMPRSS2</i>  | 2.418412 | 6.739238 | 2.41x10 <sup>-19</sup> | 1.30x10 <sup>-18</sup> |
| <i>3-Sep</i>    | -2.45174 | 3.062562 | 2.52x10 <sup>-19</sup> | 1.36x10 <sup>-18</sup> |
| <i>SERPINA1</i> | 2.318915 | 9.815844 | 2.74x10 <sup>-19</sup> | 1.48x10 <sup>-18</sup> |
| <i>SFTA3</i>    | 3.663933 | 6.444089 | 2.88x10 <sup>-19</sup> | 1.55x10 <sup>-18</sup> |
| <i>B3GNT3</i>   | -2.92531 | 3.286498 | 3.02x10 <sup>-19</sup> | 1.62x10 <sup>-18</sup> |
| <i>GPRIN2</i>   | 2.357028 | 5.07002  | 3.68x10 <sup>-19</sup> | 1.96x10 <sup>-18</sup> |
| <i>RORC</i>     | 2.597232 | 4.314337 | 3.78x10 <sup>-19</sup> | 2.01x10 <sup>-18</sup> |
| <i>ARSH</i>     | -4.65486 | -3.18046 | 4.47x10 <sup>-19</sup> | 2.37x10 <sup>-18</sup> |
| <i>C6orf15</i>  | -8.15056 | 3.295344 | 4.69x10 <sup>-19</sup> | 2.48x10 <sup>-18</sup> |
| <i>SLIT3</i>    | 2.271569 | 6.274334 | 4.77x10 <sup>-19</sup> | 2.52x10 <sup>-18</sup> |
| <i>SV2A</i>     | -2.14435 | 3.5062   | 5.46x10 <sup>-19</sup> | 2.87x10 <sup>-18</sup> |
| <i>SORBS2</i>   | 2.104584 | 4.707261 | 6.52x10 <sup>-19</sup> | 3.40x10 <sup>-18</sup> |
| <i>GGTLC2</i>   | 2.00422  | 2.677458 | 6.54x10 <sup>-19</sup> | 3.41x10 <sup>-18</sup> |
| <i>AG2</i>      | 2.432453 | 6.230966 | 7.29x10 <sup>-19</sup> | 3.79x10 <sup>-18</sup> |
| <i>NR4A1</i>    | 2.605463 | 8.60681  | 8.73x10 <sup>-19</sup> | 4.51x10 <sup>-18</sup> |
| <i>PTGR1</i>    | -2.11248 | 6.005652 | 9.42x10 <sup>-19</sup> | 4.85x10 <sup>-18</sup> |
| <i>VCX</i>      | -4.78613 | -2.92335 | 1.01x10 <sup>-18</sup> | 5.20x10 <sup>-18</sup> |
| <i>RASSF6</i>   | -2.33114 | 3.655461 | 1.11x10 <sup>-18</sup> | 5.70x10 <sup>-18</sup> |
| <i>SLCO4C1</i>  | 2.164177 | 4.40533  | 1.16x10 <sup>-18</sup> | 5.95x10 <sup>-18</sup> |
| <i>RTBDN</i>    | -4.62804 | -2.75011 | 1.16x10 <sup>-18</sup> | 5.96x10 <sup>-18</sup> |
| <i>RAB6B</i>    | -2.73411 | 5.151072 | 1.23x10 <sup>-18</sup> | 6.27x10 <sup>-18</sup> |
| <i>GRIA1</i>    | 3.554312 | 3.668205 | 1.32x10 <sup>-18</sup> | 6.70x10 <sup>-18</sup> |
| <i>GPRC5A</i>   | 2.314    | 8.790102 | 1.32x10 <sup>-18</sup> | 6.72x10 <sup>-18</sup> |



|                 |          |          |                        |                        |
|-----------------|----------|----------|------------------------|------------------------|
| <i>C6orf218</i> | -5.37446 | -2.92174 | 1.39x10 <sup>-18</sup> | 7.08x10 <sup>-18</sup> |
| <i>PIP5K1B</i>  | 2.288016 | 4.332463 | 1.51x10 <sup>-18</sup> | 7.65x10 <sup>-18</sup> |
| <i>SOST</i>     | -5.641   | 3.593046 | 1.75x10 <sup>-18</sup> | 8.84x10 <sup>-18</sup> |
| <i>SYT1</i>     | -2.36859 | 2.966582 | 1.79x10 <sup>-18</sup> | 9.01x10 <sup>-18</sup> |
| <i>THBS2</i>    | -2.51243 | 7.578953 | 1.81x10 <sup>-18</sup> | 9.15x10 <sup>-18</sup> |
| <i>AQP9</i>     | 2.01924  | 4.997952 | 2.04x10 <sup>-18</sup> | 1.03x10 <sup>-17</sup> |
| <i>CLIC3</i>    | 2.241413 | 4.91157  | 2.13x10 <sup>-18</sup> | 1.07x10 <sup>-17</sup> |
| <i>PCDH7</i>    | -2.29983 | 4.939558 | 2.17x10 <sup>-18</sup> | 1.09x10 <sup>-17</sup> |
| <i>ICAM1</i>    | 2.237409 | 9.445223 | 3.31x10 <sup>-18</sup> | 1.63x10 <sup>-17</sup> |
| <i>PCDP1</i>    | 3.004539 | 3.401792 | 4.00x10 <sup>-18</sup> | 1.97x10 <sup>-17</sup> |
| <i>CDHR3</i>    | 3.342073 | 4.27294  | 4.36x10 <sup>-18</sup> | 2.14x10 <sup>-17</sup> |
| <i>NKX2-1</i>   | 3.094458 | 5.892535 | 4.89x10 <sup>-18</sup> | 2.40x10 <sup>-17</sup> |
| <i>PODNL1</i>   | -2.16583 | 2.845112 | 5.06x10 <sup>-18</sup> | 2.48x10 <sup>-17</sup> |
| <i>SEMA3E</i>   | 2.989403 | 3.119948 | 5.23x10 <sup>-18</sup> | 2.56x10 <sup>-17</sup> |
| <i>FAP</i>      | -2.04034 | 4.540459 | 5.88x10 <sup>-18</sup> | 2.87x10 <sup>-17</sup> |
| <i>VNN2</i>     | 2.000856 | 3.131337 | 5.98x10 <sup>-18</sup> | 2.91x10 <sup>-17</sup> |
| <i>NAPSA</i>    | 3.61066  | 10.13067 | 6.14x10 <sup>-18</sup> | 2.99x10 <sup>-17</sup> |
| <i>FAM25B</i>   | -6.16497 | -2.83342 | 6.21x10 <sup>-18</sup> | 3.02x10 <sup>-17</sup> |
| <i>CYP24A1</i>  | -3.99212 | 3.260646 | 6.57x10 <sup>-18</sup> | 3.19x10 <sup>-17</sup> |
| <i>MACROD2</i>  | 2.360917 | 4.834667 | 7.20x10 <sup>-18</sup> | 3.49x10 <sup>-17</sup> |
| <i>SFTPA1</i>   | 4.059809 | 12.72736 | 7.47x10 <sup>-18</sup> | 3.61x10 <sup>-17</sup> |
| <i>TNNT1</i>    | -3.1445  | 3.541385 | 7.67x10 <sup>-18</sup> | 3.71x10 <sup>-17</sup> |
| <i>CHIA</i>     | 4.078266 | 3.021495 | 7.73x10 <sup>-18</sup> | 3.73x10 <sup>-17</sup> |
| <i>HK3</i>      | 2.041526 | 4.928551 | 7.76x10 <sup>-18</sup> | 3.75x10 <sup>-17</sup> |
| <i>CDO1</i>     | 2.626679 | 2.79746  | 8.03x10 <sup>-18</sup> | 3.88x10 <sup>-17</sup> |
| <i>F2RL3</i>    | 2.281839 | 3.565176 | 8.51x10 <sup>-18</sup> | 4.10x10 <sup>-17</sup> |
| <i>TNC</i>      | -2.23746 | 8.839133 | 9.27x10 <sup>-18</sup> | 4.46x10 <sup>-17</sup> |
| <i>C11orf93</i> | -2.62997 | 2.887415 | 1.09x10 <sup>-17</sup> | 5.22x10 <sup>-17</sup> |
| <i>SLC26A9</i>  | 2.811191 | 4.898422 | 1.36x10 <sup>-17</sup> | 6.45x10 <sup>-17</sup> |

|                |          |          |                        |                        |
|----------------|----------|----------|------------------------|------------------------|
| <i>CILP2</i>   | -2.86023 | 2.820523 | 1.41x10 <sup>-17</sup> | 6.70x10 <sup>-17</sup> |
| <i>PKP2</i>    | -2.47758 | 4.622475 | 1.46x10 <sup>-17</sup> | 6.90x10 <sup>-17</sup> |
| <i>KLHDC7B</i> | -2.69008 | 3.272169 | 1.54x10 <sup>-17</sup> | 7.30x10 <sup>-17</sup> |
| <i>MUCL1</i>   | -6.06879 | 2.574393 | 1.57x10 <sup>-17</sup> | 7.39x10 <sup>-17</sup> |
| <i>TCHHL1</i>  | -5.96675 | -2.86065 | 1.64x10 <sup>-17</sup> | 7.73x10 <sup>-17</sup> |
| <i>LOXL2</i>   | -2.10551 | 5.979292 | 1.65x10 <sup>-17</sup> | 7.77x10 <sup>-17</sup> |
| <i>CNTNAP5</i> | -6.27461 | -2.54287 | 1.69x10 <sup>-17</sup> | 7.95x10 <sup>-17</sup> |
| <i>LGI3</i>    | 3.154306 | 5.493771 | 1.73x10 <sup>-17</sup> | 8.12x10 <sup>-17</sup> |
| <i>FOLH1</i>   | -2.32152 | 2.727568 | 1.85x10 <sup>-17</sup> | 8.69x10 <sup>-17</sup> |
| <i>MRAP2</i>   | -3.20236 | 3.187352 | 1.98x10 <sup>-17</sup> | 9.27x10 <sup>-17</sup> |
| <i>DNAH17</i>  | -2.59378 | 3.516638 | 2.03x10 <sup>-17</sup> | 9.49x10 <sup>-17</sup> |
| <i>PRG4</i>    | 4.302874 | 5.965827 | 2.04x10 <sup>-17</sup> | 9.55x10 <sup>-17</sup> |
| <i>CXCR2</i>   | 2.472751 | 3.216407 | 2.07x10 <sup>-17</sup> | 9.70x10 <sup>-17</sup> |
| <i>TP73</i>    | -2.58214 | 3.532097 | 2.10x10 <sup>-17</sup> | 9.83x10 <sup>-17</sup> |
| <i>PGBD5</i>   | -2.17523 | 3.983543 | 2.14x10 <sup>-17</sup> | 9.98x10 <sup>-17</sup> |
| <i>KRT83</i>   | -5.17235 | -2.56836 | 2.21x10 <sup>-17</sup> | 1.03x10 <sup>-16</sup> |
| <i>HES6</i>    | -2.51293 | 3.198998 | 2.27x10 <sup>-17</sup> | 1.06x10 <sup>-16</sup> |
| <i>TMEM20</i>  | -2.05774 | 3.57249  | 2.28x10 <sup>-17</sup> | 1.06x10 <sup>-16</sup> |
| <i>DEFA4</i>   | 4.421535 | -3.111   | 2.44x10 <sup>-17</sup> | 1.13x10 <sup>-16</sup> |
| <i>CPAMD8</i>  | 2.470907 | 5.554573 | 2.90x10 <sup>-17</sup> | 1.34x10 <sup>-16</sup> |
| <i>EGFR</i>    | -2.1871  | 7.26955  | 3.28x10 <sup>-17</sup> | 1.51x10 <sup>-16</sup> |
| <i>Clorf88</i> | 2.749014 | 4.119736 | 3.51x10 <sup>-17</sup> | 1.61x10 <sup>-16</sup> |
| <i>ERBB4</i>   | 2.696003 | 2.601325 | 3.79x10 <sup>-17</sup> | 1.73x10 <sup>-16</sup> |
| <i>SCTR</i>    | 3.055731 | 3.453715 | 3.88x10 <sup>-17</sup> | 1.77x10 <sup>-16</sup> |
| <i>RETN</i>    | 3.85432  | 2.636515 | 4.25x10 <sup>-17</sup> | 1.94x10 <sup>-16</sup> |
| <i>C8orf4</i>  | 2.05167  | 7.753539 | 4.38x10 <sup>-17</sup> | 1.99x10 <sup>-16</sup> |
| <i>MUC1</i>    | 2.054526 | 8.765492 | 4.40x10 <sup>-17</sup> | 2.00x10 <sup>-16</sup> |
| <i>CPLX2</i>   | -6.70416 | 4.244191 | 4.46x10 <sup>-17</sup> | 2.03x10 <sup>-16</sup> |
| <i>DMP1</i>    | -3.39839 | -2.61161 | 4.87x10 <sup>-17</sup> | 2.21x10 <sup>-16</sup> |

|                 |          |          |                        |                        |
|-----------------|----------|----------|------------------------|------------------------|
| <i>C6orf97</i>  | 2.622235 | 3.59355  | 5.09x10 <sup>-17</sup> | 2.30x10 <sup>-16</sup> |
| <i>UPK1B</i>    | -5.66124 | 6.594805 | 5.36x10 <sup>-17</sup> | 2.42x10 <sup>-16</sup> |
| <i>WNT5A</i>    | -2.08475 | 6.102004 | 5.63x10 <sup>-17</sup> | 2.54x10 <sup>-16</sup> |
| <i>UPK3BL</i>   | -2.58819 | 4.499254 | 6.33x10 <sup>-17</sup> | 2.84x10 <sup>-16</sup> |
| <i>CXCL2</i>    | 3.30968  | 7.110785 | 7.73x10 <sup>-17</sup> | 3.46x10 <sup>-16</sup> |
| <i>LICAM</i>    | -3.29599 | 3.18522  | 8.33x10 <sup>-17</sup> | 3.71x10 <sup>-16</sup> |
| <i>FLRT3</i>    | 2.232971 | 6.309399 | 8.43x10 <sup>-17</sup> | 3.75x10 <sup>-16</sup> |
| <i>AIMIL</i>    | -2.56307 | 3.061851 | 8.46x10 <sup>-17</sup> | 3.77x10 <sup>-16</sup> |
| <i>ATOH7</i>    | -2.96082 | -2.69563 | 8.59x10 <sup>-17</sup> | 3.82x10 <sup>-16</sup> |
| <i>KNDC1</i>    | 2.724595 | 3.42735  | 8.75x10 <sup>-17</sup> | 3.89x10 <sup>-16</sup> |
| <i>H19</i>      | -4.21639 | 9.558575 | 8.96x10 <sup>-17</sup> | 3.98x10 <sup>-16</sup> |
| <i>SFTPA2</i>   | 3.852932 | 13.64844 | 9.13x10 <sup>-17</sup> | 4.05x10 <sup>-16</sup> |
| <i>F2RL2</i>    | -3.16494 | 2.581895 | 9.78x10 <sup>-17</sup> | 4.33x10 <sup>-16</sup> |
| <i>DKK4</i>     | -4.68395 | -2.56733 | 1.00x10 <sup>-16</sup> | 4.42x10 <sup>-16</sup> |
| <i>C20orf56</i> | 3.246053 | 3.844228 | 1.08x10 <sup>-16</sup> | 4.77x10 <sup>-16</sup> |
| <i>TFAP2B</i>   | -7.20013 | 2.869076 | 1.25x10 <sup>-16</sup> | 5.49x10 <sup>-16</sup> |
| <i>TMEM139</i>  | 2.726985 | 3.620589 | 1.27x10 <sup>-16</sup> | 5.55x10 <sup>-16</sup> |
| <i>SLC2A5</i>   | -2.35382 | 2.764414 | 1.36x10 <sup>-16</sup> | 5.95x10 <sup>-16</sup> |
| <i>COL6A6</i>   | 2.67109  | 5.017712 | 1.39x10 <sup>-16</sup> | 6.08x10 <sup>-16</sup> |
| <i>SCN4B</i>    | 2.027966 | 4.629666 | 1.40x10 <sup>-16</sup> | 6.11x10 <sup>-16</sup> |
| <i>TPSB2</i>    | 2.091324 | 6.75708  | 1.53x10 <sup>-16</sup> | 6.67x10 <sup>-16</sup> |
| <i>C5orf13</i>  | -2.07622 | 6.50787  | 1.64x10 <sup>-16</sup> | 7.13x10 <sup>-16</sup> |
| <i>ADH7</i>     | -5.35283 | 5.689824 | 1.75x10 <sup>-16</sup> | 7.59x10 <sup>-16</sup> |
| <i>SFTA2</i>    | 3.69415  | 6.045077 | 1.88x10 <sup>-16</sup> | 8.13x10 <sup>-16</sup> |
| <i>FABP3</i>    | 2.12961  | 4.03919  | 2.10x10 <sup>-16</sup> | 9.02x10 <sup>-16</sup> |
| <i>HPGD</i>     | 2.340036 | 6.496358 | 2.10x10 <sup>-16</sup> | 9.05x10 <sup>-16</sup> |
| <i>LCE3A</i>    | -6.65175 | -2.74106 | 2.13x10 <sup>-16</sup> | 9.16x10 <sup>-16</sup> |
| <i>ITIH5</i>    | 2.366979 | 5.641035 | 2.22x10 <sup>-16</sup> | 9.52x10 <sup>-16</sup> |
| <i>C4orf26</i>  | -4.21455 | -2.59135 | 2.45x10 <sup>-16</sup> | 1.05x10 <sup>-15</sup> |

|                  |          |          |                        |                        |
|------------------|----------|----------|------------------------|------------------------|
| <i>ANKRD1</i>    | 3.972275 | 5.601191 | 2.64x10 <sup>-16</sup> | 1.12x10 <sup>-15</sup> |
| <i>GBX2</i>      | -3.5461  | -2.57138 | 2.67x10 <sup>-16</sup> | 1.14x10 <sup>-15</sup> |
| <i>UGT1A10</i>   | -8.85831 | 4.245251 | 3.51x10 <sup>-16</sup> | 1.49x10 <sup>-15</sup> |
| <i>RND2</i>      | -2.28338 | 2.606019 | 3.81x10 <sup>-16</sup> | 1.61x10 <sup>-15</sup> |
| <i>LHX1</i>      | -6.61827 | -2.74403 | 4.13x10 <sup>-16</sup> | 1.74x10 <sup>-15</sup> |
| <i>TGM3</i>      | -4.58384 | 3.656012 | 4.58x10 <sup>-16</sup> | 1.92x10 <sup>-15</sup> |
| <i>ACRV1</i>     | -2.97083 | -3.2039  | 4.70x10 <sup>-16</sup> | 1.97x10 <sup>-15</sup> |
| <i>C4BPA</i>     | 3.461414 | 7.622151 | 4.70x10 <sup>-16</sup> | 1.97x10 <sup>-15</sup> |
| <i>MT1A</i>      | 3.680069 | 2.688732 | 5.16x10 <sup>-16</sup> | 2.16x10 <sup>-15</sup> |
| <i>PGC</i>       | 4.069448 | 7.95602  | 5.44x10 <sup>-16</sup> | 2.27x10 <sup>-15</sup> |
| <i>AKRIC3</i>    | -2.90653 | 7.488603 | 5.68x10 <sup>-16</sup> | 2.36x10 <sup>-15</sup> |
| <i>WISPI</i>     | -2.21535 | 3.616071 | 5.73x10 <sup>-16</sup> | 2.38x10 <sup>-15</sup> |
| <i>NQO1</i>      | -2.16686 | 6.804768 | 7.70x10 <sup>-16</sup> | 3.18x10 <sup>-15</sup> |
| <i>SERPINA12</i> | -5.85269 | -3.08278 | 7.80x10 <sup>-16</sup> | 3.22x10 <sup>-15</sup> |
| <i>COL29A1</i>   | 2.289839 | 3.360082 | 7.94x10 <sup>-16</sup> | 3.27x10 <sup>-15</sup> |
| <i>PRR15L</i>    | 2.173339 | 4.259955 | 8.96x10 <sup>-16</sup> | 3.68x10 <sup>-15</sup> |
| <i>TAF7L</i>     | -2.95268 | -2.67416 | 1.03x10 <sup>-15</sup> | 4.22x10 <sup>-15</sup> |
| <i>CGB</i>       | -3.73465 | -2.86812 | 1.10x10 <sup>-15</sup> | 4.51x10 <sup>-15</sup> |
| <i>SERPINB3</i>  | -4.56707 | 6.414013 | 1.35x10 <sup>-15</sup> | 5.51x10 <sup>-15</sup> |
| <i>WDR78</i>     | 2.385111 | 2.869048 | 1.44x10 <sup>-15</sup> | 5.84x10 <sup>-15</sup> |
| <i>PRB2</i>      | -6.04006 | -2.53139 | 1.48x10 <sup>-15</sup> | 6.00x10 <sup>-15</sup> |
| <i>NLRP10</i>    | -4.11594 | -3.02297 | 1.52x10 <sup>-15</sup> | 6.16x10 <sup>-15</sup> |
| <i>SPOCK2</i>    | 2.374335 | 8.524982 | 2.09x10 <sup>-15</sup> | 8.37x10 <sup>-15</sup> |
| <i>SLCO2A1</i>   | 2.165885 | 7.174126 | 2.16x10 <sup>-15</sup> | 8.64x10 <sup>-15</sup> |
| <i>WNT10A</i>    | -2.36074 | 2.641865 | 2.19x10 <sup>-15</sup> | 8.76x10 <sup>-15</sup> |
| <i>RRAD</i>      | 2.649768 | 5.743891 | 2.48x10 <sup>-15</sup> | 9.90x10 <sup>-15</sup> |
| <i>LCE1F</i>     | -5.74107 | -3.43792 | 2.62x10 <sup>-15</sup> | 1.04x10 <sup>-14</sup> |
| <i>BPIL2</i>     | -4.95432 | -2.92013 | 2.63x10 <sup>-15</sup> | 1.05x10 <sup>-14</sup> |
| <i>NTRK2</i>     | -3.24607 | 7.733848 | 2.65x10 <sup>-15</sup> | 1.06x10 <sup>-14</sup> |

|                 |          |          |                        |                        |
|-----------------|----------|----------|------------------------|------------------------|
| <i>CLDN17</i>   | -5.57042 | -3.31194 | 2.87x10 <sup>-15</sup> | 1.14x10 <sup>-14</sup> |
| <i>GABRP</i>    | -3.32833 | 3.338143 | 3.40x10 <sup>-15</sup> | 1.34x10 <sup>-14</sup> |
| <i>AGR3</i>     | 3.005493 | 5.525725 | 3.43x10 <sup>-15</sup> | 1.36x10 <sup>-14</sup> |
| <i>SIX1</i>     | -2.28198 | 3.591166 | 3.95x10 <sup>-15</sup> | 1.55x10 <sup>-14</sup> |
| <i>CDH2</i>     | -2.90696 | 3.354357 | 4.26x10 <sup>-15</sup> | 1.67x10 <sup>-14</sup> |
| <i>OR7E5P</i>   | -5.57112 | -3.48877 | 4.30x10 <sup>-15</sup> | 1.69x10 <sup>-14</sup> |
| <i>SFTPB</i>    | 3.24348  | 12.99333 | 4.47x10 <sup>-15</sup> | 1.75x10 <sup>-14</sup> |
| <i>MGC14436</i> | -3.25787 | -2.74074 | 4.65x10 <sup>-15</sup> | 1.82x10 <sup>-14</sup> |
| <i>RAX</i>      | -5.86371 | -2.6038  | 5.70x10 <sup>-15</sup> | 2.21x10 <sup>-14</sup> |
| <i>SELV</i>     | -5.95103 | -3.27318 | 5.72x10 <sup>-15</sup> | 2.22x10 <sup>-14</sup> |
| <i>LRRC48</i>   | 2.531472 | 2.627768 | 7.74x10 <sup>-15</sup> | 2.98x10 <sup>-14</sup> |
| <i>RND1</i>     | 3.016246 | 5.97605  | 8.52x10 <sup>-15</sup> | 3.26x10 <sup>-14</sup> |
| <i>FOS</i>      | 2.125658 | 9.479845 | 8.98x10 <sup>-15</sup> | 3.43x10 <sup>-14</sup> |
| <i>LRRC14B</i>  | -3.87823 | -2.98964 | 1.04x10 <sup>-14</sup> | 3.96x10 <sup>-14</sup> |
| <i>CD36</i>     | 2.0915   | 6.875149 | 1.08x10 <sup>-14</sup> | 4.09x10 <sup>-14</sup> |
| <i>ADAMTS12</i> | -2.138   | 3.779177 | 1.09x10 <sup>-14</sup> | 4.15x10 <sup>-14</sup> |
| <i>NR4A3</i>    | 2.598023 | 5.690021 | 1.10x10 <sup>-14</sup> | 4.18x10 <sup>-14</sup> |
| <i>C6</i>       | 3.610387 | 2.735004 | 1.12x10 <sup>-14</sup> | 4.26x10 <sup>-14</sup> |
| <i>SLC44A4</i>  | 2.33883  | 5.499999 | 1.21x10 <sup>-14</sup> | 4.58x10 <sup>-14</sup> |
| <i>MT1M</i>     | 2.738938 | 4.229409 | 1.25x10 <sup>-14</sup> | 4.73x10 <sup>-14</sup> |
| <i>FNDC1</i>    | -2.47899 | 5.17955  | 1.30x10 <sup>-14</sup> | 4.90x10 <sup>-14</sup> |
| <i>ABCA4</i>    | -3.28699 | 3.16679  | 1.61x10 <sup>-14</sup> | 6.03x10 <sup>-14</sup> |
| <i>SYT16</i>    | -3.78284 | -2.62279 | 1.72x10 <sup>-14</sup> | 6.44x10 <sup>-14</sup> |
| <i>D4S234E</i>  | -2.52228 | 3.248946 | 1.79x10 <sup>-14</sup> | 6.70x10 <sup>-14</sup> |
| <i>NGFR</i>     | -2.46445 | 4.208831 | 2.30x10 <sup>-14</sup> | 8.53x10 <sup>-14</sup> |
| <i>HNFB1B</i>   | 3.031473 | 3.83935  | 2.39x10 <sup>-14</sup> | 8.85x10 <sup>-14</sup> |
| <i>FLJ36000</i> | -6.16445 | -2.69591 | 2.92x10 <sup>-14</sup> | 1.08x10 <sup>-13</sup> |
| <i>TGM6</i>     | -5.89537 | -3.30792 | 3.04x10 <sup>-14</sup> | 1.12x10 <sup>-13</sup> |
| <i>IL33</i>     | 2.042083 | 6.142442 | 3.08x10 <sup>-14</sup> | 1.13x10 <sup>-13</sup> |

|                  |          |          |                        |                        |
|------------------|----------|----------|------------------------|------------------------|
| <i>LCE1E</i>     | -5.0684  | -3.33736 | 3.52x10 <sup>-14</sup> | 1.29x10 <sup>-13</sup> |
| <i>SLCO1B1</i>   | -4.89508 | -3.0976  | 3.76x10 <sup>-14</sup> | 1.37x10 <sup>-13</sup> |
| <i>CARD17</i>    | -3.47428 | -2.80803 | 4.21x10 <sup>-14</sup> | 1.53x10 <sup>-13</sup> |
| <i>SI00A9</i>    | -2.81143 | 9.604109 | 4.34x10 <sup>-14</sup> | 1.58x10 <sup>-13</sup> |
| <i>CXCL17</i>    | 2.008208 | 7.074101 | 4.68x10 <sup>-14</sup> | 1.70x10 <sup>-13</sup> |
| <i>LOC146336</i> | -4.91048 | -2.56873 | 5.06x10 <sup>-14</sup> | 1.83x10 <sup>-13</sup> |
| <i>SMOC1</i>     | -2.78356 | 2.880905 | 5.76x10 <sup>-14</sup> | 2.08x10 <sup>-13</sup> |
| <i>BNC1</i>      | -3.64707 | 4.680754 | 6.58x10 <sup>-14</sup> | 2.36x10 <sup>-13</sup> |
| <i>POSTN</i>     | -2.1928  | 8.374949 | 8.18x10 <sup>-14</sup> | 2.92x10 <sup>-13</sup> |
| <i>CLDN10</i>    | -2.66106 | 2.637476 | 8.22x10 <sup>-14</sup> | 2.93x10 <sup>-13</sup> |
| <i>DLK1</i>      | -8.31446 | 4.088102 | 8.46x10 <sup>-14</sup> | 3.01x10 <sup>-13</sup> |
| <i>IL6</i>       | 2.88513  | 6.120753 | 8.58x10 <sup>-14</sup> | 3.06x10 <sup>-13</sup> |
| <i>RSPH4A</i>    | 2.820737 | 2.920792 | 9.58x10 <sup>-14</sup> | 3.40x10 <sup>-13</sup> |
| <i>PLA1A</i>     | 2.198091 | 3.582333 | 1.02x10 <sup>-13</sup> | 3.60x10 <sup>-13</sup> |
| <i>DNAH9</i>     | 3.198987 | 3.801799 | 1.06x10 <sup>-13</sup> | 3.74x10 <sup>-13</sup> |
| <i>PRDM9</i>     | -6.60296 | -2.90263 | 1.10x10 <sup>-13</sup> | 3.88x10 <sup>-13</sup> |
| <i>KRT1</i>      | -3.71286 | 3.609818 | 1.13x10 <sup>-13</sup> | 3.98x10 <sup>-13</sup> |
| <i>TMEM179</i>   | -5.08278 | -3.07653 | 1.15x10 <sup>-13</sup> | 4.06x10 <sup>-13</sup> |
| <i>FCGR3B</i>    | 2.376631 | 3.876778 | 1.79x10 <sup>-13</sup> | 6.21x10 <sup>-13</sup> |
| <i>GAGE12D</i>   | -11.3939 | 2.664282 | 1.94x10 <sup>-13</sup> | 6.69x10 <sup>-13</sup> |
| <i>CSF3</i>      | 3.855875 | 5.705303 | 1.94x10 <sup>-13</sup> | 6.70x10 <sup>-13</sup> |
| <i>LGR5</i>      | -2.96326 | 3.27762  | 2.00x10 <sup>-13</sup> | 6.89x10 <sup>-13</sup> |
| <i>ADD2</i>      | -2.45343 | 3.075362 | 2.98x10 <sup>-13</sup> | 1.02x10 <sup>-12</sup> |
| <i>Clorf130</i>  | 2.006186 | 3.412089 | 3.36x10 <sup>-13</sup> | 1.14x10 <sup>-12</sup> |
| <i>C10orf79</i>  | 3.009729 | 3.228731 | 3.53x10 <sup>-13</sup> | 1.20x10 <sup>-12</sup> |
| <i>PCDHA12</i>   | 2.635255 | 2.760181 | 3.61x10 <sup>-13</sup> | 1.22x10 <sup>-12</sup> |
| <i>UGT1A7</i>    | -8.25266 | 4.356593 | 3.87x10 <sup>-13</sup> | 1.31x10 <sup>-12</sup> |
| <i>DNAH10</i>    | 2.550911 | 3.079615 | 3.91x10 <sup>-13</sup> | 1.32x10 <sup>-12</sup> |
| <i>ABCBI</i>     | 2.051283 | 2.911952 | 3.92x10 <sup>-13</sup> | 1.33x10 <sup>-12</sup> |

|                 |          |          |                        |                        |
|-----------------|----------|----------|------------------------|------------------------|
| <i>OLRI</i>     | 2.173197 | 6.794985 | 4.04x10 <sup>-13</sup> | 1.36x10 <sup>-12</sup> |
| <i>SCUBE1</i>   | 2.973086 | 3.628922 | 4.33x10 <sup>-13</sup> | 1.46x10 <sup>-12</sup> |
| <i>HLA-DRB6</i> | 2.026931 | 5.759727 | 4.41x10 <sup>-13</sup> | 1.49x10 <sup>-12</sup> |
| <i>PRLR</i>     | -2.41656 | 3.343656 | 4.92x10 <sup>-13</sup> | 1.65x10 <sup>-12</sup> |
| <i>C2orf40</i>  | 2.978542 | 2.866153 | 5.34x10 <sup>-13</sup> | 1.78x10 <sup>-12</sup> |
| <i>COL9A2</i>   | -2.02343 | 4.052755 | 5.48x10 <sup>-13</sup> | 1.83x10 <sup>-12</sup> |
| <i>AGTR2</i>    | 3.466692 | 4.246275 | 5.92x10 <sup>-13</sup> | 1.97x10 <sup>-12</sup> |
| <i>SI00A8</i>   | -2.93214 | 8.539026 | 6.38x10 <sup>-13</sup> | 2.12x10 <sup>-12</sup> |
| <i>MIAT</i>     | -2.13986 | 4.788851 | 7.81x10 <sup>-13</sup> | 2.58x10 <sup>-12</sup> |
| <i>UBXN10</i>   | 2.070871 | 3.62577  | 9.24x10 <sup>-13</sup> | 3.03x10 <sup>-12</sup> |
| <i>FRG2B</i>    | -5.56235 | -3.48969 | 9.55x10 <sup>-13</sup> | 3.13x10 <sup>-12</sup> |
| <i>C17orf72</i> | 2.220078 | 3.089164 | 9.63x10 <sup>-13</sup> | 3.16x10 <sup>-12</sup> |
| <i>TM4SF19</i>  | -2.23193 | 2.605679 | 1.04x10 <sup>-12</sup> | 3.40x10 <sup>-12</sup> |
| <i>HYDIN</i>    | 2.319173 | 3.603138 | 1.07x10 <sup>-12</sup> | 3.49x10 <sup>-12</sup> |
| <i>CNR1</i>     | 2.099706 | 3.267502 | 1.22x10 <sup>-12</sup> | 3.98x10 <sup>-12</sup> |
| <i>ANKRD7</i>   | -2.66669 | -2.73622 | 1.27x10 <sup>-12</sup> | 4.12x10 <sup>-12</sup> |
| <i>CAPN8</i>    | 2.67999  | 3.426511 | 1.30x10 <sup>-12</sup> | 4.22x10 <sup>-12</sup> |
| <i>CYP2C18</i>  | -2.41544 | 2.682532 | 1.32x10 <sup>-12</sup> | 4.28x10 <sup>-12</sup> |
| <i>DKK2</i>     | 2.011479 | 3.533857 | 1.52x10 <sup>-12</sup> | 4.92x10 <sup>-12</sup> |
| <i>FAM57B</i>   | -3.012   | -2.58193 | 1.67x10 <sup>-12</sup> | 5.37x10 <sup>-12</sup> |
| <i>SCG2</i>     | -2.69482 | 2.838998 | 1.78x10 <sup>-12</sup> | 5.72x10 <sup>-12</sup> |
| <i>ROS1</i>     | 2.343136 | 6.183054 | 1.82x10 <sup>-12</sup> | 5.84x10 <sup>-12</sup> |
| <i>FMO1</i>     | -2.49881 | 2.879933 | 2.24x10 <sup>-12</sup> | 7.13x10 <sup>-12</sup> |
| <i>FOSB</i>     | 2.938837 | 9.287144 | 2.27x10 <sup>-12</sup> | 7.20x10 <sup>-12</sup> |
| <i>APOBEC1</i>  | -6.3316  | -3.1007  | 2.28x10 <sup>-12</sup> | 7.25x10 <sup>-12</sup> |
| <i>COL3A1</i>   | -2.22098 | 11.43825 | 2.38x10 <sup>-12</sup> | 7.57x10 <sup>-12</sup> |
| <i>BEST2</i>    | -3.88992 | -3.12929 | 2.44x10 <sup>-12</sup> | 7.73x10 <sup>-12</sup> |
| <i>SCEL</i>     | 2.258229 | 6.289671 | 2.75x10 <sup>-12</sup> | 8.70x10 <sup>-12</sup> |
| <i>C5orf49</i>  | 2.679212 | 2.63851  | 3.63x10 <sup>-12</sup> | 1.14x10 <sup>-11</sup> |

|                 |          |          |                        |                        |
|-----------------|----------|----------|------------------------|------------------------|
| <i>GSTM2</i>    | -2.19239 | 5.889987 | 3.81x10 <sup>-12</sup> | 1.19x10 <sup>-11</sup> |
| <i>CRYBA2</i>   | -4.51287 | -3.34446 | 4.04x10 <sup>-12</sup> | 1.26x10 <sup>-11</sup> |
| <i>PCDH20</i>   | 2.048199 | 3.22293  | 4.14x10 <sup>-12</sup> | 1.29x10 <sup>-11</sup> |
| <i>VWA3B</i>    | 3.367694 | 2.946038 | 4.30x10 <sup>-12</sup> | 1.34x10 <sup>-11</sup> |
| <i>C8B</i>      | 3.90155  | 2.654416 | 4.55x10 <sup>-12</sup> | 1.41x10 <sup>-11</sup> |
| <i>COL1A1</i>   | -2.35105 | 11.72858 | 4.87x10 <sup>-12</sup> | 1.51x10 <sup>-11</sup> |
| <i>CGB5</i>     | -3.71122 | -3.09186 | 5.08x10 <sup>-12</sup> | 1.57x10 <sup>-11</sup> |
| <i>TGIF2LX</i>  | -5.71624 | -3.41731 | 5.41x10 <sup>-12</sup> | 1.67x10 <sup>-11</sup> |
| <i>LRRC46</i>   | 2.577735 | 3.47662  | 5.47x10 <sup>-12</sup> | 1.68x10 <sup>-11</sup> |
| <i>ZMYND10</i>  | 2.897488 | 3.951794 | 6.29x10 <sup>-12</sup> | 1.93x10 <sup>-11</sup> |
| <i>ALDH3A1</i>  | -3.46361 | 7.666585 | 7.52x10 <sup>-12</sup> | 2.29x10 <sup>-11</sup> |
| <i>NTN3</i>     | -2.38847 | -2.57193 | 1.21x10 <sup>-11</sup> | 3.63x10 <sup>-11</sup> |
| <i>TRIM72</i>   | -3.91863 | -2.82346 | 1.23x10 <sup>-11</sup> | 3.69x10 <sup>-11</sup> |
| <i>SSTR5</i>    | -4.31092 | -2.88608 | 1.29x10 <sup>-11</sup> | 3.87x10 <sup>-11</sup> |
| <i>PLA2G2A</i>  | 3.201499 | 3.978015 | 1.35x10 <sup>-11</sup> | 4.03x10 <sup>-11</sup> |
| <i>ALDH1L1</i>  | -2.69805 | 2.703894 | 1.54x10 <sup>-11</sup> | 4.60x10 <sup>-11</sup> |
| <i>C13orf30</i> | 3.392487 | 3.791917 | 1.57x10 <sup>-11</sup> | 4.67x10 <sup>-11</sup> |
| <i>TRIM49</i>   | -5.38034 | -3.11543 | 1.86x10 <sup>-11</sup> | 5.49x10 <sup>-11</sup> |
| <i>MYB</i>      | -2.37113 | 4.227243 | 1.96x10 <sup>-11</sup> | 5.79x10 <sup>-11</sup> |
| <i>ADAMDECI</i> | -2.26389 | 3.036403 | 2.23x10 <sup>-11</sup> | 6.55x10 <sup>-11</sup> |
| <i>C9orf24</i>  | 2.869005 | 3.053403 | 2.23x10 <sup>-11</sup> | 6.56x10 <sup>-11</sup> |
| <i>RTP3</i>     | -4.6457  | -2.85003 | 2.48x10 <sup>-11</sup> | 7.26x10 <sup>-11</sup> |
| <i>C7orf52</i>  | -4.59626 | -3.25686 | 3.20x10 <sup>-11</sup> | 9.31x10 <sup>-11</sup> |
| <i>ESPNP</i>    | -3.31456 | -2.62994 | 3.34x10 <sup>-11</sup> | 9.69x10 <sup>-11</sup> |
| <i>CRYM</i>     | 2.319144 | 3.062838 | 4.30x10 <sup>-11</sup> | 1.23x10 <sup>-10</sup> |
| <i>TKTL1</i>    | -4.43371 | 2.997123 | 4.63x10 <sup>-11</sup> | 1.33x10 <sup>-10</sup> |
| <i>CXCL3</i>    | 2.407959 | 4.167395 | 4.68x10 <sup>-11</sup> | 1.34x10 <sup>-10</sup> |
| <i>TBX20</i>    | -3.89093 | -2.71331 | 5.11x10 <sup>-11</sup> | 1.46x10 <sup>-10</sup> |
| <i>REG1A</i>    | -4.1531  | -2.57326 | 5.19x10 <sup>-11</sup> | 1.48x10 <sup>-10</sup> |



|                  |          |          |                        |                        |
|------------------|----------|----------|------------------------|------------------------|
| <i>LMO3</i>      | 2.324903 | 6.101474 | 6.16x10 <sup>-11</sup> | 1.75x10 <sup>-10</sup> |
| <i>SCGB3A2</i>   | 2.711405 | 7.696977 | 6.89x10 <sup>-11</sup> | 1.95x10 <sup>-10</sup> |
| <i>LRRC55</i>    | -3.3741  | 2.772867 | 6.98x10 <sup>-11</sup> | 1.97x10 <sup>-10</sup> |
| <i>FAM75A2</i>   | -3.76395 | -3.27928 | 8.10x10 <sup>-11</sup> | 2.28x10 <sup>-10</sup> |
| <i>C19orf45</i>  | -2.32315 | -2.72601 | 8.16x10 <sup>-11</sup> | 2.29x10 <sup>-10</sup> |
| <i>LRFN2</i>     | -2.84655 | -2.5671  | 8.32x10 <sup>-11</sup> | 2.34x10 <sup>-10</sup> |
| <i>SLITRK1</i>   | -5.21057 | -2.60157 | 8.34x10 <sup>-11</sup> | 2.34x10 <sup>-10</sup> |
| <i>PRR4</i>      | -2.88652 | 3.136084 | 8.40x10 <sup>-11</sup> | 2.36x10 <sup>-10</sup> |
| <i>PTX3</i>      | 2.465945 | 3.686191 | 8.78x10 <sup>-11</sup> | 2.46x10 <sup>-10</sup> |
| <i>ALOX15B</i>   | 2.109899 | 6.216558 | 9.57x10 <sup>-11</sup> | 2.67x10 <sup>-10</sup> |
| <i>CXCL6</i>     | -2.96478 | 4.155983 | 1.05x10 <sup>-10</sup> | 2.92x10 <sup>-10</sup> |
| <i>SSX4</i>      | -4.8082  | -3.14984 | 1.07x10 <sup>-10</sup> | 2.99x10 <sup>-10</sup> |
| <i>KCNC1</i>     | -2.33556 | -2.61008 | 1.17x10 <sup>-10</sup> | 3.25x10 <sup>-10</sup> |
| <i>RBP4</i>      | 2.370588 | 4.049153 | 1.30x10 <sup>-10</sup> | 3.58x10 <sup>-10</sup> |
| <i>LRRC10B</i>   | 2.415744 | 2.604294 | 1.46x10 <sup>-10</sup> | 4.01x10 <sup>-10</sup> |
| <i>PRIMA1</i>    | -2.08962 | 2.606099 | 1.47x10 <sup>-10</sup> | 4.04x10 <sup>-10</sup> |
| <i>CADM3</i>     | 2.011515 | 2.977773 | 1.58x10 <sup>-10</sup> | 4.33x10 <sup>-10</sup> |
| <i>SPANXE</i>    | -6.53655 | -2.70635 | 1.59x10 <sup>-10</sup> | 4.37x10 <sup>-10</sup> |
| <i>MAGEB1</i>    | -6.8383  | -2.63841 | 1.76x10 <sup>-10</sup> | 4.82x10 <sup>-10</sup> |
| <i>CAPS</i>      | 2.318746 | 6.078246 | 1.83x10 <sup>-10</sup> | 4.99x10 <sup>-10</sup> |
| <i>C1orf173</i>  | 3.13951  | 3.439599 | 1.90x10 <sup>-10</sup> | 5.17x10 <sup>-10</sup> |
| <i>CXorf27</i>   | -5.7963  | -3.61908 | 1.96x10 <sup>-10</sup> | 5.33x10 <sup>-10</sup> |
| <i>SNTN</i>      | 3.047843 | 3.569552 | 2.23x10 <sup>-10</sup> | 6.04x10 <sup>-10</sup> |
| <i>LOC731789</i> | -3.67697 | -2.60683 | 2.24x10 <sup>-10</sup> | 6.07x10 <sup>-10</sup> |
| <i>INSRR</i>     | -2.72662 | -2.67673 | 2.27x10 <sup>-10</sup> | 6.15x10 <sup>-10</sup> |
| <i>PIWIL1</i>    | -4.45541 | -3.41114 | 2.37x10 <sup>-10</sup> | 6.42x10 <sup>-10</sup> |
| <i>CCDC19</i>    | 2.121123 | 2.810289 | 2.65x10 <sup>-10</sup> | 7.15x10 <sup>-10</sup> |
| <i>CPA2</i>      | -2.81394 | -2.62063 | 2.67x10 <sup>-10</sup> | 7.19x10 <sup>-10</sup> |
| <i>TAC1</i>      | -6.54227 | 2.581766 | 2.69x10 <sup>-10</sup> | 7.23x10 <sup>-10</sup> |

|                 |          |          |                        |                        |
|-----------------|----------|----------|------------------------|------------------------|
| <i>SI00P</i>    | -2.71135 | 5.271209 | 2.71x10 <sup>-10</sup> | 7.29x10 <sup>-10</sup> |
| <i>SFRP5</i>    | 2.583783 | 2.599678 | 2.75x10 <sup>-10</sup> | 7.39x10 <sup>-10</sup> |
| <i>GLYATL1</i>  | -3.10586 | -2.60335 | 2.88x10 <sup>-10</sup> | 7.72x10 <sup>-10</sup> |
| <i>CHRNA3</i>   | -3.52649 | -3.14069 | 2.90x10 <sup>-10</sup> | 7.78x10 <sup>-10</sup> |
| <i>RSPH1</i>    | 2.584705 | 3.700326 | 2.93x10 <sup>-10</sup> | 7.85x10 <sup>-10</sup> |
| <i>CXCL13</i>   | -3.24078 | 5.799349 | 2.97x10 <sup>-10</sup> | 7.97x10 <sup>-10</sup> |
| <i>NKX2-4</i>   | -5.89586 | -3.41655 | 3.07x10 <sup>-10</sup> | 8.20x10 <sup>-10</sup> |
| <i>FTHL17</i>   | -6.90104 | -2.63185 | 3.18x10 <sup>-10</sup> | 8.51x10 <sup>-10</sup> |
| <i>UGT2A1</i>   | -5.7789  | 3.462001 | 3.72x10 <sup>-10</sup> | 9.86x10 <sup>-10</sup> |
| <i>PHOX2A</i>   | -4.99561 | -3.10658 | 3.99x10 <sup>-10</sup> | 1.05x10 <sup>-9</sup>  |
| <i>GSTA2</i>    | 3.582071 | 2.603411 | 4.37x10 <sup>-10</sup> | 1.15x10 <sup>-9</sup>  |
| <i>NOS2</i>     | -2.64498 | 3.991118 | 4.87x10 <sup>-10</sup> | 1.27x10 <sup>-9</sup>  |
| <i>CCDC108</i>  | 3.251172 | 2.764581 | 5.56x10 <sup>-10</sup> | 1.45x10 <sup>-9</sup>  |
| <i>FGFBP2</i>   | -3.19186 | 5.266081 | 5.89x10 <sup>-10</sup> | 1.53x10 <sup>-9</sup>  |
| <i>C9orf152</i> | 2.073468 | 3.398808 | 6.63x10 <sup>-10</sup> | 1.72x10 <sup>-9</sup>  |
| <i>TBR1</i>     | -4.09608 | -3.22567 | 6.79x10 <sup>-10</sup> | 1.76x10 <sup>-9</sup>  |
| <i>ABCA13</i>   | -2.25745 | 4.88044  | 6.96x10 <sup>-10</sup> | 1.80x10 <sup>-9</sup>  |
| <i>GOLGA8C</i>  | -2.9237  | -2.76828 | 7.75x10 <sup>-10</sup> | 2.00x10 <sup>-9</sup>  |
| <i>GAGE8</i>    | -6.36717 | -2.83946 | 8.76x10 <sup>-10</sup> | 2.25x10 <sup>-9</sup>  |
| <i>PCSK2</i>    | 2.672955 | 2.534979 | 1.01x10 <sup>-9</sup>  | 2.57x10 <sup>-9</sup>  |
| <i>EMRI</i>     | 2.099182 | 3.137105 | 1.20x10 <sup>-9</sup>  | 3.03x10 <sup>-9</sup>  |
| <i>POU2F3</i>   | -2.06333 | 3.655956 | 1.32x10 <sup>-9</sup>  | 3.34x10 <sup>-9</sup>  |
| <i>MCF2</i>     | -2.47568 | -2.54402 | 1.39x10 <sup>-9</sup>  | 3.50x10 <sup>-9</sup>  |
| <i>CCDC17</i>   | 2.492549 | 2.917427 | 1.54x10 <sup>-9</sup>  | 3.87x10 <sup>-9</sup>  |
| <i>SCGB3A1</i>  | 2.842395 | 7.433927 | 1.60x10 <sup>-9</sup>  | 4.03x10 <sup>-9</sup>  |
| <i>SPAG6</i>    | 2.862104 | 3.339879 | 1.62x10 <sup>-9</sup>  | 4.06x10 <sup>-9</sup>  |
| <i>CNTN1</i>    | -2.01292 | 4.358467 | 1.81x10 <sup>-9</sup>  | 4.52x10 <sup>-9</sup>  |
| <i>KCNQ2</i>    | -4.14053 | -2.6942  | 1.83x10 <sup>-9</sup>  | 4.58x10 <sup>-9</sup>  |
| <i>CAMKV</i>    | -2.68728 | -3.13324 | 1.90x10 <sup>-9</sup>  | 4.73x10 <sup>-9</sup>  |

|                 |          |          |                       |                       |
|-----------------|----------|----------|-----------------------|-----------------------|
| <i>ACER1</i>    | -3.07477 | -2.69471 | 1.99x10 <sup>-9</sup> | 4.96x10 <sup>-9</sup> |
| <i>FAM19A4</i>  | -2.53863 | -2.55513 | 2.14x10 <sup>-9</sup> | 5.33x10 <sup>-9</sup> |
| <i>MUC21</i>    | 2.278485 | 2.540057 | 2.50x10 <sup>-9</sup> | 6.17x10 <sup>-9</sup> |
| <i>CAPN6</i>    | -3.11217 | 3.666644 | 2.74x10 <sup>-9</sup> | 6.75x10 <sup>-9</sup> |
| <i>WIF1</i>     | 2.713044 | 6.324563 | 2.75x10 <sup>-9</sup> | 6.78x10 <sup>-9</sup> |
| <i>MUC13</i>    | -3.47405 | 2.672627 | 2.85x10 <sup>-9</sup> | 7.00x10 <sup>-9</sup> |
| <i>COX8C</i>    | -4.58714 | -2.74379 | 3.20x10 <sup>-9</sup> | 7.87x10 <sup>-9</sup> |
| <i>C11orf88</i> | 2.650823 | 2.528549 | 3.22x10 <sup>-9</sup> | 7.89x10 <sup>-9</sup> |
| <i>DMBT1</i>    | 2.643927 | 8.588842 | 3.25x10 <sup>-9</sup> | 7.98x10 <sup>-9</sup> |
| <i>DKK1</i>     | -2.09954 | 3.498    | 3.36x10 <sup>-9</sup> | 8.24x10 <sup>-9</sup> |
| <i>FAM154B</i>  | 2.223647 | 2.717322 | 4.98x10 <sup>-9</sup> | 1.21x10 <sup>-8</sup> |
| <i>CEACAM5</i>  | -2.76154 | 7.269976 | 7.16x10 <sup>-9</sup> | 1.71x10 <sup>-8</sup> |
| <i>IGF2AS</i>   | -2.76121 | -2.53216 | 7.20x10 <sup>-9</sup> | 1.72x10 <sup>-8</sup> |
| <i>FRMD7</i>    | -2.9345  | -3.39834 | 8.43x10 <sup>-9</sup> | 2.00x10 <sup>-8</sup> |
| <i>DEFB1</i>    | -2.04318 | 2.93202  | 8.43x10 <sup>-9</sup> | 2.00x10 <sup>-8</sup> |
| <i>TBX22</i>    | -5.48238 | -2.68717 | 1.06x10 <sup>-8</sup> | 2.51x10 <sup>-8</sup> |
| <i>MS4A6E</i>   | 2.961877 | -2.72928 | 1.20x10 <sup>-8</sup> | 2.82x10 <sup>-8</sup> |
| <i>NBPF4</i>    | -3.09161 | -3.32632 | 1.33x10 <sup>-8</sup> | 3.10x10 <sup>-8</sup> |
| <i>AADACL3</i>  | -6.42041 | -2.86713 | 1.48x10 <sup>-8</sup> | 3.44x10 <sup>-8</sup> |
| <i>CNTNAP4</i>  | -3.30739 | -2.93831 | 1.51x10 <sup>-8</sup> | 3.53x10 <sup>-8</sup> |
| <i>DCAF8L2</i>  | -5.05721 | -3.57649 | 1.88x10 <sup>-8</sup> | 4.36x10 <sup>-8</sup> |
| <i>TGMI</i>     | -2.15722 | 4.993564 | 1.89x10 <sup>-8</sup> | 4.37x10 <sup>-8</sup> |
| <i>MAFA</i>     | -2.4242  | -3.14635 | 2.04x10 <sup>-8</sup> | 4.70x10 <sup>-8</sup> |
| <i>ATCAY</i>    | -3.33912 | -2.99571 | 2.52x10 <sup>-8</sup> | 5.77x10 <sup>-8</sup> |
| <i>MC4R</i>     | -2.49967 | -2.75757 | 2.63x10 <sup>-8</sup> | 6.01x10 <sup>-8</sup> |
| <i>IGF2</i>     | -2.24102 | 7.23423  | 2.75x10 <sup>-8</sup> | 6.27x10 <sup>-8</sup> |
| <i>TH</i>       | -2.37237 | -2.70257 | 2.99x10 <sup>-8</sup> | 6.79x10 <sup>-8</sup> |
| <i>CLEC18C</i>  | -2.51416 | -2.98103 | 3.28x10 <sup>-8</sup> | 7.43x10 <sup>-8</sup> |
| <i>MDGA2</i>    | -3.4573  | -2.65637 | 3.36x10 <sup>-8</sup> | 7.61x10 <sup>-8</sup> |

|                  |          |          |                       |                       |
|------------------|----------|----------|-----------------------|-----------------------|
| <i>C20orf186</i> | -3.55462 | -3.28235 | 3.79x10 <sup>-8</sup> | 8.54x10 <sup>-8</sup> |
| <i>POM121L2</i>  | -2.46156 | -3.33389 | 4.20x10 <sup>-8</sup> | 9.45x10 <sup>-8</sup> |
| <i>SOX14</i>     | -4.80895 | -2.8308  | 4.50x10 <sup>-8</sup> | 1.01x10 <sup>-7</sup> |
| <i>ZNF716</i>    | -5.49591 | -3.2488  | 5.39x10 <sup>-8</sup> | 1.20x10 <sup>-7</sup> |
| <i>SCGB1D2</i>   | -4.4169  | -2.88932 | 5.41x10 <sup>-8</sup> | 1.20x10 <sup>-7</sup> |
| <i>AKR1C4</i>    | -3.93569 | -3.08326 | 5.47x10 <sup>-8</sup> | 1.22x10 <sup>-7</sup> |
| <i>CPLX3</i>     | -2.5372  | -2.77169 | 5.79x10 <sup>-8</sup> | 1.29x10 <sup>-7</sup> |
| <i>C20orf191</i> | -4.93775 | -3.67253 | 5.99x10 <sup>-8</sup> | 1.33x10 <sup>-7</sup> |
| <i>C1orf94</i>   | -3.70422 | -2.58069 | 6.53x10 <sup>-8</sup> | 1.45x10 <sup>-7</sup> |
| <i>OPRD1</i>     | -4.18734 | -3.78832 | 6.58x10 <sup>-8</sup> | 1.45x10 <sup>-7</sup> |
| <i>GABRB1</i>    | -3.58686 | -3.22081 | 7.29x10 <sup>-8</sup> | 1.60x10 <sup>-7</sup> |
| <i>PENK</i>      | -2.5541  | 3.481725 | 7.60x10 <sup>-8</sup> | 1.67x10 <sup>-7</sup> |
| <i>VSTM2B</i>    | -5.01872 | -3.15966 | 8.16x10 <sup>-8</sup> | 1.79x10 <sup>-7</sup> |
| <i>C12orf77</i>  | -3.91748 | -3.319   | 8.55x10 <sup>-8</sup> | 1.87x10 <sup>-7</sup> |
| <i>TEKT1</i>     | 3.161038 | 2.943243 | 8.97x10 <sup>-8</sup> | 1.96x10 <sup>-7</sup> |
| <i>RASGEF1C</i>  | -2.46314 | -3.19665 | 9.81x10 <sup>-8</sup> | 2.14x10 <sup>-7</sup> |
| <i>DSCR4</i>     | -4.75919 | -3.99255 | 1.07x10 <sup>-7</sup> | 2.33x10 <sup>-7</sup> |
| <i>KLK10</i>     | -2.03436 | 5.833879 | 1.10x10 <sup>-7</sup> | 2.38x10 <sup>-7</sup> |
| <i>FOXJ1</i>     | 2.127584 | 4.557733 | 1.11x10 <sup>-7</sup> | 2.41x10 <sup>-7</sup> |
| <i>HMX3</i>      | -4.89128 | -2.5705  | 1.12x10 <sup>-7</sup> | 2.43x10 <sup>-7</sup> |
| <i>KRT76</i>     | -3.97972 | -3.27028 | 1.18x10 <sup>-7</sup> | 2.56x10 <sup>-7</sup> |
| <i>ZNF648</i>    | -2.59926 | -3.35137 | 1.21x10 <sup>-7</sup> | 2.62x10 <sup>-7</sup> |
| <i>C1orf157</i>  | -3.40137 | -3.75718 | 1.22x10 <sup>-7</sup> | 2.64x10 <sup>-7</sup> |
| <i>SPATA21</i>   | -3.61034 | -3.70928 | 1.26x10 <sup>-7</sup> | 2.71x10 <sup>-7</sup> |
| <i>C4orf7</i>    | -4.36053 | 4.959661 | 1.34x10 <sup>-7</sup> | 2.90x10 <sup>-7</sup> |
| <i>C20orf85</i>  | 3.06583  | 4.036925 | 1.41x10 <sup>-7</sup> | 3.03x10 <sup>-7</sup> |
| <i>GLRA4</i>     | -4.04952 | -3.27495 | 1.52x10 <sup>-7</sup> | 3.26x10 <sup>-7</sup> |
| <i>CRH</i>       | 3.124759 | -3.1472  | 1.61x10 <sup>-7</sup> | 3.45x10 <sup>-7</sup> |
| <i>LOC93432</i>  | -4.12767 | -3.16767 | 2.89x10 <sup>-7</sup> | 6.08x10 <sup>-7</sup> |

|                 |          |          |                       |                       |
|-----------------|----------|----------|-----------------------|-----------------------|
| <i>SERPIND1</i> | 2.210161 | 3.301047 | 3.26x10 <sup>-7</sup> | 6.82x10 <sup>-7</sup> |
| <i>MS4A8B</i>   | 2.912419 | 3.611291 | 3.94x10 <sup>-7</sup> | 8.19x10 <sup>-7</sup> |
| <i>FGF</i>      | -4.24347 | 2.862794 | 4.06x10 <sup>-7</sup> | 8.42x10 <sup>-7</sup> |
| <i>EDN2</i>     | -2.25175 | 2.919081 | 5.16x10 <sup>-7</sup> | 1.06x10 <sup>-6</sup> |
| <i>BSND</i>     | -2.89313 | -3.23729 | 5.24x10 <sup>-7</sup> | 1.08x10 <sup>-6</sup> |
| <i>SELE</i>     | 2.25352  | 5.033211 | 5.79x10 <sup>-7</sup> | 1.19x10 <sup>-6</sup> |
| <i>TCL1B</i>    | -3.07857 | -2.7062  | 5.83x10 <sup>-7</sup> | 1.19x10 <sup>-6</sup> |
| <i>ATP12A</i>   | -2.4273  | 3.201032 | 6.02x10 <sup>-7</sup> | 1.23x10 <sup>-6</sup> |
| <i>SCGB1A1</i>  | 2.911835 | 9.457863 | 6.68x10 <sup>-7</sup> | 1.37x10 <sup>-6</sup> |
| <i>FOXR2</i>    | -5.75887 | -2.99547 | 6.74x10 <sup>-7</sup> | 1.38x10 <sup>-6</sup> |
| <i>SULT2A1</i>  | -4.19436 | -3.85654 | 7.08x10 <sup>-7</sup> | 1.44x10 <sup>-6</sup> |
| <i>NPPB</i>     | -4.28868 | -3.46251 | 8.38x10 <sup>-7</sup> | 1.69x10 <sup>-6</sup> |
| <i>SYT10</i>    | -2.56443 | -2.72388 | 1.08x10 <sup>-6</sup> | 2.16x10 <sup>-6</sup> |
| <i>FEZF2</i>    | -4.17444 | -4.06582 | 1.33x10 <sup>-6</sup> | 2.65x10 <sup>-6</sup> |
| <i>DCAF12L1</i> | -3.59031 | -2.50235 | 1.39x10 <sup>-6</sup> | 2.75x10 <sup>-6</sup> |
| <i>ZPI</i>      | -2.16183 | -3.04669 | 1.42x10 <sup>-6</sup> | 2.82x10 <sup>-6</sup> |
| <i>GSTM1</i>    | -3.50092 | 5.434617 | 1.60x10 <sup>-6</sup> | 3.15x10 <sup>-6</sup> |
| <i>CA7</i>      | -2.43368 | -3.58224 | 1.69x10 <sup>-6</sup> | 3.33x10 <sup>-6</sup> |
| <i>C14orf39</i> | -2.4426  | -3.1265  | 1.88x10 <sup>-6</sup> | 3.68x10 <sup>-6</sup> |
| <i>LGALS14</i>  | -4.29968 | -3.0098  | 2.33x10 <sup>-6</sup> | 4.53x10 <sup>-6</sup> |
| <i>CCL19</i>    | -2.05217 | 5.32893  | 2.64x10 <sup>-6</sup> | 5.11x10 <sup>-6</sup> |
| <i>DNTT</i>     | -3.17827 | -3.58681 | 3.30x10 <sup>-6</sup> | 6.33x10 <sup>-6</sup> |
| <i>CYP26C1</i>  | -2.12562 | -3.16383 | 3.39x10 <sup>-6</sup> | 6.49x10 <sup>-6</sup> |
| <i>GBX1</i>     | -3.68749 | -3.76625 | 3.54x10 <sup>-6</sup> | 6.78x10 <sup>-6</sup> |
| <i>C2orf39</i>  | 2.224906 | 2.644325 | 3.69x10 <sup>-6</sup> | 7.05x10 <sup>-6</sup> |
| <i>HHATL</i>    | 2.10659  | -3.03071 | 4.21x10 <sup>-6</sup> | 8.02x10 <sup>-6</sup> |
| <i>SLC5A11</i>  | -2.0596  | -2.92594 | 5.73x10 <sup>-6</sup> | 1.08x10 <sup>-5</sup> |
| <i>XKR7</i>     | -2.15713 | -3.42698 | 1.35x10 <sup>-5</sup> | 2.46x10 <sup>-5</sup> |
| <i>GYS2</i>     | -2.01912 | -2.5622  | 1.56x10 <sup>-5</sup> | 2.83x10 <sup>-5</sup> |

|                  |          |          |                       |                       |
|------------------|----------|----------|-----------------------|-----------------------|
| <i>C20orf114</i> | 2.499937 | 7.563266 | 1.65x10 <sup>-5</sup> | 2.98x10 <sup>-5</sup> |
| <i>SLC38A8</i>   | -2.64872 | -3.54078 | 2.38x10 <sup>-5</sup> | 4.24x10 <sup>-5</sup> |
| <i>SERPINB11</i> | -2.97848 | 2.570037 | 2.74x10 <sup>-5</sup> | 4.86x10 <sup>-5</sup> |
| <i>CDH7</i>      | -2.1113  | -3.24789 | 4.68x10 <sup>-5</sup> | 8.16x10 <sup>-5</sup> |
| <i>PSCA</i>      | -2.04468 | 4.319455 | 1.27x10 <sup>-4</sup> | 2.13x10 <sup>-4</sup> |
| <i>HTR1E</i>     | -2.6035  | -3.91527 | 1.28x10 <sup>-4</sup> | 2.15x10 <sup>-4</sup> |
| <i>NRSN1</i>     | -2.621   | -2.55752 | 3.49x10 <sup>-4</sup> | 5.63x10 <sup>-4</sup> |
| <i>KCNH5</i>     | -2.03462 | -2.54537 | 7.22x10 <sup>-4</sup> | 1.13x10 <sup>-3</sup> |
| <i>AGXT</i>      | -2.00286 | -3.12057 | 5.10x10 <sup>-3</sup> | 7.35x10 <sup>-3</sup> |

---

logFC, log<sub>2</sub> fold-change; logCPM, log<sub>2</sub> counts-per-million; FDR, false discovery rate.

Table SV. Candidate genes for time-to-event instrument variable analysis in lung cancer.

| Lung squamous cell carcinoma | Lung adenocarcinoma |
|------------------------------|---------------------|
| <i>TBX4</i>                  | <i>TBX4</i>         |
| <i>TP73</i>                  | <i>C17orf93</i>     |
| <i>DLX5</i>                  | <i>ECSCR</i>        |
| <i>TRIM59</i>                | <i>ADAMTS20</i>     |
| <i>LY6K</i>                  | <i>SHCBP1</i>       |
| <i>SHCBP1</i>                | <i>CA3</i>          |
| <i>KRTDAP</i>                | <i>EFNA4</i>        |
| <i>GPR116</i>                | <i>LYPD1</i>        |
| <i>COL17A1</i>               | <i>GNG4</i>         |
| <i>GPIHBP1</i>               | <i>AIM2</i>         |
| <i>LCE1F</i>                 | <i>TCN1</i>         |
| <i>AFF3</i>                  | <i>CAV1</i>         |
| <i>LCE1E</i>                 | <i>C2CD4A</i>       |
| <i>CADM3</i>                 | <i>GRIA1</i>        |
| <i>CEACAM5</i>               | <i>GPBR</i>         |
| <i>CNTNAP5</i>               | <i>SOX17</i>        |
| <i>SCGB1D2</i>               | <i>FOXE3</i>        |
| <i>TMEM40</i>                | <i>TAL1</i>         |
| <i>PKP3</i>                  | <i>RRM2</i>         |
| <i>ATP12A</i>                | <i>FAM83A</i>       |
| <i>STAC</i>                  | <i>NECAB1</i>       |
| <i>TBX20</i>                 | <i>CLDN5</i>        |
| <i>IL1F9</i>                 | <i>CALCA</i>        |
| <i>KLK6</i>                  | <i>SERPINB5</i>     |

|                 |                  |
|-----------------|------------------|
| <i>ARNTL2</i>   | <i>AFF3</i>      |
| <i>GNG4</i>     | <i>CRYAB</i>     |
| <i>RASGRP4</i>  | <i>ARNTL2</i>    |
| <i>DLC1</i>     | <i>11-Mar</i>    |
| <i>TAL1</i>     | <i>LOC645323</i> |
| <i>SLITRK1</i>  | <i>UNC5CL</i>    |
| <i>SFN</i>      | <i>PEAR1</i>     |
| <i>GRIA1</i>    | <i>DLC1</i>      |
| <i>CABLES1</i>  | <i>TFAP2A</i>    |
| <i>TFAP2B</i>   | <i>MYEOV</i>     |
| <i>CD36</i>     | <i>ARHGEF15</i>  |
| <i>NKX2-4</i>   | <i>MELK</i>      |
| <i>GPC1</i>     | <i>NKX2-4</i>    |
| <i>TSKU</i>     | <i>ODZ4</i>      |
| <i>ZP3</i>      | <i>FABP4</i>     |
| <i>CCNB1</i>    | <i>LY6K</i>      |
| <i>TFAP2A</i>   | <i>ADAMTSL4</i>  |
| <i>SERPINB5</i> | <i>SCN4B</i>     |
| <i>KRT5</i>     | <i>DPEP2</i>     |
| <i>GINS4</i>    | <i>LGR4</i>      |
| <i>GJB5</i>     | <i>BDNF</i>      |
| <i>CALML3</i>   | <i>SMAD6</i>     |
| <i>PRC1</i>     | <i>PHLDA2</i>    |
| <i>ADAM12</i>   | <i>ETV4</i>      |
| <i>HK3</i>      | <i>PHOX2B</i>    |
| <i>HOXA10</i>   | <i>PAX7</i>      |
| <i>SCARF1</i>   | <i>PKMYT1</i>    |
| <i>ZMYND10</i>  | <i>CTHRC1</i>    |
| <i>PLEKHG6</i>  | <i>C1orf106</i>  |



|                  |                |
|------------------|----------------|
| <i>RRM2</i>      | <i>NPTX2</i>   |
| <i>ITGB4</i>     | <i>DLX2</i>    |
| <i>AK3L1</i>     | <i>ITIH5</i>   |
| <i>FRMD6</i>     | <i>BUB1B</i>   |
| <i>FOXJ1</i>     | <i>CCDC85A</i> |
| <i>LOC642587</i> | <i>C2orf40</i> |
| <i>ARTN</i>      | <i>SCGB1D2</i> |
| <i>A2ML1</i>     | <i>NKX2-5</i>  |
| <i>COL11A1</i>   | <i>PPP2R2C</i> |
| <i>ZNF648</i>    | <i>SLC4A11</i> |
| <i>MELK</i>      | <i>COL17A1</i> |
| <i>SLC5A11</i>   | <i>TFF2</i>    |
| <i>CFTR</i>      | <i>FZD10</i>   |
| <i>CYP4F3</i>    | <i>CD36</i>    |
| <i>ZNF716</i>    | <i>OCIAD2</i>  |
| <i>SLC26A9</i>   | <i>CDCA7</i>   |
| <i>TENCI</i>     | <i>IL6</i>     |
| <i>FAM83D</i>    | <i>CNTNAP4</i> |
| <i>CD33</i>      | <i>MDGA2</i>   |
| <i>FAT2</i>      | <i>CCNB1</i>   |
| <i>TCL1B</i>     | <i>CABYR</i>   |
| <i>CD93</i>      | <i>COL11A1</i> |
| <i>FEZF2</i>     | <i>CRTAC1</i>  |
| <i>HMX3</i>      | <i>HOXC12</i>  |
| <i>PRLR</i>      | <i>KLK9</i>    |
| <i>CDH3</i>      | <i>MMP1</i>    |
| <i>PEAR1</i>     | <i>GDF10</i>   |
| <i>DMRT2</i>     | <i>GREM1</i>   |
| <i>SOST</i>      | <i>CIQTNF7</i> |

|                   |                  |
|-------------------|------------------|
| <i>UGT1A6</i>     | <i>OR56A3</i>    |
| <i>FCN1</i>       | <i>EDNRB</i>     |
| <i>SLC1A4</i>     | <i>ITLN2</i>     |
| <i>SLC16A1</i>    | <i>ASCL1</i>     |
| <i>SERPINB13</i>  | <i>SOX11</i>     |
| <i>GRHL3</i>      | <i>CDT1</i>      |
| <i>RAX</i>        | <i>PRX</i>       |
| <i>NGEF</i>       | <i>NEFH</i>      |
| <i>RAPGEFL1</i>   | <i>ACVRL1</i>    |
| <i>NRCAM</i>      | <i>P2RY6</i>     |
| <i>DPEP2</i>      | <i>IGSF9</i>     |
| <i>CBLC</i>       | <i>IVL</i>       |
| <i>C19orf48</i>   | <i>IQGAP3</i>    |
| <i>CTHRC1</i>     | <i>ADCY4</i>     |
| <i>DSC2</i>       | <i>NOTO</i>      |
| <i>HNF1B</i>      | <i>LOC153910</i> |
| <i>CDO1</i>       | <i>SLC16A14</i>  |
| <i>SOX17</i>      | <i>NCAPG</i>     |
| <i>ST6GALNAC5</i> | <i>STEAP1</i>    |
| <i>PRAME</i>      | <i>KIF1A</i>     |
| <i>LOC149620</i>  | <i>CCL14</i>     |
| <i>LAMC2</i>      | <i>MME</i>       |
| <i>AGER</i>       | <i>BARX1</i>     |
| <i>SFTA3</i>      | <i>ZBTB16</i>    |
| <i>CRH</i>        | <i>EMP2</i>      |
| <i>CCDC108</i>    | <i>FERMT1</i>    |
| <i>SLC34A2</i>    | <i>AGR2</i>      |
| <i>ETV4</i>       | <i>EPHX3</i>     |
| <i>TGM1</i>       | <i>GOLGA7B</i>   |

|                  |                 |
|------------------|-----------------|
| <i>CYP26C1</i>   | <i>SOHLH1</i>   |
| <i>ITGA6</i>     | <i>MMP13</i>    |
| <i>C16orf74</i>  | <i>ST8SIA3</i>  |
| <i>MSR1</i>      | <i>HSPA12B</i>  |
| <i>PRDM9</i>     | <i>POSTN</i>    |
| <i>ANKRD22</i>   | <i>PRC1</i>     |
| <i>MACROD2</i>   | <i>FAM101A</i>  |
| <i>ODZ4</i>      | <i>KCNN4</i>    |
| <i>PDE2A</i>     | <i>HHIP</i>     |
| <i>MGC14436</i>  | <i>FCN3</i>     |
| <i>PKMYT1</i>    | <i>C8orf73</i>  |
| <i>CNTNAP4</i>   | <i>ABCC3</i>    |
| <i>TM4SF19</i>   | <i>C6orf174</i> |
| <i>PRDM16</i>    | <i>CA7</i>      |
| <i>C20orf186</i> | <i>ABCA9</i>    |
| <i>MNDA</i>      | <i>ADAMTS12</i> |
| <i>C2CD4A</i>    | <i>SELP</i>     |
| <i>EMP2</i>      | <i>FNDC1</i>    |
| <i>RAB6B</i>     | <i>CXCL2</i>    |
| <i>KRT15</i>     | <i>NXPH1</i>    |
| <i>LGR4</i>      | <i>KIF18B</i>   |
| <i>LRFN2</i>     | <i>NT5E</i>     |
| <i>CDCA8</i>     | <i>SCUBE1</i>   |
| <i>IGSF9</i>     | <i>KRT80</i>    |
| <i>TRIM29</i>    | <i>ONECUT3</i>  |
| <i>WNT10A</i>    | <i>CDCA8</i>    |
| <i>TMPRSS4</i>   | <i>IGFBP3</i>   |
| <i>COL6A6</i>    | <i>SLC6A3</i>   |
| <i>FANCE</i>     | <i>PLK1</i>     |

|                 |                 |
|-----------------|-----------------|
| <i>LCE3A</i>    | <i>HBB</i>      |
| <i>RAB37</i>    | <i>C4orf26</i>  |
| <i>ALDH3B2</i>  | <i>KIAA1199</i> |
| <i>ODZ2</i>     | <i>ADAMTS8</i>  |
| <i>SEMA4B</i>   | <i>KCNK3</i>    |
| <i>ADAM23</i>   | <i>CDO1</i>     |
| <i>FAM167A</i>  | <i>IGFL3</i>    |
| <i>CPA3</i>     | <i>VGLL2</i>    |
| <i>CPAMD8</i>   | <i>FGFR4</i>    |
| <i>NECAB1</i>   | <i>DBNDD1</i>   |
| <i>DAPL1</i>    | <i>AVPR1B</i>   |
| <i>C10orf99</i> | <i>WNT3A</i>    |
| <i>GJB3</i>     | <i>GPIHBP1</i>  |
| <i>PDE4C</i>    | <i>PTTG1</i>    |
| <i>FBXO27</i>   | <i>NGEF</i>     |
| <i>SPRR1A</i>   | <i>LYVE1</i>    |
| <i>PERP</i>     | <i>ALDH3B2</i>  |
| <i>CYP4F11</i>  | <i>ACOXL</i>    |
| <i>DSG1</i>     | <i>FAM162B</i>  |
| <i>ECSCR</i>    | <i>DES</i>      |
| <i>EDNRB</i>    | <i>PDK4</i>     |
| <i>MMP1</i>     | <i>RTL1</i>     |
| <i>CLEC3B</i>   | <i>CLEC3A</i>   |
| <i>LGALS7B</i>  | <i>GABRA5</i>   |
| <i>PTPRZ1</i>   | <i>SFTPC</i>    |
| <i>MARCO</i>    | <i>WIF1</i>     |
| <i>PGR</i>      | <i>KC6</i>      |
| <i>GPR133</i>   | <i>LOC84740</i> |
| <i>SMAD6</i>    | <i>FUT3</i>     |

|                 |                  |
|-----------------|------------------|
| <i>SPAG6</i>    | <i>NCAPH</i>     |
| <i>FGR</i>      | <i>CBX2</i>      |
| <i>MS4A8B</i>   | <i>B3GNT6</i>    |
| <i>CSTA</i>     | <i>KRT6A</i>     |
| <i>CA3</i>      | <i>MSMP</i>      |
| <i>DSC3</i>     | <i>DSP</i>       |
| <i>SDPR</i>     | <i>CDK5R1</i>    |
| <i>ATAD5</i>    | <i>PCSK2</i>     |
| <i>CXCR1</i>    | <i>CPXM1</i>     |
| <i>CYP4B1</i>   | <i>CAMKV</i>     |
| <i>ROS1</i>     | <i>SLC5A9</i>    |
| <i>ACOX2</i>    | <i>SLC38A8</i>   |
| <i>ADCY4</i>    | <i>LRFN2</i>     |
| <i>F2RL3</i>    | <i>COL1A2</i>    |
| <i>CHIA</i>     | <i>LTBP4</i>     |
| <i>ALDH3B1</i>  | <i>TNFRSF21</i>  |
| <i>S1PR4</i>    | <i>POU2AF1</i>   |
| <i>C20orf56</i> | <i>ROBO4</i>     |
| <i>TMEM100</i>  | <i>NCKAP5</i>    |
| <i>PAX9</i>     | <i>C14orf162</i> |
| <i>KRT6A</i>    | <i>KRT23</i>     |
| <i>GSDMC</i>    | <i>AGT</i>       |
| <i>PHYHD1</i>   | <i>CPLX2</i>     |
| <i>MAFA</i>     | <i>EPAS1</i>     |
| <i>C1orf130</i> | <i>SIRPB1</i>    |
| <i>KLK8</i>     | <i>GLYATL1</i>   |
| <i>C1orf68</i>  | <i>ANGPT1</i>    |
| <i>PPP2R2C</i>  | <i>C15orf48</i>  |
| <i>FERMT1</i>   | <i>AK3L1</i>     |

|                 |                 |
|-----------------|-----------------|
| <i>NDRG1</i>    | <i>ABCA4</i>    |
| <i>NR4A1</i>    | <i>KL</i>       |
| <i>CLIC5</i>    | <i>HMGA2</i>    |
| <i>AMTN</i>     | <i>FGR</i>      |
| <i>SELENBP1</i> | <i>BHMT2</i>    |
| <i>KRT75</i>    | <i>C13orf36</i> |
| <i>CCRL2</i>    | <i>DKK2</i>     |
| <i>ALDH3A1</i>  | <i>SOX7</i>     |
| <i>HHATL</i>    | <i>FHL5</i>     |
| <i>PI3</i>      | <i>FOXF1</i>    |
| <i>GABRB1</i>   | <i>NPSR1</i>    |
| <i>PLA2G2A</i>  | <i>PROM2</i>    |
| <i>RETN</i>     | <i>FA2H</i>     |
| <i>MS4A6E</i>   | <i>SELE</i>     |
| <i>KIAA0802</i> | <i>TM4SF4</i>   |
| <i>IGF2BP3</i>  | <i>FOXL2</i>    |
| <i>OVOL1</i>    | <i>BMP8A</i>    |
| <i>SLC7A11</i>  | <i>GCOM1</i>    |
| <i>CABYR</i>    | <i>APOA4</i>    |
| <i>PLA2G1B</i>  | <i>LECT1</i>    |
| <i>CILP2</i>    | <i>BMPER</i>    |
| <i>ADAMTS8</i>  | <i>MUC21</i>    |
| <i>HELLS</i>    | <i>NDRG4</i>    |
| <i>LADI</i>     | <i>FAM92B</i>   |
| <i>ITGA11</i>   | <i>MTMR7</i>    |
| <i>HOXB9</i>    | <i>VCAN</i>     |
| <i>CCL14</i>    | <i>SYT13</i>    |
| <i>SIRPB1</i>   | <i>PNLIPRP3</i> |
| <i>FHL5</i>     | <i>NPTX1</i>    |

|                 |                 |
|-----------------|-----------------|
| <i>CBR3</i>     | <i>COL6A6</i>   |
| <i>TTLL12</i>   | <i>PDZD2</i>    |
| <i>EPHA1</i>    | <i>HTR3A</i>    |
| <i>SFRP5</i>    | <i>UNC93A</i>   |
| <i>FOXA2</i>    | <i>FUT2</i>     |
| <i>AATK</i>     | <i>EFNA2</i>    |
| <i>AGXT</i>     | <i>ADH1B</i>    |
| <i>COL29A1</i>  | <i>PRDM9</i>    |
| <i>JUP</i>      | <i>TSPAN8</i>   |
| <i>MUC21</i>    | <i>GINS2</i>    |
| <i>TMEM79</i>   | <i>CLIC5</i>    |
| <i>OPRD1</i>    | <i>FNDC4</i>    |
| <i>COL22A1</i>  | <i>SLC7A11</i>  |
| <i>C1orf106</i> | <i>ADAMTSL3</i> |
| <i>KLHDC7B</i>  | <i>SCN7A</i>    |
| <i>PHOX2A</i>   | <i>PVRL4</i>    |
| <i>DKK4</i>     | <i>CLEC1A</i>   |
| <i>NCAPG</i>    | <i>B3GNT3</i>   |
| <i>B4GALNT1</i> | <i>SEMA6D</i>   |
| <i>DLK1</i>     | <i>PLUNC</i>    |
| <i>FPR1</i>     | <i>CEACAM5</i>  |
| <i>NEFL</i>     | <i>CBLC</i>     |
| <i>LMO3</i>     | <i>GINS4</i>    |
| <i>EFNA3</i>    | <i>VTCN1</i>    |
| <i>MLPH</i>     | <i>ADM2</i>     |
| <i>LASS3</i>    | <i>EPR1</i>     |
| <i>RNASEH2A</i> | <i>RHOV</i>     |
| <i>CCDC19</i>   | <i>NEK2</i>     |
| <i>FNDC1</i>    | <i>ABP1</i>     |

|                 |                |
|-----------------|----------------|
| <i>VWA3B</i>    | <i>DUOX2</i>   |
| <i>PVRL4</i>    | <i>NKX6-1</i>  |
| <i>EXOC3L</i>   | <i>MFAP4</i>   |
| <i>MMP11</i>    | <i>CHEK1</i>   |
| <i>MYB</i>      | <i>GJB3</i>    |
| <i>CXCL13</i>   | <i>TPPP3</i>   |
| <i>PIWIL1</i>   | <i>PLA2G2A</i> |
| <i>GIMAP8</i>   | <i>CILP2</i>   |
| <i>C17orf72</i> | <i>RET</i>     |
| <i>SLCO1B1</i>  | <i>FGL1</i>    |
| <i>CYP24A1</i>  | <i>TFF1</i>    |
| <i>CD34</i>     | <i>IGF2BP3</i> |
| <i>SSTR5</i>    | <i>DIO2</i>    |
| <i>MCM6</i>     | <i>KCNT2</i>   |
| <i>CCDC85A</i>  | <i>DARC</i>    |
| <i>C20orf85</i> | <i>TMPRSS4</i> |
| <i>S100A8</i>   | <i>GPM6A</i>   |
| <i>PKD4</i>     | <i>MTIM</i>    |
| <i>TH</i>       | <i>KLK5</i>    |
| <i>FGF19</i>    | <i>MUC6</i>    |
| <i>C2orf40</i>  | <i>F11</i>     |
| <i>SMOX</i>     | <i>CELSR3</i>  |
| <i>SPAG5</i>    | <i>VEPH1</i>   |
| <i>DLK2</i>     | <i>MARCO</i>   |
| <i>PCDH12</i>   | <i>GPRIN1</i>  |
| <i>CD109</i>    | <i>EEF1A2</i>  |
| <i>KANK2</i>    | <i>JAM2</i>    |
| <i>TFAP2C</i>   | <i>ANLN</i>    |
| <i>MRAP2</i>    | <i>CLEC3B</i>  |



|                |                  |
|----------------|------------------|
| <i>UNC93A</i>  | <i>RFX6</i>      |
| <i>BEST2</i>   | <i>MMP11</i>     |
| <i>TIE1</i>    | <i>PCOLCE2</i>   |
| <i>KCNQ2</i>   | <i>GABRP</i>     |
| <i>GGH</i>     | <i>PITX1</i>     |
| <i>APOBEC1</i> | <i>EDN2</i>      |
| <i>HYAL1</i>   | <i>AGER</i>      |
| <i>BUB1B</i>   | <i>LOC284798</i> |
| <i>HYDIN</i>   | <i>ESPL1</i>     |
| <i>COX8C</i>   | <i>PTPRH</i>     |
| <i>ACVRL1</i>  | <i>OSCAR</i>     |
| <i>CDC25A</i>  | <i>LOC149620</i> |
| <i>MDGA2</i>   | <i>TMEM100</i>   |
| <i>KMO</i>     | <i>ALOX15</i>    |
| <i>CX3CR1</i>  | <i>KRT15</i>     |
| <i>F10</i>     | <i>SYT15</i>     |
| <i>HHIP</i>    | <i>HES6</i>      |
| <i>SOX15</i>   | <i>UBE2U</i>     |
| <i>KLK10</i>   | <i>AQP4</i>      |
| <i>FILIP1</i>  | <i>CSF3</i>      |
| <i>A2M</i>     | <i>H19</i>       |
| <i>UBE2C</i>   | <i>GJB2</i>      |
| <i>C11orf9</i> | <i>COL1A1</i>    |
| <i>LRRC15</i>  | <i>CST1</i>      |
| <i>UGT2A1</i>  | <i>HBEGF</i>     |
| <i>FGFR4</i>   | <i>CCDC17</i>    |
| <i>IQGAP3</i>  | <i>SLC46A2</i>   |
| <i>NPTX2</i>   | <i>SCGB1A1</i>   |
| <i>HBB</i>     | <i>FPR2</i>      |

|                 |                  |
|-----------------|------------------|
| <i>TP63</i>     | <i>STYK1</i>     |
| <i>CD302</i>    | <i>AHNAK2</i>    |
| <i>GRASP</i>    | <i>STXBP6</i>    |
| <i>DNTT</i>     | <i>PHACTR1</i>   |
| <i>LOC93432</i> | <i>LOC283404</i> |
| <i>ABCA4</i>    | <i>SLIT2</i>     |
| <i>HTR1E</i>    | <i>EZH2</i>      |
| <i>MT1A</i>     | <i>C10orf116</i> |
| <i>ATCAY</i>    | <i>PLEK2</i>     |
| <i>CLDN18</i>   | <i>TUBB2B</i>    |
| <i>NCKAP5</i>   | <i>HIGD1B</i>    |
| <i>GPX2</i>     | <i>CNTN6</i>     |
| <i>EDN2</i>     | <i>STX11</i>     |
| <i>FKBP4</i>    | <i>CLDN6</i>     |
| <i>GJB6</i>     | <i>PKNOX2</i>    |
| <i>PHACTR1</i>  | <i>DUOX1</i>     |
| <i>CDKL2</i>    | <i>SPP1</i>      |
| <i>PRR15L</i>   | <i>TF</i>        |
| <i>WIF1</i>     | <i>RETN</i>      |
| <i>STEAP1</i>   | <i>ERO1L</i>     |
| <i>ALDH1L1</i>  | <i>CDH2</i>      |
| <i>GPD1L</i>    | <i>CAV2</i>      |
| <i>NRGN</i>     | <i>RHBDL2</i>    |
| <i>COL1A1</i>   | <i>GPX2</i>      |
| <i>MUC13</i>    | <i>PPAP2C</i>    |
| <i>NEK2</i>     | <i>ESPN</i>      |
| <i>GINS2</i>    | <i>FCRL5</i>     |
| <i>KL</i>       | <i>RFPL4B</i>    |
| <i>SYT16</i>    | <i>CYS1</i>      |

|                  |                  |
|------------------|------------------|
| <i>TMPRSS2</i>   | <i>CA4</i>       |
| <i>PTTG1</i>     | <i>DNASE1L3</i>  |
| <i>GBX2</i>      | <i>KIFC1</i>     |
| <i>ZBTB16</i>    | <i>PBK</i>       |
| <i>POU2F3</i>    | <i>OLR1</i>      |
| <i>TNFRSF18</i>  | <i>GIMAP8</i>    |
| <i>PLEKHG4B</i>  | <i>FANCI</i>     |
| <i>C20orf160</i> | <i>ACADL</i>     |
| <i>CEL</i>       | <i>MGC29506</i>  |
| <i>C13orf15</i>  | <i>SMOC1</i>     |
| <i>TPPP3</i>     | <i>LRRC32</i>    |
| <i>C1orf74</i>   | <i>LRRC36</i>    |
| <i>DARC</i>      | <i>CCNF</i>      |
| <i>CAPN9</i>     | <i>MS4A7</i>     |
| <i>KIFC1</i>     | <i>HOXB7</i>     |
| <i>ANLN</i>      | <i>PANX2</i>     |
| <i>GREM1</i>     | <i>LRRC15</i>    |
| <i>MS4A7</i>     | <i>GKN1</i>      |
| <i>NCAPH</i>     | <i>IL4I1</i>     |
| <i>LMO7</i>      | <i>CCDC48</i>    |
| <i>CCDC17</i>    | <i>METTL7B</i>   |
| <i>RSPH1</i>     | <i>LOC116437</i> |
| <i>SORD</i>      | <i>KCNE4</i>     |
| <i>CA7</i>       | <i>MFI2</i>      |
| <i>NRSN1</i>     | <i>RBP4</i>      |
| <i>PITX1</i>     | <i>NKX1-2</i>    |
| <i>PPP1R16B</i>  | <i>ITGA11</i>    |
| <i>FGD5</i>      | <i>ADAM8</i>     |
| <i>PARD6G</i>    | <i>C14orf132</i> |

|                  |                  |
|------------------|------------------|
| <i>RNASE1</i>    | <i>SSTR1</i>     |
| <i>NRARP</i>     | <i>ATOH7</i>     |
| <i>LOC146336</i> | <i>CAPN3</i>     |
| <i>FAM184A</i>   | <i>MTNR1A</i>    |
| <i>RHBDL2</i>    | <i>NTRK2</i>     |
| <i>FAM162B</i>   | <i>KIF11</i>     |
| <i>KIAA1683</i>  | <i>COMP</i>      |
| <i>FOLR1</i>     | <i>LCN2</i>      |
| <i>GAPDH</i>     | <i>LGALS4</i>    |
| <i>ICAM2</i>     | <i>MUC5B</i>     |
| <i>KCNA3</i>     | <i>FAP</i>       |
| <i>DNASE1L3</i>  | <i>AKR1C1</i>    |
| <i>GABRP</i>     | <i>SBK1</i>      |
| <i>KCTD1</i>     | <i>LIMS2</i>     |
| <i>AKR1C2</i>    | <i>DKK1</i>      |
| <i>PBK</i>       | <i>TGM1</i>      |
| <i>AQP1</i>      | <i>NPR1</i>      |
| <i>LTB4R2</i>    | <i>GALNT6</i>    |
| <i>CSRNP1</i>    | <i>C3orf30</i>   |
| <i>RASGRP2</i>   | <i>SFTPD</i>     |
| <i>CD300LG</i>   | <i>TGFBR3</i>    |
| <i>GPRIN1</i>    | <i>C20orf160</i> |
| <i>GDF10</i>     | <i>SLC14A1</i>   |
| <i>EPN3</i>      | <i>SPAG5</i>     |
| <i>MMRN2</i>     | <i>RPL13AP17</i> |
| <i>LILRA5</i>    | <i>C8B</i>       |
| <i>CDK5R1</i>    | <i>QPCT</i>      |
| <i>SBK1</i>      | <i>PLA2G1B</i>   |
| <i>MFAP4</i>     | <i>FAM189A2</i>  |

|                  |                 |
|------------------|-----------------|
| <i>MFSD2A</i>    | <i>TCF21</i>    |
| <i>PNMA2</i>     | <i>KIAA1683</i> |
| <i>SYT7</i>      | <i>WNK2</i>     |
| <i>UBXN10</i>    | <i>GLDN</i>     |
| <i>SCGB3A1</i>   | <i>COL5A1</i>   |
| <i>LOC723809</i> | <i>TNXB</i>     |
| <i>C1orf116</i>  | <i>UGT8</i>     |
| <i>C10orf116</i> | <i>CYP4B1</i>   |
| <i>TMEM125</i>   | <i>TMEM59L</i>  |
| <i>SULT2A1</i>   | <i>PRAME</i>    |
| <i>RFC4</i>      | <i>WISP1</i>    |
| <i>GMPS</i>      | <i>COL7A1</i>   |
| <i>GCOM1</i>     | <i>GYLTL1B</i>  |
| <i>DSG2</i>      | <i>SLC2A1</i>   |
| <i>SPN</i>       | <i>S100P</i>    |
| <i>CENPM</i>     | <i>SMR3B</i>    |
| <i>GPBR</i>      | <i>GRASP</i>    |
| <i>GPM6A</i>     | <i>EIF4E1B</i>  |
| <i>SIX4</i>      | <i>TNSI</i>     |
| <i>ENG</i>       | <i>THBD</i>     |
| <i>GCLC</i>      | <i>UGT1A6</i>   |
| <i>CCDC68</i>    | <i>SLC6A4</i>   |
| <i>POSTN</i>     | <i>UCHL1</i>    |
| <i>GNG11</i>     | <i>FMO2</i>     |
| <i>PKP1</i>      | <i>COX4I2</i>   |
| <i>OLR1</i>      | <i>ARC</i>      |
| <i>EEF1A2</i>    | <i>IGSF10</i>   |
| <i>DKK1</i>      | <i>NMNAT2</i>   |
| <i>GRTP1</i>     | <i>BARX2</i>    |

|                  |                  |
|------------------|------------------|
| <i>SFTA2</i>     | <i>CDC6</i>      |
| <i>ARRB1</i>     | <i>ANKRD1</i>    |
| <i>ITGA8</i>     | <i>GALNT14</i>   |
| <i>C4orf26</i>   | <i>SYT12</i>     |
| <i>EPAS1</i>     | <i>KDEL3</i>     |
| <i>SELV</i>      | <i>STRA6</i>     |
| <i>FOLH1</i>     | <i>HHIPL2</i>    |
| <i>PSAT1</i>     | <i>VIPR1</i>     |
| <i>TROAP</i>     | <i>TTK</i>       |
| <i>LOC731789</i> | <i>CLDN18</i>    |
| <i>HSPA12B</i>   | <i>FAM107A</i>   |
| <i>ADAMTS12</i>  | <i>CYP24A1</i>   |
| <i>DPCR1</i>     | <i>GPX3</i>      |
| <i>RICH2</i>     | <i>SERINC2</i>   |
| <i>CENPA</i>     | <i>C7orf52</i>   |
| <i>TAC1</i>      | <i>CXCL14</i>    |
| <i>ADH7</i>      | <i>C14orf139</i> |
| <i>CDH7</i>      | <i>RTKN2</i>     |
| <i>KRT6C</i>     | <i>SEMA3G</i>    |
| <i>STX11</i>     | <i>KRT81</i>     |
| <i>FPR2</i>      | <i>ACHE</i>      |
| <i>BMP8A</i>     | <i>IL1RL1</i>    |
| <i>VANGL2</i>    | <i>ADAMTS1</i>   |
| <i>NLRC4</i>     | <i>PKP1</i>      |
| <i>B3GNT3</i>    | <i>MUC4</i>      |
| <i>C15orf42</i>  | <i>BUB1</i>      |
| <i>SCUBE1</i>    | <i>SYT7</i>      |
| <i>SMOC1</i>     | <i>KPNA2</i>     |
| <i>C6orf174</i>  | <i>LOXL2</i>     |

|                 |                 |
|-----------------|-----------------|
| <i>ROBO4</i>    | <i>GPRIN2</i>   |
| <i>ESYT3</i>    | <i>TMPRSS6</i>  |
| <i>FAP</i>      | <i>ABI3BP</i>   |
| <i>CSF3R</i>    | <i>PTGES</i>    |
| <i>C10orf10</i> | <i>GHR</i>      |
| <i>GMFG</i>     | <i>REEP6</i>    |
| <i>CRABP2</i>   | <i>CENPE</i>    |
| <i>RGMA</i>     | <i>TFF3</i>     |
| <i>DNAH9</i>    | <i>CDH3</i>     |
| <i>WFDC1</i>    | <i>EPN3</i>     |
| <i>TNFSF13</i>  | <i>MYBPC1</i>   |
| <i>RRAD</i>     | <i>MARCKSL1</i> |
| <i>VNN2</i>     | <i>ECT2</i>     |
| <i>SESN3</i>    | <i>CDA</i>      |
| <i>HOXB13</i>   | <i>SPOCK2</i>   |
| <i>CASS4</i>    | <i>GINS1</i>    |
| <i>PGC</i>      | <i>RAC3</i>     |
| <i>RBP1</i>     | <i>ADAM12</i>   |
| <i>NXPH4</i>    | <i>C10orf71</i> |
| <i>KRT19</i>    | <i>RAMP3</i>    |
| <i>CLEC14A</i>  | <i>EREG</i>     |
| <i>LY6D</i>     | <i>TPBG</i>     |
| <i>PSCA</i>     | <i>PSAT1</i>    |
| <i>CAMKV</i>    | <i>CFD</i>      |
| <i>EXO1</i>     | <i>GLIPR2</i>   |
| <i>PRX</i>      | <i>SEMA3A</i>   |
| <i>IGFBP3</i>   | <i>SLC16A9</i>  |
| <i>ESPNP</i>    | <i>MCM4</i>     |
| <i>ESPN</i>     | <i>THBS2</i>    |

|                 |                 |
|-----------------|-----------------|
| <i>FIGX</i>     | <i>GCLC</i>     |
| <i>FZD10</i>    | <i>SERPINE2</i> |
| <i>DUSP1</i>    | <i>GOLM1</i>    |
| <i>SCGB3A2</i>  | <i>C8orf84</i>  |
| <i>KIAA1462</i> | <i>BCL2L15</i>  |
| <i>PRR4</i>     | <i>CACNA2D2</i> |
| <i>ALDH2</i>    | <i>SLC17A9</i>  |
| <i>GKN2</i>     | <i>TESC</i>     |
| <i>IRF6</i>     | <i>COL5A2</i>   |
| <i>BARX2</i>    | <i>FHL2</i>     |
| <i>WISP1</i>    | <i>SOSTDC1</i>  |
| <i>FXYD1</i>    | <i>CHGB</i>     |
| <i>UHRF1</i>    | <i>LDB2</i>     |
| <i>EPR1</i>     | <i>SPTBN2</i>   |
| <i>BRCA1</i>    | <i>TUBB3</i>    |
| <i>PLEKHH2</i>  | <i>NDST4</i>    |
| <i>ABCA9</i>    | <i>TMEM132A</i> |
| <i>KANK3</i>    | <i>UPK1B</i>    |
| <i>PPAP2C</i>   | <i>DLGAP5</i>   |
| <i>ASPM</i>     | <i>SEMA6A</i>   |
| <i>C5orf13</i>  | <i>PAEP</i>     |
| <i>TMEM132A</i> | <i>DUSP4</i>    |
| <i>IL6</i>      | <i>CRABP2</i>   |
| <i>HIGD1B</i>   | <i>SC65</i>     |
| <i>DKK2</i>     | <i>FBXO32</i>   |
| <i>TMEM158</i>  | <i>SLC1A7</i>   |
| <i>TMEM20</i>   | <i>COL3A1</i>   |
| <i>KIF11</i>    | <i>SDPR</i>     |
| <i>NPPB</i>     | <i>CILP</i>     |



|                  |                 |
|------------------|-----------------|
| <i>ACADL</i>     | <i>SPN</i>      |
| <i>COL7A1</i>    | <i>PODXL2</i>   |
| <i>EMR1</i>      | <i>HIST1H1B</i> |
| <i>SGCA</i>      | <i>CRLF1</i>    |
| <i>CLCA2</i>     | <i>KIAA0101</i> |
| <i>PLOD2</i>     | <i>WDR62</i>    |
| <i>PANX2</i>     | <i>RNASE10</i>  |
| <i>PROM2</i>     | <i>NUF2</i>     |
| <i>CPLX3</i>     | <i>PLOD2</i>    |
| <i>ALOX5AP</i>   | <i>SULF1</i>    |
| <i>HPGDS</i>     | <i>UHRF1</i>    |
| <i>BNC1</i>      | <i>ANKRD29</i>  |
| <i>AADA3L3</i>   | <i>PEBP4</i>    |
| <i>SPC25</i>     | <i>GKN2</i>     |
| <i>RTP3</i>      | <i>RCN3</i>     |
| <i>B4GALT4</i>   | <i>HSPB8</i>    |
| <i>ANK2</i>      | <i>EYA2</i>     |
| <i>SERPINA12</i> | <i>DACHI</i>    |
| <i>B4GALNT4</i>  | <i>ALDH3A1</i>  |
| <i>CYBRD1</i>    | <i>PCDH9</i>    |
| <i>MCM8</i>      | <i>FAM83D</i>   |
| <i>ABCA6</i>     |                 |
| <i>CPLX2</i>     |                 |
| <i>LYVE1</i>     |                 |
| <i>C19orf45</i>  |                 |
| <i>WISP2</i>     |                 |
| <i>E2F2</i>      |                 |
| <i>DMBT1</i>     |                 |
| <i>AHNAK2</i>    |                 |

*MYBL2*  
*SPARCL1*  
*C20orf114*  
*C1orf94*  
*WFS1*  
*MMP13*  
*PTGES*  
*LY86*  
*LIFR*  
*C1orf157*  
*LYPD6B*  
*MFAP2*  
*PLD1*  
*PPP1R14A*  
*BTBD11*  
*DENND2A*  
*GALNT14*  
*SFTA1P*  
*BCL6B*  
*CXCL2*  
*CBX2*  
*THBS2*  
*ARHGAP29*  
*SLC2A1*  
*XKR7*  
*ITIH5*  
*LRRC46*  
*SPP1*  
*FAM57B*

*DSP*  
*ATP11A*  
*SELP*  
*PLEK2*  
*SUSD4*  
*VSIG2*  
*C13orf36*  
*MYBPC1*  
*C17orf53*  
*COX4I2*  
*HSPB7*  
*CA4*  
*FABP4*  
*C5orf4*  
*VSTM2B*  
*SPATA21*  
*C12orf77*  
*ATP1A2*  
*BIK*  
*CST1*  
*CSF3*  
*TGFA*  
*ADM2*  
*GPX3*  
*LOC153328*  
*TNNT1*  
*LRP8*  
*MTIM*  
*COBL*

*FABP3*

*FUT2*

*GJA4*

*HMGA2*

*NINJ2*

*SCTR*

*GCLM*

*ABCB6*

*RND1*

*SELE*

*SH3BP5*

*VIPRI*

*DOK2*

*C16orf89*

*PIGR*

*S100A2*

*C4orf31*

*ALG3*

*NDUFA4L2*

*LHX1*

*TMEM179*

*C4BPA*

*SCARA5*

*SLC38A8*

*NPM3*

*KRT13*

*AQP4*

*EPHB3*

*CCDC34*

*FGFBP2*

*SLC44A5*

*AURKB*

*CALML5*

*HMGAI*

*SGOL2*

*FANCI*

*CHI3L2*

*FAM83A*

*SPRR2A*

*CAPN3*

*SEMA3B*

*PEBP4*

*EGFR*

*VEPH1*

*MIF*

*DMP1*

*RHOV*

*ACTL6A*

*FABP7*

*DEFA4*

*RTKN2*

*3-Sep*

*C1QTNF7*

*CD55*

*LRRC36*

*EIF5A2*

*ECT2*

*PENK*

*KLF2*  
*KCNT2*  
*EZH2*  
*RAB17*  
*H19*  
*LIMCH1*  
*ABLIM3*  
*SPRR2D*  
*CADM1*  
*NR5A2*  
*FLRT3*  
*GLIPR2*  
*CYP27A1*  
*C6orf97*  
*DIO2*  
*TBR1*  
*COLEC12*  
*PREX2*  
*PRB2*  
*LOC84740*  
*S100A9*  
*RNASE4*  
*SYT10*  
*C7orf58*  
*S1PR5*  
*EMCN*  
*PECAM1*  
*SMO*  
*LRRN4*

*LRRC55*

*BMP7*

*AKR1C3*

*FMO5*

*SLC4A11*

*EIF4EBP1*

*SPRR3*

*XDH*

*TNFRSF10C*

*CYP26A1*

*RORC*

*TUBB2B*

*FGF11*

*GNG7*

*DLGAP5*

*KIF1A*

*TGFBR2*

*TNXB*

*SCN7A*

*RBP4*

*DSCC1*

*KRT23*

*RHOJ*

*FCN3*

*BPIL2*

*NEDD9*

*FAM107A*

*NTRK2*

*FOSB*

*GLYATL1*

*IL22RA1*

*PTPRN2*

*SLC6A20*

*SIX1*

*F2RL2*

*TTK*

*FHOD3*

*GIMAP7*

*PLA1A*

*PCSK2*

*CYB5A*

*STEAP4*

*FAM83C*

*HOPX*

*KIAA0101*

*BCL11A*

*SVEP1*

*CACNA1D*

*SOX14*

*GADD45B*

*CCNE1*

*FIGNL1*

*RHCG*

*NOTCH4*

*PLAU*

*VSIG10L*

*LST1*

*CNR1*



*ZNF703*  
*SERPINB7*  
*GLDN*  
*JAM2*  
*CD300C*  
*ST3GAL5*  
*SLIT3*  
*CGNLI*  
*FAM19A4*  
*ATP13A4*  
*EDARADD*  
*FAM84A*  
*NRIP3*  
*FAM83B*  
*ZNF385B*  
*SLC4A4*  
*HEPHL1*  
*LDB2*  
*KLF15*  
*TRPV2*  
*ALPL*  
*CD101*  
*ABI3BP*  
*SLC11A1*  
*ALOX15B*  
*GINS1*  
*SERPINB11*  
*LYPD3*  
*C13orf30*

*KLC3*  
*SCN4B*  
*SFTPC*  
*ROR1*  
*GIMAP4*  
*RHOBTB2*  
*GPA33*  
*HR*  
*ERO1L*  
*OSCAR*  
*SPOCK2*  
*NTN4*  
*NKX2-1*  
*TNS4*  
*MYCL1*  
*KRT80*  
*RNASE7*  
*SULF1*  
*PTGR1*  
*SBSN*  
*ADAMTSL3*  
*PRAMI*  
*TPBG*  
*PODXL2*  
*PGBD5*  
*CLDN5*  
*CAPN8*  
*PLK1*  
*AQP9*

*IL1RL1*  
*NOS2*  
*RASSF6*  
*RAD54L*  
*KNDC1*  
*CRTAC1*  
*GPRC5A*  
*NCCRP1*  
*ABCC5*  
*GSTM2*  
*SIX2*  
*LRRC32*  
*CNTNAP2*  
*C11orf93*  
*HES2*  
*SC65*  
*ARC*  
*FETUB*  
*IGFL1*  
*RASGEF1C*  
*BSND*  
*CCL19*  
*CPM*  
*CLDN17*  
*PHGDH*  
*BAI2*  
*TCF21*  
*USHBP1*  
*ATOH8*

*SOD3*

*PIP5K1B*

*PRG4*

*C1orf88*

*NPRI*

*LRP2BP*

*ADAMDEC1*

*FJX1*

*SLC6A15*

*COL9A2*

*SYNE1*

*RAMP3*

*PMAIP1*

*COL3A1*

*FOXM1*

*TGM3*

*CFD*

*ARHGEF15*

*NLRP10*

*UPK1B*

*MEX3A*

*CLCN2*

*LAMA1*

*PLCH2*

*IGF2BP1*

*SGMS2*

*VWF*

*KRT14*

*MYCT1*

*ALDH1A2*

*RAC3*

*ATOH7*

*PCDP1*

*FRY*

*NUDT1*

*COL5A2*

*CHEK1*

*PLA2G4F*

*RPL3L*

*SLC39A8*

*AOX1*

*LGR5*

*MCM4*

*TEKT1*

*CLDN10*

*RAD54B*

*CNTN6*

*ITGB8*

*GIMAP1*

*CDT1*

*SFTPD*

*FANCA*

*SERPINA1*

*GNA14*

*FGFBP1*

*SORBS2*

*E2F7*

*CDK1*

*C1orf173*  
*FSCN1*  
*SLC46A2*  
*PRRX2*  
*FBXO32*  
*TSPAN12*  
*FOXF1*  
*PADI3*  
*ZFP36*  
*SLC44A4*  
*MAPK8IP2*  
*ITLN2*  
*ANGPT1*  
*MS4A2*  
*CXCL14*  
*SOX9*  
*CYB5R2*  
*DRAM1*  
*AKR1C4*  
*SNTN*  
*CTSH*  
*CYP2B7P1*  
*DEFB1*  
*PVRL1*  
*KRT1*  
*DEPDC1B*  
*C8B*  
*MMP12*  
*RASGRF1*

*SLCO4C1*

*LPL*

*ESPL1*

*ETNK2*

*SPOCK1*

*MFI2*

*AIM1L*

*SCG2*

*CD69*

*MIAT*

*SCGB1A1*

*ACRV1*

*CCDC48*

*NQO1*

*SYT15*

*SRXN1*

*DCDC2*

*KRT31*

*GPR115*

*DNAH17*

*SERPINB2*

*STRA6*

*RPS6KA2*

*LIMS2*

*SLC2A5*

*LRRK2*

*ICAM4*

*TIMELESS*

*KIF23*

*FBN2*  
*FST*  
*DEPDC1*  
*CDCA4*  
*SPRR1B*  
*RECQL4*  
*GJB2*  
*FAM105A*  
*FMO2*  
*MCM2*  
*GINS3*  
*ANKRD1*  
*KIF18B*  
*MAD2L1*  
*BDH1*  
*PTHLH*  
*NIPAL4*  
*GPRIN2*  
*SEMA3G*  
*KRT76*  
*MS4A15*  
*C10orf79*  
*SLIT2*  
*CDC6*  
*SSTR1*  
*LMNB2*  
*C11orf88*  
*BTNL9*  
*TMEM139*



*TCHHL1*  
*SLC16A9*  
*HBA2*  
*LGALS7*  
*AKR1B10*  
*TRIP13*  
*CD97*  
*KRT83*  
*PAICS*  
*HPGD*  
*RASL12*  
*TRIM7*  
*ITLN1*  
*C2orf39*  
*SLC4A3*  
*ZP1*  
*TREMI*  
*EPHB2*  
*TUBB3*  
*MLF1IP*  
*FGB*  
*CAT*  
*PKNOX2*  
*AGR3*  
*PFN2*  
*EYA2*  
*NR2F1*  
*CDKN3*  
*FBLN5*

*TMEM117*

*IGF2BP2*

*GATA6*

*KCNC1*

*FBP1*

*RAB38*

*UGT8*

*GYLTL1B*

*BUB1*

*ANXA3*

*LOXL2*

*PID1*

*SEMA3E*

*WSCD1*

*SULF2*

*HAP1*

*SFTPA1*

*MMP9*

*NTN3*

*KIF26B*

*SLC6A4*

*DNAH10*

*CELSR2*

*SERPINE2*

*ACOXL*

*ACE*

*POM121L2*

*CDH2*

*GPT2*

*WNK2*

*CPA2*

*NGFR*

*NCAPD2*

*TBX2*

*MMP10*

*GRHL1*

*CAVI*

*SUSD2*

*DPYSL2*

*C8orf4*

*NR3C2*

*C7orf52*

*TNNC1*

---

Table SVI. Result of instrument variable analysis in lung adenocarcinoma.

| Gene             | $\beta$   | HR       | P-value               | lower.95 | upper.95 | test.ph  | FDR      |
|------------------|-----------|----------|-----------------------|----------|----------|----------|----------|
| <i>ARNTL2</i>    | 0.0358597 | 1.03651  | $1.81 \times 10^{-4}$ | 1.017232 | 1.056155 | 0.623437 | 0.028794 |
| <i>SEMA3G</i>    | -0.459095 | 0.631855 | $6.79 \times 10^{-5}$ | 0.504102 | 0.791985 | 0.763674 | 0.028794 |
| <i>SDPR</i>      | -0.020534 | 0.979675 | $1.38 \times 10^{-4}$ | 0.969384 | 0.990076 | 0.930034 | 0.028794 |
| <i>CLIC5</i>     | -0.012767 | 0.987314 | $7.39 \times 10^{-4}$ | 0.980021 | 0.994662 | 0.773579 | 0.070356 |
| <i>LIMS2</i>     | -0.078548 | 0.924458 | $6.22 \times 10^{-4}$ | 0.883788 | 0.966999 | 0.605223 | 0.070356 |
| <i>EMP2</i>      | -0.002848 | 0.997156 | $2.52 \times 10^{-3}$ | 0.995316 | 0.999    | 0.886507 | 0.150464 |
| <i>CA7</i>       | -20.43305 | 0.000000 | $2.53 \times 10^{-3}$ | 0.000000 | 0.000768 | 0.600655 | 0.150464 |
| <i>LOC116437</i> | -1.956454 | 0.141359 | $2.25 \times 10^{-3}$ | 0.040299 | 0.495849 | 0.728219 | 0.150464 |
| <i>TBX4</i>      | -0.057964 | 0.943684 | $5.28 \times 10^{-3}$ | 0.906024 | 0.982909 | 0.618103 | 0.221727 |
| <i>TFAP2A</i>    | 0.0239482 | 1.024237 | $5.49 \times 10^{-3}$ | 1.007068 | 1.041699 | 0.685912 | 0.221727 |
| <i>ODZ4</i>      | -0.052329 | 0.949016 | $5.77 \times 10^{-3}$ | 0.914403 | 0.984941 | 0.981998 | 0.221727 |
| <i>CYP4B1</i>    | -0.004007 | 0.996001 | $4.40 \times 10^{-3}$ | 0.993258 | 0.998752 | 0.874122 | 0.221727 |
| <i>EIF4E1B</i>   | 0.9422133 | 2.565654 | $6.06 \times 10^{-3}$ | 1.309181 | 5.028012 | 0.832161 | 0.221727 |
| <i>MYEOV</i>     | 0.0068736 | 1.006897 | $9.04 \times 10^{-3}$ | 1.001714 | 1.012107 | 0.858564 | 0.239046 |
| <i>PHOX2B</i>    | -0.360669 | 0.69721  | $7.85 \times 10^{-3}$ | 0.534415 | 0.909596 | 0.823824 | 0.239046 |

|                |           |          |                       |          |          |          |          |
|----------------|-----------|----------|-----------------------|----------|----------|----------|----------|
| <i>DUOX1</i>   | -0.007837 | 0.992194 | 8.66x10 <sup>-3</sup> | 0.986406 | 0.998016 | 0.663412 | 0.239046 |
| <i>ECT2</i>    | 0.0081722 | 1.008206 | 8.41x10 <sup>-3</sup> | 1.002096 | 1.014353 | 0.900131 | 0.239046 |
| <i>PEBP4</i>   | -0.017642 | 0.982513 | 7.99x10 <sup>-3</sup> | 0.969787 | 0.995405 | 0.919358 | 0.239046 |
| <i>IGFL3</i>   | 4.1892247 | 65.97162 | 9.60x10 <sup>-3</sup> | 2.770648 | 1570.844 | 0.870367 | 0.240432 |
| <i>CDCA7</i>   | -0.0347   | 0.965895 | 1.19x10 <sup>-2</sup> | 0.940126 | 0.992371 | 0.892137 | 0.260311 |
| <i>SLC46A2</i> | -0.017503 | 0.982649 | 1.20x10 <sup>-2</sup> | 0.969317 | 0.996165 | 0.672831 | 0.260311 |
| <i>LRRC32</i>  | -0.054871 | 0.946608 | 1.13x10 <sup>-2</sup> | 0.907241 | 0.987682 | 0.782228 | 0.260311 |
| <i>CRYAB</i>   | -0.057742 | 0.943894 | 1.45x10 <sup>-2</sup> | 0.901199 | 0.988611 | 0.905775 | 0.299814 |
| <i>ZBTB16</i>  | -0.123002 | 0.884262 | 1.68x10 <sup>-2</sup> | 0.799448 | 0.978073 | 0.795076 | 0.333317 |
| <i>DPEP2</i>   | -0.113747 | 0.892484 | 1.89x10 <sup>-2</sup> | 0.811625 | 0.981399 | 0.690168 | 0.339248 |
| <i>CCDC85A</i> | -0.074663 | 0.928056 | 1.92x10 <sup>-2</sup> | 0.871814 | 0.987926 | 0.901366 | 0.339248 |
| <i>SFTPC</i>   | -0.00025  | 0.99975  | 1.79x10 <sup>-2</sup> | 0.999542 | 0.999957 | 0.645792 | 0.339248 |
| <i>GKN2</i>    | -0.008994 | 0.991046 | 2.01x10 <sup>-2</sup> | 0.983559 | 0.99859  | 0.639316 | 0.341647 |
| <i>TCF21</i>   | -0.038801 | 0.961942 | 2.30x10 <sup>-2</sup> | 0.930304 | 0.994656 | 0.806756 | 0.376973 |
| <i>ABPI</i>    | -0.004322 | 0.995687 | 2.46x10 <sup>-2</sup> | 0.991943 | 0.999446 | 0.991381 | 0.377012 |
| <i>ADAMTS1</i> | -0.020336 | 0.979869 | 2.44x10 <sup>-2</sup> | 0.962673 | 0.997373 | 0.776024 | 0.377012 |
| <i>FAM162B</i> | -0.657806 | 0.517986 | 2.68x10 <sup>-2</sup> | 0.289397 | 0.927136 | 0.834232 | 0.398387 |

|                |           |          |                       |          |          |          |          |
|----------------|-----------|----------|-----------------------|----------|----------|----------|----------|
| <i>MDGA2</i>   | 0.4173545 | 1.51794  | 3.10x10 <sup>-2</sup> | 1.038782 | 2.218121 | 0.884079 | 0.434549 |
| <i>CNTN6</i>   | -0.177791 | 0.837117 | 3.07x10 <sup>-2</sup> | 0.712419 | 0.983643 | 0.843845 | 0.434549 |
| <i>IGF2BP3</i> | 0.0060297 | 1.006048 | 3.23x10 <sup>-2</sup> | 1.00051  | 1.011617 | 0.944993 | 0.439066 |
| <i>NECAB1</i>  | -0.124638 | 0.882816 | 3.61x10 <sup>-2</sup> | 0.785682 | 0.991959 | 0.80248  | 0.475128 |
| <i>DUSP4</i>   | -0.007037 | 0.992988 | 3.69x10 <sup>-2</sup> | 0.986445 | 0.999573 | 0.866926 | 0.475128 |
| <i>CA3</i>     | -0.134693 | 0.873984 | 4.18x10 <sup>-2</sup> | 0.767658 | 0.995037 | 0.901881 | 0.504515 |
| <i>RRM2</i>    | 0.0066801 | 1.006702 | 4.65x10 <sup>-2</sup> | 1.000104 | 1.013344 | 0.918297 | 0.504515 |
| <i>AFF3</i>    | -0.018451 | 0.981718 | 4.41x10 <sup>-2</sup> | 0.964241 | 0.999513 | 0.814939 | 0.504515 |
| <i>COL17A1</i> | 0.0015525 | 1.001554 | 4.56x10 <sup>-2</sup> | 1.000031 | 1.003079 | 0.890626 | 0.504515 |
| <i>KCNN4</i>   | 0.0084455 | 1.008481 | 4.43x10 <sup>-2</sup> | 1.000213 | 1.016817 | 0.720085 | 0.504515 |
| <i>MTIM</i>    | -0.167141 | 0.846081 | 4.66x10 <sup>-2</sup> | 0.717636 | 0.997514 | 0.757863 | 0.504515 |
| <i>PLA2G1B</i> | -0.074445 | 0.928259 | 4.64x10 <sup>-2</sup> | 0.862701 | 0.998798 | 0.94658  | 0.504515 |
| <i>PRC1</i>    | 0.0129866 | 1.013071 | 4.99x10 <sup>-2</sup> | 1.000007 | 1.026306 | 0.966846 | 0.505058 |
| <i>LYVE1</i>   | -0.081313 | 0.921905 | 4.88x10 <sup>-2</sup> | 0.850277 | 0.999567 | 0.707353 | 0.505058 |
| <i>CAV2</i>    | -0.009478 | 0.990567 | 4.94x10 <sup>-2</sup> | 0.981245 | 0.999977 | 0.699231 | 0.505058 |
| <i>GLIPR2</i>  | 0.2286765 | 1.256935 | 5.12x10 <sup>-2</sup> | 0.998841 | 1.581719 | 0.732526 | 0.507406 |
| <i>EPRI</i>    | 0.0260493 | 1.026392 | 5.40x10 <sup>-2</sup> | 0.999555 | 1.053949 | 0.971879 | 0.513851 |

|                  |           |          |                       |          |          |          |          |
|------------------|-----------|----------|-----------------------|----------|----------|----------|----------|
| <i>LOC284798</i> | -0.554132 | 0.574571 | 5.38x10 <sup>-2</sup> | 0.327146 | 1.009126 | 0.700729 | 0.513851 |
| <i>VIPRI</i>     | 0.1352213 | 1.14479  | 5.56x10 <sup>-2</sup> | 0.996769 | 1.314793 | 0.741953 | 0.518942 |
| <i>COL7A1</i>    | -0.497765 | 0.607888 | 5.69x10 <sup>-2</sup> | 0.364134 | 1.014813 | 0.629741 | 0.521275 |
| <i>PVRL4</i>     | -0.006124 | 0.993894 | 6.09x10 <sup>-2</sup> | 0.98755  | 1.00028  | 0.839648 | 0.546885 |
| <i>HTR3A</i>     | -0.085803 | 0.917775 | 6.27x10 <sup>-2</sup> | 0.838496 | 1.00455  | 0.645182 | 0.552481 |
| <i>MSMP</i>      | -0.011688 | 0.98838  | 6.45x10 <sup>-2</sup> | 0.976208 | 1.000704 | 0.970523 | 0.558296 |
| <i>LOC149620</i> | -0.291451 | 0.747179 | 6.62x10 <sup>-2</sup> | 0.547499 | 1.019683 | 0.869553 | 0.56266  |
| <i>KRT15</i>     | -0.002827 | 0.997177 | 6.91x10 <sup>-2</sup> | 0.994142 | 1.000222 | 0.541127 | 0.573631 |
| <i>SLC1A7</i>    | 0.0340066 | 1.034591 | 6.99x10 <sup>-2</sup> | 0.997239 | 1.073343 | 0.65177  | 0.573631 |
| <i>LYPD1</i>     | 0.0460591 | 1.047136 | 7.58x10 <sup>-2</sup> | 0.995223 | 1.101757 | 0.606757 | 0.578034 |
| <i>CALCA</i>     | -0.000149 | 0.999851 | 7.62x10 <sup>-2</sup> | 0.999686 | 1.000016 | 0.728598 | 0.578034 |
| <i>SLC4A11</i>   | -0.020784 | 0.979431 | 7.43x10 <sup>-2</sup> | 0.957331 | 1.002041 | 0.962272 | 0.578034 |
| <i>ITLN2</i>     | -0.300806 | 0.740222 | 7.98x10 <sup>-2</sup> | 0.528669 | 1.03643  | 0.701954 | 0.578034 |
| <i>SOX11</i>     | -0.02047  | 0.979738 | 8.01x10 <sup>-2</sup> | 0.957536 | 1.002455 | 0.842475 | 0.578034 |
| <i>PCSK2</i>     | -0.000887 | 0.999114 | 7.68x10 <sup>-2</sup> | 0.998133 | 1.000095 | 0.769115 | 0.578034 |
| <i>AQP4</i>      | -0.003682 | 0.996325 | 8.01x10 <sup>-2</sup> | 0.992224 | 1.000442 | 0.776486 | 0.578034 |
| <i>SYT7</i>      | 0.0046077 | 1.004618 | 7.47x10 <sup>-2</sup> | 0.999542 | 1.009721 | 0.681673 | 0.578034 |

|                  |           |          |                       |          |          |          |          |
|------------------|-----------|----------|-----------------------|----------|----------|----------|----------|
| <i>SYT12</i>     | 0.3941482 | 1.48312  | 8.33x10 <sup>-2</sup> | 0.949447 | 2.316764 | 0.527887 | 0.591604 |
| <i>LOC283404</i> | 1.6593475 | 5.25588  | 8.69x10 <sup>-2</sup> | 0.786519 | 35.12221 | 0.534887 | 0.594126 |
| <i>SLC14A1</i>   | -0.233397 | 0.791839 | 8.86x10 <sup>-2</sup> | 0.605286 | 1.035889 | 0.978754 | 0.594126 |
| <i>TNSI</i>      | -0.026347 | 0.973997 | 8.74x10 <sup>-2</sup> | 0.94501  | 1.003874 | 0.891312 | 0.594126 |
| <i>TESC</i>      | 0.0020624 | 1.002065 | 8.52x10 <sup>-2</sup> | 0.999714 | 1.004421 | 0.751279 | 0.594126 |
| <i>PEAR1</i>     | -0.066607 | 0.935563 | 1.02x10 <sup>-1</sup> | 0.863723 | 1.013378 | 0.862189 | 0.601754 |
| <i>KRT80</i>     | -0.017096 | 0.983049 | 1.01x10 <sup>-1</sup> | 0.963193 | 1.003315 | 0.7255   | 0.601754 |
| <i>AVPR1B</i>    | -3.370206 | 0.034383 | 9.98x10 <sup>-2</sup> | 0.000621 | 1.902472 | 0.724516 | 0.601754 |
| <i>SOX7</i>      | -0.054666 | 0.946801 | 1.00x10 <sup>-1</sup> | 0.887061 | 1.010565 | 0.764926 | 0.601754 |
| <i>BMPER</i>     | -0.101416 | 0.903557 | 9.71x10 <sup>-2</sup> | 0.801547 | 1.01855  | 0.591889 | 0.601754 |
| <i>FNDC4</i>     | 0.093209  | 1.097691 | 9.95x10 <sup>-2</sup> | 0.982473 | 1.226422 | 0.476723 | 0.601754 |
| <i>MFAP4</i>     | -0.002885 | 0.997119 | 1.02x10 <sup>-1</sup> | 0.993674 | 1.000577 | 0.570464 | 0.601754 |
| <i>TUBB2B</i>    | -0.013231 | 0.986856 | 9.17x10 <sup>-2</sup> | 0.971799 | 1.002146 | 0.779763 | 0.601754 |
| <i>DNASE1L3</i>  | -1.191627 | 0.303727 | 9.23x10 <sup>-2</sup> | 0.075839 | 1.216396 | 0.596977 | 0.601754 |
| <i>CCDC48</i>    | 0.447498  | 1.564393 | 1.05x10 <sup>-1</sup> | 0.910797 | 2.687017 | 0.786776 | 0.601754 |
| <i>IGSF10</i>    | -0.030204 | 0.970248 | 1.03x10 <sup>-1</sup> | 0.93566  | 1.006114 | 0.584095 | 0.601754 |
| <i>BARX2</i>     | 0.0388389 | 1.039603 | 1.05x10 <sup>-1</sup> | 0.991942 | 1.089554 | 0.872647 | 0.601754 |



|                 |           |          |                       |          |          |          |          |
|-----------------|-----------|----------|-----------------------|----------|----------|----------|----------|
| <i>KC6</i>      | -0.382655 | 0.682048 | 1.06x10 <sup>-1</sup> | 0.428729 | 1.085043 | 0.813883 | 0.601936 |
| <i>DLX2</i>     | -2.254729 | 0.104902 | 1.09x10 <sup>-1</sup> | 0.006673 | 1.649123 | 0.911194 | 0.608704 |
| <i>FOXE3</i>    | -1.53465  | 0.215531 | 1.11x10 <sup>-1</sup> | 0.032644 | 1.42302  | 0.865884 | 0.614483 |
| <i>KCNK3</i>    | -0.014694 | 0.985414 | 1.12x10 <sup>-1</sup> | 0.967697 | 1.003455 | 0.831073 | 0.615093 |
| <i>KL</i>       | -0.019363 | 0.980823 | 1.15x10 <sup>-1</sup> | 0.957479 | 1.004736 | 0.704073 | 0.615763 |
| <i>WISP1</i>    | 0.1654713 | 1.179949 | 1.15x10 <sup>-1</sup> | 0.960472 | 1.449578 | 0.61661  | 0.615763 |
| <i>CLEC1A</i>   | -0.517902 | 0.595769 | 1.17x10 <sup>-1</sup> | 0.311612 | 1.139048 | 0.881239 | 0.620352 |
| <i>SULF1</i>    | -0.003555 | 0.996451 | 1.20x10 <sup>-1</sup> | 0.991995 | 1.000927 | 0.738186 | 0.627763 |
| <i>ADCY4</i>    | -0.055108 | 0.946383 | 1.37x10 <sup>-1</sup> | 0.880024 | 1.017746 | 0.650541 | 0.660411 |
| <i>NOTO</i>     | -0.53275  | 0.586989 | 1.33x10 <sup>-1</sup> | 0.292897 | 1.176372 | 0.943584 | 0.660411 |
| <i>CCL14</i>    | -0.033572 | 0.966986 | 1.30x10 <sup>-1</sup> | 0.925851 | 1.009947 | 0.890978 | 0.660411 |
| <i>DKK2</i>     | 0.1280586 | 1.13662  | 1.37x10 <sup>-1</sup> | 0.95998  | 1.345761 | 0.804246 | 0.660411 |
| <i>SYT15</i>    | -0.030214 | 0.970237 | 1.30x10 <sup>-1</sup> | 0.93305  | 1.008907 | 0.564415 | 0.660411 |
| <i>AHNAK2</i>   | 0.0049001 | 1.004912 | 1.37x10 <sup>-1</sup> | 0.998437 | 1.011429 | 0.798033 | 0.660411 |
| <i>MARCKSL1</i> | -0.002511 | 0.997492 | 1.35x10 <sup>-1</sup> | 0.994214 | 1.00078  | 0.734406 | 0.660411 |
| <i>SERPINE2</i> | 0.0188071 | 1.018985 | 1.36x10 <sup>-1</sup> | 0.994099 | 1.044494 | 0.676019 | 0.660411 |
| <i>CIQTNF7</i>  | -0.669198 | 0.512119 | 1.40x10 <sup>-1</sup> | 0.21057  | 1.245506 | 0.848101 | 0.666387 |

|                |           |          |                       |          |          |          |          |
|----------------|-----------|----------|-----------------------|----------|----------|----------|----------|
| <i>CAVI</i>    | 0.0009463 | 1.000947 | 1.51x10 <sup>-1</sup> | 0.999654 | 1.002241 | 0.707722 | 0.673094 |
| <i>OR56A3</i>  | -1.57759  | 0.206472 | 1.49x10 <sup>-1</sup> | 0.024291 | 1.755022 | 0.823251 | 0.673094 |
| <i>IGSF9</i>   | 0.0157763 | 1.015901 | 1.44x10 <sup>-1</sup> | 0.994623 | 1.037635 | 0.411128 | 0.673094 |
| <i>CSF3</i>    | -0.091773 | 0.912312 | 1.48x10 <sup>-1</sup> | 0.805552 | 1.03322  | 0.649966 | 0.673094 |
| <i>HBEGF</i>   | 0.0702452 | 1.072771 | 1.50x10 <sup>-1</sup> | 0.974812 | 1.180575 | 0.795376 | 0.673094 |
| <i>OLR1</i>    | 0.0478418 | 1.049005 | 1.47x10 <sup>-1</sup> | 0.983299 | 1.119101 | 0.964573 | 0.673094 |
| <i>REEP6</i>   | -0.074731 | 0.927993 | 1.51x10 <sup>-1</sup> | 0.837943 | 1.02772  | 0.802128 | 0.673094 |
| <i>TFF2</i>    | -0.000558 | 0.999442 | 1.59x10 <sup>-1</sup> | 0.998665 | 1.00022  | 0.698985 | 0.696378 |
| <i>GPX3</i>    | -0.006399 | 0.993622 | 1.59x10 <sup>-1</sup> | 0.984824 | 1.002499 | 0.563057 | 0.696378 |
| <i>ECSCR</i>   | -0.069709 | 0.932665 | 1.68x10 <sup>-1</sup> | 0.844583 | 1.029934 | 0.741428 | 0.709527 |
| <i>STXBP6</i>  | -0.123113 | 0.884164 | 1.68x10 <sup>-1</sup> | 0.742114 | 1.053405 | 0.72585  | 0.709527 |
| <i>GIMAP8</i>  | -0.073255 | 0.929363 | 1.65x10 <sup>-1</sup> | 0.837994 | 1.030695 | 0.705343 | 0.709527 |
| <i>ANKRD29</i> | -0.037327 | 0.963361 | 1.68x10 <sup>-1</sup> | 0.913624 | 1.015806 | 0.724565 | 0.709527 |
| <i>PKP1</i>    | -0.002901 | 0.997103 | 1.70x10 <sup>-1</sup> | 0.992978 | 1.001245 | 0.815793 | 0.710358 |
| <i>TAL1</i>    | -0.10778  | 0.897825 | 1.74x10 <sup>-1</sup> | 0.768524 | 1.048881 | 0.860889 | 0.72153  |
| <i>GREM1</i>   | -0.006784 | 0.993239 | 1.87x10 <sup>-1</sup> | 0.983284 | 1.003296 | 0.822535 | 0.724592 |
| <i>SELE</i>    | -0.189395 | 0.82746  | 1.78x10 <sup>-1</sup> | 0.628263 | 1.089814 | 0.861884 | 0.724592 |

|               |           |          |                       |          |          |          |          |
|---------------|-----------|----------|-----------------------|----------|----------|----------|----------|
| <i>ADM2</i>   | 0.0501616 | 1.051441 | 1.82x10 <sup>-1</sup> | 0.97675  | 1.131844 | 0.802965 | 0.724592 |
| <i>PITX1</i>  | -0.010392 | 0.989662 | 1.87x10 <sup>-1</sup> | 0.974495 | 1.005065 | 0.628891 | 0.724592 |
| <i>ALOX15</i> | -0.02371  | 0.976569 | 1.82x10 <sup>-1</sup> | 0.943159 | 1.011163 | 0.543037 | 0.724592 |
| <i>PLEK2</i>  | 0.0144423 | 1.014547 | 1.81x10 <sup>-1</sup> | 0.993296 | 1.036253 | 0.915397 | 0.724592 |
| <i>ERO1L</i>  | 0.0016118 | 1.001613 | 1.86x10 <sup>-1</sup> | 0.999226 | 1.004006 | 0.853132 | 0.724592 |
| <i>DACH1</i>  | -0.087545 | 0.916177 | 1.83x10 <sup>-1</sup> | 0.805366 | 1.042236 | 0.717411 | 0.724592 |
| <i>MUC21</i>  | -0.001049 | 0.998952 | 1.89x10 <sup>-1</sup> | 0.997389 | 1.000518 | 0.713083 | 0.727034 |
| <i>GJB3</i>   | 0.0064363 | 1.006457 | 1.95x10 <sup>-1</sup> | 0.996707 | 1.016303 | 0.878799 | 0.737018 |
| <i>RET</i>    | -0.010851 | 0.989208 | 1.95x10 <sup>-1</sup> | 0.973103 | 1.005579 | 0.820142 | 0.737018 |
| <i>PRAME</i>  | 0.0022466 | 1.002249 | 1.97x10 <sup>-1</sup> | 0.998835 | 1.005675 | 0.930415 | 0.737817 |
| <i>RTL1</i>   | 0.294489  | 1.34244  | 2.04x10 <sup>-1</sup> | 0.852584 | 2.113746 | 0.76369  | 0.740747 |
| <i>ATOH7</i>  | -1.215969 | 0.296423 | 2.01x10 <sup>-1</sup> | 0.045941 | 1.912581 | 0.708942 | 0.740747 |
| <i>DKK1</i>   | 0.0063446 | 1.006365 | 2.02x10 <sup>-1</sup> | 0.996612 | 1.016213 | 0.67283  | 0.740747 |
| <i>CRABP2</i> | -0.006011 | 0.994007 | 2.04x10 <sup>-1</sup> | 0.984833 | 1.003266 | 0.629988 | 0.740747 |
| <i>DLC1</i>   | -0.001872 | 0.998129 | 2.07x10 <sup>-1</sup> | 0.995234 | 1.001033 | 0.828279 | 0.744291 |
| <i>CLDN18</i> | -0.001222 | 0.998779 | 2.08x10 <sup>-1</sup> | 0.996882 | 1.00068  | 0.645924 | 0.744291 |
| <i>SMAD6</i>  | -0.038075 | 0.96264  | 2.14x10 <sup>-1</sup> | 0.906535 | 1.022218 | 0.911846 | 0.749687 |

|                 |           |          |                       |          |          |          |          |
|-----------------|-----------|----------|-----------------------|----------|----------|----------|----------|
| <i>TMEM100</i>  | -0.025506 | 0.974816 | 2.13x10 <sup>-1</sup> | 0.936495 | 1.014706 | 0.810245 | 0.749687 |
| <i>CILP</i>     | -0.053823 | 0.9476   | 2.14x10 <sup>-1</sup> | 0.870444 | 1.031595 | 0.884364 | 0.749687 |
| <i>DSP</i>      | 0.0007719 | 1.000772 | 2.16x10 <sup>-1</sup> | 0.999549 | 1.001997 | 0.796469 | 0.75118  |
| <i>GIN51</i>    | 0.0085695 | 1.008606 | 2.20x10 <sup>-1</sup> | 0.994891 | 1.022511 | 0.786473 | 0.758593 |
| <i>HOXC12</i>   | 0.4488001 | 1.566432 | 2.22x10 <sup>-1</sup> | 0.762778 | 3.216806 | 0.91177  | 0.758699 |
| <i>ADAMTS20</i> | 0.262114  | 1.299675 | 2.29x10 <sup>-1</sup> | 0.847886 | 1.992194 | 0.942649 | 0.773288 |
| <i>JAM2</i>     | -0.157475 | 0.854298 | 2.28x10 <sup>-1</sup> | 0.661403 | 1.10345  | 0.75471  | 0.773288 |
| <i>C13orf36</i> | -0.308856 | 0.734287 | 2.33x10 <sup>-1</sup> | 0.442036 | 1.21976  | 0.892457 | 0.775723 |
| <i>EDN2</i>     | 0.0263992 | 1.026751 | 2.33x10 <sup>-1</sup> | 0.983156 | 1.072279 | 0.701683 | 0.775723 |
| <i>CDT1</i>     | 0.1145693 | 1.12139  | 2.39x10 <sup>-1</sup> | 0.926543 | 1.357214 | 0.728397 | 0.785878 |
| <i>BHMT2</i>    | -0.004851 | 0.995161 | 2.39x10 <sup>-1</sup> | 0.987161 | 1.003226 | 0.630161 | 0.785878 |
| <i>C17orf93</i> | 0.7852227 | 2.192895 | 2.48x10 <sup>-1</sup> | 0.579484 | 8.298395 | 0.817822 | 0.786518 |
| <i>ASCL1</i>    | 0.0012386 | 1.001239 | 2.46x10 <sup>-1</sup> | 0.999147 | 1.003336 | 0.781904 | 0.786518 |
| <i>EPAS1</i>    | -0.001289 | 0.998712 | 2.47x10 <sup>-1</sup> | 0.996534 | 1.000895 | 0.750322 | 0.786518 |
| <i>FA2H</i>     | -0.019362 | 0.980825 | 2.49x10 <sup>-1</sup> | 0.949051 | 1.013662 | 0.760279 | 0.786518 |
| <i>CEACAM5</i>  | 0.000094  | 1.000094 | 2.50x10 <sup>-1</sup> | 0.999934 | 1.000253 | 0.666198 | 0.786518 |
| <i>HIGD1B</i>   | 0.4499232 | 1.568192 | 2.44x10 <sup>-1</sup> | 0.735275 | 3.344633 | 0.617739 | 0.786518 |

|                  |           |             |                       |          |                              |          |          |
|------------------|-----------|-------------|-----------------------|----------|------------------------------|----------|----------|
| <i>DARC</i>      | -0.015076 | 0.985037    | 2.53x10 <sup>-1</sup> | 0.959904 | 1.010828                     | 0.925344 | 0.786862 |
| <i>UBE2U</i>     | 19.372785 | 259115538.4 | 2.53x10 <sup>-1</sup> | 0.000001 | 676000000000<br>000000000000 | 0.772995 | 0.786862 |
| <i>KIF1A</i>     | -0.002267 | 0.997735    | 2.63x10 <sup>-1</sup> | 0.993785 | 1.001701                     | 0.737197 | 0.787284 |
| <i>MME</i>       | 0.0089966 | 1.009037    | 2.61x10 <sup>-1</sup> | 0.993348 | 1.024975                     | 0.762941 | 0.787284 |
| <i>IGFBP3</i>    | -0.000779 | 0.999222    | 2.65x10 <sup>-1</sup> | 0.997856 | 1.00059                      | 0.632465 | 0.787284 |
| <i>SLC6A3</i>    | -0.008721 | 0.991317    | 2.64x10 <sup>-1</sup> | 0.976252 | 1.006615                     | 0.826589 | 0.787284 |
| <i>ADH1B</i>     | 0.0056876 | 1.005704    | 2.59x10 <sup>-1</sup> | 0.995826 | 1.015679                     | 0.978912 | 0.787284 |
| <i>HOXB7</i>     | 0.0098452 | 1.009894    | 2.62x10 <sup>-1</sup> | 0.992676 | 1.02741                      | 0.738482 | 0.787284 |
| <i>UGT8</i>      | 0.0156551 | 1.015778    | 2.58x10 <sup>-1</sup> | 0.988602 | 1.043702                     | 0.904479 | 0.787284 |
| <i>ADAMTSL4</i>  | 0.0145012 | 1.014607    | 2.71x10 <sup>-1</sup> | 0.988772 | 1.041117                     | 0.776154 | 0.79974  |
| <i>LOC645323</i> | 0.4249431 | 1.529503    | 3.26x10 <sup>-1</sup> | 0.65556  | 3.568524                     | 0.678929 | 0.808628 |
| <i>NKX2-4</i>    | -0.084557 | 0.91892     | 3.21x10 <sup>-1</sup> | 0.777543 | 1.086002                     | 0.796475 | 0.808628 |
| <i>C1orf106</i>  | 0.0017189 | 1.00172     | 3.39x10 <sup>-1</sup> | 0.998194 | 1.00526                      | 0.759625 | 0.808628 |
| <i>IL6</i>       | -0.014855 | 0.985254    | 3.31x10 <sup>-1</sup> | 0.956206 | 1.015185                     | 0.804837 | 0.808628 |
| <i>KLK9</i>      | 0.907915  | 2.479148    | 3.13x10 <sup>-1</sup> | 0.424768 | 14.46949                     | 0.689721 | 0.808628 |
| <i>IVL</i>       | -0.009037 | 0.991004    | 2.85x10 <sup>-1</sup> | 0.974713 | 1.007567                     | 0.84643  | 0.808628 |

|                 |           |          |                       |          |          |          |          |
|-----------------|-----------|----------|-----------------------|----------|----------|----------|----------|
| <i>FERMT1</i>   | -0.030764 | 0.969704 | 3.31x10 <sup>-1</sup> | 0.911428 | 1.031706 | 0.809312 | 0.808628 |
| <i>HHIP</i>     | -0.006721 | 0.993301 | 3.06x10 <sup>-1</sup> | 0.980608 | 1.006159 | 0.987603 | 0.808628 |
| <i>SELP</i>     | -0.513464 | 0.598419 | 3.45x10 <sup>-1</sup> | 0.206214 | 1.736574 | 0.643539 | 0.808628 |
| <i>CXCL2</i>    | -0.207914 | 0.812277 | 3.08x10 <sup>-1</sup> | 0.544672 | 1.211361 | 0.827294 | 0.808628 |
| <i>KIF18B</i>   | 0.0361963 | 1.036859 | 2.84x10 <sup>-1</sup> | 0.970464 | 1.107797 | 0.778262 | 0.808628 |
| <i>PLK1</i>     | 0.0192335 | 1.01942  | 2.94x10 <sup>-1</sup> | 0.983465 | 1.056689 | 0.927053 | 0.808628 |
| <i>C4orf26</i>  | 0.5164052 | 1.675992 | 2.87x10 <sup>-1</sup> | 0.648143 | 4.333841 | 0.875563 | 0.808628 |
| <i>KIAA1199</i> | -0.001109 | 0.998891 | 3.21x10 <sup>-1</sup> | 0.996705 | 1.001082 | 0.745655 | 0.808628 |
| <i>DES</i>      | -0.030432 | 0.970027 | 3.25x10 <sup>-1</sup> | 0.912965 | 1.030655 | 0.664101 | 0.808628 |
| <i>CBX2</i>     | -0.005052 | 0.994961 | 3.19x10 <sup>-1</sup> | 0.985128 | 1.004892 | 0.720118 | 0.808628 |
| <i>AGT</i>      | -0.009466 | 0.990579 | 3.42x10 <sup>-1</sup> | 0.971409 | 1.010126 | 0.844476 | 0.808628 |
| <i>FOXF1</i>    | -0.040345 | 0.960458 | 3.14x10 <sup>-1</sup> | 0.887968 | 1.038866 | 0.784928 | 0.808628 |
| <i>BMP8A</i>    | -0.022516 | 0.977736 | 2.91x10 <sup>-1</sup> | 0.937697 | 1.019484 | 0.538454 | 0.808628 |
| <i>SYT13</i>    | -0.005934 | 0.994083 | 2.79x10 <sup>-1</sup> | 0.983455 | 1.004826 | 0.80382  | 0.808628 |
| <i>PDZD2</i>    | -0.00631  | 0.99371  | 3.10x10 <sup>-1</sup> | 0.98167  | 1.005898 | 0.934248 | 0.808628 |
| <i>UNC93A</i>   | -0.380637 | 0.683426 | 3.26x10 <sup>-1</sup> | 0.319894 | 1.46008  | 0.990553 | 0.808628 |
| <i>SLC7A11</i>  | -0.004297 | 0.995713 | 3.43x10 <sup>-1</sup> | 0.986905 | 1.004599 | 0.72581  | 0.808628 |

|                 |           |          |                       |          |          |          |          |
|-----------------|-----------|----------|-----------------------|----------|----------|----------|----------|
| <i>ADAMTSL3</i> | -0.022636 | 0.977618 | 3.00x10 <sup>-1</sup> | 0.936692 | 1.020333 | 0.894907 | 0.808628 |
| <i>DUOX2</i>    | -0.015554 | 0.984566 | 3.23x10 <sup>-1</sup> | 0.954648 | 1.015422 | 0.972646 | 0.808628 |
| <i>TPPP3</i>    | -0.004142 | 0.995867 | 3.19x10 <sup>-1</sup> | 0.987792 | 1.004007 | 0.589328 | 0.808628 |
| <i>PLA2G2A</i>  | -0.005924 | 0.994094 | 2.86x10 <sup>-1</sup> | 0.983342 | 1.004963 | 0.860214 | 0.808628 |
| <i>TMPRSS4</i>  | -0.001543 | 0.998459 | 3.36x10 <sup>-1</sup> | 0.995323 | 1.001604 | 0.676871 | 0.808628 |
| <i>MARCO</i>    | -0.005554 | 0.994461 | 2.86x10 <sup>-1</sup> | 0.984364 | 1.004662 | 0.913845 | 0.808628 |
| <i>EZH2</i>     | 0.0430785 | 1.04402  | 3.36x10 <sup>-1</sup> | 0.956249 | 1.139847 | 0.775912 | 0.808628 |
| <i>PPAP2C</i>   | -0.006224 | 0.993795 | 2.94x10 <sup>-1</sup> | 0.982311 | 1.005414 | 0.623422 | 0.808628 |
| <i>LRRC36</i>   | -0.055898 | 0.945635 | 3.03x10 <sup>-1</sup> | 0.850188 | 1.051798 | 0.754074 | 0.808628 |
| <i>LRRC15</i>   | 0.0118932 | 1.011964 | 3.15x10 <sup>-1</sup> | 0.988777 | 1.035695 | 0.752409 | 0.808628 |
| <i>GKN1</i>     | -0.099365 | 0.905412 | 3.39x10 <sup>-1</sup> | 0.73857  | 1.109944 | 0.694377 | 0.808628 |
| <i>FMO2</i>     | -0.031182 | 0.969299 | 3.34x10 <sup>-1</sup> | 0.909892 | 1.032585 | 0.847554 | 0.808628 |
| <i>RTKN2</i>    | 0.0094958 | 1.009541 | 3.22x10 <sup>-1</sup> | 0.990756 | 1.028682 | 0.765625 | 0.808628 |
| <i>TPBG</i>     | 0.011429  | 1.011495 | 3.13x10 <sup>-1</sup> | 0.9893   | 1.034187 | 0.632454 | 0.808628 |
| <i>MCM4</i>     | -0.020483 | 0.979726 | 3.33x10 <sup>-1</sup> | 0.939932 | 1.021204 | 0.863096 | 0.808628 |
| <i>GCLC</i>     | 0.000958  | 1.000958 | 3.42x10 <sup>-1</sup> | 0.998982 | 1.002939 | 0.724586 | 0.808628 |
| <i>TUBB3</i>    | 0.0065679 | 1.00659  | 3.25x10 <sup>-1</sup> | 0.993507 | 1.019844 | 0.639897 | 0.808628 |

|                 |           |          |                       |          |          |          |          |
|-----------------|-----------|----------|-----------------------|----------|----------|----------|----------|
| <i>TMEM132A</i> | -0.004846 | 0.995166 | 3.02x10 <sup>-1</sup> | 0.986047 | 1.004369 | 0.57208  | 0.808628 |
| <i>SC65</i>     | 0.0067151 | 1.006738 | 2.79x10 <sup>-1</sup> | 0.994565 | 1.019059 | 0.687249 | 0.808628 |
| <i>ACVRL1</i>   | -0.006829 | 0.993194 | 3.49x10 <sup>-1</sup> | 0.979101 | 1.007491 | 0.770289 | 0.814356 |
| <i>VGLL2</i>    | -0.391056 | 0.676342 | 3.53x10 <sup>-1</sup> | 0.296353 | 1.543561 | 0.742184 | 0.814512 |
| <i>MTMR7</i>    | -0.010364 | 0.98969  | 3.52x10 <sup>-1</sup> | 0.968304 | 1.011548 | 0.803647 | 0.814512 |
| <i>GHR</i>      | -0.439948 | 0.64407  | 3.54x10 <sup>-1</sup> | 0.253933 | 1.633601 | 0.731214 | 0.814512 |
| <i>GRIA1</i>    | -0.053964 | 0.947466 | 3.60x10 <sup>-1</sup> | 0.84401  | 1.063603 | 0.90505  | 0.820653 |
| <i>SLC38A8</i>  | -0.092886 | 0.911297 | 3.60x10 <sup>-1</sup> | 0.746899 | 1.111881 | 0.79566  | 0.820653 |
| <i>KCNE4</i>    | -0.005769 | 0.994247 | 3.63x10 <sup>-1</sup> | 0.981966 | 1.006683 | 0.986275 | 0.822734 |
| <i>SCGB1D2</i>  | -1.616133 | 0.198665 | 3.68x10 <sup>-1</sup> | 0.005871 | 6.722222 | 0.904393 | 0.827157 |
| <i>COX4I2</i>   | -1.009728 | 0.364318 | 3.67x10 <sup>-1</sup> | 0.040652 | 3.264941 | 0.694792 | 0.827157 |
| <i>GDF10</i>    | -0.035457 | 0.965164 | 3.76x10 <sup>-1</sup> | 0.892302 | 1.043975 | 0.745995 | 0.828508 |
| <i>CAMKV</i>    | -1.223098 | 0.294317 | 3.75x10 <sup>-1</sup> | 0.019688 | 4.399761 | 0.813862 | 0.828508 |
| <i>ITGA11</i>   | 0.0057066 | 1.005723 | 3.73x10 <sup>-1</sup> | 0.993181 | 1.018424 | 0.661169 | 0.828508 |
| <i>RAMP3</i>    | 0.0272767 | 1.027652 | 3.72x10 <sup>-1</sup> | 0.967952 | 1.091034 | 0.674296 | 0.828508 |
| <i>ESPN</i>     | -0.016175 | 0.983955 | 3.82x10 <sup>-1</sup> | 0.948914 | 1.02029  | 0.843241 | 0.837871 |
| <i>GJB2</i>     | 0.0050289 | 1.005042 | 3.84x10 <sup>-1</sup> | 0.993729 | 1.016483 | 0.682769 | 0.838223 |



|                 |           |          |                       |          |          |          |          |
|-----------------|-----------|----------|-----------------------|----------|----------|----------|----------|
| <i>AGR2</i>     | 0.0001441 | 1.000144 | 3.97x10 <sup>-1</sup> | 0.999811 | 1.000478 | 0.743878 | 0.839973 |
| <i>LTBP4</i>    | -0.010133 | 0.989918 | 3.99x10 <sup>-1</sup> | 0.966888 | 1.013496 | 0.809122 | 0.839973 |
| <i>TFF1</i>     | -0.00084  | 0.999161 | 3.99x10 <sup>-1</sup> | 0.997214 | 1.001111 | 0.728143 | 0.839973 |
| <i>ANLN</i>     | 0.0067341 | 1.006757 | 3.99x10 <sup>-1</sup> | 0.991138 | 1.022622 | 0.724778 | 0.839973 |
| <i>FANCI</i>    | 0.0320706 | 1.03259  | 3.90x10 <sup>-1</sup> | 0.959748 | 1.110961 | 0.709355 | 0.839973 |
| <i>IL4I1</i>    | -0.021373 | 0.978854 | 3.97x10 <sup>-1</sup> | 0.931645 | 1.028454 | 0.758971 | 0.839973 |
| <i>LGALS4</i>   | -0.000694 | 0.999306 | 3.97x10 <sup>-1</sup> | 0.997702 | 1.000913 | 0.603979 | 0.839973 |
| <i>GRASP</i>    | 0.0793823 | 1.082618 | 3.91x10 <sup>-1</sup> | 0.903017 | 1.29794  | 0.712779 | 0.839973 |
| <i>FGR</i>      | -0.018786 | 0.981389 | 4.10x10 <sup>-1</sup> | 0.9385   | 1.026238 | 0.701927 | 0.84236  |
| <i>PANX2</i>    | 0.015349  | 1.015467 | 4.07x10 <sup>-1</sup> | 0.97927  | 1.053003 | 0.714077 | 0.84236  |
| <i>THBD</i>     | 0.0046841 | 1.004695 | 4.11x10 <sup>-1</sup> | 0.993549 | 1.015967 | 0.743758 | 0.84236  |
| <i>SLC6A4</i>   | -0.090326 | 0.913634 | 4.10x10 <sup>-1</sup> | 0.736948 | 1.132679 | 0.61172  | 0.84236  |
| <i>EREG</i>     | 0.001834  | 1.001836 | 4.08x10 <sup>-1</sup> | 0.99749  | 1.0062   | 0.774012 | 0.84236  |
| <i>CACNA2D2</i> | -0.012031 | 0.988041 | 4.03x10 <sup>-1</sup> | 0.960544 | 1.016326 | 0.744529 | 0.84236  |
| <i>C8orf84</i>  | -0.043755 | 0.957189 | 4.13x10 <sup>-1</sup> | 0.862019 | 1.062865 | 0.623885 | 0.843403 |
| <i>HMGA2</i>    | -0.009564 | 0.990481 | 4.16x10 <sup>-1</sup> | 0.967926 | 1.013562 | 0.831642 | 0.843826 |
| <i>TSPAN8</i>   | 0.0022418 | 1.002244 | 4.17x10 <sup>-1</sup> | 0.996837 | 1.007681 | 0.729258 | 0.843826 |

|                 |           |          |                       |          |          |          |          |
|-----------------|-----------|----------|-----------------------|----------|----------|----------|----------|
| <i>STYK1</i>    | -0.031095 | 0.969383 | 4.18x10 <sup>-1</sup> | 0.899059 | 1.045208 | 0.720275 | 0.843826 |
| <i>C2CD4A</i>   | -0.003246 | 0.996759 | 4.30x10 <sup>-1</sup> | 0.988763 | 1.00482  | 0.744763 | 0.843848 |
| <i>PHLDA2</i>   | -0.014218 | 0.985883 | 4.48x10 <sup>-1</sup> | 0.950297 | 1.022801 | 0.795927 | 0.843848 |
| <i>FZD10</i>    | -0.004333 | 0.995676 | 4.43x10 <sup>-1</sup> | 0.984716 | 1.006758 | 0.800466 | 0.843848 |
| <i>CD36</i>     | -0.005027 | 0.994986 | 4.44x10 <sup>-1</sup> | 0.98225  | 1.007887 | 0.841548 | 0.843848 |
| <i>CCNB1</i>    | -0.010831 | 0.989228 | 4.49x10 <sup>-1</sup> | 0.961862 | 1.017372 | 0.790902 | 0.843848 |
| <i>SOHLH1</i>   | 0.7187039 | 2.051772 | 4.34x10 <sup>-1</sup> | 0.338785 | 12.42607 | 0.615156 | 0.843848 |
| <i>C8orf73</i>  | 0.0025916 | 1.002595 | 4.22x10 <sup>-1</sup> | 0.996275 | 1.008955 | 0.732976 | 0.843848 |
| <i>NXPPI</i>    | -0.113462 | 0.892738 | 4.60x10 <sup>-1</sup> | 0.660632 | 1.206392 | 0.697364 | 0.843848 |
| <i>FHL5</i>     | -0.105644 | 0.899745 | 4.51x10 <sup>-1</sup> | 0.683733 | 1.184002 | 0.801306 | 0.843848 |
| <i>TM4SF4</i>   | -0.006798 | 0.993225 | 4.41x10 <sup>-1</sup> | 0.976198 | 1.01055  | 0.553638 | 0.843848 |
| <i>MUC6</i>     | 0.0006091 | 1.000609 | 4.52x10 <sup>-1</sup> | 0.999023 | 1.002198 | 0.778497 | 0.843848 |
| <i>CELSR3</i>   | -0.019207 | 0.980977 | 4.34x10 <sup>-1</sup> | 0.93487  | 1.029357 | 0.740273 | 0.843848 |
| <i>PTPRH</i>    | 0.0075319 | 1.00756  | 4.40x10 <sup>-1</sup> | 0.988502 | 1.026986 | 0.976811 | 0.843848 |
| <i>CLDN6</i>    | 0.0012392 | 1.00124  | 4.61x10 <sup>-1</sup> | 0.997947 | 1.004544 | 0.848385 | 0.843848 |
| <i>RETN</i>     | -0.082097 | 0.921182 | 4.34x10 <sup>-1</sup> | 0.75002  | 1.131406 | 0.882153 | 0.843848 |
| <i>MGC29506</i> | -0.002096 | 0.997907 | 4.41x10 <sup>-1</sup> | 0.992603 | 1.003239 | 0.714551 | 0.843848 |

|                 |           |          |                       |          |          |          |          |
|-----------------|-----------|----------|-----------------------|----------|----------|----------|----------|
| <i>RBP4</i>     | -0.019011 | 0.981169 | 4.55x10 <sup>-1</sup> | 0.933406 | 1.031375 | 0.547882 | 0.843848 |
| <i>GLDN</i>     | -0.041483 | 0.959366 | 4.59x10 <sup>-1</sup> | 0.859541 | 1.070783 | 0.940878 | 0.843848 |
| <i>C7orf52</i>  | 0.2358723 | 1.266013 | 4.49x10 <sup>-1</sup> | 0.687073 | 2.332776 | 0.70533  | 0.843848 |
| <i>BUB1</i>     | 0.0099445 | 1.009994 | 4.60x10 <sup>-1</sup> | 0.983707 | 1.036983 | 0.999468 | 0.843848 |
| <i>TFF3</i>     | -0.0003   | 0.9997   | 4.24x10 <sup>-1</sup> | 0.998965 | 1.000435 | 0.720782 | 0.843848 |
| <i>CHGB</i>     | -0.001133 | 0.998868 | 4.27x10 <sup>-1</sup> | 0.996078 | 1.001666 | 0.553304 | 0.843848 |
| <i>HIST1H1B</i> | 1.5900387 | 4.903939 | 4.56x10 <sup>-1</sup> | 0.074649 | 322.1578 | 0.771186 | 0.843848 |
| <i>ALDH3A1</i>  | -0.000328 | 0.999672 | 4.29x10 <sup>-1</sup> | 0.998858 | 1.000486 | 0.728075 | 0.843848 |
| <i>11-Mar</i>   | -0.164887 | 0.847989 | 4.86x10 <sup>-1</sup> | 0.533156 | 1.348733 | 0.980025 | 0.845946 |
| <i>ETV4</i>     | 0.0077549 | 1.007785 | 4.84x10 <sup>-1</sup> | 0.986139 | 1.029906 | 0.649347 | 0.845946 |
| <i>MMP1</i>     | -0.00022  | 0.99978  | 4.87x10 <sup>-1</sup> | 0.99916  | 1.000401 | 0.665088 | 0.845946 |
| <i>ABCA9</i>    | -0.110377 | 0.895496 | 4.83x10 <sup>-1</sup> | 0.657635 | 1.21939  | 0.814874 | 0.845946 |
| <i>ONECUT3</i>  | -0.695666 | 0.498742 | 4.78x10 <sup>-1</sup> | 0.072995 | 3.407674 | 0.768364 | 0.845946 |
| <i>WNT3A</i>    | -0.157713 | 0.854095 | 4.80x10 <sup>-1</sup> | 0.551229 | 1.323367 | 0.755205 | 0.845946 |
| <i>GPIHBP1</i>  | -0.081799 | 0.921457 | 4.89x10 <sup>-1</sup> | 0.730979 | 1.161569 | 0.746524 | 0.845946 |
| <i>ROBO4</i>    | 0.0142816 | 1.014384 | 4.82x10 <sup>-1</sup> | 0.974823 | 1.05555  | 0.817842 | 0.845946 |
| <i>NCKAP5</i>   | -0.012493 | 0.987584 | 4.68x10 <sup>-1</sup> | 0.954816 | 1.021477 | 0.720519 | 0.845946 |

|               |           |          |                       |          |          |          |          |
|---------------|-----------|----------|-----------------------|----------|----------|----------|----------|
| <i>ESPL1</i>  | 0.0230891 | 1.023358 | 4.71x10 <sup>-1</sup> | 0.961043 | 1.089713 | 0.662139 | 0.845946 |
| <i>SLC2A1</i> | -0.001616 | 0.998386 | 4.70x10 <sup>-1</sup> | 0.994016 | 1.002774 | 0.6576   | 0.845946 |
| <i>MUC4</i>   | 0.0010832 | 1.001084 | 4.84x10 <sup>-1</sup> | 0.998053 | 1.004124 | 0.738579 | 0.845946 |
| <i>GPRIN2</i> | 0.014357  | 1.014461 | 4.70x10 <sup>-1</sup> | 0.975685 | 1.054777 | 0.567024 | 0.845946 |
| <i>UPK1B</i>  | -0.002603 | 0.9974   | 4.81x10 <sup>-1</sup> | 0.990207 | 1.004646 | 0.716474 | 0.845946 |
| <i>CRLF1</i>  | -0.000935 | 0.999065 | 4.69x10 <sup>-1</sup> | 0.996538 | 1.001599 | 0.807148 | 0.845946 |
| <i>FABP4</i>  | -0.01359  | 0.986502 | 4.91x10 <sup>-1</sup> | 0.949111 | 1.025367 | 0.780767 | 0.846151 |
| <i>EDNRB</i>  | -0.005086 | 0.994927 | 4.99x10 <sup>-1</sup> | 0.980379 | 1.00969  | 0.95525  | 0.847959 |
| <i>NEFH</i>   | 0.0037667 | 1.003774 | 4.96x10 <sup>-1</sup> | 0.992939 | 1.014727 | 0.7542   | 0.847959 |
| <i>SEMA6D</i> | -0.013187 | 0.9869   | 5.01x10 <sup>-1</sup> | 0.949749 | 1.025504 | 0.690588 | 0.847959 |
| <i>SLIT2</i>  | -0.032395 | 0.968124 | 5.00x10 <sup>-1</sup> | 0.881227 | 1.06359  | 0.769401 | 0.847959 |
| <i>CA4</i>    | 0.1219618 | 1.129711 | 4.98x10 <sup>-1</sup> | 0.793608 | 1.608157 | 0.827977 | 0.847959 |
| <i>SPTBN2</i> | -0.011219 | 0.988844 | 5.04x10 <sup>-1</sup> | 0.956851 | 1.021906 | 0.844918 | 0.850322 |
| <i>SOX17</i>  | -0.095512 | 0.908908 | 5.09x10 <sup>-1</sup> | 0.684672 | 1.206584 | 0.786598 | 0.853001 |
| <i>COL3A1</i> | -0.000167 | 0.999833 | 5.09x10 <sup>-1</sup> | 0.999337 | 1.000329 | 0.728816 | 0.853001 |
| <i>APOA4</i>  | -1.489523 | 0.22548  | 5.13x10 <sup>-1</sup> | 0.002595 | 19.58896 | 0.71939  | 0.854078 |
| <i>SMOC1</i>  | 0.0054981 | 1.005513 | 5.12x10 <sup>-1</sup> | 0.989114 | 1.022184 | 0.737373 | 0.854078 |

|                 |           |          |                       |          |          |          |          |
|-----------------|-----------|----------|-----------------------|----------|----------|----------|----------|
| <i>SIRPB1</i>   | 0.0186973 | 1.018873 | 5.19x10 <sup>-1</sup> | 0.96261  | 1.078426 | 0.833677 | 0.858502 |
| <i>RPL13A1</i>  | -0.268844 | 0.764263 | 5.19x10 <sup>-1</sup> | 0.337307 | 1.731652 | 0.951957 | 0.858502 |
| 7               |           |          |                       |          |          |          |          |
| <i>SLC16A9</i>  | 0.0192505 | 1.019437 | 5.22x10 <sup>-1</sup> | 0.961119 | 1.081293 | 0.647782 | 0.859513 |
| <i>MTNRI1A</i>  | 0.3325273 | 1.394488 | 5.27x10 <sup>-1</sup> | 0.497955 | 3.905163 | 0.713623 | 0.864678 |
| <i>NDRG4</i>    | -0.016836 | 0.983305 | 5.29x10 <sup>-1</sup> | 0.933054 | 1.036262 | 0.766865 | 0.865802 |
| <i>C10orf71</i> | -0.151794 | 0.859165 | 5.32x10 <sup>-1</sup> | 0.533763 | 1.382945 | 0.706795 | 0.867174 |
| <i>SHCBP1</i>   | 0.0162336 | 1.016366 | 5.49x10 <sup>-1</sup> | 0.963842 | 1.071753 | 0.862456 | 0.867465 |
| <i>BDNF</i>     | -0.021277 | 0.978948 | 5.49x10 <sup>-1</sup> | 0.913082 | 1.049565 | 0.597599 | 0.867465 |
| <i>FNDC1</i>    | -0.004798 | 0.995213 | 5.43x10 <sup>-1</sup> | 0.979956 | 1.010708 | 0.939608 | 0.867465 |
| <i>CDO1</i>     | -0.026068 | 0.974269 | 5.56x10 <sup>-1</sup> | 0.89335  | 1.062519 | 0.798911 | 0.867465 |
| <i>NGEF</i>     | 0.049176  | 1.050405 | 5.47x10 <sup>-1</sup> | 0.895242 | 1.232462 | 0.6185   | 0.867465 |
| <i>FUT3</i>     | -0.005778 | 0.994238 | 5.56x10 <sup>-1</sup> | 0.975286 | 1.013559 | 0.598655 | 0.867465 |
| <i>EFNA2</i>    | -0.717677 | 0.487884 | 5.50x10 <sup>-1</sup> | 0.046442 | 5.125323 | 0.679027 | 0.867465 |
| <i>GINS2</i>    | 0.018624  | 1.018799 | 5.42x10 <sup>-1</sup> | 0.95955  | 1.081705 | 0.595135 | 0.867465 |
| <i>AGER</i>     | -0.001104 | 0.998897 | 5.58x10 <sup>-1</sup> | 0.995217 | 1.00259  | 0.708771 | 0.867465 |
| <i>MUC5B</i>    | 0.000066  | 1.000066 | 5.54x10 <sup>-1</sup> | 0.999846 | 1.000286 | 0.693621 | 0.867465 |

|                 |           |          |                       |          |          |          |          |
|-----------------|-----------|----------|-----------------------|----------|----------|----------|----------|
| <i>KIAA1683</i> | 0.0797819 | 1.083051 | 5.55x10 <sup>-1</sup> | 0.83107  | 1.411432 | 0.782193 | 0.867465 |
| <i>ACHE</i>     | -0.011024 | 0.989037 | 5.38x10 <sup>-1</sup> | 0.954967 | 1.024322 | 0.786623 | 0.867465 |
| <i>BCL2L15</i>  | 0.0063108 | 1.006331 | 5.38x10 <sup>-1</sup> | 0.986299 | 1.026769 | 0.854423 | 0.867465 |
| <i>COL5A2</i>   | -0.000745 | 0.999255 | 5.35x10 <sup>-1</sup> | 0.99691  | 1.001607 | 0.751517 | 0.867465 |
| <i>ARHGEF15</i> | -0.017532 | 0.982621 | 5.71x10 <sup>-1</sup> | 0.924851 | 1.043998 | 0.747522 | 0.873368 |
| <i>NPSR1</i>    | 0.0741264 | 1.076943 | 5.70x10 <sup>-1</sup> | 0.833655 | 1.391231 | 0.709036 | 0.873368 |
| <i>SPPI</i>     | -0.000381 | 0.999619 | 5.64x10 <sup>-1</sup> | 0.998324 | 1.000915 | 0.77956  | 0.873368 |
| <i>SPAG5</i>    | 0.0083189 | 1.008354 | 5.69x10 <sup>-1</sup> | 0.979859 | 1.037677 | 0.742031 | 0.873368 |
| <i>UCHL1</i>    | -0.000388 | 0.999612 | 5.68x10 <sup>-1</sup> | 0.998284 | 1.000943 | 0.851177 | 0.873368 |
| <i>PRX</i>      | -0.023838 | 0.976444 | 5.81x10 <sup>-1</sup> | 0.897171 | 1.062721 | 0.736166 | 0.883215 |
| <i>BARX1</i>    | -0.001729 | 0.998273 | 5.80x10 <sup>-1</sup> | 0.992181 | 1.004402 | 0.769649 | 0.883215 |
| <i>TMPRSS6</i>  | -0.004253 | 0.995756 | 5.83x10 <sup>-1</sup> | 0.980767 | 1.010975 | 0.720652 | 0.883215 |
| <i>NDST4</i>    | 0.2175333 | 1.243007 | 5.86x10 <sup>-1</sup> | 0.568186 | 2.719295 | 0.850602 | 0.885524 |
| <i>HSPA12B</i>  | 0.0369567 | 1.037648 | 5.94x10 <sup>-1</sup> | 0.905739 | 1.188768 | 0.690726 | 0.893418 |
| <i>THBS2</i>    | -0.00356  | 0.996446 | 5.95x10 <sup>-1</sup> | 0.983452 | 1.009611 | 0.696466 | 0.893418 |
| <i>ADAMTS12</i> | 0.0156759 | 1.015799 | 6.00x10 <sup>-1</sup> | 0.958066 | 1.077012 | 0.718471 | 0.894571 |
| <i>KRT23</i>    | -0.043607 | 0.95733  | 6.03x10 <sup>-1</sup> | 0.812155 | 1.128455 | 0.755033 | 0.894571 |

|                 |           |          |                       |          |          |          |          |
|-----------------|-----------|----------|-----------------------|----------|----------|----------|----------|
| <i>CDH2</i>     | 0.0065498 | 1.006571 | 6.02x10 <sup>-1</sup> | 0.982109 | 1.031643 | 0.76695  | 0.894571 |
| <i>KDELR3</i>   | 0.0200771 | 1.02028  | 5.99x10 <sup>-1</sup> | 0.946793 | 1.099471 | 0.67629  | 0.894571 |
| <i>SERPINB5</i> | 0.0064261 | 1.006447 | 6.32x10 <sup>-1</sup> | 0.980346 | 1.033243 | 0.80595  | 0.895138 |
| <i>SCN4B</i>    | 0.0213762 | 1.021606 | 6.41x10 <sup>-1</sup> | 0.933759 | 1.117718 | 0.771975 | 0.895138 |
| <i>OCIAD2</i>   | -0.001358 | 0.998643 | 6.10x10 <sup>-1</sup> | 0.993441 | 1.003871 | 0.717887 | 0.895138 |
| <i>GOLGA7B</i>  | -0.003619 | 0.996388 | 6.11x10 <sup>-1</sup> | 0.982582 | 1.010388 | 0.731497 | 0.895138 |
| <i>CDC48</i>    | 0.0079844 | 1.008016 | 6.18x10 <sup>-1</sup> | 0.976866 | 1.04016  | 0.738187 | 0.895138 |
| <i>CLEC3A</i>   | 0.2351362 | 1.265081 | 6.43x10 <sup>-1</sup> | 0.468397 | 3.416823 | 0.747659 | 0.895138 |
| <i>CDK5R1</i>   | 0.0516765 | 1.053035 | 6.32x10 <sup>-1</sup> | 0.852537 | 1.300686 | 0.67716  | 0.895138 |
| <i>SLC5A9</i>   | -0.021074 | 0.979147 | 6.31x10 <sup>-1</sup> | 0.898398 | 1.067154 | 0.773247 | 0.895138 |
| <i>NPTX1</i>    | 0.0016655 | 1.001667 | 6.20x10 <sup>-1</sup> | 0.995096 | 1.008281 | 0.885188 | 0.895138 |
| <i>COL6A6</i>   | -0.011254 | 0.988809 | 6.42x10 <sup>-1</sup> | 0.942943 | 1.036907 | 0.889356 | 0.895138 |
| <i>B3GNT3</i>   | 0.0142375 | 1.014339 | 6.22x10 <sup>-1</sup> | 0.958452 | 1.073486 | 0.507322 | 0.895138 |
| <i>NEK2</i>     | -0.011495 | 0.988571 | 6.26x10 <sup>-1</sup> | 0.943883 | 1.035375 | 0.755837 | 0.895138 |
| <i>F11</i>      | -0.035183 | 0.965429 | 6.45x10 <sup>-1</sup> | 0.83128  | 1.121227 | 0.886024 | 0.895138 |
| <i>RFX6</i>     | 0.0360149 | 1.036671 | 6.37x10 <sup>-1</sup> | 0.892741 | 1.203807 | 0.853951 | 0.895138 |
| <i>COL1A1</i>   | 0.000233  | 1.000233 | 6.15x10 <sup>-1</sup> | 0.999324 | 1.001143 | 0.780131 | 0.895138 |

|                 |           |                       |                       |          |          |          |          |
|-----------------|-----------|-----------------------|-----------------------|----------|----------|----------|----------|
| <i>LCN2</i>     | -0.000778 | 0.999223              | $6.09 \times 10^{-1}$ | 0.996249 | 1.002206 | 0.74458  | 0.895138 |
| <i>FAP</i>      | 0.0096354 | 1.009682              | $6.26 \times 10^{-1}$ | 0.97129  | 1.049591 | 0.714309 | 0.895138 |
| <i>TGMI</i>     | 0.1199543 | 1.127445              | $6.35 \times 10^{-1}$ | 0.68664  | 1.851236 | 0.799336 | 0.895138 |
| <i>TGFBR3</i>   | -0.018926 | 0.981252              | $6.45 \times 10^{-1}$ | 0.905337 | 1.063532 | 0.569159 | 0.895138 |
| <i>SI00P</i>    | 0.0001163 | 1.000116              | $6.41 \times 10^{-1}$ | 0.999627 | 1.000606 | 0.755628 | 0.895138 |
| <i>CYP24A1</i>  | -0.000581 | 0.999419              | $6.34 \times 10^{-1}$ | 0.997036 | 1.001809 | 0.752833 | 0.895138 |
| <i>CXCL14</i>   | 0.0001684 | 1.000168              | $6.33 \times 10^{-1}$ | 0.999478 | 1.00086  | 0.926793 | 0.895138 |
| <i>DBNDD1</i>   | 0.002587  | 1.00259               | $6.51 \times 10^{-1}$ | 0.991431 | 1.013875 | 0.694567 | 0.895626 |
| <i>NKX6-1</i>   | -0.318181 | 0.727471              | $6.53 \times 10^{-1}$ | 0.181803 | 2.910929 | 0.771857 | 0.895626 |
| <i>H19</i>      | 0.000025  | 1.000025              | $6.51 \times 10^{-1}$ | 0.999917 | 1.000133 | 0.685853 | 0.895626 |
| <i>RCN3</i>     | -0.004703 | 0.995308              | $6.50 \times 10^{-1}$ | 0.975287 | 1.01574  | 0.921962 | 0.895626 |
| <i>LRFN2</i>    | 148.21886 | $2.35 \times 10^{64}$ | $6.64 \times 10^{-1}$ | 0.000000 | Inf      | 0.708189 | 0.898072 |
| <i>PNLIPRP3</i> | 0.3707148 | 1.44877               | $6.59 \times 10^{-1}$ | 0.27909  | 7.520648 | 0.767375 | 0.898072 |
| <i>FUT2</i>     | -0.003685 | 0.996322              | $6.68 \times 10^{-1}$ | 0.979693 | 1.013233 | 0.747612 | 0.898072 |
| <i>EEF1A2</i>   | 0.0006021 | 1.000602              | $6.70 \times 10^{-1}$ | 0.997837 | 1.003375 | 0.775944 | 0.898072 |
| <i>HES6</i>     | -0.002357 | 0.997646              | $6.60 \times 10^{-1}$ | 0.987207 | 1.008195 | 0.709335 | 0.898072 |
| <i>KIFC1</i>    | 0.0040672 | 1.004075              | $6.66 \times 10^{-1}$ | 0.985676 | 1.022818 | 0.799276 | 0.898072 |



|                 |           |          |                       |          |              |          |          |
|-----------------|-----------|----------|-----------------------|----------|--------------|----------|----------|
| <i>COMP</i>     | 0.0039744 | 1.003982 | $6.58 \times 10^{-1}$ | 0.986472 | 1.021804     | 0.767726 | 0.898072 |
| <i>UHRF1</i>    | 0.1585328 | 1.17179  | $6.70 \times 10^{-1}$ | 0.565477 | 2.428203     | 0.718502 | 0.898072 |
| <i>FAM83A</i>   | 0.0003996 | 1.0004   | $6.83 \times 10^{-1}$ | 0.998484 | 1.002319     | 0.762111 | 0.903814 |
| <i>PAX7</i>     | 0.001408  | 1.001409 | $6.85 \times 10^{-1}$ | 0.994609 | 1.008256     | 0.780521 | 0.903814 |
| <i>VEPH1</i>    | 0.0044199 | 1.00443  | $6.84 \times 10^{-1}$ | 0.983264 | 1.026051     | 0.780142 | 0.903814 |
| <i>NKX1-2</i>   | 4.7948325 | 120.8841 | $6.79 \times 10^{-1}$ | 0.000000 | 877000000000 | 0.746088 | 0.903814 |
| <i>SBK1</i>     | 0.0025689 | 1.002572 | $6.83 \times 10^{-1}$ | 0.990287 | 1.01501      | 0.71457  | 0.903814 |
| <i>GALNT14</i>  | -0.002898 | 0.997106 | $6.85 \times 10^{-1}$ | 0.983262 | 1.011146     | 0.711001 | 0.903814 |
| <i>PCOLCE2</i>  | -0.008878 | 0.991161 | $6.92 \times 10^{-1}$ | 0.94856  | 1.035676     | 0.73671  | 0.909984 |
| <i>PLUNC</i>    | -0.000019 | 0.999981 | $6.98 \times 10^{-1}$ | 0.999886 | 1.000076     | 0.895319 | 0.911282 |
| <i>CDC6</i>     | -0.028249 | 0.972146 | $6.98 \times 10^{-1}$ | 0.842855 | 1.121269     | 0.753173 | 0.911282 |
| <i>WDR62</i>    | -0.011531 | 0.988535 | $6.99 \times 10^{-1}$ | 0.932457 | 1.047987     | 0.776684 | 0.911282 |
| <i>GPX2</i>     | -0.000148 | 0.999852 | $7.06 \times 10^{-1}$ | 0.999083 | 1.000622     | 0.75681  | 0.918455 |
| <i>GNG4</i>     | 0.0018314 | 1.001833 | $7.23 \times 10^{-1}$ | 0.991744 | 1.012025     | 0.75168  | 0.922651 |
| <i>LOC84740</i> | 0.0003304 | 1.00033  | $7.22 \times 10^{-1}$ | 0.998511 | 1.002154     | 0.762588 | 0.922651 |
| <i>ABCA4</i>    | -0.002043 | 0.997959 | $7.23 \times 10^{-1}$ | 0.986747 | 1.009298     | 0.783044 | 0.922651 |
| <i>TF</i>       | 0.0001566 | 1.000157 | $7.15 \times 10^{-1}$ | 0.999315 | 1.000999     | 0.732485 | 0.922651 |

|                 |           |          |                       |          |          |          |          |
|-----------------|-----------|----------|-----------------------|----------|----------|----------|----------|
| <i>ACADL</i>    | 0.0859337 | 1.089734 | 7.21x10 <sup>-1</sup> | 0.679604 | 1.747371 | 0.816772 | 0.922651 |
| <i>TNXB</i>     | -0.003185 | 0.99682  | 7.18x10 <sup>-1</sup> | 0.979714 | 1.014224 | 0.779797 | 0.922651 |
| <i>ANKRD1</i>   | -0.018664 | 0.981509 | 7.16x10 <sup>-1</sup> | 0.887693 | 1.085241 | 0.802653 | 0.922651 |
| <i>GABRA5</i>   | -0.230018 | 0.794519 | 7.29x10 <sup>-1</sup> | 0.215799 | 2.925232 | 0.745617 | 0.922806 |
| <i>CPXM1</i>    | -0.008438 | 0.991598 | 7.29x10 <sup>-1</sup> | 0.945325 | 1.040135 | 0.770713 | 0.922806 |
| <i>NPR1</i>     | -0.010459 | 0.989595 | 7.26x10 <sup>-1</sup> | 0.933406 | 1.049167 | 0.479561 | 0.922806 |
| <i>LOXL2</i>    | 0.0014983 | 1.001499 | 7.31x10 <sup>-1</sup> | 0.992985 | 1.010087 | 0.710547 | 0.922806 |
| <i>GINS4</i>    | 0.0460645 | 1.047142 | 7.39x10 <sup>-1</sup> | 0.798272 | 1.373599 | 0.504488 | 0.931047 |
| <i>MMP13</i>    | -0.001085 | 0.998916 | 7.44x10 <sup>-1</sup> | 0.992431 | 1.005443 | 0.746129 | 0.933308 |
| <i>PROM2</i>    | 0.0008318 | 1.000832 | 7.46x10 <sup>-1</sup> | 0.995801 | 1.005889 | 0.797494 | 0.933308 |
| <i>C3orf30</i>  | -0.179125 | 0.836001 | 7.47x10 <sup>-1</sup> | 0.281511 | 2.482669 | 0.813326 | 0.933308 |
| <i>TCN1</i>     | 0.0079688 | 1.008001 | 7.66x10 <sup>-1</sup> | 0.956478 | 1.062299 | 0.603165 | 0.942545 |
| <i>CPLX2</i>    | 0.0002998 | 1.0003   | 7.66x10 <sup>-1</sup> | 0.998324 | 1.002279 | 0.819498 | 0.942545 |
| <i>CHEK1</i>    | 0.0137791 | 1.013874 | 7.60x10 <sup>-1</sup> | 0.928111 | 1.107562 | 0.754401 | 0.942545 |
| <i>FAM189A2</i> | -0.006455 | 0.993566 | 7.57x10 <sup>-1</sup> | 0.95368  | 1.03512  | 0.688997 | 0.942545 |
| <i>WNK2</i>     | -0.005001 | 0.995012 | 7.64x10 <sup>-1</sup> | 0.963009 | 1.028078 | 0.631334 | 0.942545 |
| <i>KIAA0101</i> | 0.0113901 | 1.011455 | 7.62x10 <sup>-1</sup> | 0.939495 | 1.088927 | 0.792978 | 0.942545 |

|                  |           |          |                       |          |          |          |          |
|------------------|-----------|----------|-----------------------|----------|----------|----------|----------|
| <i>KLK5</i>      | 0.0095435 | 1.009589 | 7.72x10 <sup>-1</sup> | 0.946427 | 1.076967 | 0.764307 | 0.947309 |
| <i>ARC</i>       | 0.3079259 | 1.3606   | 7.76x10 <sup>-1</sup> | 0.162639 | 11.38248 | 0.723678 | 0.947502 |
| <i>LDB2</i>      | -0.012165 | 0.987909 | 7.76x10 <sup>-1</sup> | 0.908402 | 1.074374 | 0.733281 | 0.947502 |
| <i>EFNA4</i>     | -0.005563 | 0.994453 | 7.81x10 <sup>-1</sup> | 0.95624  | 1.034192 | 0.641248 | 0.948136 |
| <i>ADAM8</i>     | -0.000684 | 0.999316 | 7.79x10 <sup>-1</sup> | 0.994547 | 1.004109 | 0.734273 | 0.948136 |
| <i>TMEM59L</i>   | -0.001976 | 0.998026 | 7.84x10 <sup>-1</sup> | 0.984031 | 1.01222  | 0.758489 | 0.949503 |
| <i>COL11A1</i>   | 0.0010351 | 1.001036 | 8.15x10 <sup>-1</sup> | 0.99238  | 1.009767 | 0.76595  | 0.956399 |
| <i>ABCC3</i>     | 0.0001602 | 1.00016  | 8.20x10 <sup>-1</sup> | 0.998783 | 1.00154  | 0.860021 | 0.956399 |
| <i>WIF1</i>      | -0.000496 | 0.999504 | 8.17x10 <sup>-1</sup> | 0.995308 | 1.003718 | 0.78727  | 0.956399 |
| <i>C15orf48</i>  | 0.0020652 | 1.002067 | 8.14x10 <sup>-1</sup> | 0.984954 | 1.019478 | 0.728681 | 0.956399 |
| <i>AK3L1</i>     | -0.003543 | 0.996463 | 7.97x10 <sup>-1</sup> | 0.969942 | 1.02371  | 0.687862 | 0.956399 |
| <i>FAM92B</i>    | -0.018425 | 0.981743 | 8.16x10 <sup>-1</sup> | 0.840915 | 1.146156 | 0.764105 | 0.956399 |
| <i>VCAN</i>      | -0.00017  | 0.99983  | 8.18x10 <sup>-1</sup> | 0.998379 | 1.001282 | 0.758627 | 0.956399 |
| <i>MMP11</i>     | -0.000869 | 0.999131 | 8.16x10 <sup>-1</sup> | 0.991832 | 1.006484 | 0.6938   | 0.956399 |
| <i>CST1</i>      | -0.000916 | 0.999084 | 8.10x10 <sup>-1</sup> | 0.991657 | 1.006568 | 0.827338 | 0.956399 |
| <i>RHBDL2</i>    | 0.005166  | 1.005179 | 8.14x10 <sup>-1</sup> | 0.962835 | 1.049386 | 0.865156 | 0.956399 |
| <i>C14orf132</i> | 0.0050229 | 1.005036 | 8.10x10 <sup>-1</sup> | 0.964675 | 1.047085 | 0.94184  | 0.956399 |

|                |           |          |                       |          |          |          |          |
|----------------|-----------|----------|-----------------------|----------|----------|----------|----------|
| <i>SERINC2</i> | -0.001144 | 0.998856 | 8.01x10 <sup>-1</sup> | 0.990023 | 1.007768 | 0.719564 | 0.956399 |
| <i>ABI3BP</i>  | 0.0030298 | 1.003034 | 8.05x10 <sup>-1</sup> | 0.979188 | 1.027461 | 0.721299 | 0.956399 |
| <i>RAC3</i>    | -0.00227  | 0.997733 | 8.08x10 <sup>-1</sup> | 0.97964  | 1.01616  | 0.728252 | 0.956399 |
| <i>PLOD2</i>   | -0.000583 | 0.999417 | 8.00x10 <sup>-1</sup> | 0.994915 | 1.003939 | 0.585083 | 0.956399 |
| <i>PDK4</i>    | -0.000915 | 0.999085 | 8.32x10 <sup>-1</sup> | 0.990652 | 1.00759  | 0.787934 | 0.960761 |
| <i>CYS1</i>    | -0.003758 | 0.996249 | 8.32x10 <sup>-1</sup> | 0.962312 | 1.031382 | 0.846416 | 0.960761 |
| <i>SMR3B</i>   | 1.0039447 | 2.729026 | 8.29x10 <sup>-1</sup> | 0.0003   | 24797.35 | 0.946085 | 0.960761 |
| <i>FAM107A</i> | 0.0617426 | 1.063689 | 8.31x10 <sup>-1</sup> | 0.603368 | 1.875195 | 0.90365  | 0.960761 |
| <i>CFD</i>     | -0.002069 | 0.997933 | 8.34x10 <sup>-1</sup> | 0.978854 | 1.017384 | 0.621963 | 0.960761 |
| <i>GABRP</i>   | -0.001118 | 0.998882 | 8.40x10 <sup>-1</sup> | 0.988086 | 1.009796 | 0.782408 | 0.962724 |
| <i>PBK</i>     | -0.010201 | 0.989851 | 8.41x10 <sup>-1</sup> | 0.895744 | 1.093844 | 0.885659 | 0.962724 |
| <i>QPCT</i>    | -0.000225 | 0.999775 | 8.39x10 <sup>-1</sup> | 0.997612 | 1.001943 | 0.734005 | 0.962724 |
| <i>LGR4</i>    | -0.00069  | 0.999311 | 8.44x10 <sup>-1</sup> | 0.992448 | 1.006221 | 0.722815 | 0.963367 |
| <i>MS4A7</i>   | 0.002222  | 1.002225 | 8.46x10 <sup>-1</sup> | 0.980004 | 1.024948 | 0.778717 | 0.963367 |
| <i>LECT1</i>   | 0.0002488 | 1.000249 | 8.52x10 <sup>-1</sup> | 0.997644 | 1.002861 | 0.71658  | 0.967521 |
| <i>PKMYT1</i>  | -0.025469 | 0.974853 | 8.63x10 <sup>-1</sup> | 0.729446 | 1.30282  | 0.762643 | 0.968291 |
| <i>BUB1B</i>   | -0.002987 | 0.997018 | 8.68x10 <sup>-1</sup> | 0.962602 | 1.032663 | 0.76004  | 0.968291 |

|                  |           |          |                       |          |          |          |          |
|------------------|-----------|----------|-----------------------|----------|----------|----------|----------|
| <i>NKX2-5</i>    | -0.069739 | 0.932637 | 8.71x10 <sup>-1</sup> | 0.400852 | 2.169908 | 0.805299 | 0.968291 |
| <i>PPP2R2C</i>   | 0.0027548 | 1.002759 | 8.66x10 <sup>-1</sup> | 0.971173 | 1.035372 | 0.755627 | 0.968291 |
| <i>CABYR</i>     | -0.001646 | 0.998355 | 8.73x10 <sup>-1</sup> | 0.978362 | 1.018757 | 0.787622 | 0.968291 |
| <i>ST8SIA3</i>   | 0.011124  | 1.011186 | 8.78x10 <sup>-1</sup> | 0.877091 | 1.165782 | 0.705035 | 0.968291 |
| <i>HBB</i>       | 0.0005569 | 1.000557 | 8.70x10 <sup>-1</sup> | 0.993909 | 1.007249 | 0.775062 | 0.968291 |
| <i>ADAMTS8</i>   | 0.0047933 | 1.004805 | 8.73x10 <sup>-1</sup> | 0.947633 | 1.065425 | 0.741884 | 0.968291 |
| <i>POU2AF1</i>   | 0.0025166 | 1.00252  | 8.72x10 <sup>-1</sup> | 0.97226  | 1.033722 | 0.769457 | 0.968291 |
| <i>C14orf162</i> | -0.203401 | 0.815951 | 8.78x10 <sup>-1</sup> | 0.060512 | 11.00242 | 0.693061 | 0.968291 |
| <i>KCNT2</i>     | 0.0177617 | 1.01792  | 8.79x10 <sup>-1</sup> | 0.810178 | 1.278931 | 0.951032 | 0.968291 |
| <i>GPRIN1</i>    | 0.0114495 | 1.011515 | 8.71x10 <sup>-1</sup> | 0.881352 | 1.160901 | 0.650425 | 0.968291 |
| <i>PHACTR1</i>   | -0.020926 | 0.979292 | 8.55x10 <sup>-1</sup> | 0.78279  | 1.225121 | 0.929197 | 0.968291 |
| <i>CTHRC1</i>    | 0.0006806 | 1.000681 | 8.85x10 <sup>-1</sup> | 0.991533 | 1.009913 | 0.832446 | 0.972349 |
| <i>CLDN5</i>     | -0.00181  | 0.998191 | 9.16x10 <sup>-1</sup> | 0.965186 | 1.032325 | 0.791253 | 0.977713 |
| <i>NPTX2</i>     | 0.0008393 | 1.00084  | 9.46x10 <sup>-1</sup> | 0.976996 | 1.025265 | 0.749732 | 0.977713 |
| <i>ITIH5</i>     | 0.0005112 | 1.000511 | 9.27x10 <sup>-1</sup> | 0.989574 | 1.011569 | 0.750354 | 0.977713 |
| <i>CRTAC1</i>    | -0.000276 | 0.999724 | 9.37x10 <sup>-1</sup> | 0.992875 | 1.006619 | 0.756511 | 0.977713 |
| <i>P2RY6</i>     | 0.0005098 | 1.00051  | 9.22x10 <sup>-1</sup> | 0.990324 | 1.010801 | 0.740765 | 0.977713 |

|                 |           |          |                       |          |          |          |          |
|-----------------|-----------|----------|-----------------------|----------|----------|----------|----------|
| <i>FCN3</i>     | -0.001118 | 0.998883 | 9.39x10 <sup>-1</sup> | 0.970896 | 1.027676 | 0.754629 | 0.977713 |
| <i>C6orf174</i> | -0.002702 | 0.997301 | 9.33x10 <sup>-1</sup> | 0.93623  | 1.062357 | 0.838006 | 0.977713 |
| <i>PTTG1</i>    | -0.002543 | 0.997461 | 9.05x10 <sup>-1</sup> | 0.956819 | 1.039828 | 0.668574 | 0.977713 |
| <i>COL1A2</i>   | 0.000017  | 1.000016 | 9.39x10 <sup>-1</sup> | 0.999614 | 1.000418 | 0.887159 | 0.977713 |
| <i>ANGPT1</i>   | 0.0101629 | 1.010215 | 9.19x10 <sup>-1</sup> | 0.831172 | 1.227825 | 0.779088 | 0.977713 |
| <i>GCOM1</i>    | 0.0056206 | 1.005636 | 9.45x10 <sup>-1</sup> | 0.8582   | 1.178402 | 0.746672 | 0.977713 |
| <i>CBLC</i>     | 0.0006675 | 1.000668 | 9.41x10 <sup>-1</sup> | 0.983066 | 1.018584 | 0.766041 | 0.977713 |
| <i>DIO2</i>     | -0.001132 | 0.998868 | 9.30x10 <sup>-1</sup> | 0.973771 | 1.024612 | 0.743027 | 0.977713 |
| <i>CCNF</i>     | 0.0100986 | 1.01015  | 9.11x10 <sup>-1</sup> | 0.845632 | 1.206675 | 0.695917 | 0.977713 |
| <i>SSTR1</i>    | -0.004751 | 0.99526  | 9.16x10 <sup>-1</sup> | 0.911116 | 1.087176 | 0.818864 | 0.977713 |
| <i>KIF11</i>    | -0.010816 | 0.989242 | 9.16x10 <sup>-1</sup> | 0.809503 | 1.208891 | 0.778341 | 0.977713 |
| <i>GALNT6</i>   | 0.0014005 | 1.001401 | 9.35x10 <sup>-1</sup> | 0.968336 | 1.035596 | 0.762066 | 0.977713 |
| <i>COL5A1</i>   | -0.000228 | 0.999772 | 9.13x10 <sup>-1</sup> | 0.995667 | 1.003893 | 0.741052 | 0.977713 |
| <i>UGT1A6</i>   | 0.000047  | 1.000047 | 9.46x10 <sup>-1</sup> | 0.99868  | 1.001416 | 0.754961 | 0.977713 |
| <i>CDH3</i>     | 0.0003963 | 1.000396 | 9.36x10 <sup>-1</sup> | 0.990728 | 1.010159 | 0.751086 | 0.977713 |
| <i>SPOCK2</i>   | 0.000142  | 1.000142 | 8.97x10 <sup>-1</sup> | 0.998002 | 1.002286 | 0.677605 | 0.977713 |
| <i>PSAT1</i>    | 0.0014991 | 1.0015   | 9.03x10 <sup>-1</sup> | 0.977572 | 1.026014 | 0.621781 | 0.977713 |

|                |           |          |                       |          |          |          |          |
|----------------|-----------|----------|-----------------------|----------|----------|----------|----------|
| <i>SEMA3A</i>  | -0.000626 | 0.999374 | 8.95x10 <sup>-1</sup> | 0.990124 | 1.00871  | 0.7866   | 0.977713 |
| <i>FHL2</i>    | 0.0003685 | 1.000369 | 9.09x10 <sup>-1</sup> | 0.994036 | 1.006742 | 0.775618 | 0.977713 |
| <i>SEMA6A</i>  | -0.003913 | 0.996095 | 9.47x10 <sup>-1</sup> | 0.887744 | 1.11767  | 0.722451 | 0.977713 |
| <i>FBXO32</i>  | -0.000725 | 0.999275 | 9.39x10 <sup>-1</sup> | 0.980911 | 1.017982 | 0.758194 | 0.977713 |
| <i>EYA2</i>    | -0.000937 | 0.999063 | 9.10x10 <sup>-1</sup> | 0.98288  | 1.015513 | 0.994509 | 0.977713 |
| <i>PCDH9</i>   | 0.006109  | 1.006128 | 9.33x10 <sup>-1</sup> | 0.872236 | 1.160572 | 0.555551 | 0.977713 |
| <i>GPER</i>    | -0.002859 | 0.997145 | 9.53x10 <sup>-1</sup> | 0.906186 | 1.097233 | 0.739126 | 0.977933 |
| <i>ALDH3B2</i> | -0.001531 | 0.99847  | 9.53x10 <sup>-1</sup> | 0.949083 | 1.050427 | 0.68535  | 0.977933 |
| <i>FPR2</i>    | -0.006004 | 0.994014 | 9.52x10 <sup>-1</sup> | 0.819052 | 1.20635  | 0.739506 | 0.977933 |
| <i>KRT6A</i>   | -0.000070 | 0.99993  | 9.56x10 <sup>-1</sup> | 0.997417 | 1.002449 | 0.643739 | 0.979035 |
| <i>EPN3</i>    | -0.000949 | 0.999051 | 9.59x10 <sup>-1</sup> | 0.963947 | 1.035434 | 0.706804 | 0.979094 |
| <i>C2orf40</i> | -0.006509 | 0.993512 | 9.61x10 <sup>-1</sup> | 0.763847 | 1.292231 | 0.757263 | 0.979822 |
| <i>FOXL2</i>   | 0.0102042 | 1.010256 | 9.71x10 <sup>-1</sup> | 0.582006 | 1.753621 | 0.820594 | 0.98593  |
| <i>RFPL4B</i>  | 0.0097102 | 1.009757 | 9.71x10 <sup>-1</sup> | 0.59351  | 1.717933 | 0.961842 | 0.98593  |
| <i>NTRK2</i>   | 0.000378  | 1.000378 | 9.80x10 <sup>-1</sup> | 0.971787 | 1.02981  | 0.750296 | 0.991332 |
| <i>CDA</i>     | -0.000588 | 0.999412 | 9.81x10 <sup>-1</sup> | 0.95237  | 1.048777 | 0.673428 | 0.991332 |
| <i>SCUBE1</i>  | 0.0002375 | 1.000238 | 9.94x10 <sup>-1</sup> | 0.94273  | 1.061253 | 0.771519 | 0.997064 |

|               |           |          |                       |          |          |          |          |
|---------------|-----------|----------|-----------------------|----------|----------|----------|----------|
| <i>NCAPH</i>  | -0.000189 | 0.999811 | $9.93 \times 10^{-1}$ | 0.956097 | 1.045524 | 0.709108 | 0.997064 |
| <i>PKNOX2</i> | 0.0010477 | 1.001048 | $9.91 \times 10^{-1}$ | 0.840274 | 1.192584 | 0.835961 | 0.997064 |
| <i>CENPE</i>  | 0.0007214 | 1.000722 | $9.95 \times 10^{-1}$ | 0.799669 | 1.252322 | 0.580086 | 0.997064 |
| <i>POSTN</i>  | -0.003166 | 0.996839 | $9.99 \times 10^{-1}$ | 0.00083  | 1197.183 | 0.776173 | 0.999302 |

---

HR, Hazard Ratio; lower.95, lower limit of 95% confidence interval; upper.95, upper limit of 95% confidence interval; test.ph, P-value of proportional hazards assumption; FDR, false discovery rate.



Table SVII. Results of instrument variable analysis in lung squamous cell carcinoma.

| Gene            | $\beta$   | HR       | P-value               | lower.95 | upper.95 | test.ph  | FDR      |
|-----------------|-----------|----------|-----------------------|----------|----------|----------|----------|
| <i>PREX2</i>    | 0.6718454 | 1.957847 | 1.16x10 <sup>-5</sup> | 1.449894 | 2.643755 | 0.162632 | 0.010737 |
| <i>NPTX2</i>    | 0.0022905 | 1.002293 | 0.001261              | 1.000899 | 1.00369  | 0.12744  | 0.29075  |
| <i>C6orf174</i> | 0.3671208 | 1.443572 | 0.001254              | 1.154989 | 1.80426  | 0.121584 | 0.29075  |
| <i>BARX2</i>    | 0.0832718 | 1.086837 | 0.000707              | 1.035704 | 1.140494 | 0.163005 | 0.29075  |
| <i>CD36</i>     | 0.0102544 | 1.010307 | 0.001687              | 1.003862 | 1.016794 | 0.205887 | 0.31105  |
| <i>SPAG6</i>    | 0.1068655 | 1.112785 | 0.002752              | 1.037602 | 1.193415 | 0.107435 | 0.386999 |
| <i>C20orf56</i> | 0.1239833 | 1.131997 | 0.002938              | 1.043184 | 1.228371 | 0.089783 | 0.386999 |
| <i>C19orf48</i> | -0.034353 | 0.96623  | 0.007242              | 0.942306 | 0.990762 | 0.13019  | 0.598342 |
| <i>ZNF385B</i>  | 0.0821997 | 1.085673 | 0.006026              | 1.023816 | 1.151266 | 0.125872 | 0.598342 |
| <i>ADAMTSL3</i> | 0.1104854 | 1.11682  | 0.006349              | 1.03163  | 1.209045 | 0.111673 | 0.598342 |
| <i>VWF</i>      | 0.003888  | 1.003896 | 0.007164              | 1.001055 | 1.006744 | 0.098784 | 0.598342 |
| <i>FST</i>      | -0.025048 | 0.975263 | 0.007788              | 0.957436 | 0.993422 | 0.152764 | 0.598342 |
| <i>COL22A1</i>  | 0.1655795 | 1.180077 | 0.008988              | 1.042225 | 1.336162 | 0.085856 | 0.60127  |
| <i>MLPH</i>     | 0.0117198 | 1.011789 | 0.00913               | 1.002914 | 1.020742 | 0.160689 | 0.60127  |
| <i>WSCD1</i>    | -0.3154   | 0.729497 | 0.010503              | 0.572934 | 0.928843 | 0.103891 | 0.639058 |

|                  |           |          |          |          |          |          |          |
|------------------|-----------|----------|----------|----------|----------|----------|----------|
| <i>NGFR</i>      | -0.004583 | 0.995427 | 0.01109  | 0.991913 | 0.998954 | 0.081435 | 0.639058 |
| <i>UBE2C</i>     | -0.130803 | 0.877391 | 0.013528 | 0.790876 | 0.973369 | 0.136689 | 0.733672 |
| <i>ICAM4</i>     | -0.116649 | 0.889898 | 0.014744 | 0.810259 | 0.977365 | 0.115076 | 0.75523  |
| <i>LCE1E</i>     | -1.40947  | 0.244273 | 0.064725 | 0.054748 | 1.089895 | 0.123758 | 0.899474 |
| <i>CEACAM5</i>   | -0.002515 | 0.997489 | 0.081771 | 0.994668 | 1.000317 | 0.115466 | 0.899474 |
| <i>KRT5</i>      | -0.000071 | 0.999929 | 0.056264 | 0.999856 | 1.000002 | 0.153111 | 0.899474 |
| <i>SCARF1</i>    | 0.0419925 | 1.042887 | 0.027735 | 1.004609 | 1.082622 | 0.05879  | 0.899474 |
| <i>AK3L1</i>     | -0.078186 | 0.924793 | 0.074359 | 0.848687 | 1.007722 | 0.101914 | 0.899474 |
| <i>LOC642587</i> | -0.004691 | 0.99532  | 0.08061  | 0.990097 | 1.000571 | 0.079897 | 0.899474 |
| <i>SOST</i>      | -0.005815 | 0.994202 | 0.049233 | 0.988457 | 0.99998  | 0.127116 | 0.899474 |
| <i>GRHL3</i>     | -0.008759 | 0.991279 | 0.076007 | 0.981734 | 1.000917 | 0.111432 | 0.899474 |
| <i>HNF1B</i>     | 0.0488753 | 1.050089 | 0.079961 | 0.994181 | 1.109141 | 0.093579 | 0.899474 |
| <i>AGER</i>      | 0.0055775 | 1.005593 | 0.069792 | 0.999549 | 1.011674 | 0.069361 | 0.899474 |
| <i>ETV4</i>      | -0.014925 | 0.985186 | 0.047519 | 0.970751 | 0.999837 | 0.078952 | 0.899474 |
| <i>ODZ2</i>      | -0.004182 | 0.995827 | 0.024041 | 0.992216 | 0.999451 | 0.096196 | 0.899474 |
| <i>DSC3</i>      | -0.001469 | 0.998532 | 0.03403  | 0.997176 | 0.999889 | 0.146008 | 0.899474 |
| <i>ATAD5</i>     | -0.033919 | 0.96665  | 0.068067 | 0.932063 | 1.00252  | 0.068966 | 0.899474 |

|                 |           |          |          |          |          |          |          |
|-----------------|-----------|----------|----------|----------|----------|----------|----------|
| <i>C1orf130</i> | 0.1270043 | 1.135422 | 0.069711 | 0.989817 | 1.302446 | 0.101967 | 0.899474 |
| <i>NR4A1</i>    | 0.0077153 | 1.007745 | 0.046269 | 1.000128 | 1.015421 | 0.12858  | 0.899474 |
| <i>AMTN</i>     | -0.007273 | 0.992753 | 0.027605 | 0.986349 | 0.999198 | 0.188396 | 0.899474 |
| <i>HHATL</i>    | 7.7332589 | 2283.03  | 0.081757 | 0.377307 | 13814274 | 0.130836 | 0.899474 |
| <i>TLL12</i>    | -0.012148 | 0.987925 | 0.03288  | 0.976962 | 0.999012 | 0.088919 | 0.899474 |
| <i>SFRP5</i>    | 0.0648436 | 1.066992 | 0.052317 | 0.99935  | 1.139212 | 0.182844 | 0.899474 |
| <i>C2orf40</i>  | 0.1356667 | 1.1453   | 0.065617 | 0.991274 | 1.323259 | 0.104295 | 0.899474 |
| <i>CD109</i>    | -0.002264 | 0.997739 | 0.052135 | 0.995462 | 1.000021 | 0.092536 | 0.899474 |
| <i>CDC25A</i>   | -0.037532 | 0.963164 | 0.059234 | 0.926328 | 1.001464 | 0.124681 | 0.899474 |
| <i>MT1A</i>     | 0.1080046 | 1.114053 | 0.068747 | 0.991733 | 1.251459 | 0.129747 | 0.899474 |
| <i>GJB6</i>     | -0.001879 | 0.998123 | 0.045265 | 0.996288 | 0.99996  | 0.091525 | 0.899474 |
| <i>TPPP3</i>    | 0.0139142 | 1.014011 | 0.059134 | 0.999464 | 1.028771 | 0.142013 | 0.899474 |
| <i>LMO7</i>     | 0.0043053 | 1.004315 | 0.080474 | 0.999478 | 1.009175 | 0.080152 | 0.899474 |
| <i>SYT7</i>     | 0.0098951 | 1.009944 | 0.075486 | 0.998985 | 1.021024 | 0.083534 | 0.899474 |
| <i>PKP1</i>     | -0.000224 | 0.999776 | 0.075799 | 0.999528 | 1.000023 | 0.137147 | 0.899474 |
| <i>CENPA</i>    | -0.062429 | 0.93948  | 0.081948 | 0.875667 | 1.007944 | 0.123985 | 0.899474 |
| <i>ROBO4</i>    | 0.0294052 | 1.029842 | 0.055896 | 0.99926  | 1.061359 | 0.096359 | 0.899474 |

|                |           |          |          |          |          |          |          |
|----------------|-----------|----------|----------|----------|----------|----------|----------|
| <i>PIGX</i>    | 0.0086039 | 1.008641 | 0.073495 | 0.999182 | 1.01819  | 0.059572 | 0.899474 |
| <i>COL7A1</i>  | -0.001044 | 0.998956 | 0.035853 | 0.997983 | 0.999931 | 0.122967 | 0.899474 |
| <i>CLCA2</i>   | 0.0006808 | 1.000681 | 0.055966 | 0.999983 | 1.00138  | 0.066529 | 0.899474 |
| <i>CPLX3</i>   | -0.960956 | 0.382527 | 0.072301 | 0.134132 | 1.090916 | 0.109806 | 0.899474 |
| <i>MYBL2</i>   | -0.016341 | 0.983791 | 0.048303 | 0.967963 | 0.999878 | 0.139853 | 0.899474 |
| <i>THBS2</i>   | 0.0019347 | 1.001937 | 0.021727 | 1.000283 | 1.003593 | 0.140809 | 0.899474 |
| <i>ITIH5</i>   | 0.0129254 | 1.013009 | 0.035883 | 1.000852 | 1.025314 | 0.164472 | 0.899474 |
| <i>VSTM2B</i>  | 2.3268208 | 10.24532 | 0.075598 | 0.786758 | 133.4165 | 0.156306 | 0.899474 |
| <i>TGFA</i>    | 0.0274116 | 1.027791 | 0.079086 | 0.996821 | 1.059722 | 0.120427 | 0.899474 |
| <i>SH3BP5</i>  | 0.0112016 | 1.011265 | 0.03846  | 1.000595 | 1.022048 | 0.14159  | 0.899474 |
| <i>VIPRI</i>   | -0.046697 | 0.954377 | 0.064501 | 0.908279 | 1.002814 | 0.093921 | 0.899474 |
| <i>CCDC34</i>  | 0.234931  | 1.264822 | 0.0236   | 1.032013 | 1.550149 | 0.059594 | 0.899474 |
| <i>HMGA1</i>   | 0.0026023 | 1.002606 | 0.078464 | 0.999704 | 1.005516 | 0.126385 | 0.899474 |
| <i>FAM83A</i>  | 0.0016869 | 1.001688 | 0.030211 | 1.000161 | 1.003217 | 0.061503 | 0.899474 |
| <i>PENK</i>    | 0.0065584 | 1.00658  | 0.027939 | 1.000711 | 1.012484 | 0.133703 | 0.899474 |
| <i>SMO</i>     | -0.005655 | 0.994361 | 0.057976 | 0.988566 | 1.000191 | 0.07719  | 0.899474 |
| <i>CYP26A1</i> | -0.011044 | 0.989017 | 0.07898  | 0.976905 | 1.001279 | 0.11852  | 0.899474 |

|                 |           |          |          |          |          |          |          |
|-----------------|-----------|----------|----------|----------|----------|----------|----------|
| <i>TUBB2B</i>   | -0.026131 | 0.974207 | 0.079518 | 0.946164 | 1.003082 | 0.092937 | 0.899474 |
| <i>TNXB</i>     | 0.015676  | 1.0158   | 0.081702 | 0.998029 | 1.033886 | 0.112122 | 0.899474 |
| <i>IL22RA1</i>  | -0.064954 | 0.93711  | 0.070776 | 0.873357 | 1.005517 | 0.140542 | 0.899474 |
| <i>SOX14</i>    | 0.2396018 | 1.270743 | 0.050467 | 0.999512 | 1.615576 | 0.142191 | 0.899474 |
| <i>FIGNL1</i>   | 0.1156933 | 1.122651 | 0.076991 | 0.987547 | 1.276239 | 0.103385 | 0.899474 |
| <i>HR</i>       | -0.011207 | 0.988856 | 0.041376 | 0.978264 | 0.999562 | 0.105799 | 0.899474 |
| <i>CLDN5</i>    | 0.0546978 | 1.056221 | 0.069987 | 0.995543 | 1.120598 | 0.107962 | 0.899474 |
| <i>RAD54L</i>   | 0.1427543 | 1.153446 | 0.040783 | 1.006003 | 1.3225   | 0.168179 | 0.899474 |
| <i>TCF21</i>    | 0.0951519 | 1.099826 | 0.064727 | 0.994205 | 1.216668 | 0.119021 | 0.899474 |
| <i>PIP5K1B</i>  | 0.6450453 | 1.906073 | 0.024949 | 1.084578 | 3.349796 | 0.100467 | 0.899474 |
| <i>ALDH1A2</i>  | 0.3430208 | 1.409198 | 0.019808 | 1.055982 | 1.880562 | 0.135663 | 0.899474 |
| <i>FANCA</i>    | 0.0327186 | 1.03326  | 0.034164 | 1.002446 | 1.06502  | 0.074147 | 0.899474 |
| <i>E2F7</i>     | 0.0949789 | 1.099636 | 0.069459 | 0.992466 | 1.218377 | 0.103043 | 0.899474 |
| <i>FBXO32</i>   | -0.069273 | 0.933072 | 0.030167 | 0.876426 | 0.993378 | 0.098438 | 0.899474 |
| <i>NQO1</i>     | -0.001043 | 0.998958 | 0.076289 | 0.997806 | 1.00011  | 0.08952  | 0.899474 |
| <i>KIF23</i>    | 0.0562555 | 1.057868 | 0.041942 | 1.002052 | 1.116793 | 0.052047 | 0.899474 |
| <i>POM121L2</i> | 3.4735543 | 32.25117 | 0.050836 | 0.987442 | 1053.366 | 0.189205 | 0.899474 |

|                  |           |          |          |          |          |          |          |
|------------------|-----------|----------|----------|----------|----------|----------|----------|
| <i>TBX2</i>      | 1.3299341 | 3.780794 | 0.069115 | 0.901123 | 15.86289 | 0.126307 | 0.899474 |
| <i>NPR1</i>      | 0.8592197 | 2.361317 | 0.084192 | 0.890491 | 6.261514 | 0.076759 | 0.913241 |
| <i>RASGRP4</i>   | 0.1497062 | 1.161493 | 0.101679 | 0.970872 | 1.389541 | 0.075097 | 0.925473 |
| <i>DLC1</i>      | 0.0072984 | 1.007325 | 0.098803 | 0.998633 | 1.016092 | 0.10989  | 0.925473 |
| <i>HOXA10</i>    | -0.0233   | 0.976969 | 0.107738 | 0.94962  | 1.005105 | 0.095409 | 0.925473 |
| <i>FRMD6</i>     | -0.002883 | 0.997121 | 0.093829 | 0.993763 | 1.00049  | 0.113711 | 0.925473 |
| <i>SLCIA4</i>    | -0.002434 | 0.997569 | 0.094623 | 0.994726 | 1.00042  | 0.096443 | 0.925473 |
| <i>NRCAM</i>     | -0.002257 | 0.997745 | 0.100718 | 0.995059 | 1.000438 | 0.080374 | 0.925473 |
| <i>MMP1</i>      | -0.010039 | 0.990011 | 0.106406 | 0.97802  | 1.00215  | 0.106687 | 0.925473 |
| <i>LOC146336</i> | -0.747292 | 0.473647 | 0.093818 | 0.19762  | 1.13522  | 0.10033  | 0.925473 |
| <i>LTB4R2</i>    | 0.0451801 | 1.046216 | 0.094245 | 0.992294 | 1.103069 | 0.132393 | 0.925473 |
| <i>SBK1</i>      | -0.007192 | 0.992834 | 0.109411 | 0.984131 | 1.001615 | 0.124331 | 0.925473 |
| <i>FOLH1</i>     | -0.020419 | 0.979788 | 0.104773 | 0.955911 | 1.004261 | 0.112952 | 0.925473 |
| <i>PSAT1</i>     | -0.007025 | 0.993    | 0.094996 | 0.984845 | 1.001222 | 0.086847 | 0.925473 |
| <i>TAC1</i>      | -0.186902 | 0.829525 | 0.109391 | 0.659866 | 1.042806 | 0.112557 | 0.925473 |
| <i>IGFBP3</i>    | -0.000195 | 0.999805 | 0.097025 | 0.999575 | 1.000035 | 0.064102 | 0.925473 |
| <i>PLEKHH2</i>   | -0.085228 | 0.918303 | 0.105168 | 0.828348 | 1.018027 | 0.049394 | 0.925473 |

|                 |           |          |          |          |          |          |          |
|-----------------|-----------|----------|----------|----------|----------|----------|----------|
| <i>ABCA9</i>    | -0.475753 | 0.621417 | 0.097098 | 0.354239 | 1.090109 | 0.068331 | 0.925473 |
| <i>CBX2</i>     | -0.005153 | 0.99486  | 0.089132 | 0.988967 | 1.000788 | 0.100972 | 0.925473 |
| <i>KRT13</i>    | -0.000122 | 0.999878 | 0.105517 | 0.999731 | 1.000026 | 0.123979 | 0.925473 |
| <i>CYB5A</i>    | -0.028464 | 0.971938 | 0.094554 | 0.94004  | 1.004917 | 0.106606 | 0.925473 |
| <i>LRRC32</i>   | 0.02107   | 1.021294 | 0.096702 | 0.996216 | 1.047003 | 0.102101 | 0.925473 |
| <i>C11orf93</i> | -0.009185 | 0.990857 | 0.107098 | 0.979848 | 1.001989 | 0.127756 | 0.925473 |
| <i>ARC</i>      | 0.8660878 | 2.377591 | 0.102276 | 0.841285 | 6.719413 | 0.146073 | 0.925473 |
| <i>UPK1B</i>    | 0.0007823 | 1.000783 | 0.086432 | 0.999888 | 1.001678 | 0.084774 | 0.925473 |
| <i>NR2F1</i>    | -0.12719  | 0.880566 | 0.101205 | 0.756326 | 1.025216 | 0.118244 | 0.925473 |
| <i>GPC1</i>     | -0.000512 | 0.999488 | 0.11337  | 0.998854 | 1.000122 | 0.124424 | 0.933275 |
| <i>C10orf99</i> | -0.012509 | 0.987569 | 0.112603 | 0.972425 | 1.002948 | 0.115096 | 0.933275 |
| <i>ZFP36</i>    | -0.013972 | 0.986125 | 0.112435 | 0.969258 | 1.003285 | 0.047566 | 0.933275 |
| <i>PHGDH</i>    | -0.004273 | 0.995736 | 0.115771 | 0.990448 | 1.001052 | 0.10711  | 0.936323 |
| <i>CTSH</i>     | 0.0080948 | 1.008128 | 0.114788 | 0.998036 | 1.018321 | 0.122096 | 0.936323 |
| <i>PLEKHG6</i>  | -0.007332 | 0.992695 | 0.118621 | 0.983596 | 1.001878 | 0.10641  | 0.939116 |
| <i>FGR</i>      | 0.0184777 | 1.018649 | 0.117845 | 0.995331 | 1.042514 | 0.093516 | 0.939116 |
| <i>SPOCK1</i>   | -0.009873 | 0.990176 | 0.119172 | 0.977956 | 1.002548 | 0.106711 | 0.939116 |

|                |           |          |          |          |          |          |          |
|----------------|-----------|----------|----------|----------|----------|----------|----------|
| <i>TBX4</i>    | 0.0728546 | 1.075574 | 0.138166 | 0.976819 | 1.184313 | 0.089716 | 0.942454 |
| <i>TMEM40</i>  | -0.01872  | 0.981454 | 0.289626 | 0.948031 | 1.016056 | 0.05979  | 0.942454 |
| <i>ATP12A</i>  | 0.0340316 | 1.034617 | 0.280242 | 0.97264  | 1.100544 | 0.096121 | 0.942454 |
| <i>GRIA1</i>   | 0.0820619 | 1.085523 | 0.15854  | 0.968499 | 1.216687 | 0.11055  | 0.942454 |
| <i>NKX2-4</i>  | 0.4730731 | 1.604919 | 0.212613 | 0.762748 | 3.376953 | 0.085031 | 0.942454 |
| <i>TSKU</i>    | -0.001745 | 0.998257 | 0.264112 | 0.995204 | 1.001318 | 0.07311  | 0.942454 |
| <i>CCNB1</i>   | 0.0088917 | 1.008931 | 0.157165 | 0.996578 | 1.021437 | 0.051956 | 0.942454 |
| <i>GINS4</i>   | 0.0164429 | 1.016579 | 0.2903   | 0.986065 | 1.048037 | 0.061195 | 0.942454 |
| <i>GJB5</i>    | -0.005927 | 0.994091 | 0.210662 | 0.984908 | 1.003359 | 0.111717 | 0.942454 |
| <i>CALML3</i>  | -0.000672 | 0.999329 | 0.13504  | 0.998449 | 1.000209 | 0.073385 | 0.942454 |
| <i>PRC1</i>    | -0.004457 | 0.995553 | 0.197289 | 0.98883  | 1.002321 | 0.091812 | 0.942454 |
| <i>ADAM12</i>  | -0.03195  | 0.968555 | 0.250506 | 0.917185 | 1.022801 | 0.105706 | 0.942454 |
| <i>RRM2</i>    | -0.006757 | 0.993266 | 0.233084 | 0.982297 | 1.004358 | 0.124166 | 0.942454 |
| <i>ARTN</i>    | -0.00478  | 0.995231 | 0.252079 | 0.987123 | 1.003406 | 0.101204 | 0.942454 |
| <i>SLC26A9</i> | 0.0206479 | 1.020863 | 0.28294  | 0.983102 | 1.060073 | 0.158681 | 0.942454 |
| <i>TCL1B</i>   | 0.051125  | 1.052454 | 0.23407  | 0.967458 | 1.144919 | 0.088403 | 0.942454 |
| <i>PEAR1</i>   | 0.0479734 | 1.049143 | 0.251525 | 0.966545 | 1.138798 | 0.112949 | 0.942454 |



|                  |           |          |          |          |          |          |          |
|------------------|-----------|----------|----------|----------|----------|----------|----------|
| <i>DMRT2</i>     | -0.007279 | 0.992748 | 0.260266 | 0.980247 | 1.005408 | 0.073064 | 0.942454 |
| <i>UGT1A6</i>    | -0.000883 | 0.999118 | 0.15145  | 0.997913 | 1.000324 | 0.090782 | 0.942454 |
| <i>SERPINB13</i> | -0.003746 | 0.996261 | 0.140005 | 0.991317 | 1.00123  | 0.087294 | 0.942454 |
| <i>RAX</i>       | -0.249307 | 0.779341 | 0.185994 | 0.538603 | 1.12768  | 0.105952 | 0.942454 |
| <i>NGEF</i>      | 0.0369057 | 1.037595 | 0.252986 | 0.973973 | 1.105373 | 0.080368 | 0.942454 |
| <i>RAPGEFL1</i>  | -0.001641 | 0.998361 | 0.211994 | 0.995792 | 1.000936 | 0.071814 | 0.942454 |
| <i>CBLC</i>      | -0.008018 | 0.992014 | 0.241146 | 0.978802 | 1.005404 | 0.090142 | 0.942454 |
| <i>SFTA3</i>     | 0.0072993 | 1.007326 | 0.178821 | 0.996663 | 1.018103 | 0.091739 | 0.942454 |
| <i>CCDC108</i>   | 0.1118047 | 1.118294 | 0.181261 | 0.949225 | 1.317477 | 0.082722 | 0.942454 |
| <i>CI6orf74</i>  | -0.011087 | 0.988974 | 0.270181 | 0.969674 | 1.008658 | 0.116721 | 0.942454 |
| <i>ANKRD22</i>   | 0.0161078 | 1.016238 | 0.267467 | 0.987714 | 1.045586 | 0.129004 | 0.942454 |
| <i>KRT15</i>     | -0.000159 | 0.999841 | 0.141965 | 0.99963  | 1.000053 | 0.084785 | 0.942454 |
| <i>TRIM29</i>    | -0.000514 | 0.999486 | 0.169997 | 0.998752 | 1.00022  | 0.088641 | 0.942454 |
| <i>TMPRSS4</i>   | -0.000953 | 0.999047 | 0.123044 | 0.997837 | 1.000258 | 0.096543 | 0.942454 |
| <i>ADAM23</i>    | -0.001328 | 0.998673 | 0.199881 | 0.996648 | 1.000703 | 0.12421  | 0.942454 |
| <i>CPA3</i>      | 0.018576  | 1.01875  | 0.282622 | 0.984807 | 1.053862 | 0.09593  | 0.942454 |
| <i>FBXO27</i>    | -0.003215 | 0.99679  | 0.189783 | 0.992012 | 1.001592 | 0.071716 | 0.942454 |

|                 |           |          |          |          |          |          |          |
|-----------------|-----------|----------|----------|----------|----------|----------|----------|
| <i>CYP4F11</i>  | -0.000943 | 0.999057 | 0.245726 | 0.997468 | 1.000649 | 0.072564 | 0.942454 |
| <i>LGALS7B</i>  | -0.001656 | 0.998346 | 0.284043 | 0.995326 | 1.001375 | 0.073516 | 0.942454 |
| <i>CHIA</i>     | 0.1114206 | 1.117865 | 0.26277  | 0.919813 | 1.358561 | 0.15585  | 0.942454 |
| <i>SIPR4</i>    | 0.0923482 | 1.096747 | 0.169818 | 0.96127  | 1.251316 | 0.134196 | 0.942454 |
| <i>C1orf68</i>  | -1.453655 | 0.233714 | 0.257633 | 0.018863 | 2.895675 | 0.120696 | 0.942454 |
| <i>NDRG1</i>    | -0.000169 | 0.999831 | 0.290196 | 0.999518 | 1.000144 | 0.09214  | 0.942454 |
| <i>ALDH3A1</i>  | -0.00018  | 0.99982  | 0.18653  | 0.999553 | 1.000087 | 0.111461 | 0.942454 |
| <i>KIAA0802</i> | 0.1965278 | 1.217169 | 0.196848 | 0.903091 | 1.640478 | 0.08995  | 0.942454 |
| <i>LADI</i>     | 0.0015433 | 1.001544 | 0.201816 | 0.999174 | 1.003921 | 0.087012 | 0.942454 |
| <i>CBR3</i>     | -0.004719 | 0.995293 | 0.141707 | 0.989048 | 1.001576 | 0.136551 | 0.942454 |
| <i>MUC21</i>    | 0.0412627 | 1.042126 | 0.173302 | 0.982033 | 1.105896 | 0.132929 | 0.942454 |
| <i>C1orf106</i> | -0.006332 | 0.993688 | 0.183287 | 0.984465 | 1.002999 | 0.111633 | 0.942454 |
| <i>KLHDC7B</i>  | -0.002131 | 0.997871 | 0.14925  | 0.994984 | 1.000766 | 0.094254 | 0.942454 |
| <i>PHOX2A</i>   | 0.9789834 | 2.661749 | 0.282626 | 0.44626  | 15.8762  | 0.079612 | 0.942454 |
| <i>DKK4</i>     | -0.180421 | 0.834918 | 0.2642   | 0.608269 | 1.14602  | 0.095852 | 0.942454 |
| <i>FPR1</i>     | 0.0204925 | 1.020704 | 0.210906 | 0.988456 | 1.054004 | 0.122195 | 0.942454 |
| <i>CCDC19</i>   | 0.0626526 | 1.064657 | 0.261179 | 0.954435 | 1.187607 | 0.077759 | 0.942454 |

|                 |           |          |          |          |          |          |          |
|-----------------|-----------|----------|----------|----------|----------|----------|----------|
| <i>FNDC1</i>    | -0.004834 | 0.995178 | 0.271847 | 0.986634 | 1.003795 | 0.037239 | 0.942454 |
| <i>VWA3B</i>    | 0.1195044 | 1.126938 | 0.153911 | 0.956222 | 1.328133 | 0.093079 | 0.942454 |
| <i>PVRL4</i>    | -0.002069 | 0.997933 | 0.219732 | 0.994641 | 1.001236 | 0.06394  | 0.942454 |
| <i>CXCL13</i>   | -0.002348 | 0.997655 | 0.287058 | 0.993351 | 1.001977 | 0.1007   | 0.942454 |
| <i>C17orf72</i> | -0.04443  | 0.956543 | 0.258474 | 0.885599 | 1.033171 | 0.058493 | 0.942454 |
| <i>S100A8</i>   | 0.0008702 | 1.000871 | 0.198548 | 0.999544 | 1.002199 | 0.071579 | 0.942454 |
| <i>PDK4</i>     | 0.01146   | 1.011526 | 0.288963 | 0.990325 | 1.03318  | 0.096336 | 0.942454 |
| <i>FGF19</i>    | 0.0071069 | 1.007132 | 0.180651 | 0.996708 | 1.017666 | 0.103144 | 0.942454 |
| <i>PCDH12</i>   | 0.0323395 | 1.032868 | 0.279944 | 0.974018 | 1.095274 | 0.102912 | 0.942454 |
| <i>TFAP2C</i>   | -0.018871 | 0.981306 | 0.282276 | 0.948123 | 1.015649 | 0.124771 | 0.942454 |
| <i>MRAP2</i>    | -0.008472 | 0.991564 | 0.145118 | 0.980328 | 1.002929 | 0.088797 | 0.942454 |
| <i>UNC93A</i>   | 0.5526581 | 1.737866 | 0.236648 | 0.695824 | 4.340433 | 0.088783 | 0.942454 |
| <i>BEST2</i>    | -0.28704  | 0.750482 | 0.269434 | 0.450922 | 1.249047 | 0.105927 | 0.942454 |
| <i>HYDIN</i>    | -0.06037  | 0.941416 | 0.253126 | 0.848819 | 1.044114 | 0.081842 | 0.942454 |
| <i>HHIP</i>     | 0.0278769 | 1.028269 | 0.171234 | 0.988017 | 1.070161 | 0.094024 | 0.942454 |
| <i>SOX15</i>    | -0.004207 | 0.995802 | 0.226114 | 0.989043 | 1.002608 | 0.109217 | 0.942454 |
| <i>KLK10</i>    | -0.003514 | 0.996492 | 0.243371 | 0.990627 | 1.002392 | 0.144493 | 0.942454 |

|                 |           |          |          |          |          |          |          |
|-----------------|-----------|----------|----------|----------|----------|----------|----------|
| <i>FILIP1</i>   | 0.0714476 | 1.074062 | 0.141906 | 0.976387 | 1.181508 | 0.084389 | 0.942454 |
| <i>LRRC15</i>   | -0.00471  | 0.995301 | 0.259086 | 0.987193 | 1.003476 | 0.06222  | 0.942454 |
| <i>HTR1E</i>    | 0.7942259 | 2.212727 | 0.164659 | 0.721795 | 6.783312 | 0.149035 | 0.942454 |
| <i>KL</i>       | 0.0937941 | 1.098334 | 0.274099 | 0.928399 | 1.299373 | 0.133483 | 0.942454 |
| <i>TMPRSS2</i>  | 0.0080544 | 1.008087 | 0.211013 | 0.995444 | 1.020891 | 0.095992 | 0.942454 |
| <i>GBX2</i>     | -0.404134 | 0.667554 | 0.274703 | 0.323261 | 1.37854  | 0.127516 | 0.942454 |
| <i>ZBTB16</i>   | 0.1075037 | 1.113495 | 0.230936 | 0.933903 | 1.327623 | 0.099677 | 0.942454 |
| <i>PLEKHG4B</i> | -0.006513 | 0.993509 | 0.180132 | 0.984092 | 1.003015 | 0.07917  | 0.942454 |
| <i>C13orf15</i> | 0.0117604 | 1.01183  | 0.154184 | 0.995594 | 1.028331 | 0.08054  | 0.942454 |
| <i>KIFC1</i>    | -0.009913 | 0.990136 | 0.152257 | 0.976788 | 1.003665 | 0.077767 | 0.942454 |
| <i>ANLN</i>     | 0.0104006 | 1.010455 | 0.287111 | 0.991289 | 1.029991 | 0.072302 | 0.942454 |
| <i>CA7</i>      | -3.119562 | 0.044177 | 0.160842 | 0.000564 | 3.458224 | 0.082265 | 0.942454 |
| <i>RNASE1</i>   | 0.0018049 | 1.001806 | 0.157625 | 0.999302 | 1.004317 | 0.147425 | 0.942454 |
| <i>NRARP</i>    | -0.003344 | 0.996662 | 0.208526 | 0.991482 | 1.001869 | 0.101835 | 0.942454 |
| <i>RHBDL2</i>   | -0.02934  | 0.971086 | 0.211431 | 0.927412 | 1.016817 | 0.082893 | 0.942454 |
| <i>FAM162B</i>  | 0.2114341 | 1.235449 | 0.139713 | 0.933174 | 1.635636 | 0.105159 | 0.942454 |
| <i>FOLR1</i>    | 0.0121763 | 1.012251 | 0.256257 | 0.991194 | 1.033755 | 0.109816 | 0.942454 |

|                 |           |          |          |          |          |          |          |
|-----------------|-----------|----------|----------|----------|----------|----------|----------|
| <i>GABRP</i>    | -0.003248 | 0.996757 | 0.177184 | 0.992065 | 1.001471 | 0.119405 | 0.942454 |
| <i>GPRIN1</i>   | -0.059776 | 0.941975 | 0.251596 | 0.85047  | 1.043326 | 0.117847 | 0.942454 |
| <i>GDF10</i>    | 0.1277488 | 1.136268 | 0.159431 | 0.951031 | 1.357583 | 0.091096 | 0.942454 |
| <i>PNMA2</i>    | 0.1173698 | 1.124535 | 0.265097 | 0.914799 | 1.382358 | 0.068984 | 0.942454 |
| <i>C1orf116</i> | 0.015775  | 1.0159   | 0.226404 | 0.990263 | 1.0422   | 0.055313 | 0.942454 |
| <i>DSG2</i>     | 0.0063156 | 1.006336 | 0.228347 | 0.996048 | 1.01673  | 0.086081 | 0.942454 |
| <i>GCLC</i>     | -0.000561 | 0.99944  | 0.201646 | 0.99858  | 1.0003   | 0.109596 | 0.942454 |
| <i>CCDC68</i>   | 0.0365675 | 1.037244 | 0.224124 | 0.977859 | 1.100236 | 0.102441 | 0.942454 |
| <i>DKK1</i>     | -0.01042  | 0.989634 | 0.13535  | 0.976191 | 1.003261 | 0.101917 | 0.942454 |
| <i>TROAP</i>    | -0.023176 | 0.97709  | 0.144014 | 0.947179 | 1.007946 | 0.123809 | 0.942454 |
| <i>ADH7</i>     | -0.000762 | 0.999238 | 0.178443 | 0.998129 | 1.000348 | 0.106039 | 0.942454 |
| <i>C10orf10</i> | 0.0163176 | 1.016451 | 0.196051 | 0.991616 | 1.041909 | 0.099925 | 0.942454 |
| <i>RRAD</i>     | 0.0071709 | 1.007197 | 0.259114 | 0.99473  | 1.019819 | 0.125863 | 0.942454 |
| <i>NXPH4</i>    | -0.009986 | 0.990064 | 0.178374 | 0.975769 | 1.004568 | 0.082774 | 0.942454 |
| <i>CAMKV</i>    | 0.3203785 | 1.377649 | 0.243475 | 0.804128 | 2.360216 | 0.129102 | 0.942454 |
| <i>SCGB3A2</i>  | 0.2010699 | 1.22271  | 0.262377 | 0.860237 | 1.737917 | 0.131146 | 0.942454 |
| <i>ALDH2</i>    | -0.003978 | 0.996029 | 0.224125 | 0.989661 | 1.002439 | 0.083249 | 0.942454 |

|                |           |          |          |          |          |          |          |
|----------------|-----------|----------|----------|----------|----------|----------|----------|
| <i>ASPM</i>    | -0.071276 | 0.931205 | 0.185963 | 0.837865 | 1.034943 | 0.106132 | 0.942454 |
| <i>IL6</i>     | -0.017245 | 0.982902 | 0.172253 | 0.958863 | 1.007545 | 0.115931 | 0.942454 |
| <i>PANX2</i>   | -0.004252 | 0.995757 | 0.255265 | 0.988488 | 1.003078 | 0.087328 | 0.942454 |
| <i>DMBT1</i>   | 0.0033908 | 1.003397 | 0.222052 | 0.99795  | 1.008872 | 0.096205 | 0.942454 |
| <i>MMP13</i>   | -0.000719 | 0.999281 | 0.174305 | 0.998245 | 1.000318 | 0.101015 | 0.942454 |
| <i>BCL6B</i>   | 0.0496252 | 1.050877 | 0.27928  | 0.960528 | 1.149725 | 0.167869 | 0.942454 |
| <i>SLC2A1</i>  | 0.0001867 | 1.000187 | 0.236783 | 0.999877 | 1.000496 | 0.083041 | 0.942454 |
| <i>ATP11A</i>  | 0.0046835 | 1.004695 | 0.205931 | 0.997429 | 1.012013 | 0.080507 | 0.942454 |
| <i>SUSD4</i>   | -0.004143 | 0.995865 | 0.238986 | 0.989021 | 1.002757 | 0.096017 | 0.942454 |
| <i>CA4</i>     | 0.3346855 | 1.397501 | 0.146338 | 0.889672 | 2.195202 | 0.093951 | 0.942454 |
| <i>ADM2</i>    | -0.030866 | 0.969605 | 0.221625 | 0.922781 | 1.018806 | 0.119309 | 0.942454 |
| <i>COBL</i>    | 0.0188878 | 1.019067 | 0.159153 | 0.992622 | 1.046218 | 0.075463 | 0.942454 |
| <i>FABP3</i>   | 0.1971522 | 1.217929 | 0.146648 | 0.933263 | 1.589425 | 0.115996 | 0.942454 |
| <i>C4orf31</i> | 0.0242715 | 1.024568 | 0.170907 | 0.989585 | 1.060789 | 0.100813 | 0.942454 |
| <i>AQP4</i>    | 0.008212  | 1.008246 | 0.168281 | 0.996536 | 1.020094 | 0.10404  | 0.942454 |
| <i>SLC44A5</i> | 0.0655544 | 1.067751 | 0.236835 | 0.957854 | 1.190257 | 0.082637 | 0.942454 |
| <i>CD55</i>    | 0.009555  | 1.009601 | 0.193881 | 0.995152 | 1.024259 | 0.076753 | 0.942454 |

|                |           |          |          |          |          |          |          |
|----------------|-----------|----------|----------|----------|----------|----------|----------|
| <i>EIF5A2</i>  | 0.0098642 | 1.009913 | 0.190168 | 0.995119 | 1.024927 | 0.084158 | 0.942454 |
| <i>KCNT2</i>   | 0.183046  | 1.20087  | 0.207562 | 0.903373 | 1.596338 | 0.121994 | 0.942454 |
| <i>RAB17</i>   | 0.0229391 | 1.023204 | 0.126616 | 0.993528 | 1.053767 | 0.085847 | 0.942454 |
| <i>SI00A9</i>  | 0.000081  | 1.000081 | 0.213415 | 0.999953 | 1.000209 | 0.08973  | 0.942454 |
| <i>SYT10</i>   | 0.7845798 | 2.191486 | 0.239908 | 0.592206 | 8.109693 | 0.105844 | 0.942454 |
| <i>SLC4A11</i> | -0.004705 | 0.995306 | 0.164496 | 0.988726 | 1.00193  | 0.084613 | 0.942454 |
| <i>RORC</i>    | -0.019528 | 0.980661 | 0.129067 | 0.956241 | 1.005705 | 0.125762 | 0.942454 |
| <i>DSCC1</i>   | 0.1321483 | 1.141278 | 0.238068 | 0.916329 | 1.421449 | 0.104863 | 0.942454 |
| <i>NEDD9</i>   | -0.004978 | 0.995034 | 0.251627 | 0.986601 | 1.003539 | 0.098554 | 0.942454 |
| <i>NTRK2</i>   | -0.000417 | 0.999583 | 0.2693   | 0.998844 | 1.000323 | 0.066856 | 0.942454 |
| <i>FAM83C</i>  | -0.013327 | 0.986762 | 0.207818 | 0.96651  | 1.007438 | 0.075912 | 0.942454 |
| <i>BCL11A</i>  | 0.0060483 | 1.006067 | 0.250804 | 0.995735 | 1.016506 | 0.048417 | 0.942454 |
| <i>CNR1</i>    | 0.075833  | 1.078782 | 0.158598 | 0.970841 | 1.198726 | 0.124748 | 0.942454 |
| <i>SLIT3</i>   | 0.0510287 | 1.052353 | 0.287912 | 0.957831 | 1.156203 | 0.100665 | 0.942454 |
| <i>CGNL1</i>   | -0.03313  | 0.967412 | 0.215418 | 0.91801  | 1.019474 | 0.080249 | 0.942454 |
| <i>EDARADD</i> | -0.003582 | 0.996424 | 0.221589 | 0.990718 | 1.002164 | 0.093577 | 0.942454 |
| <i>NRIP3</i>   | 0.0951219 | 1.099793 | 0.279198 | 0.925737 | 1.306574 | 0.176972 | 0.942454 |

|                |           |          |          |          |          |          |          |
|----------------|-----------|----------|----------|----------|----------|----------|----------|
| <i>SLC4A4</i>  | -0.078451 | 0.924547 | 0.249946 | 0.808883 | 1.056751 | 0.097939 | 0.942454 |
| <i>SCN4B</i>   | -0.036142 | 0.964503 | 0.203492 | 0.912245 | 1.019755 | 0.118495 | 0.942454 |
| <i>KRT80</i>   | -0.01557  | 0.984551 | 0.167872 | 0.963004 | 1.00658  | 0.08686  | 0.942454 |
| <i>RNASE7</i>  | -0.012066 | 0.988007 | 0.288732 | 0.966226 | 1.010278 | 0.067996 | 0.942454 |
| <i>PRAMI</i>   | 0.1911196 | 1.210604 | 0.150763 | 0.932783 | 1.571172 | 0.038962 | 0.942454 |
| <i>GPRC5A</i>  | 0.0047021 | 1.004713 | 0.220311 | 0.997187 | 1.012296 | 0.080049 | 0.942454 |
| <i>SC65</i>    | -0.004612 | 0.995399 | 0.181799 | 0.988683 | 1.00216  | 0.072289 | 0.942454 |
| <i>BAI2</i>    | -0.025774 | 0.974555 | 0.148434 | 0.941076 | 1.009226 | 0.09096  | 0.942454 |
| <i>ATOH8</i>   | -0.106908 | 0.898608 | 0.248826 | 0.749306 | 1.077659 | 0.093023 | 0.942454 |
| <i>COL9A2</i>  | -0.002226 | 0.997776 | 0.266423 | 0.993866 | 1.001702 | 0.089823 | 0.942454 |
| <i>RAMP3</i>   | 0.0562118 | 1.057822 | 0.175665 | 0.97517  | 1.147479 | 0.094362 | 0.942454 |
| <i>PLA2G4F</i> | -0.179929 | 0.83533  | 0.1999   | 0.63442  | 1.099865 | 0.095486 | 0.942454 |
| <i>SLC39A8</i> | 0.0169179 | 1.017062 | 0.191138 | 0.991588 | 1.04319  | 0.040927 | 0.942454 |
| <i>RAD54B</i>  | 0.0774938 | 1.080576 | 0.185066 | 0.963571 | 1.211788 | 0.115715 | 0.942454 |
| <i>CDT1</i>    | -0.159041 | 0.852961 | 0.20699  | 0.666267 | 1.091969 | 0.119432 | 0.942454 |
| <i>ITLN2</i>   | -0.128732 | 0.87921  | 0.28249  | 0.695242 | 1.111857 | 0.075523 | 0.942454 |
| <i>CYB5R2</i>  | -0.009653 | 0.990393 | 0.135917 | 0.977907 | 1.003039 | 0.146827 | 0.942454 |



|                 |           |                       |          |          |          |          |          |
|-----------------|-----------|-----------------------|----------|----------|----------|----------|----------|
| <i>DEPDC1B</i>  | -0.13715  | 0.87184               | 0.155221 | 0.721607 | 1.05335  | 0.115796 | 0.942454 |
| <i>SCG2</i>     | -0.019241 | 0.980943              | 0.239456 | 0.949995 | 1.0129   | 0.054439 | 0.942454 |
| <i>MIAT</i>     | -0.005178 | 0.994836              | 0.182228 | 0.987296 | 1.002433 | 0.08229  | 0.942454 |
| <i>ACRV1</i>    | -9.84567  | 5.30x10 <sup>-5</sup> | 0.122091 | 0.000000 | 13.95557 | 0.119936 | 0.942454 |
| <i>SERPINB2</i> | -0.006027 | 0.993992              | 0.213212 | 0.984604 | 1.003468 | 0.08567  | 0.942454 |
| <i>LRRK2</i>    | -0.431401 | 0.649598              | 0.241615 | 0.315535 | 1.33734  | 0.079349 | 0.942454 |
| <i>FBN2</i>     | -0.00245  | 0.997553              | 0.189854 | 0.993905 | 1.001214 | 0.172521 | 0.942454 |
| <i>SPRR1B</i>   | -0.00614  | 0.993879              | 0.245416 | 0.983635 | 1.004229 | 0.084028 | 0.942454 |
| <i>HBA2</i>     | 0.0166312 | 1.01677               | 0.272086 | 0.987036 | 1.0474   | 0.113375 | 0.942454 |
| <i>PAICS</i>    | -0.012532 | 0.987546              | 0.140289 | 0.971234 | 1.004132 | 0.092366 | 0.942454 |
| <i>KCNC1</i>    | -0.715212 | 0.489088              | 0.196076 | 0.16538  | 1.446408 | 0.107718 | 0.942454 |
| <i>ACOXL</i>    | 3.4398817 | 31.18327              | 0.144747 | 0.306294 | 3174.718 | 0.088708 | 0.942454 |
| <i>NCAPD2</i>   | -0.001964 | 0.998038              | 0.146666 | 0.995394 | 1.000688 | 0.146338 | 0.942454 |
| <i>NR3C2</i>    | 0.3481739 | 1.416479              | 0.187573 | 0.843945 | 2.377421 | 0.188452 | 0.942454 |
| <i>ITGA6</i>    | 0.0130523 | 1.013138              | 0.299053 | 0.988485 | 1.038406 | 0.060496 | 0.949412 |
| <i>AATK</i>     | 0.0810701 | 1.084447              | 0.294647 | 0.931882 | 1.26199  | 0.116621 | 0.949412 |
| <i>WIF1</i>     | 0.0020594 | 1.002061              | 0.297425 | 0.998187 | 1.005951 | 0.100816 | 0.949412 |

|                        |           |          |          |          |          |          |          |
|------------------------|-----------|----------|----------|----------|----------|----------|----------|
| <i>LILRA5</i>          | -0.079747 | 0.92335  | 0.29897  | 0.79435  | 1.0733   | 0.093771 | 0.949412 |
| <i>FZD10</i>           | 0.0061373 | 1.006156 | 0.297185 | 0.994613 | 1.017833 | 0.078581 | 0.949412 |
| <i>DIO2</i>            | -0.01028  | 0.989773 | 0.299652 | 0.970732 | 1.009188 | 0.104488 | 0.949412 |
| <i>F2RL2</i>           | -0.004629 | 0.995382 | 0.298679 | 0.98673  | 1.004109 | 0.086892 | 0.949412 |
| <i>ST6GALNA<br/>C5</i> | 0.0668735 | 1.06916  | 0.307892 | 0.940193 | 1.215817 | 0.109078 | 0.951129 |
| <i>PDE4C</i>           | 0.0679834 | 1.070348 | 0.308446 | 0.939091 | 1.21995  | 0.075117 | 0.951129 |
| <i>FOXA2</i>           | 0.0213011 | 1.02153  | 0.303018 | 0.980951 | 1.063787 | 0.106665 | 0.951129 |
| <i>SMOX</i>            | 0.0471691 | 1.048299 | 0.302256 | 0.95844  | 1.146583 | 0.044011 | 0.951129 |
| <i>UGT2A1</i>          | 0.0075113 | 1.00754  | 0.306276 | 0.993145 | 1.022143 | 0.085989 | 0.951129 |
| <i>NCKAP5</i>          | -0.026643 | 0.973709 | 0.306274 | 0.925255 | 1.024699 | 0.108637 | 0.951129 |
| <i>HSPB7</i>           | 0.1359742 | 1.145652 | 0.307064 | 0.882545 | 1.487199 | 0.090088 | 0.951129 |
| <i>C16orf89</i>        | 0.0180377 | 1.018201 | 0.305042 | 0.983704 | 1.053909 | 0.106847 | 0.951129 |
| <i>SLC46A2</i>         | 0.2906115 | 1.337245 | 0.309737 | 0.763279 | 2.342817 | 0.100609 | 0.951925 |
| <i>ILIF9</i>           | -0.019529 | 0.980661 | 0.320577 | 0.943589 | 1.019188 | 0.075566 | 0.953793 |
| <i>LOC149620</i>       | 0.6136405 | 1.847144 | 0.323022 | 0.546976 | 6.237828 | 0.105034 | 0.953793 |
| <i>SDPR</i>            | 0.0036048 | 1.003611 | 0.322929 | 0.996463 | 1.010811 | 0.068344 | 0.953793 |

|                 |           |          |          |          |          |          |          |
|-----------------|-----------|----------|----------|----------|----------|----------|----------|
| <i>CYP4B1</i>   | 0.0079734 | 1.008005 | 0.315876 | 0.992421 | 1.023834 | 0.087044 | 0.953793 |
| <i>CD34</i>     | 0.0077833 | 1.007814 | 0.31841  | 0.992522 | 1.023341 | 0.107975 | 0.953793 |
| <i>PHACTR1</i>  | 0.2078294 | 1.231003 | 0.321705 | 0.816095 | 1.856854 | 0.102811 | 0.953793 |
| <i>TNFRSF18</i> | 0.0124793 | 1.012557 | 0.320836 | 0.987915 | 1.037815 | 0.089234 | 0.953793 |
| <i>C4orf26</i>  | -0.165351 | 0.847596 | 0.322863 | 0.610685 | 1.176415 | 0.09901  | 0.953793 |
| <i>DOK2</i>     | -0.017939 | 0.982221 | 0.323793 | 0.947837 | 1.017852 | 0.07437  | 0.953793 |
| <i>XDH</i>      | 0.017199  | 1.017348 | 0.312671 | 0.983942 | 1.051888 | 0.088282 | 0.953793 |
| <i>SIX2</i>     | -0.006338 | 0.993682 | 0.319363 | 0.981364 | 1.006156 | 0.108392 | 0.953793 |
| <i>COL3A1</i>   | 0.0001861 | 1.000186 | 0.321866 | 0.999818 | 1.000554 | 0.080104 | 0.953793 |
| <i>LGALS7</i>   | -0.002761 | 0.997242 | 0.31421  | 0.991894 | 1.00262  | 0.109798 | 0.953793 |
| <i>SLC34A2</i>  | 0.000314  | 1.000314 | 0.338533 | 0.999671 | 1.000957 | 0.091571 | 0.956457 |
| <i>MS4A8B</i>   | 0.0332633 | 1.033823 | 0.331102 | 0.966749 | 1.105551 | 0.101107 | 0.956457 |
| <i>ALDH3B1</i>  | 0.0059765 | 1.005994 | 0.341574 | 0.99368  | 1.018461 | 0.108233 | 0.956457 |
| <i>MAFA</i>     | -0.23156  | 0.793295 | 0.348101 | 0.489063 | 1.286781 | 0.093775 | 0.956457 |
| <i>F10</i>      | 0.3106108 | 1.364258 | 0.346669 | 0.71441  | 2.605226 | 0.168327 | 0.956457 |
| <i>FKBP4</i>    | -0.001282 | 0.998719 | 0.332949 | 0.99613  | 1.001314 | 0.055704 | 0.956457 |
| <i>PAR6G</i>    | 0.0243349 | 1.024633 | 0.326893 | 0.975979 | 1.075714 | 0.05627  | 0.956457 |

|                 |           |          |          |          |          |          |          |
|-----------------|-----------|----------|----------|----------|----------|----------|----------|
| <i>SIX4</i>     | -0.011683 | 0.988385 | 0.343998 | 0.964757 | 1.012593 | 0.08188  | 0.956457 |
| <i>ENG</i>      | -1.059995 | 0.346458 | 0.331616 | 0.040767 | 2.944395 | 0.093496 | 0.956457 |
| <i>ARRB1</i>    | -0.036129 | 0.964516 | 0.349481 | 0.894209 | 1.04035  | 0.091827 | 0.956457 |
| <i>GKN2</i>     | 0.126656  | 1.135027 | 0.337986 | 0.875967 | 1.470701 | 0.089744 | 0.956457 |
| <i>UHRF1</i>    | 0.0107164 | 1.010774 | 0.348562 | 0.988378 | 1.033678 | 0.070748 | 0.956457 |
| <i>KANK3</i>    | 0.0740374 | 1.076847 | 0.33049  | 0.927669 | 1.250014 | 0.054596 | 0.956457 |
| <i>C5orf13</i>  | -0.000718 | 0.999282 | 0.347474 | 0.997787 | 1.00078  | 0.103746 | 0.956457 |
| <i>HIGD1B</i>   | -0.297301 | 0.742821 | 0.349594 | 0.398417 | 1.384938 | 0.093123 | 0.956457 |
| <i>PLOD2</i>    | 0.0010743 | 1.001075 | 0.341216 | 0.998863 | 1.003292 | 0.109081 | 0.956457 |
| <i>PROM2</i>    | -0.00059  | 0.99941  | 0.330548 | 0.998222 | 1.000599 | 0.097033 | 0.956457 |
| <i>PPP1R14A</i> | 0.0342161 | 1.034808 | 0.342204 | 0.964265 | 1.110512 | 0.117789 | 0.956457 |
| <i>PCSK2</i>    | 0.0272841 | 1.02766  | 0.348819 | 0.970645 | 1.088023 | 0.069135 | 0.956457 |
| <i>CCNE1</i>    | -0.209032 | 0.811369 | 0.339091 | 0.52856  | 1.245499 | 0.114718 | 0.956457 |
| <i>PGBD5</i>    | -0.005507 | 0.994508 | 0.341072 | 0.983296 | 1.005848 | 0.079992 | 0.956457 |
| <i>C1orf88</i>  | -0.357486 | 0.699433 | 0.343831 | 0.333654 | 1.46621  | 0.072302 | 0.956457 |
| <i>PID1</i>     | 0.1709586 | 1.186442 | 0.341638 | 0.834099 | 1.687622 | 0.081785 | 0.956457 |
| <i>DNAH10</i>   | -0.329679 | 0.719154 | 0.346137 | 0.362205 | 1.427872 | 0.072597 | 0.956457 |

|                 |           |          |          |          |          |          |          |
|-----------------|-----------|----------|----------|----------|----------|----------|----------|
| <i>FAM83D</i>   | -0.002722 | 0.997281 | 0.354266 | 0.991553 | 1.003042 | 0.094933 | 0.961216 |
| <i>CABYR</i>    | -0.003093 | 0.996911 | 0.358522 | 0.99035  | 1.003516 | 0.105731 | 0.961216 |
| <i>RNASEH2A</i> | -0.00812  | 0.991913 | 0.358632 | 0.974865 | 1.009259 | 0.078435 | 0.961216 |
| <i>NCAPH</i>    | -0.010131 | 0.98992  | 0.358545 | 0.968742 | 1.011562 | 0.109299 | 0.961216 |
| <i>CACNAID</i>  | -0.412129 | 0.662239 | 0.357127 | 0.27546  | 1.592101 | 0.076645 | 0.961216 |
| <i>SYNE1</i>    | 0.0130381 | 1.013123 | 0.355525 | 0.985486 | 1.041536 | 0.125095 | 0.961216 |
| <i>LAMA1</i>    | -0.006033 | 0.993985 | 0.357416 | 0.981295 | 1.006839 | 0.077769 | 0.961216 |
| <i>COL5A2</i>   | 0.0012574 | 1.001258 | 0.361757 | 0.998556 | 1.003968 | 0.073466 | 0.966783 |
| <i>CRTAC1</i>   | 0.0584733 | 1.060217 | 0.364532 | 0.934339 | 1.203054 | 0.106567 | 0.97064  |
| <i>MMP9</i>     | -0.001419 | 0.998582 | 0.365306 | 0.995518 | 1.001655 | 0.067866 | 0.97064  |
| <i>PRDM9</i>    | 0.3668651 | 1.443203 | 0.368252 | 0.649021 | 3.209196 | 0.088702 | 0.973103 |
| <i>NRGN</i>     | 0.0205432 | 1.020756 | 0.36889  | 0.976025 | 1.067536 | 0.06659  | 0.973103 |
| <i>IRF6</i>     | -0.003192 | 0.996814 | 0.369399 | 0.989891 | 1.003785 | 0.092288 | 0.973103 |
| <i>KIF26B</i>   | 0.0389052 | 1.039672 | 0.372152 | 0.954529 | 1.132409 | 0.100549 | 0.977562 |
| <i>PRDM16</i>   | 0.0383043 | 1.039047 | 0.376403 | 0.954498 | 1.131087 | 0.096378 | 0.985919 |
| <i>EPHB2</i>    | 0.0366876 | 1.037369 | 0.378284 | 0.956068 | 1.125583 | 0.060897 | 0.98804  |
| <i>DLX5</i>     | -0.002119 | 0.997883 | 0.407324 | 0.992894 | 1.002897 | 0.069777 | 0.991977 |

|                 |           |          |          |          |          |          |          |
|-----------------|-----------|----------|----------|----------|----------|----------|----------|
| <i>TRIM59</i>   | -0.008737 | 0.991301 | 0.550429 | 0.963277 | 1.020141 | 0.080192 | 0.991977 |
| <i>LY6K</i>     | -0.00573  | 0.994286 | 0.613017 | 0.97245  | 1.016612 | 0.096355 | 0.991977 |
| <i>SHCBP1</i>   | -0.004729 | 0.995283 | 0.840138 | 0.950589 | 1.042078 | 0.092679 | 0.991977 |
| <i>KRTDAP</i>   | 0.0214712 | 1.021703 | 0.702597 | 0.915078 | 1.140753 | 0.038726 | 0.991977 |
| <i>GPIHBP1</i>  | 0.0248715 | 1.025183 | 0.672586 | 0.913494 | 1.150529 | 0.088693 | 0.991977 |
| <i>LCE1F</i>    | -0.659583 | 0.517067 | 0.453011 | 0.092335 | 2.895522 | 0.097441 | 0.991977 |
| <i>AFF3</i>     | 0.0025729 | 1.002576 | 0.881156 | 0.969323 | 1.03697  | 0.077279 | 0.991977 |
| <i>CNTNAP5</i>  | -0.226451 | 0.797359 | 0.400222 | 0.470455 | 1.351418 | 0.085601 | 0.991977 |
| <i>SCGB1D2</i>  | -0.813718 | 0.443207 | 0.444626 | 0.055016 | 3.570439 | 0.08533  | 0.991977 |
| <i>PKP3</i>     | -0.000607 | 0.999393 | 0.632528 | 0.99691  | 1.001882 | 0.083572 | 0.991977 |
| <i>TBX20</i>    | -0.078623 | 0.924388 | 0.683387 | 0.633524 | 1.348795 | 0.079715 | 0.991977 |
| <i>ARNTL2</i>   | -0.005014 | 0.994999 | 0.427058 | 0.982765 | 1.007386 | 0.111249 | 0.991977 |
| <i>GNG4</i>     | -0.00223  | 0.997773 | 0.672511 | 0.98751  | 1.008142 | 0.08191  | 0.991977 |
| <i>TAL1</i>     | -0.03983  | 0.960953 | 0.439683 | 0.868615 | 1.063107 | 0.086384 | 0.991977 |
| <i>CABLES1</i>  | 0.0045139 | 1.004524 | 0.784165 | 0.972596 | 1.037501 | 0.070658 | 0.991977 |
| <i>TFAP2A</i>   | 0.0007182 | 1.000718 | 0.881678 | 0.991299 | 1.010227 | 0.096006 | 0.991977 |
| <i>SERPINB5</i> | 0.0005172 | 1.000517 | 0.61714  | 0.998491 | 1.002548 | 0.082446 | 0.991977 |

|                |           |          |          |          |          |          |          |
|----------------|-----------|----------|----------|----------|----------|----------|----------|
| <i>HK3</i>     | 0.00525   | 1.005264 | 0.673967 | 0.980975 | 1.030154 | 0.06612  | 0.991977 |
| <i>ZMYND10</i> | 0.0263648 | 1.026715 | 0.405621 | 0.964861 | 1.092535 | 0.090297 | 0.991977 |
| <i>ITGB4</i>   | -0.000121 | 0.999879 | 0.69383  | 0.999277 | 1.000481 | 0.09569  | 0.991977 |
| <i>A2ML1</i>   | 0.0004075 | 1.000408 | 0.782096 | 0.997523 | 1.003301 | 0.084568 | 0.991977 |
| <i>CFTR</i>    | 0.0113567 | 1.011421 | 0.519304 | 0.977083 | 1.046967 | 0.07036  | 0.991977 |
| <i>ZNF716</i>  | -0.967359 | 0.380086 | 0.391352 | 0.041616 | 3.471413 | 0.085496 | 0.991977 |
| <i>TENC1</i>   | 0.0025961 | 1.0026   | 0.683721 | 0.990155 | 1.015201 | 0.106337 | 0.991977 |
| <i>CD93</i>    | 0.0012251 | 1.001226 | 0.626753 | 0.996294 | 1.006182 | 0.101034 | 0.991977 |
| <i>FEZF2</i>   | 0.020747  | 1.020964 | 0.52235  | 0.958087 | 1.087967 | 0.087582 | 0.991977 |
| <i>PRLR</i>    | -0.004656 | 0.995355 | 0.568959 | 0.979535 | 1.01143  | 0.054394 | 0.991977 |
| <i>SLC16A1</i> | -0.000699 | 0.999301 | 0.844324 | 0.992354 | 1.006297 | 0.07605  | 0.991977 |
| <i>DPEP2</i>   | 0.0292066 | 1.029637 | 0.663014 | 0.902885 | 1.174184 | 0.097625 | 0.991977 |
| <i>CTHRC1</i>  | 0.0006692 | 1.000669 | 0.834036 | 0.994425 | 1.006953 | 0.092717 | 0.991977 |
| <i>SOX17</i>   | 0.1187077 | 1.126041 | 0.444112 | 0.830838 | 1.52613  | 0.097276 | 0.991977 |
| <i>LAMC2</i>   | -0.000121 | 0.999879 | 0.731222 | 0.99919  | 1.000569 | 0.082329 | 0.991977 |
| <i>CRH</i>     | 0.0392507 | 1.040031 | 0.83083  | 0.725536 | 1.49085  | 0.095886 | 0.991977 |
| <i>CYP26C1</i> | 0.2495669 | 1.283469 | 0.76912  | 0.242473 | 6.793726 | 0.085267 | 0.991977 |

|                 |           |          |          |          |          |          |          |
|-----------------|-----------|----------|----------|----------|----------|----------|----------|
| <i>MSRI</i>     | 0.0057529 | 1.005769 | 0.483939 | 0.989698 | 1.022102 | 0.087288 | 0.991977 |
| <i>PDE2A</i>    | 0.0348462 | 1.03546  | 0.411093 | 0.952902 | 1.125172 | 0.105668 | 0.991977 |
| <i>MGC14436</i> | 0.6774753 | 1.968901 | 0.396187 | 0.411672 | 9.416645 | 0.103819 | 0.991977 |
| <i>PKMYT1</i>   | 0.0271196 | 1.027491 | 0.678213 | 0.903941 | 1.167927 | 0.102122 | 0.991977 |
| <i>TM4SF19</i>  | -0.002076 | 0.997926 | 0.880725 | 0.971224 | 1.025362 | 0.072644 | 0.991977 |
| <i>MNDA</i>     | 0.006989  | 1.007014 | 0.675205 | 0.974625 | 1.040478 | 0.041459 | 0.991977 |
| <i>C2CD4A</i>   | 0.0103277 | 1.010381 | 0.73385  | 0.951985 | 1.072359 | 0.086767 | 0.991977 |
| <i>EMP2</i>     | -0.01179  | 0.988279 | 0.778681 | 0.91027  | 1.072974 | 0.094183 | 0.991977 |
| <i>RAB6B</i>    | -0.000621 | 0.999379 | 0.765682 | 0.995304 | 1.00347  | 0.117485 | 0.991977 |
| <i>LGR4</i>     | -0.002209 | 0.997794 | 0.555623 | 0.990492 | 1.005149 | 0.060127 | 0.991977 |
| <i>LRFN2</i>    | -0.238336 | 0.787938 | 0.602799 | 0.321098 | 1.933508 | 0.065208 | 0.991977 |
| <i>IGSF9</i>    | -0.000974 | 0.999026 | 0.501988 | 0.99619  | 1.001871 | 0.087692 | 0.991977 |
| <i>WNT10A</i>   | -0.00345  | 0.996556 | 0.504418 | 0.986512 | 1.006702 | 0.082377 | 0.991977 |
| <i>COL6A6</i>   | -0.006097 | 0.993921 | 0.664458 | 0.966912 | 1.021685 | 0.064427 | 0.991977 |
| <i>FANCE</i>    | -0.005974 | 0.994043 | 0.640399 | 0.969435 | 1.019276 | 0.09749  | 0.991977 |
| <i>LCE3A</i>    | -0.529695 | 0.588785 | 0.510736 | 0.121454 | 2.854303 | 0.07114  | 0.991977 |
| <i>ALDH3B2</i>  | -0.003089 | 0.996916 | 0.753635 | 0.977868 | 1.016335 | 0.059526 | 0.991977 |



|                |           |          |          |          |          |          |          |
|----------------|-----------|----------|----------|----------|----------|----------|----------|
| <i>CPAMD8</i>  | -0.004089 | 0.995919 | 0.602899 | 0.980694 | 1.011381 | 0.081947 | 0.991977 |
| <i>NECAB1</i>  | 0.0231717 | 1.023442 | 0.460383 | 0.962377 | 1.088383 | 0.104426 | 0.991977 |
| <i>DAPL1</i>   | -0.000564 | 0.999436 | 0.759953 | 0.995824 | 1.003061 | 0.051686 | 0.991977 |
| <i>SPRRI1A</i> | 0.0019173 | 1.001919 | 0.680995 | 0.992802 | 1.01112  | 0.067563 | 0.991977 |
| <i>PERP</i>    | -0.000276 | 0.999725 | 0.429374 | 0.999042 | 1.000408 | 0.106643 | 0.991977 |
| <i>DSGI</i>    | 0.006099  | 1.006118 | 0.65929  | 0.979205 | 1.033769 | 0.072442 | 0.991977 |
| <i>ECSCR</i>   | 0.1668627 | 1.181592 | 0.410663 | 0.794017 | 1.75835  | 0.067656 | 0.991977 |
| <i>EDNRB</i>   | 0.0018659 | 1.001868 | 0.861345 | 0.981109 | 1.023066 | 0.102188 | 0.991977 |
| <i>PTPRZ1</i>  | -0.000777 | 0.999223 | 0.787758 | 0.993585 | 1.004893 | 0.096628 | 0.991977 |
| <i>MARCO</i>   | -0.00277  | 0.997234 | 0.436725 | 0.990297 | 1.004219 | 0.084632 | 0.991977 |
| <i>PGR</i>     | 0.0207496 | 1.020966 | 0.782142 | 0.881335 | 1.18272  | 0.06831  | 0.991977 |
| <i>GPR133</i>  | 0.0171405 | 1.017288 | 0.566434 | 0.95939  | 1.07868  | 0.086474 | 0.991977 |
| <i>SMAD6</i>   | -0.025077 | 0.975234 | 0.486554 | 0.908721 | 1.046616 | 0.093193 | 0.991977 |
| <i>CA3</i>     | -0.016259 | 0.983872 | 0.807675 | 0.863144 | 1.121486 | 0.082083 | 0.991977 |
| <i>CXCR1</i>   | 0.0423365 | 1.043245 | 0.88478  | 0.588445 | 1.849554 | 0.085467 | 0.991977 |
| <i>ACOX2</i>   | 0.0213016 | 1.02153  | 0.785087 | 0.876516 | 1.190536 | 0.069267 | 0.991977 |
| <i>ADCY4</i>   | 0.0055974 | 1.005613 | 0.878726 | 0.935848 | 1.080579 | 0.079895 | 0.991977 |

|                 |           |          |          |          |                                |          |          |
|-----------------|-----------|----------|----------|----------|--------------------------------|----------|----------|
| <i>F2RL3</i>    | 0.0494665 | 1.05071  | 0.434313 | 0.92817  | 1.189429                       | 0.097758 | 0.991977 |
| <i>PAX9</i>     | -0.001533 | 0.998468 | 0.731396 | 0.989764 | 1.007248                       | 0.073531 | 0.991977 |
| <i>KRT6A</i>    | -0.000011 | 0.999989 | 0.701531 | 0.999932 | 1.000046                       | 0.097279 | 0.991977 |
| <i>PHYHD1</i>   | 0.0087947 | 1.008833 | 0.498075 | 0.983491 | 1.034829                       | 0.059054 | 0.991977 |
| <i>KLK8</i>     | -0.03873  | 0.96201  | 0.604842 | 0.830747 | 1.114014                       | 0.065635 | 0.991977 |
| <i>PPP2R2C</i>  | 0.0013601 | 1.001361 | 0.762642 | 0.992561 | 1.010239                       | 0.088803 | 0.991977 |
| <i>FERMT1</i>   | 0.0148385 | 1.014949 | 0.441263 | 0.977332 | 1.054014                       | 0.079518 | 0.991977 |
| <i>CLIC5</i>    | 0.0097006 | 1.009748 | 0.430668 | 0.985678 | 1.034406                       | 0.133323 | 0.991977 |
| <i>SELENBP1</i> | 0.024133  | 1.024427 | 0.413577 | 0.966844 | 1.085438                       | 0.082237 | 0.991977 |
| <i>KRT75</i>    | -0.001384 | 0.998617 | 0.553665 | 0.994053 | 1.003202                       | 0.085381 | 0.991977 |
| <i>CCRL2</i>    | 0.0213609 | 1.021591 | 0.470473 | 0.964014 | 1.082606                       | 0.095278 | 0.991977 |
| <i>GABRB1</i>   | 13.373286 | 642605.6 | 0.418185 | 0.000000 | 7390000000000<br>0000000       | 0.083411 | 0.991977 |
| <i>PLA2G2A</i>  | -0.031196 | 0.969286 | 0.690189 | 0.831446 | 1.129977                       | 0.059993 | 0.991977 |
| <i>RETN</i>     | 0.1628392 | 1.176847 | 0.598795 | 0.641612 | 2.158578                       | 0.085681 | 0.991977 |
| <i>MS4A6E</i>   | 11.551084 | 103889.5 | 0.695272 | 0.000000 | 1310000000000<br>0000000000000 | 0.089354 | 0.991977 |

00000x10<sup>30</sup>

|                 |           |          |          |          |          |          |          |
|-----------------|-----------|----------|----------|----------|----------|----------|----------|
| <i>IGF2BP3</i>  | -0.000928 | 0.999073 | 0.760607 | 0.993127 | 1.005054 | 0.092969 | 0.991977 |
| <i>OVOL1</i>    | -0.004377 | 0.995633 | 0.609223 | 0.979064 | 1.012482 | 0.103546 | 0.991977 |
| <i>ADAMTS8</i>  | 0.0150594 | 1.015173 | 0.680163 | 0.945029 | 1.090524 | 0.128839 | 0.991977 |
| <i>ITGA11</i>   | -0.0019   | 0.998101 | 0.821227 | 0.981784 | 1.01469  | 0.069697 | 0.991977 |
| <i>HOXB9</i>    | -0.001043 | 0.998957 | 0.703981 | 0.993597 | 1.004347 | 0.136049 | 0.991977 |
| <i>CCL14</i>    | -0.014748 | 0.985361 | 0.489519 | 0.944997 | 1.027448 | 0.079901 | 0.991977 |
| <i>SIRPB1</i>   | -0.006247 | 0.993772 | 0.838244 | 0.935919 | 1.055202 | 0.078104 | 0.991977 |
| <i>FHL5</i>     | 0.097908  | 1.102861 | 0.52445  | 0.815807 | 1.490921 | 0.094689 | 0.991977 |
| <i>EPHA1</i>    | -0.001053 | 0.998948 | 0.845387 | 0.988436 | 1.009572 | 0.058086 | 0.991977 |
| <i>AGXT</i>     | -0.159828 | 0.85229  | 0.717117 | 0.359001 | 2.023387 | 0.089394 | 0.991977 |
| <i>COL29A1</i>  | -0.019415 | 0.980773 | 0.795682 | 0.846736 | 1.136028 | 0.079978 | 0.991977 |
| <i>TMEM79</i>   | -0.005398 | 0.994616 | 0.390257 | 0.982443 | 1.00694  | 0.041781 | 0.991977 |
| <i>B4GALNT1</i> | -0.007871 | 0.99216  | 0.881581 | 0.894555 | 1.100415 | 0.094376 | 0.991977 |
| <i>DLK1</i>     | -0.000213 | 0.999787 | 0.883156 | 0.996957 | 1.002626 | 0.090923 | 0.991977 |
| <i>NEFL</i>     | -0.001639 | 0.998362 | 0.812417 | 0.984934 | 1.011972 | 0.089534 | 0.991977 |
| <i>LMO3</i>     | 0.0023065 | 1.002309 | 0.423064 | 0.996669 | 1.007981 | 0.095902 | 0.991977 |

|                 |           |          |          |          |              |          |          |
|-----------------|-----------|----------|----------|----------|--------------|----------|----------|
| <i>EFNA3</i>    | -0.008188 | 0.991845 | 0.400035 | 0.97311  | 1.010941     | 0.092669 | 0.991977 |
| <i>LASS3</i>    | -0.00805  | 0.991982 | 0.512828 | 0.968351 | 1.016189     | 0.086577 | 0.991977 |
| <i>EXOC3L</i>   | 0.0641239 | 1.066224 | 0.797729 | 0.652944 | 1.741091     | 0.084468 | 0.991977 |
| <i>PIWIL1</i>   | 0.1208126 | 1.128413 | 0.730005 | 0.568193 | 2.240995     | 0.08027  | 0.991977 |
| <i>GIMAP8</i>   | -0.005703 | 0.994313 | 0.7884   | 0.953754 | 1.036598     | 0.072978 | 0.991977 |
| <i>SLCO1B1</i>  | -0.85449  | 0.4255   | 0.76518  | 0.001562 | 115.8904     | 0.077849 | 0.991977 |
| <i>CYP24A1</i>  | 0.0008821 | 1.000883 | 0.651804 | 0.997055 | 1.004725     | 0.067037 | 0.991977 |
| <i>MCM6</i>     | 0.0129462 | 1.01303  | 0.554176 | 0.970493 | 1.057432     | 0.052387 | 0.991977 |
| <i>CCDC85A</i>  | -0.013252 | 0.986835 | 0.805941 | 0.887826 | 1.096887     | 0.081107 | 0.991977 |
| <i>C20orf85</i> | 0.0197158 | 1.019911 | 0.660365 | 0.93405  | 1.113666     | 0.064583 | 0.991977 |
| <i>TH</i>       | -0.022399 | 0.97785  | 0.503525 | 0.915736 | 1.044176     | 0.096308 | 0.991977 |
| <i>SPAG5</i>    | 0.0067371 | 1.00676  | 0.595623 | 0.98202  | 1.032123     | 0.09767  | 0.991977 |
| <i>DLK2</i>     | -0.006295 | 0.993725 | 0.733106 | 0.958414 | 1.030337     | 0.066167 | 0.991977 |
| <i>KANK2</i>    | 0.0023762 | 1.002379 | 0.869091 | 0.97445  | 1.031108     | 0.068581 | 0.991977 |
| <i>KCNQ2</i>    | 0.1018916 | 1.107263 | 0.751294 | 0.589653 | 2.079244     | 0.089646 | 0.991977 |
| <i>GGH</i>      | 0.0038863 | 1.003894 | 0.431992 | 0.99421  | 1.013672     | 0.092947 | 0.991977 |
| <i>APOBEC1</i>  | 5.4110823 | 223.8738 | 0.767313 | 0.000000 | 825000000000 | 0.093664 | 0.991977 |

00000x10<sup>17</sup>

|                |           |          |          |          |               |          |          |
|----------------|-----------|----------|----------|----------|---------------|----------|----------|
| <i>HYAL1</i>   | -0.00588  | 0.994137 | 0.729517 | 0.961548 | 1.027831      | 0.094156 | 0.991977 |
| <i>BUB1B</i>   | -0.003363 | 0.996642 | 0.800057 | 0.971037 | 1.022923      | 0.098451 | 0.991977 |
| <i>COX8C</i>   | 0.3136794 | 1.368451 | 0.436553 | 0.620937 | 3.015857      | 0.084635 | 0.991977 |
| <i>ACVRL1</i>  | 0.0087003 | 1.008738 | 0.439952 | 0.986709 | 1.031259      | 0.093768 | 0.991977 |
| <i>MDGA2</i>   | 0.2616184 | 1.299031 | 0.512732 | 0.593501 | 2.843265      | 0.093523 | 0.991977 |
| <i>A2M</i>     | -0.000306 | 0.999694 | 0.493179 | 0.998818 | 1.00057       | 0.085171 | 0.991977 |
| <i>C11orf9</i> | 0.2103088 | 1.234059 | 0.558208 | 0.610367 | 2.495059      | 0.100073 | 0.991977 |
| <i>FGFR4</i>   | 0.0187029 | 1.018879 | 0.503287 | 0.964578 | 1.076236      | 0.089182 | 0.991977 |
| <i>HBB</i>     | -0.006464 | 0.993556 | 0.514137 | 0.974447 | 1.01304       | 0.085188 | 0.991977 |
| <i>TP63</i>    | -0.000119 | 0.999881 | 0.711341 | 0.999251 | 1.000511      | 0.091842 | 0.991977 |
| <i>GRASP</i>   | 0.0042798 | 1.004289 | 0.823689 | 0.967182 | 1.042819      | 0.078629 | 0.991977 |
| <i>DNTT</i>    | 7.5657341 | 1930.886 | 0.490241 | 0.000001 | 4170000000000 | 0.099358 | 0.991977 |
| <i>ATCAY</i>   | -0.147338 | 0.863002 | 0.75482  | 0.342307 | 2.175745      | 0.096799 | 0.991977 |
| <i>CLDN18</i>  | -0.001915 | 0.998087 | 0.668631 | 0.989374 | 1.006877      | 0.071117 | 0.991977 |
| <i>GPX2</i>    | -0.000105 | 0.999895 | 0.587292 | 0.999514 | 1.000275      | 0.098733 | 0.991977 |
| <i>EDN2</i>    | 0.0150859 | 1.0152   | 0.454563 | 0.975844 | 1.056144      | 0.103801 | 0.991977 |

|                |           |          |          |          |          |          |          |
|----------------|-----------|----------|----------|----------|----------|----------|----------|
| <i>CDKL2</i>   | -0.017103 | 0.983042 | 0.792237 | 0.865573 | 1.116454 | 0.09408  | 0.991977 |
| <i>PRR15L</i>  | 0.0095229 | 1.009568 | 0.690412 | 0.963351 | 1.058003 | 0.091435 | 0.991977 |
| <i>ALDH1L1</i> | 0.0018143 | 1.001816 | 0.833964 | 0.984965 | 1.018955 | 0.084239 | 0.991977 |
| <i>GPD1L</i>   | -0.010509 | 0.989546 | 0.764339 | 0.923843 | 1.059923 | 0.060343 | 0.991977 |
| <i>COL1A1</i>  | -0.000055 | 0.999945 | 0.444277 | 0.999805 | 1.000086 | 0.058306 | 0.991977 |
| <i>MUC13</i>   | -0.008676 | 0.991362 | 0.82722  | 0.917059 | 1.071684 | 0.061952 | 0.991977 |
| <i>NEK2</i>    | -0.010492 | 0.989563 | 0.666463 | 0.94346  | 1.037919 | 0.091417 | 0.991977 |
| <i>GINS2</i>   | -0.004384 | 0.995626 | 0.689569 | 0.974438 | 1.017274 | 0.096508 | 0.991977 |
| <i>SYT16</i>   | 1.2586513 | 3.52067  | 0.463646 | 0.121541 | 101.9832 | 0.107422 | 0.991977 |
| <i>PTTG1</i>   | 0.0055646 | 1.00558  | 0.57023  | 0.986446 | 1.025085 | 0.083355 | 0.991977 |
| <i>POU2F3</i>  | -0.003316 | 0.996689 | 0.661791 | 0.981989 | 1.01161  | 0.096276 | 0.991977 |
| <i>CEL</i>     | -0.001368 | 0.998633 | 0.410569 | 0.995385 | 1.001892 | 0.101027 | 0.991977 |
| <i>C1orf74</i> | -0.009514 | 0.990532 | 0.575191 | 0.958117 | 1.024043 | 0.136587 | 0.991977 |
| <i>DARC</i>    | 0.0032006 | 1.003206 | 0.737207 | 0.984625 | 1.022137 | 0.048075 | 0.991977 |
| <i>CAPN9</i>   | 0.0505652 | 1.051865 | 0.483107 | 0.913247 | 1.211525 | 0.095704 | 0.991977 |
| <i>GREM1</i>   | -0.003799 | 0.996208 | 0.439182 | 0.986666 | 1.005843 | 0.106912 | 0.991977 |
| <i>MS4A7</i>   | 0.0031145 | 1.003119 | 0.713187 | 0.986599 | 1.019917 | 0.098595 | 0.991977 |

|                 |           |          |          |          |          |          |          |
|-----------------|-----------|----------|----------|----------|----------|----------|----------|
| <i>CCDC17</i>   | -0.102807 | 0.902302 | 0.592358 | 0.619316 | 1.314592 | 0.094418 | 0.991977 |
| <i>RSPHI</i>    | 0.0102515 | 1.010304 | 0.843169 | 0.912737 | 1.118301 | 0.073094 | 0.991977 |
| <i>SORD</i>     | 0.0050273 | 1.00504  | 0.48509  | 0.990955 | 1.019325 | 0.070173 | 0.991977 |
| <i>NRSNI</i>    | -0.31472  | 0.729993 | 0.697822 | 0.149055 | 3.575131 | 0.079718 | 0.991977 |
| <i>PITXI</i>    | 0.0011997 | 1.0012   | 0.837845 | 0.989763 | 1.01277  | 0.092601 | 0.991977 |
| <i>PPP1R16B</i> | 0.0053135 | 1.005328 | 0.561131 | 0.987473 | 1.023505 | 0.056811 | 0.991977 |
| <i>FGD5</i>     | 0.0072354 | 1.007262 | 0.547832 | 0.983773 | 1.031311 | 0.088143 | 0.991977 |
| <i>GAPDH</i>    | -0.000048 | 0.999952 | 0.570959 | 0.999787 | 1.000118 | 0.098985 | 0.991977 |
| <i>ICAM2</i>    | 0.0022499 | 1.002252 | 0.877155 | 0.974065 | 1.031256 | 0.10136  | 0.991977 |
| <i>KCNA3</i>    | 0.0230462 | 1.023314 | 0.80086  | 0.855532 | 1.224    | 0.08952  | 0.991977 |
| <i>DNASE1L3</i> | -0.030539 | 0.969923 | 0.589293 | 0.868133 | 1.083648 | 0.092623 | 0.991977 |
| <i>KCTD1</i>    | -0.001361 | 0.99864  | 0.453543 | 0.995092 | 1.0022   | 0.10216  | 0.991977 |
| <i>PBK</i>      | 0.0175361 | 1.017691 | 0.461891 | 0.971242 | 1.06636  | 0.078228 | 0.991977 |
| <i>AQP1</i>     | -0.000346 | 0.999655 | 0.794156 | 0.997063 | 1.002253 | 0.09138  | 0.991977 |
| <i>CSRNP1</i>   | -0.003813 | 0.996195 | 0.868564 | 0.952212 | 1.042209 | 0.093168 | 0.991977 |
| <i>RASGRP2</i>  | 0.0067382 | 1.006761 | 0.864583 | 0.931741 | 1.087821 | 0.131826 | 0.991977 |
| <i>EPN3</i>     | 0.0013907 | 1.001392 | 0.860191 | 0.986014 | 1.01701  | 0.074697 | 0.991977 |

|                  |           |          |          |          |          |          |          |
|------------------|-----------|----------|----------|----------|----------|----------|----------|
| <i>MMRN2</i>     | -0.001003 | 0.998998 | 0.889572 | 0.984959 | 1.013237 | 0.084974 | 0.991977 |
| <i>CDK5R1</i>    | -0.055569 | 0.945947 | 0.57354  | 0.779523 | 1.147901 | 0.077904 | 0.991977 |
| <i>MFSD2A</i>    | -0.001314 | 0.998687 | 0.889401 | 0.980358 | 1.017358 | 0.079101 | 0.991977 |
| <i>UBXN10</i>    | -0.024801 | 0.975504 | 0.786636 | 0.815154 | 1.167398 | 0.126586 | 0.991977 |
| <i>SCGB3A1</i>   | 0.0016593 | 1.001661 | 0.730792 | 0.992237 | 1.011173 | 0.107167 | 0.991977 |
| <i>C10orf116</i> | -0.003214 | 0.996791 | 0.544462 | 0.986483 | 1.007206 | 0.118691 | 0.991977 |
| <i>SULT2A1</i>   | 1.2955337 | 3.652945 | 0.643228 | 0.0152   | 877.8877 | 0.06525  | 0.991977 |
| <i>SPN</i>       | 0.0377684 | 1.038491 | 0.721089 | 0.844018 | 1.277772 | 0.095825 | 0.991977 |
| <i>CENPM</i>     | -0.009016 | 0.991025 | 0.814673 | 0.919063 | 1.068621 | 0.083497 | 0.991977 |
| <i>GPER</i>      | -0.010365 | 0.989688 | 0.853012 | 0.886909 | 1.104379 | 0.077821 | 0.991977 |
| <i>POSTN</i>     | 0.0001992 | 1.000199 | 0.818347 | 0.998501 | 1.001901 | 0.109048 | 0.991977 |
| <i>OLR1</i>      | 0.0063635 | 1.006384 | 0.657876 | 0.978436 | 1.03513  | 0.051327 | 0.991977 |
| <i>GRTPI</i>     | -0.008386 | 0.991649 | 0.523741 | 0.966412 | 1.017545 | 0.096904 | 0.991977 |
| <i>ITGA8</i>     | 0.0239227 | 1.024211 | 0.777294 | 0.867753 | 1.208879 | 0.089632 | 0.991977 |
| <i>LOC731789</i> | -0.298947 | 0.741599 | 0.447291 | 0.343022 | 1.603306 | 0.059715 | 0.991977 |
| <i>HSPA12B</i>   | 0.0200696 | 1.020272 | 0.661031 | 0.932732 | 1.116029 | 0.092431 | 0.991977 |
| <i>ADAMTS12</i>  | 0.01769   | 1.017847 | 0.639242 | 0.945279 | 1.095987 | 0.093544 | 0.991977 |



|                |           |          |          |          |          |          |          |
|----------------|-----------|----------|----------|----------|----------|----------|----------|
| <i>RICH2</i>   | -0.03083  | 0.96964  | 0.677742 | 0.838413 | 1.121407 | 0.035024 | 0.991977 |
| <i>CDH7</i>    | -0.841134 | 0.431221 | 0.668801 | 0.009142 | 20.33959 | 0.093934 | 0.991977 |
| <i>KRT6C</i>   | 0.000611  | 1.000611 | 0.493583 | 0.998862 | 1.002363 | 0.064777 | 0.991977 |
| <i>FPR2</i>    | 0.0182091 | 1.018376 | 0.835846 | 0.857249 | 1.209789 | 0.081778 | 0.991977 |
| <i>BMP8A</i>   | 0.0125702 | 1.01265  | 0.724657 | 0.944241 | 1.086014 | 0.083935 | 0.991977 |
| <i>B3GNT3</i>  | 0.0101014 | 1.010153 | 0.737368 | 0.95224  | 1.071588 | 0.090901 | 0.991977 |
| <i>SCUBE1</i>  | 0.0024399 | 1.002443 | 0.885483 | 0.969704 | 1.036287 | 0.094366 | 0.991977 |
| <i>ESYT3</i>   | -0.076886 | 0.925995 | 0.56393  | 0.713161 | 1.202347 | 0.095943 | 0.991977 |
| <i>FAP</i>     | 0.0064177 | 1.006438 | 0.502122 | 0.987752 | 1.025479 | 0.078153 | 0.991977 |
| <i>GMFG</i>    | -0.006099 | 0.99392  | 0.659906 | 0.967284 | 1.021289 | 0.077808 | 0.991977 |
| <i>RGMA</i>    | -0.000337 | 0.999663 | 0.819468 | 0.996772 | 1.002562 | 0.089885 | 0.991977 |
| <i>DNAH9</i>   | 0.0379935 | 1.038725 | 0.773387 | 0.802025 | 1.345281 | 0.089575 | 0.991977 |
| <i>WFDC1</i>   | -0.037857 | 0.96285  | 0.754239 | 0.75967  | 1.220374 | 0.096559 | 0.991977 |
| <i>TNFSF13</i> | 0.0062309 | 1.00625  | 0.795902 | 0.959844 | 1.0549   | 0.092753 | 0.991977 |
| <i>VNN2</i>    | -0.014728 | 0.98538  | 0.470995 | 0.946701 | 1.025639 | 0.07334  | 0.991977 |
| <i>SESN3</i>   | -0.009793 | 0.990255 | 0.501884 | 0.962353 | 1.018967 | 0.077222 | 0.991977 |
| <i>HOXB13</i>  | -0.003145 | 0.99686  | 0.676641 | 0.982233 | 1.011704 | 0.086382 | 0.991977 |

|                 |           |          |          |          |          |          |          |
|-----------------|-----------|----------|----------|----------|----------|----------|----------|
| <i>CASS4</i>    | 0.0364237 | 1.037095 | 0.483191 | 0.936703 | 1.148247 | 0.05093  | 0.991977 |
| <i>PGC</i>      | -0.003105 | 0.9969   | 0.812263 | 0.971683 | 1.022771 | 0.092384 | 0.991977 |
| <i>RBPI</i>     | -0.000269 | 0.999732 | 0.779071 | 0.997858 | 1.001609 | 0.119592 | 0.991977 |
| <i>KRT19</i>    | -0.000040 | 0.99996  | 0.593474 | 0.999813 | 1.000107 | 0.089939 | 0.991977 |
| <i>CLEC14A</i>  | 0.0083572 | 1.008392 | 0.648234 | 0.972829 | 1.045255 | 0.085457 | 0.991977 |
| <i>PSCA</i>     | 0.0032536 | 1.003259 | 0.450782 | 0.994811 | 1.011779 | 0.103996 | 0.991977 |
| <i>EXO1</i>     | 0.0139238 | 1.014021 | 0.561881 | 0.967418 | 1.062869 | 0.068565 | 0.991977 |
| <i>PRX</i>      | 0.1030119 | 1.108505 | 0.403452 | 0.870535 | 1.411526 | 0.107217 | 0.991977 |
| <i>ESPNP</i>    | -0.173764 | 0.840495 | 0.888555 | 0.073969 | 9.550409 | 0.096644 | 0.991977 |
| <i>ESPN</i>     | 0.0195952 | 1.019788 | 0.592238 | 0.949223 | 1.0956   | 0.060427 | 0.991977 |
| <i>DUSP1</i>    | 0.0003568 | 1.000357 | 0.814136 | 0.997386 | 1.003337 | 0.060612 | 0.991977 |
| <i>KIAA1462</i> | -0.01262  | 0.98746  | 0.512351 | 0.950876 | 1.025451 | 0.097456 | 0.991977 |
| <i>PRR4</i>     | 0.001953  | 1.001955 | 0.783164 | 0.988115 | 1.015989 | 0.069668 | 0.991977 |
| <i>WISP1</i>    | -0.005323 | 0.994692 | 0.837226 | 0.945444 | 1.046504 | 0.07984  | 0.991977 |
| <i>FXYD1</i>    | -0.088405 | 0.91539  | 0.550838 | 0.684627 | 1.223936 | 0.086611 | 0.991977 |
| <i>EPRI</i>     | -0.002143 | 0.997859 | 0.814003 | 0.980204 | 1.015833 | 0.090035 | 0.991977 |
| <i>BRCAl</i>    | -0.002655 | 0.997349 | 0.886725 | 0.961572 | 1.034456 | 0.093657 | 0.991977 |

|                 |           |          |          |          |          |          |          |
|-----------------|-----------|----------|----------|----------|----------|----------|----------|
| <i>PPAP2C</i>   | 0.0005808 | 1.000581 | 0.878258 | 0.993173 | 1.008044 | 0.05657  | 0.991977 |
| <i>DKK2</i>     | -0.005617 | 0.994398 | 0.799953 | 0.952119 | 1.038555 | 0.07824  | 0.991977 |
| <i>TMEM20</i>   | 0.0211576 | 1.021383 | 0.387515 | 0.973526 | 1.071592 | 0.098271 | 0.991977 |
| <i>KIF11</i>    | -0.00968  | 0.990366 | 0.719253 | 0.939448 | 1.044045 | 0.097948 | 0.991977 |
| <i>NPPB</i>     | -4.015614 | 0.018032 | 0.482171 | 0.000000 | 1316.689 | 0.087836 | 0.991977 |
| <i>EMR1</i>     | 0.0490403 | 1.050263 | 0.471074 | 0.919137 | 1.200095 | 0.093844 | 0.991977 |
| <i>SGCA</i>     | 0.2027203 | 1.22473  | 0.546076 | 0.634141 | 2.365345 | 0.089366 | 0.991977 |
| <i>ALOX5AP</i>  | 0.087856  | 1.091831 | 0.452352 | 0.868247 | 1.37299  | 0.092273 | 0.991977 |
| <i>BNC1</i>     | -0.0005   | 0.9995   | 0.854892 | 0.994157 | 1.004872 | 0.078335 | 0.991977 |
| <i>SPC25</i>    | 0.0178922 | 1.018053 | 0.737939 | 0.916751 | 1.130549 | 0.075262 | 0.991977 |
| <i>RTP3</i>     | -0.264427 | 0.767645 | 0.407833 | 0.410421 | 1.435792 | 0.080554 | 0.991977 |
| <i>B4GALNT4</i> | -0.005097 | 0.994916 | 0.39519  | 0.983295 | 1.006674 | 0.097489 | 0.991977 |
| <i>MCM8</i>     | 0.0074782 | 1.007506 | 0.590144 | 0.98046  | 1.035298 | 0.086096 | 0.991977 |
| <i>CPLX2</i>    | 0.0003224 | 1.000323 | 0.88219  | 0.996066 | 1.004598 | 0.091998 | 0.991977 |
| <i>LYVE1</i>    | -0.022224 | 0.978021 | 0.720584 | 0.865883 | 1.104682 | 0.08431  | 0.991977 |
| <i>C19orf45</i> | -1.186365 | 0.305329 | 0.714649 | 0.000528 | 176.5025 | 0.08131  | 0.991977 |
| <i>AHNAK2</i>   | -0.003933 | 0.996075 | 0.751216 | 0.972148 | 1.02059  | 0.088523 | 0.991977 |

|                  |           |          |          |          |          |          |          |
|------------------|-----------|----------|----------|----------|----------|----------|----------|
| <i>C20orf114</i> | 0.0012328 | 1.001234 | 0.539456 | 0.997299 | 1.005184 | 0.107727 | 0.991977 |
| <i>C1orf94</i>   | 0.9686372 | 2.634352 | 0.489285 | 0.169137 | 41.03077 | 0.082499 | 0.991977 |
| <i>WFS1</i>      | -0.004767 | 0.995245 | 0.611562 | 0.977103 | 1.013723 | 0.097934 | 0.991977 |
| <i>LY86</i>      | 0.0239721 | 1.024262 | 0.66893  | 0.917683 | 1.143218 | 0.09645  | 0.991977 |
| <i>LIFR</i>      | -0.001068 | 0.998933 | 0.69441  | 0.993625 | 1.004269 | 0.086126 | 0.991977 |
| <i>PLD1</i>      | -0.001328 | 0.998673 | 0.890112 | 0.980034 | 1.017666 | 0.092499 | 0.991977 |
| <i>BTBD11</i>    | 0.0020635 | 1.002066 | 0.820013 | 0.984411 | 1.020037 | 0.085646 | 0.991977 |
| <i>SFTA1P</i>    | -0.013504 | 0.986587 | 0.87557  | 0.833157 | 1.168271 | 0.091593 | 0.991977 |
| <i>CXCL2</i>     | 0.0047058 | 1.004717 | 0.843408 | 0.958883 | 1.052741 | 0.097782 | 0.991977 |
| <i>ARHGAP29</i>  | -0.001119 | 0.998882 | 0.878133 | 0.984702 | 1.013266 | 0.064947 | 0.991977 |
| <i>LRRC46</i>    | 0.1067641 | 1.112672 | 0.602339 | 0.744648 | 1.662582 | 0.100399 | 0.991977 |
| <i>SPP1</i>      | -0.000035 | 0.999965 | 0.811183 | 0.999682 | 1.000249 | 0.093212 | 0.991977 |
| <i>FAM57B</i>    | -0.035253 | 0.965362 | 0.861548 | 0.649583 | 1.434647 | 0.080425 | 0.991977 |
| <i>DSP</i>       | -0.000487 | 0.999513 | 0.445736 | 0.998263 | 1.000765 | 0.078712 | 0.991977 |
| <i>SELP</i>      | 0.0626213 | 1.064624 | 0.561731 | 0.861662 | 1.315393 | 0.09676  | 0.991977 |
| <i>PLEK2</i>     | -0.001567 | 0.998434 | 0.686758 | 0.99086  | 1.006066 | 0.096835 | 0.991977 |
| <i>VSIG2</i>     | -0.013828 | 0.986268 | 0.519104 | 0.945668 | 1.02861  | 0.088147 | 0.991977 |

|                  |           |          |          |          |          |          |          |
|------------------|-----------|----------|----------|----------|----------|----------|----------|
| <i>C5orf4</i>    | -0.19946  | 0.819173 | 0.676486 | 0.320985 | 2.090581 | 0.089767 | 0.991977 |
| <i>ATP1A2</i>    | 0.2596222 | 1.29644  | 0.558167 | 0.543695 | 3.09136  | 0.079474 | 0.991977 |
| <i>BIK</i>       | -0.013638 | 0.986455 | 0.665326 | 0.927344 | 1.049334 | 0.081516 | 0.991977 |
| <i>CST1</i>      | -0.001263 | 0.998738 | 0.860017 | 0.984822 | 1.012851 | 0.093382 | 0.991977 |
| <i>CSF3</i>      | 0.0181797 | 1.018346 | 0.418159 | 0.9745   | 1.064165 | 0.082931 | 0.991977 |
| <i>GPX3</i>      | 0.0021612 | 1.002164 | 0.75041  | 0.988907 | 1.015598 | 0.088779 | 0.991977 |
| <i>LOC153328</i> | -0.061066 | 0.940761 | 0.81235  | 0.568226 | 1.557534 | 0.085233 | 0.991977 |
| <i>MTIM</i>      | -0.038859 | 0.961886 | 0.671527 | 0.803751 | 1.151133 | 0.11311  | 0.991977 |
| <i>FUT2</i>      | 0.009763  | 1.009811 | 0.618265 | 0.971769 | 1.049341 | 0.08814  | 0.991977 |
| <i>GJA4</i>      | 0.0490127 | 1.050234 | 0.385397 | 0.940203 | 1.173142 | 0.141179 | 0.991977 |
| <i>NINJ2</i>     | 0.0257295 | 1.026063 | 0.779584 | 0.856876 | 1.228657 | 0.088021 | 0.991977 |
| <i>ABCB6</i>     | 0.0014444 | 1.001445 | 0.591675 | 0.996174 | 1.006745 | 0.109935 | 0.991977 |
| <i>RND1</i>      | 0.0057094 | 1.005726 | 0.750396 | 0.970963 | 1.041733 | 0.086679 | 0.991977 |
| <i>PIGR</i>      | 0.0005185 | 1.000519 | 0.783095 | 0.996832 | 1.004219 | 0.075353 | 0.991977 |
| <i>S100A2</i>    | -0.000108 | 0.999892 | 0.657008 | 0.999414 | 1.00037  | 0.097884 | 0.991977 |
| <i>ALG3</i>      | -0.000367 | 0.999634 | 0.77463  | 0.997129 | 1.002145 | 0.069668 | 0.991977 |
| <i>NDUFA4L2</i>  | 0.0004609 | 1.000461 | 0.71566  | 0.997983 | 1.002945 | 0.081197 | 0.991977 |

|                |           |          |          |          |          |          |          |
|----------------|-----------|----------|----------|----------|----------|----------|----------|
| <i>LHX1</i>    | -0.189432 | 0.827429 | 0.673445 | 0.342856 | 1.996867 | 0.089587 | 0.991977 |
| <i>TMEM179</i> | 0.3549812 | 1.426154 | 0.533558 | 0.46648  | 4.360132 | 0.09192  | 0.991977 |
| <i>C4BPA</i>   | 0.0042125 | 1.004221 | 0.403556 | 0.994344 | 1.014197 | 0.079414 | 0.991977 |
| <i>SLC38A8</i> | 0.320847  | 1.378295 | 0.586851 | 0.433271 | 4.384544 | 0.08208  | 0.991977 |
| <i>EPHB3</i>   | -0.001833 | 0.998169 | 0.652274 | 0.990244 | 1.006157 | 0.072805 | 0.991977 |
| <i>FGFBP2</i>  | 0.0006142 | 1.000614 | 0.7264   | 0.997178 | 1.004063 | 0.077939 | 0.991977 |
| <i>SPRR2A</i>  | 0.0011591 | 1.00116  | 0.588492 | 0.996965 | 1.005373 | 0.092351 | 0.991977 |
| <i>SEMA3B</i>  | 0.0017917 | 1.001793 | 0.76088  | 0.9903   | 1.01342  | 0.099133 | 0.991977 |
| <i>PEBP4</i>   | -0.011737 | 0.988332 | 0.649492 | 0.939552 | 1.039645 | 0.075471 | 0.991977 |
| <i>EGFR</i>    | 0.0003662 | 1.000366 | 0.535024 | 0.99921  | 1.001524 | 0.090291 | 0.991977 |
| <i>MIF</i>     | 0.0006955 | 1.000696 | 0.697781 | 0.997189 | 1.004215 | 0.103866 | 0.991977 |
| <i>DMPI</i>    | -0.394971 | 0.673699 | 0.854182 | 0.009981 | 45.47489 | 0.108167 | 0.991977 |
| <i>FABP7</i>   | -0.001523 | 0.998478 | 0.657634 | 0.991773 | 1.005228 | 0.087386 | 0.991977 |
| <i>RTKN2</i>   | -0.009874 | 0.990174 | 0.602437 | 0.95406  | 1.027655 | 0.094996 | 0.991977 |
| <i>CIQTNF7</i> | -0.282111 | 0.75419  | 0.451588 | 0.36181  | 1.572102 | 0.077974 | 0.991977 |
| <i>LRRC36</i>  | -0.130088 | 0.878018 | 0.703389 | 0.449448 | 1.715252 | 0.101619 | 0.991977 |
| <i>ECT2</i>    | 0.0007774 | 1.000778 | 0.64924  | 0.997431 | 1.004136 | 0.044225 | 0.991977 |

|                 |           |          |          |          |          |          |          |
|-----------------|-----------|----------|----------|----------|----------|----------|----------|
| <i>KLF2</i>     | -0.011305 | 0.988758 | 0.650904 | 0.941507 | 1.03838  | 0.088783 | 0.991977 |
| <i>EZH2</i>     | 0.0999695 | 1.105137 | 0.508204 | 0.821873 | 1.486031 | 0.059043 | 0.991977 |
| <i>H19</i>      | 0.000039  | 1.000039 | 0.536548 | 0.999916 | 1.000162 | 0.092278 | 0.991977 |
| <i>LIMCH1</i>   | -0.007415 | 0.992613 | 0.523001 | 0.970284 | 1.015456 | 0.088362 | 0.991977 |
| <i>ABLIM3</i>   | -0.002663 | 0.997341 | 0.860753 | 0.968105 | 1.027459 | 0.091671 | 0.991977 |
| <i>SPRR2D</i>   | -0.001112 | 0.998888 | 0.689951 | 0.993445 | 1.004362 | 0.083988 | 0.991977 |
| <i>CADM1</i>    | 0.0036619 | 1.003669 | 0.688785 | 0.985843 | 1.021817 | 0.071326 | 0.991977 |
| <i>NR5A2</i>    | 0.0346668 | 1.035275 | 0.776432 | 0.814971 | 1.315131 | 0.08096  | 0.991977 |
| <i>GLIPR2</i>   | -0.006449 | 0.993572 | 0.599365 | 0.96995  | 1.017769 | 0.0831   | 0.991977 |
| <i>C6orf97</i>  | 0.0185667 | 1.01874  | 0.867962 | 0.818465 | 1.268022 | 0.088013 | 0.991977 |
| <i>TBR1</i>     | -0.36885  | 0.691529 | 0.706458 | 0.101429 | 4.714742 | 0.123598 | 0.991977 |
| <i>COLEC12</i>  | 0.0121085 | 1.012182 | 0.684582 | 0.954742 | 1.073078 | 0.088637 | 0.991977 |
| <i>PRB2</i>     | -0.77416  | 0.461091 | 0.46585  | 0.057566 | 3.693266 | 0.094067 | 0.991977 |
| <i>LOC84740</i> | -0.000526 | 0.999475 | 0.787026 | 0.995671 | 1.003293 | 0.085964 | 0.991977 |
| <i>RNASE4</i>   | 0.1254018 | 1.133604 | 0.614775 | 0.695607 | 1.84739  | 0.084412 | 0.991977 |
| <i>C7orf58</i>  | -0.012618 | 0.987461 | 0.807631 | 0.892086 | 1.093032 | 0.08893  | 0.991977 |
| <i>EMCN</i>     | -0.095516 | 0.908903 | 0.884819 | 0.249615 | 3.309514 | 0.09433  | 0.991977 |

|                       |           |          |          |          |          |          |          |
|-----------------------|-----------|----------|----------|----------|----------|----------|----------|
| <i>PECAMI</i>         | -0.003042 | 0.996963 | 0.81954  | 0.971248 | 1.023359 | 0.082897 | 0.991977 |
| <i>LRRN4</i>          | -0.165779 | 0.847233 | 0.509174 | 0.517891 | 1.386015 | 0.085053 | 0.991977 |
| <i>LRRC55</i>         | -0.005964 | 0.994053 | 0.754388 | 0.957595 | 1.031899 | 0.098608 | 0.991977 |
| <i>BMP7</i>           | 0.0024579 | 1.002461 | 0.433108 | 0.996319 | 1.00864  | 0.084865 | 0.991977 |
| <i>FMO5</i>           | 0.1980294 | 1.218998 | 0.518151 | 0.668575 | 2.222575 | 0.069858 | 0.991977 |
| <i>EIF4EBP1</i>       | 0.0090728 | 1.009114 | 0.580248 | 0.977182 | 1.04209  | 0.091909 | 0.991977 |
| <i>SPRR3</i>          | 0.0004851 | 1.000485 | 0.566342 | 0.998828 | 1.002145 | 0.086461 | 0.991977 |
| <i>TNFRSF10<br/>C</i> | 0.1326822 | 1.141887 | 0.419033 | 0.827683 | 1.575369 | 0.105546 | 0.991977 |
| <i>FGF11</i>          | -0.001525 | 0.998476 | 0.618336 | 0.992504 | 1.004484 | 0.110819 | 0.991977 |
| <i>GNG7</i>           | -0.033334 | 0.967216 | 0.758945 | 0.781737 | 1.196702 | 0.165492 | 0.991977 |
| <i>KIF1A</i>          | 0.0008166 | 1.000817 | 0.83396  | 0.993204 | 1.008488 | 0.061949 | 0.991977 |
| <i>TGFBR2</i>         | -0.001139 | 0.998862 | 0.818174 | 0.989214 | 1.008605 | 0.094712 | 0.991977 |
| <i>RBP4</i>           | 0.0136447 | 1.013738 | 0.625929 | 0.959621 | 1.070907 | 0.090929 | 0.991977 |
| <i>RHOJ</i>           | 0.0617958 | 1.063745 | 0.85434  | 0.549941 | 2.057592 | 0.091697 | 0.991977 |
| <i>FCN3</i>           | -0.015962 | 0.984165 | 0.77702  | 0.881238 | 1.099114 | 0.088286 | 0.991977 |
| <i>BPIL2</i>          | -0.263001 | 0.768741 | 0.682423 | 0.218093 | 2.709687 | 0.079297 | 0.991977 |



|                 |           |          |          |          |          |          |          |
|-----------------|-----------|----------|----------|----------|----------|----------|----------|
| <i>FAM107A</i>  | 0.0403184 | 1.041142 | 0.771805 | 0.79282  | 1.367242 | 0.094079 | 0.991977 |
| <i>FOSB</i>     | 0.0080013 | 1.008033 | 0.527287 | 0.983334 | 1.033353 | 0.07971  | 0.991977 |
| <i>PTPRN2</i>   | -0.039579 | 0.961194 | 0.474708 | 0.862346 | 1.071372 | 0.038308 | 0.991977 |
| <i>SLC6A20</i>  | 3.4914957 | 32.83502 | 0.489544 | 0.001643 | 656278.7 | 0.078923 | 0.991977 |
| <i>SIX1</i>     | -0.007722 | 0.992308 | 0.411183 | 0.9742   | 1.010752 | 0.09918  | 0.991977 |
| <i>FHOD3</i>    | -0.138147 | 0.870971 | 0.463478 | 0.602017 | 1.260081 | 0.069235 | 0.991977 |
| <i>GIMAP7</i>   | 0.0137614 | 1.013857 | 0.694256 | 0.946623 | 1.085865 | 0.08606  | 0.991977 |
| <i>PLA1A</i>    | -0.0234   | 0.976872 | 0.724036 | 0.857874 | 1.112376 | 0.086393 | 0.991977 |
| <i>STEAP4</i>   | 0.0023104 | 1.002313 | 0.439156 | 0.996463 | 1.008197 | 0.087098 | 0.991977 |
| <i>HOPX</i>     | -0.009682 | 0.990364 | 0.601029 | 0.955068 | 1.026965 | 0.072673 | 0.991977 |
| <i>KIAA0101</i> | -0.024185 | 0.976105 | 0.448681 | 0.916903 | 1.039129 | 0.10136  | 0.991977 |
| <i>SVEP1</i>    | 0.008411  | 1.008446 | 0.730678 | 0.961289 | 1.057917 | 0.115285 | 0.991977 |
| <i>RHCG</i>     | 0.0017372 | 1.001739 | 0.639955 | 0.994473 | 1.009057 | 0.092432 | 0.991977 |
| <i>NOTCH4</i>   | -0.011389 | 0.988676 | 0.850106 | 0.878535 | 1.112626 | 0.085388 | 0.991977 |
| <i>VSIG10L</i>  | 0.0109464 | 1.011006 | 0.625414 | 0.967538 | 1.056428 | 0.090173 | 0.991977 |
| <i>LST1</i>     | -0.020747 | 0.979467 | 0.855454 | 0.783514 | 1.224427 | 0.086426 | 0.991977 |
| <i>ZNF703</i>   | -0.00218  | 0.997823 | 0.737174 | 0.985202 | 1.010606 | 0.089794 | 0.991977 |

|                  |           |          |          |          |          |          |          |
|------------------|-----------|----------|----------|----------|----------|----------|----------|
| <i>SERPINB7</i>  | -0.013843 | 0.986252 | 0.587086 | 0.938189 | 1.036778 | 0.093228 | 0.991977 |
| <i>JAM2</i>      | 0.0641643 | 1.066268 | 0.603516 | 0.836957 | 1.358406 | 0.11935  | 0.991977 |
| <i>CD300C</i>    | -0.026444 | 0.973902 | 0.889939 | 0.669659 | 1.416371 | 0.096036 | 0.991977 |
| <i>ST3GAL5</i>   | 0.0059219 | 1.00594  | 0.624827 | 0.982345 | 1.030101 | 0.100902 | 0.991977 |
| <i>FAM19A4</i>   | 0.2180875 | 1.243696 | 0.678455 | 0.443543 | 3.487325 | 0.085963 | 0.991977 |
| <i>ATP13A4</i>   | -0.001831 | 0.99817  | 0.796654 | 0.984364 | 1.012171 | 0.081989 | 0.991977 |
| <i>FAM83B</i>    | -0.008586 | 0.991451 | 0.553005 | 0.963722 | 1.019977 | 0.071872 | 0.991977 |
| <i>HEPHL1</i>    | -0.00932  | 0.990723 | 0.48652  | 0.965053 | 1.017076 | 0.063727 | 0.991977 |
| <i>LDB2</i>      | -0.025878 | 0.974454 | 0.391675 | 0.918429 | 1.033896 | 0.064842 | 0.991977 |
| <i>KLF15</i>     | -0.020009 | 0.98019  | 0.823027 | 0.822544 | 1.16805  | 0.101852 | 0.991977 |
| <i>TRPV2</i>     | 0.0096062 | 1.009652 | 0.527262 | 0.980027 | 1.040174 | 0.098001 | 0.991977 |
| <i>ABI3BP</i>    | -0.006956 | 0.993068 | 0.598841 | 0.967662 | 1.019141 | 0.084608 | 0.991977 |
| <i>SERPINB11</i> | 0.0238857 | 1.024173 | 0.626437 | 0.930258 | 1.12757  | 0.090786 | 0.991977 |
| <i>LYPD3</i>     | -0.001038 | 0.998963 | 0.509372 | 0.995888 | 1.002047 | 0.107084 | 0.991977 |
| <i>C13orf30</i>  | 0.0141966 | 1.014298 | 0.798853 | 0.90938  | 1.13132  | 0.088666 | 0.991977 |
| <i>SFTPC</i>     | 0.0002587 | 1.000259 | 0.39349  | 0.999665 | 1.000853 | 0.104255 | 0.991977 |
| <i>RHOBTB2</i>   | 0.0035269 | 1.003533 | 0.855344 | 0.966194 | 1.042316 | 0.102264 | 0.991977 |

|                |           |          |          |          |          |          |          |
|----------------|-----------|----------|----------|----------|----------|----------|----------|
| <i>EROIL</i>   | 0.0046891 | 1.0047   | 0.417192 | 0.993383 | 1.016146 | 0.083378 | 0.991977 |
| <i>SPOCK2</i>  | 0.0001467 | 1.000147 | 0.890231 | 0.998065 | 1.002232 | 0.085609 | 0.991977 |
| <i>NTN4</i>    | 0.0038121 | 1.003819 | 0.651405 | 0.987356 | 1.020557 | 0.115489 | 0.991977 |
| <i>MYCL1</i>   | -0.001417 | 0.998584 | 0.68977  | 0.99166  | 1.005556 | 0.094984 | 0.991977 |
| <i>TPBG</i>    | -0.002989 | 0.997015 | 0.627037 | 0.985066 | 1.009109 | 0.078368 | 0.991977 |
| <i>PLK1</i>    | -0.013349 | 0.98674  | 0.595034 | 0.939349 | 1.036522 | 0.088608 | 0.991977 |
| <i>AQP9</i>    | -0.008423 | 0.991613 | 0.755525 | 0.940407 | 1.045607 | 0.068423 | 0.991977 |
| <i>NOS2</i>    | 0.0030381 | 1.003043 | 0.548569 | 0.993136 | 1.013048 | 0.119576 | 0.991977 |
| <i>KNDC1</i>   | -0.023197 | 0.97707  | 0.769831 | 0.836454 | 1.141324 | 0.041127 | 0.991977 |
| <i>ABCC5</i>   | -0.000712 | 0.999288 | 0.711336 | 0.995528 | 1.003063 | 0.097722 | 0.991977 |
| <i>CNTNAP2</i> | 0.0027289 | 1.002733 | 0.428548 | 0.995981 | 1.00953  | 0.129541 | 0.991977 |
| <i>HES2</i>    | -0.008723 | 0.991315 | 0.391499 | 0.971733 | 1.011292 | 0.08779  | 0.991977 |
| <i>FETUB</i>   | -0.002704 | 0.997299 | 0.866771 | 0.966284 | 1.02931  | 0.082164 | 0.991977 |
| <i>IGFL1</i>   | -0.004694 | 0.995317 | 0.677976 | 0.973505 | 1.017617 | 0.071193 | 0.991977 |
| <i>CLDN17</i>  | 0.2848945 | 1.329622 | 0.619808 | 0.431452 | 4.097548 | 0.082052 | 0.991977 |
| <i>SOD3</i>    | 0.0128044 | 1.012887 | 0.498649 | 0.976006 | 1.051161 | 0.088574 | 0.991977 |
| <i>PRG4</i>    | 0.0299696 | 1.030423 | 0.436123 | 0.95556  | 1.111151 | 0.121329 | 0.991977 |

|                 |            |          |          |          |          |          |          |
|-----------------|------------|----------|----------|----------|----------|----------|----------|
| <i>LRP2BP</i>   | -0.690492  | 0.501329 | 0.523488 | 0.060098 | 4.182053 | 0.096369 | 0.991977 |
| <i>FJX1</i>     | -0.010263  | 0.989789 | 0.594017 | 0.953132 | 1.027856 | 0.07511  | 0.991977 |
| <i>SLC6A15</i>  | 0.0024187  | 1.002422 | 0.632264 | 0.99254  | 1.012401 | 0.060251 | 0.991977 |
| <i>TGM3</i>     | 0.0063961  | 1.006417 | 0.744792 | 0.968395 | 1.045931 | 0.0879   | 0.991977 |
| <i>CFD</i>      | 0.0112466  | 1.01131  | 0.57948  | 0.971872 | 1.052349 | 0.091024 | 0.991977 |
| <i>ARHGEF15</i> | 0.0715326  | 1.074153 | 0.748151 | 0.69411  | 1.662281 | 0.090677 | 0.991977 |
| <i>NLRP10</i>   | -1.462451  | 0.231668 | 0.795585 | 0.000004 | 14790.48 | 0.086818 | 0.991977 |
| <i>MEX3A</i>    | -0.002376  | 0.997627 | 0.448754 | 0.991512 | 1.003779 | 0.074615 | 0.991977 |
| <i>CLCN2</i>    | -0.005435  | 0.99458  | 0.669775 | 0.970045 | 1.019735 | 0.072328 | 0.991977 |
| <i>PLCH2</i>    | 0.0027842  | 1.002788 | 0.569758 | 0.993207 | 1.012462 | 0.116323 | 0.991977 |
| <i>IGF2BP1</i>  | 0.0025403  | 1.002543 | 0.692092 | 0.990018 | 1.015227 | 0.097443 | 0.991977 |
| <i>SGMS2</i>    | 0.0119403  | 1.012012 | 0.702453 | 0.951876 | 1.075947 | 0.092992 | 0.991977 |
| <i>KRT14</i>    | -0.0000223 | 0.999978 | 0.728488 | 0.999852 | 1.000104 | 0.09675  | 0.991977 |
| <i>RAC3</i>     | 0.0021188  | 1.002121 | 0.85374  | 0.979799 | 1.024952 | 0.08254  | 0.991977 |
| <i>ATOH7</i>    | -1.212996  | 0.297305 | 0.541918 | 0.00603  | 14.6577  | 0.078996 | 0.991977 |
| <i>PCDP1</i>    | -0.18667   | 0.829718 | 0.440212 | 0.516495 | 1.332891 | 0.080796 | 0.991977 |
| <i>FRY</i>      | -0.013785  | 0.98631  | 0.630252 | 0.932476 | 1.043251 | 0.142496 | 0.991977 |

|                 |           |          |          |          |             |          |          |
|-----------------|-----------|----------|----------|----------|-------------|----------|----------|
| <i>RPL3L</i>    | -2.974948 | 0.05105  | 0.796967 | 0.000000 | 355415825.3 | 0.083839 | 0.991977 |
| <i>AOX1</i>     | -0.085246 | 0.918287 | 0.666243 | 0.623367 | 1.352736    | 0.084205 | 0.991977 |
| <i>LGR5</i>     | 0.0045023 | 1.004512 | 0.686312 | 0.982802 | 1.026702    | 0.101144 | 0.991977 |
| <i>MCM4</i>     | -0.00305  | 0.996955 | 0.447182 | 0.989146 | 1.004825    | 0.123903 | 0.991977 |
| <i>TEKT1</i>    | 0.1467944 | 1.158116 | 0.526625 | 0.735204 | 1.8243      | 0.099066 | 0.991977 |
| <i>CLDN10</i>   | 0.0032416 | 1.003247 | 0.629494 | 0.990121 | 1.016546    | 0.136779 | 0.991977 |
| <i>CNTN6</i>    | -0.26516  | 0.767083 | 0.536433 | 0.330943 | 1.778003    | 0.061646 | 0.991977 |
| <i>ITGB8</i>    | -0.004728 | 0.995283 | 0.437033 | 0.983487 | 1.007221    | 0.077162 | 0.991977 |
| <i>GIMAP1</i>   | 0.0814496 | 1.084859 | 0.487846 | 0.861859 | 1.365557    | 0.098987 | 0.991977 |
| <i>GNAI4</i>    | 0.0326288 | 1.033167 | 0.831349 | 0.765174 | 1.395021    | 0.065633 | 0.991977 |
| <i>FGFBP1</i>   | -0.00074  | 0.99926  | 0.501712 | 0.997104 | 1.001421    | 0.073578 | 0.991977 |
| <i>CDK1</i>     | 0.0044303 | 1.00444  | 0.590305 | 0.988371 | 1.020771    | 0.096997 | 0.991977 |
| <i>Clorf173</i> | 0.0863272 | 1.090163 | 0.704178 | 0.698166 | 1.702252    | 0.102911 | 0.991977 |
| <i>TSPAN12</i>  | 0.0106161 | 1.010673 | 0.548639 | 0.976213 | 1.046348    | 0.076596 | 0.991977 |
| <i>FOXF1</i>    | -0.229299 | 0.795091 | 0.391341 | 0.470673 | 1.343118    | 0.109651 | 0.991977 |
| <i>PADI3</i>    | 0.016691  | 1.016831 | 0.476666 | 0.971148 | 1.064663    | 0.08855  | 0.991977 |
| <i>SLC44A4</i>  | -0.002539 | 0.997464 | 0.709088 | 0.984246 | 1.01086     | 0.086141 | 0.991977 |

|                 |           |          |          |          |          |          |          |
|-----------------|-----------|----------|----------|----------|----------|----------|----------|
| <i>MS4A2</i>    | 0.0541157 | 1.055607 | 0.626588 | 0.84884  | 1.31274  | 0.089337 | 0.991977 |
| <i>CXCL14</i>   | -0.000227 | 0.999773 | 0.514572 | 0.999092 | 1.000455 | 0.100893 | 0.991977 |
| <i>DRAM1</i>    | -0.004229 | 0.99578  | 0.500361 | 0.983606 | 1.008104 | 0.048538 | 0.991977 |
| <i>CYP2B7P1</i> | 0.0043729 | 1.004383 | 0.572215 | 0.989256 | 1.01974  | 0.066906 | 0.991977 |
| <i>PVRL1</i>    | -0.000734 | 0.999266 | 0.386989 | 0.997606 | 1.000929 | 0.064783 | 0.991977 |
| <i>KRT1</i>     | -0.014684 | 0.985423 | 0.618524 | 0.930082 | 1.044057 | 0.071946 | 0.991977 |
| <i>MMP12</i>    | 0.0012097 | 1.00121  | 0.838548 | 0.989627 | 1.012929 | 0.058515 | 0.991977 |
| <i>RASGRF1</i>  | 0.0165059 | 1.016643 | 0.585659 | 0.958066 | 1.078801 | 0.063766 | 0.991977 |
| <i>SLCO4C1</i>  | -0.004652 | 0.995359 | 0.769051 | 0.964923 | 1.026754 | 0.062754 | 0.991977 |
| <i>LPL</i>      | -0.090383 | 0.913581 | 0.622435 | 0.637535 | 1.309152 | 0.086096 | 0.991977 |
| <i>ESPL1</i>    | 0.0214838 | 1.021716 | 0.694627 | 0.917802 | 1.137396 | 0.089708 | 0.991977 |
| <i>AIMIL</i>    | -0.012958 | 0.987126 | 0.395049 | 0.958084 | 1.017047 | 0.091551 | 0.991977 |
| <i>SYTI5</i>    | -0.069819 | 0.932563 | 0.460413 | 0.774761 | 1.122505 | 0.069719 | 0.991977 |
| <i>SRXN1</i>    | -0.000053 | 0.999947 | 0.889736 | 0.999195 | 1.000699 | 0.104804 | 0.991977 |
| <i>KRT31</i>    | 0.0002011 | 1.000201 | 0.817794 | 0.998492 | 1.001913 | 0.082112 | 0.991977 |
| <i>GPR115</i>   | 0.0053658 | 1.00538  | 0.533897 | 0.988526 | 1.022522 | 0.099673 | 0.991977 |
| <i>STRA6</i>    | -0.019891 | 0.980305 | 0.484358 | 0.92715  | 1.036508 | 0.060081 | 0.991977 |

|                 |           |          |          |          |          |          |          |
|-----------------|-----------|----------|----------|----------|----------|----------|----------|
| <i>RPS6KA2</i>  | -0.003645 | 0.996362 | 0.731855 | 0.975804 | 1.017352 | 0.101771 | 0.991977 |
| <i>LIMS2</i>    | -0.042084 | 0.95879  | 0.391185 | 0.870858 | 1.0556   | 0.093032 | 0.991977 |
| <i>SLC2A5</i>   | 0.0325636 | 1.0331   | 0.67751  | 0.886115 | 1.204466 | 0.080504 | 0.991977 |
| <i>TIMELESS</i> | -0.045895 | 0.955142 | 0.72115  | 0.742364 | 1.228909 | 0.069486 | 0.991977 |
| <i>RECQL4</i>   | 0.003805  | 1.003812 | 0.791661 | 0.975869 | 1.032556 | 0.073362 | 0.991977 |
| <i>GJB2</i>     | 0.0001288 | 1.000129 | 0.807327 | 0.999094 | 1.001164 | 0.062803 | 0.991977 |
| <i>FAM105A</i>  | -0.017267 | 0.982882 | 0.721667 | 0.893807 | 1.080834 | 0.126575 | 0.991977 |
| <i>MCM2</i>     | -0.000356 | 0.999645 | 0.877302 | 0.995143 | 1.004166 | 0.080243 | 0.991977 |
| <i>KIF18B</i>   | 0.0202985 | 1.020506 | 0.642285 | 0.936739 | 1.111763 | 0.095743 | 0.991977 |
| <i>MAD2L1</i>   | 0.0149432 | 1.015055 | 0.830526 | 0.885237 | 1.163911 | 0.094105 | 0.991977 |
| <i>BDH1</i>     | 0.0040695 | 1.004078 | 0.7069   | 0.983004 | 1.025604 | 0.051334 | 0.991977 |
| <i>SEMA3G</i>   | -0.056688 | 0.944889 | 0.795326 | 0.615692 | 1.4501   | 0.088024 | 0.991977 |
| <i>KRT76</i>    | -0.074817 | 0.927913 | 0.526039 | 0.736323 | 1.169354 | 0.09017  | 0.991977 |
| <i>MS4A15</i>   | 0.0265706 | 1.026927 | 0.890842 | 0.70265  | 1.50086  | 0.088585 | 0.991977 |
| <i>SLIT2</i>    | 0.0173407 | 1.017492 | 0.678815 | 0.937313 | 1.104529 | 0.088146 | 0.991977 |
| <i>SSTR1</i>    | 0.0703531 | 1.072887 | 0.735145 | 0.713727 | 1.612783 | 0.073591 | 0.991977 |
| <i>C11orf88</i> | 0.9200147 | 2.509327 | 0.498363 | 0.174955 | 35.99051 | 0.086325 | 0.991977 |

|                |           |          |          |          |          |          |          |
|----------------|-----------|----------|----------|----------|----------|----------|----------|
| <i>BTNL9</i>   | -0.003397 | 0.996609 | 0.847651 | 0.962664 | 1.031751 | 0.071546 | 0.991977 |
| <i>TMEM139</i> | 0.0109833 | 1.011044 | 0.599165 | 0.970472 | 1.053312 | 0.101791 | 0.991977 |
| <i>TCHHL1</i>  | 150.8895  | 0.000000 | 0.642197 | 0.000000 | inf      | 0.08723  | 0.991977 |
| <i>SLC16A9</i> | -0.010705 | 0.989352 | 0.757699 | 0.924303 | 1.058979 | 0.105913 | 0.991977 |
| <i>AKR1B10</i> | 0.0152276 | 1.015344 | 0.458162 | 0.975308 | 1.057024 | 0.082473 | 0.991977 |
| <i>TRIP13</i>  | 0.0054705 | 1.005485 | 0.757232 | 0.971207 | 1.040973 | 0.135851 | 0.991977 |
| <i>KRT83</i>   | -0.095647 | 0.908785 | 0.796767 | 0.438863 | 1.881888 | 0.086127 | 0.991977 |
| <i>HPGD</i>    | 0.0052167 | 1.00523  | 0.658843 | 0.982219 | 1.028781 | 0.084687 | 0.991977 |
| <i>RASL12</i>  | -0.030396 | 0.970061 | 0.635885 | 0.855365 | 1.100137 | 0.096013 | 0.991977 |
| <i>TRIM7</i>   | -0.02935  | 0.971077 | 0.474255 | 0.896067 | 1.052365 | 0.080149 | 0.991977 |
| <i>ITLN1</i>   | 0.4801799 | 1.616365 | 0.573887 | 0.303178 | 8.617509 | 0.100027 | 0.991977 |
| <i>C2orf39</i> | 0.0607939 | 1.06268  | 0.701503 | 0.778742 | 1.450145 | 0.092562 | 0.991977 |
| <i>ZPI</i>     | 0.4134972 | 1.512097 | 0.798142 | 0.063587 | 35.95738 | 0.08299  | 0.991977 |
| <i>TREM1</i>   | -0.022983 | 0.977279 | 0.725751 | 0.859503 | 1.111193 | 0.089271 | 0.991977 |
| <i>TUBB3</i>   | -0.001398 | 0.998603 | 0.842005 | 0.984969 | 1.012425 | 0.070128 | 0.991977 |
| <i>CAT</i>     | -0.002467 | 0.997536 | 0.778719 | 0.98052  | 1.014848 | 0.088938 | 0.991977 |
| <i>PKNOX2</i>  | -0.020365 | 0.979841 | 0.805054 | 0.833531 | 1.151833 | 0.098447 | 0.991977 |



|                |           |          |          |          |          |          |          |
|----------------|-----------|----------|----------|----------|----------|----------|----------|
| <i>PFN2</i>    | 0.0005835 | 1.000584 | 0.643189 | 0.998116 | 1.003057 | 0.096071 | 0.991977 |
| <i>CDKN3</i>   | -0.077504 | 0.925423 | 0.468263 | 0.750558 | 1.14103  | 0.094113 | 0.991977 |
| <i>FBLN5</i>   | -0.002476 | 0.997527 | 0.7234   | 0.983945 | 1.011298 | 0.076276 | 0.991977 |
| <i>TMEM117</i> | -0.013466 | 0.986624 | 0.813973 | 0.881939 | 1.103735 | 0.083696 | 0.991977 |
| <i>IGF2BP2</i> | 0.0006648 | 1.000665 | 0.770053 | 0.996215 | 1.005135 | 0.083073 | 0.991977 |
| <i>GATA6</i>   | -0.013241 | 0.986846 | 0.731857 | 0.914866 | 1.06449  | 0.093548 | 0.991977 |
| <i>BUB1</i>    | -0.021938 | 0.978301 | 0.803139 | 0.823309 | 1.16247  | 0.130334 | 0.991977 |
| <i>HAP1</i>    | 0.0018754 | 1.001877 | 0.88883  | 0.975876 | 1.028571 | 0.135311 | 0.991977 |
| <i>SFTPA1</i>  | -0.00216  | 0.997842 | 0.763061 | 0.983929 | 1.011953 | 0.097533 | 0.991977 |
| <i>NTN3</i>    | -0.247512 | 0.780741 | 0.741378 | 0.179527 | 3.39534  | 0.08868  | 0.991977 |
| <i>SLC6A4</i>  | -0.059286 | 0.942437 | 0.533453 | 0.782017 | 1.135765 | 0.074737 | 0.991977 |
| <i>CELSR2</i>  | 0.004919  | 1.004931 | 0.577733 | 0.987677 | 1.022486 | 0.097772 | 0.991977 |
| <i>ACE</i>     | -0.023055 | 0.977209 | 0.83881  | 0.782552 | 1.220286 | 0.081543 | 0.991977 |
| <i>WNK2</i>    | 0.0097512 | 1.009799 | 0.402967 | 0.986984 | 1.033141 | 0.078253 | 0.991977 |
| <i>MMP10</i>   | -0.182914 | 0.83284  | 0.554213 | 0.454276 | 1.526874 | 0.06518  | 0.991977 |
| <i>CAV1</i>    | -0.000648 | 0.999353 | 0.528385 | 0.997343 | 1.001367 | 0.070269 | 0.991977 |
| <i>SUSD2</i>   | 0.0028665 | 1.002871 | 0.558919 | 0.993276 | 1.012557 | 0.05453  | 0.991977 |

|                |           |          |          |          |          |          |          |
|----------------|-----------|----------|----------|----------|----------|----------|----------|
| <i>DPYSL2</i>  | -0.005893 | 0.994125 | 0.646167 | 0.969428 | 1.019451 | 0.073473 | 0.991977 |
| <i>C7orf52</i> | -1.907212 | 0.148494 | 0.80881  | 0.000000 | 760559.2 | 0.093646 | 0.991977 |
| <i>TNNC1</i>   | 0.0528474 | 1.054269 | 0.696777 | 0.808187 | 1.375278 | 0.092323 | 0.991977 |
| <i>HMX3</i>    | 0.0575781 | 1.059268 | 0.893832 | 0.454746 | 2.46742  | 0.09997  | 0.993159 |
| <i>CDO1</i>    | 0.0057554 | 1.005772 | 0.895864 | 0.922721 | 1.096298 | 0.089866 | 0.993159 |
| <i>CHI3L2</i>  | 0.0028826 | 1.002887 | 0.894858 | 0.960916 | 1.04669  | 0.091706 | 0.993159 |
| <i>SBSN</i>    | -0.007485 | 0.992543 | 0.896213 | 0.886968 | 1.110685 | 0.102564 | 0.993159 |
| <i>KMO</i>     | 0.0667933 | 1.069074 | 0.897394 | 0.387361 | 2.950528 | 0.087336 | 0.993274 |
| <i>TP73</i>    | -0.00079  | 0.99921  | 0.904483 | 0.986393 | 1.012193 | 0.040647 | 0.998264 |
| <i>GPR116</i>  | 0.0004626 | 1.000463 | 0.906568 | 0.992764 | 1.008222 | 0.072907 | 0.998264 |
| <i>SFTA2</i>   | -0.002091 | 0.997911 | 0.910262 | 0.962271 | 1.034871 | 0.090524 | 0.998264 |
| <i>LY6D</i>    | 0.000044  | 1.000044 | 0.910564 | 0.999277 | 1.000811 | 0.088228 | 0.998264 |
| <i>ANK2</i>    | 0.0034462 | 1.003452 | 0.907696 | 0.946665 | 1.063646 | 0.084395 | 0.998264 |
| <i>NPM3</i>    | 0.0012974 | 1.001298 | 0.90928  | 0.979201 | 1.023894 | 0.082825 | 0.998264 |
| <i>NCCRPI</i>  | 0.0017915 | 1.001793 | 0.903154 | 0.973297 | 1.031123 | 0.091343 | 0.998264 |
| <i>EYA2</i>    | 0.0010493 | 1.00105  | 0.910392 | 0.982923 | 1.019511 | 0.06995  | 0.998264 |
| <i>COL17A1</i> | -0.000026 | 0.999975 | 0.935937 | 0.999354 | 1.000595 | 0.105129 | 0.998649 |

|                  |           |          |          |          |          |          |          |
|------------------|-----------|----------|----------|----------|----------|----------|----------|
| <i>CADM3</i>     | 0.0003749 | 1.000375 | 0.982055 | 0.968226 | 1.033591 | 0.090037 | 0.998649 |
| <i>KLK6</i>      | -0.000278 | 0.999722 | 0.971379 | 0.984636 | 1.015038 | 0.055651 | 0.998649 |
| <i>SFN</i>       | 0.000001  | 1.000001 | 0.996535 | 0.999583 | 1.000419 | 0.08552  | 0.998649 |
| <i>TFAP2B</i>    | -0.000435 | 0.999565 | 0.941688 | 0.987977 | 1.011289 | 0.075306 | 0.998649 |
| <i>FOXJ1</i>     | 0.0002749 | 1.000275 | 0.965526 | 0.987882 | 1.012823 | 0.090914 | 0.998649 |
| <i>COL11A1</i>   | -0.001097 | 0.998903 | 0.929602 | 0.974876 | 1.023523 | 0.090428 | 0.998649 |
| <i>CDH3</i>      | -0.000016 | 0.999984 | 0.984064 | 0.998386 | 1.001584 | 0.071569 | 0.998649 |
| <i>FCN1</i>      | 0.0014117 | 1.001413 | 0.978498 | 0.903706 | 1.109683 | 0.065053 | 0.998649 |
| <i>DSC2</i>      | -0.000017 | 0.999983 | 0.991954 | 0.996647 | 1.00333  | 0.081839 | 0.998649 |
| <i>PRAME</i>     | 0.0001044 | 1.000104 | 0.931138 | 0.99774  | 1.002474 | 0.069501 | 0.998649 |
| <i>TGM1</i>      | -0.000169 | 0.999831 | 0.97412  | 0.989689 | 1.010077 | 0.088846 | 0.998649 |
| <i>MACROD2</i>   | -0.0008   | 0.9992   | 0.97161  | 0.956137 | 1.044203 | 0.085606 | 0.998649 |
| <i>ODZ4</i>      | 0.0026787 | 1.002682 | 0.913677 | 0.955276 | 1.052441 | 0.092401 | 0.998649 |
| <i>C20orf186</i> | -0.007994 | 0.992038 | 0.989927 | 0.286808 | 3.43135  | 0.08372  | 0.998649 |
| <i>CDC48</i>     | -0.000913 | 0.999088 | 0.92553  | 0.980152 | 1.018389 | 0.045145 | 0.998649 |
| <i>RAB37</i>     | -0.001209 | 0.998791 | 0.980929 | 0.904509 | 1.102901 | 0.083619 | 0.998649 |
| <i>SEMA4B</i>    | 0.000002  | 1.000002 | 0.99614  | 0.99928  | 1.000724 | 0.069479 | 0.998649 |

|                 |           |          |          |          |          |          |          |
|-----------------|-----------|----------|----------|----------|----------|----------|----------|
| <i>FAM167A</i>  | -0.004096 | 0.995913 | 0.915884 | 0.923024 | 1.074557 | 0.088491 | 0.998649 |
| <i>GJB3</i>     | 0.000074  | 1.000074 | 0.978058 | 0.994823 | 1.005352 | 0.08906  | 0.998649 |
| <i>PI3</i>      | 0.000052  | 1.000052 | 0.93028  | 0.998881 | 1.001225 | 0.083953 | 0.998649 |
| <i>PLA2G1B</i>  | 0.0104954 | 1.010551 | 0.953838 | 0.708321 | 1.441738 | 0.068043 | 0.998649 |
| <i>MMP11</i>    | -0.000113 | 0.999887 | 0.943778 | 0.996762 | 1.003022 | 0.053667 | 0.998649 |
| <i>MYB</i>      | 0.000033  | 1.000033 | 0.99623  | 0.98643  | 1.013824 | 0.089876 | 0.998649 |
| <i>SSTR5</i>    | -0.004536 | 0.995474 | 0.987197 | 0.572013 | 1.732422 | 0.095835 | 0.998649 |
| <i>TIE1</i>     | -0.001311 | 0.99869  | 0.949991 | 0.9586   | 1.040456 | 0.089935 | 0.998649 |
| <i>ABCA4</i>    | -0.001069 | 0.998932 | 0.941685 | 0.970736 | 1.027947 | 0.086074 | 0.998649 |
| <i>KIAA1683</i> | 0.0027634 | 1.002767 | 0.991686 | 0.596307 | 1.686282 | 0.100693 | 0.998649 |
| <i>MFAP4</i>    | -0.000007 | 0.999993 | 0.99709  | 0.996459 | 1.003541 | 0.088162 | 0.998649 |
| <i>RFC4</i>     | -0.000069 | 0.999932 | 0.988259 | 0.990896 | 1.00905  | 0.078955 | 0.998649 |
| <i>GMPS</i>     | 0.0001088 | 1.000109 | 0.964199 | 0.995369 | 1.004872 | 0.050655 | 0.998649 |
| <i>GNG11</i>    | -0.002215 | 0.997787 | 0.925957 | 0.952248 | 1.045504 | 0.089677 | 0.998649 |
| <i>EPAS1</i>    | 0.0001277 | 1.000128 | 0.956339 | 0.995565 | 1.004712 | 0.106404 | 0.998649 |
| <i>SELV</i>     | 0.0204682 | 1.020679 | 0.988637 | 0.061038 | 17.06769 | 0.092369 | 0.998649 |
| <i>DPCR1</i>    | -0.019814 | 0.980381 | 0.919109 | 0.668846 | 1.437024 | 0.098196 | 0.998649 |

|                 |           |          |          |          |                        |          |          |
|-----------------|-----------|----------|----------|----------|------------------------|----------|----------|
| <i>SMOC1</i>    | 0.0005638 | 1.000564 | 0.92234  | 0.989286 | 1.01197                | 0.09131  | 0.998649 |
| <i>CSF3R</i>    | 0.000076  | 1.000076 | 0.992556 | 0.98427  | 1.016135               | 0.091802 | 0.998649 |
| <i>CRABP2</i>   | -0.000047 | 0.999953 | 0.967849 | 0.997659 | 1.002252               | 0.108064 | 0.998649 |
| <i>TMEM132A</i> | -0.00015  | 0.99985  | 0.919003 | 0.996966 | 1.002742               | 0.0911   | 0.998649 |
| <i>TMEM158</i>  | -0.000086 | 0.999914 | 0.993971 | 0.977839 | 1.022487               | 0.078245 | 0.998649 |
| <i>B4GALT4</i>  | 0.000064  | 1.000064 | 0.974291 | 0.996165 | 1.003979               | 0.059765 | 0.998649 |
| <i>C1orf157</i> | -0.001941 | 0.99806  | 0.99545  | 0.512086 | 1.945229               | 0.084255 | 0.998649 |
| <i>LYPD6B</i>   | -0.000902 | 0.999098 | 0.985147 | 0.908553 | 1.098667               | 0.089739 | 0.998649 |
| <i>GALNT14</i>  | -0.000453 | 0.999547 | 0.913944 | 0.99136  | 1.007801               | 0.074518 | 0.998649 |
| <i>C13orf36</i> | 0.0029468 | 1.002951 | 0.980547 | 0.791417 | 1.271025               | 0.069884 | 0.998649 |
| <i>COX4I2</i>   | -0.044669 | 0.956314 | 0.938679 | 0.30645  | 2.984296               | 0.085801 | 0.998649 |
| <i>FABP4</i>    | 0.0004893 | 1.000489 | 0.934573 | 0.988869 | 1.012246               | 0.096903 | 0.998649 |
| <i>C12orf77</i> | 0.0028495 | 1.002854 | 0.989855 | 0.646379 | 1.555921               | 0.090005 | 0.998649 |
| <i>HMGA2</i>    | -0.000074 | 0.999926 | 0.988583 | 0.989873 | 1.010082               | 0.090345 | 0.998649 |
| <i>CALML5</i>   | 0.000020  | 1.00002  | 0.988447 | 0.997374 | 1.002673               | 0.08539  | 0.998649 |
| <i>FANCI</i>    | 0.0011307 | 1.001131 | 0.97651  | 0.928547 | 1.07939                | 0.093106 | 0.998649 |
| <i>DEFA4</i>    | -29.8598  | 0.000000 | 0.920988 | 0.000000 | 1.89x10 <sup>243</sup> | 0.091703 | 0.998649 |

|                      |           |          |          |          |          |          |          |
|----------------------|-----------|----------|----------|----------|----------|----------|----------|
| <i>FLRT3</i>         | -0.000144 | 0.999856 | 0.986358 | 0.983522 | 1.016462 | 0.085088 | 0.998649 |
| <i>AKRIC3</i>        | 0.000003  | 1.000003 | 0.992086 | 0.999449 | 1.000557 | 0.087897 | 0.998649 |
| <i>SCN7A</i>         | 0.001618  | 1.001619 | 0.987078 | 0.823506 | 1.218257 | 0.113924 | 0.998649 |
| <i>KRT23</i>         | -0.000087 | 0.999913 | 0.992776 | 0.981246 | 1.018935 | 0.072654 | 0.998649 |
| <i>PLAU</i>          | -0.000017 | 0.999983 | 0.971234 | 0.99908  | 1.000888 | 0.08244  | 0.998649 |
| <i>GLDN</i>          | -0.011339 | 0.988725 | 0.938089 | 0.742691 | 1.316264 | 0.090745 | 0.998649 |
| <i>FAM84A</i>        | -0.000233 | 0.999767 | 0.928686 | 0.994674 | 1.004885 | 0.090151 | 0.998649 |
| <i>ALOX15B</i>       | -0.000713 | 0.999287 | 0.966239 | 0.966841 | 1.032822 | 0.099557 | 0.998649 |
| <i>GINS1</i>         | -0.001822 | 0.99818  | 0.959695 | 0.930073 | 1.071273 | 0.089705 | 0.998649 |
| <i>NKX2-1</i>        | 0.0020103 | 1.002012 | 0.932397 | 0.956535 | 1.049652 | 0.074884 | 0.998649 |
| <i>TNS4</i>          | -0.000138 | 0.999862 | 0.969794 | 0.992764 | 1.007011 | 0.083286 | 0.998649 |
| <i>SULF1</i>         | -0.000022 | 0.999978 | 0.996337 | 0.990498 | 1.009548 | 0.080469 | 0.998649 |
| <i>RASSF6</i>        | 0.0005788 | 1.000579 | 0.955469 | 0.980456 | 1.021115 | 0.081864 | 0.998649 |
| <i>RASGEFIC</i>      | -0.03267  | 0.967858 | 0.980294 | 0.072435 | 12.93223 | 0.103138 | 0.998649 |
| <i>ADAMDEC<br/>I</i> | -0.000243 | 0.999757 | 0.993827 | 0.940124 | 1.063173 | 0.096999 | 0.998649 |
| <i>FSCN1</i>         | -0.000037 | 0.999963 | 0.978884 | 0.997263 | 1.002671 | 0.090781 | 0.998649 |

|                 |           |          |          |          |          |          |          |
|-----------------|-----------|----------|----------|----------|----------|----------|----------|
| <i>PRRX2</i>    | 0.0016882 | 1.00169  | 0.997565 | 0.33867  | 2.962714 | 0.10246  | 0.998649 |
| <i>SOX9</i>     | -0.000037 | 0.999963 | 0.993733 | 0.990761 | 1.00925  | 0.094292 | 0.998649 |
| <i>ETNK2</i>    | -0.000901 | 0.9991   | 0.915944 | 0.982529 | 1.01595  | 0.079041 | 0.998649 |
| <i>CCDC48</i>   | -0.006095 | 0.993924 | 0.979359 | 0.626383 | 1.577125 | 0.076451 | 0.998649 |
| <i>FMO2</i>     | 0.0002463 | 1.000246 | 0.953036 | 0.992081 | 1.008479 | 0.080969 | 0.998649 |
| <i>PTHLH</i>    | -0.000062 | 0.999938 | 0.925473 | 0.998636 | 1.001242 | 0.092507 | 0.998649 |
| <i>FGB</i>      | 0.0003436 | 1.000344 | 0.989411 | 0.950842 | 1.052422 | 0.087309 | 0.998649 |
| <i>UGT8</i>     | -0.001179 | 0.998822 | 0.937198 | 0.969959 | 1.028544 | 0.083337 | 0.998649 |
| <i>ANXA3</i>    | 0.0013819 | 1.001383 | 0.937099 | 0.967598 | 1.036348 | 0.088872 | 0.998649 |
| <i>SERPINE2</i> | 0.0009168 | 1.000917 | 0.987525 | 0.892257 | 1.12281  | 0.081855 | 0.998649 |
| <i>CDH2</i>     | 0.0021093 | 1.002112 | 0.933555 | 0.953632 | 1.053055 | 0.193271 | 0.998649 |
| <i>C8orf4</i>   | -0.000836 | 0.999165 | 0.942012 | 0.976917 | 1.021919 | 0.074831 | 0.998649 |
| <i>JUP</i>      | 0.000000  | 1        | 0.998874 | 0.999599 | 1.000402 | 0.07191  | 0.998874 |

---

HR, Hazard Ratio; lower.95, lower limit of 95% confidence interval; upper.95, upper limit of 95% confidence interval; test.ph, P value of proportional hazards assumption; FDR, false discovery rate.

Table SVIII. Results of sensitivity analyses.

| A,LUAD        |            |       |          |                       |                                                                       |                       |
|---------------|------------|-------|----------|-----------------------|-----------------------------------------------------------------------|-----------------------|
| Gene          |            | HR    | <i>F</i> | <i>P</i> <sup>2</sup> | LOO HR (95% CI)                                                       | LOO P                 |
| <i>ARNTL2</i> | cg26165146 | 1.037 | 24.219   | 0.759                 | 1.05x10 <sup>1</sup> (1.01x10 <sup>1</sup> -1.09x10 <sup>1</sup> )    | 2.22x10 <sup>-2</sup> |
|               | cg17367616 |       |          |                       | 1.04x10 <sup>1</sup> (1.02x10 <sup>1</sup> -1.06x10 <sup>1</sup> )    | 1.90x10 <sup>-4</sup> |
|               | cg01986577 |       |          |                       | 1.04x10 <sup>1</sup> (1.02x10 <sup>1</sup> -1.06x10 <sup>1</sup> )    | 1.87x10 <sup>-4</sup> |
| <i>SEMA3G</i> | cg25134747 | 0.632 | 0.469    | NA                    |                                                                       |                       |
| <i>SDPR</i>   | cg10082589 | 0.980 | 4.746    | 0                     | 9.81x10 <sup>-1</sup> (9.71x10 <sup>-1</sup> -9.92x10 <sup>-1</sup> ) | 5.18x10 <sup>-4</sup> |
|               | cg18843739 |       |          |                       | 9.79x10 <sup>-1</sup> (9.68x10 <sup>-1</sup> -9.90x10 <sup>-1</sup> ) | 3.38x10 <sup>-4</sup> |
| <i>CLIC5</i>  | cg23716866 | 0.987 | 9.891    | 0.782                 | 9.90x10 <sup>-1</sup> (9.80x10 <sup>-1</sup> -1.00x10 <sup>1</sup> )  | 7.12x10 <sup>-2</sup> |
|               | cg14339765 |       |          |                       |                                                                       |                       |
|               | cg09347495 |       |          |                       | 9.87x10 <sup>-1</sup> (9.80x10 <sup>-1</sup> -9.95x10 <sup>-1</sup> ) | 7.39x10 <sup>-4</sup> |
| <i>LIMS2</i>  | cg07262244 | 0.924 | 1.647    | 0.079                 | 9.18x10 <sup>-1</sup> (8.75x10 <sup>-1</sup> -9.64x10 <sup>-1</sup> ) | 5.59x10 <sup>-4</sup> |
|               | cg14282137 |       |          |                       | 9.28x10 <sup>-1</sup> (8.82x10 <sup>-1</sup> -9.75x10 <sup>-1</sup> ) | 3.16x10 <sup>-3</sup> |
|               | cg08385249 |       |          |                       | 9.28x10 <sup>-1</sup> (8.81x10 <sup>-1</sup> -9.77x10 <sup>-1</sup> ) | 4.17x10 <sup>-3</sup> |
|               | cg23966569 |       |          |                       | 9.21x10 <sup>-1</sup> (8.79x10 <sup>-1</sup> -9.70x10 <sup>-1</sup> ) | 5.01x10 <sup>-4</sup> |



|                  | cg22542731 |          |          |                       | 9.25x10 <sup>-1</sup> (8.83x10 <sup>-1</sup> -9.70x10 <sup>-1</sup> )   | 1.34x10 <sup>-3</sup> |
|------------------|------------|----------|----------|-----------------------|-------------------------------------------------------------------------|-----------------------|
| <i>EMP2</i>      | cg04339790 | 0.997    | 44.002   | NA                    |                                                                         |                       |
| <i>CA7</i>       | cg10352418 | 1.34E-09 | 0.270    | 0                     | 1.99x10 <sup>3</sup> (1.25x10 <sup>-20</sup> -1.37x10 <sup>26</sup> )   | 7.81x10 <sup>-1</sup> |
|                  | cg06438797 |          |          |                       | 1.10x10 <sup>-13</sup> (9.44x10 <sup>-26</sup> -1.28x10 <sup>-1</sup> ) | 3.53x10 <sup>-2</sup> |
|                  | cg11258532 |          |          |                       |                                                                         |                       |
|                  | cg00182273 |          |          |                       | 1.34x10 <sup>-9</sup> (2.33x10 <sup>-15</sup> -7.68x10 <sup>-4</sup> )  | 2.53x10 <sup>-3</sup> |
| <i>LOC116437</i> | cg20183756 | 0.141    | 0.635    | 0.327                 | 8.33x10 <sup>-3</sup> (2.77x10 <sup>-5</sup> -2.5x10 <sup>1</sup> )     | 1.00x10 <sup>-1</sup> |
|                  | cg03859668 |          |          |                       | 1.75x10 <sup>-1</sup> (5.56x10 <sup>-2</sup> -5.50x10 <sup>-1</sup> )   | 2.87x10 <sup>-3</sup> |
| <hr/>            |            |          |          |                       |                                                                         |                       |
| B,LUSC           |            |          |          |                       |                                                                         |                       |
| <hr/>            |            |          |          |                       |                                                                         |                       |
| Gene             |            | HR       | <i>F</i> | <i>I</i> <sup>2</sup> | LOO HR (95% CI)                                                         | LOO P                 |
| <i>PREX2</i>     | cg13652336 | 1.958    | 1.742    | 0.631                 | 2.05x10 <sup>1</sup> (1.51x10 <sup>1</sup> -2.79x10 <sup>1</sup> )      | 4.29x10 <sup>-6</sup> |
|                  | cg16009633 |          |          |                       | 1.65x10 <sup>1</sup> (1.13x10 <sup>1</sup> -2.41x10 <sup>1</sup> )      | 9.71x10 <sup>-3</sup> |
|                  | cg11549615 |          |          |                       | 1.57x10 <sup>1</sup> (9.03x10 <sup>-1</sup> -2.73x10 <sup>1</sup> )     | 1.10x10 <sup>-1</sup> |
|                  | cg05293738 |          |          |                       | 1.96x10 <sup>1</sup> (1.46x10 <sup>1</sup> -2.64x10 <sup>1</sup> )      | 8.59x10 <sup>-6</sup> |
|                  | cg17747005 |          |          |                       | 2.20x10 <sup>1</sup> (1.60x10 <sup>1</sup> -3.03x10 <sup>1</sup> )      | 1.40x10 <sup>-6</sup> |
| <hr/>            |            |          |          |                       |                                                                         |                       |

LOO HR (95% CI), leave-one-out cross validation analysis hazard ratio (95% confidence interval); LOO P, leave-one-out cross validation analysis P-value.
